# Supplementary material for: [Retracted] Investigating Celastrol’s Anti‐DCM Targets and Mechanisms via Network Pharmacology and Experimental Validation
Source: Hindawi journal article supplement (doi:10.1155/2022/7382130), 2022-01-01
Supplement: f2 [file 7382130.f2.txt]

Target
ACE
ACP1
AGTR1
AKR1B1
ALDH2
ALOX12
AR
ATP12A
BAX
BCL2
BCL2L1
CASP1
CASP3
CASP8
CASP9
CCND1
CDK4
CDKN1A
CREB1
CSF2
CTSB
CYP17A1
CYP19A1
DPP4
EDNRA
EDNRB
F2
F9
FASLG
FGF2
FOS
GPBAR1
HSD11B1
ICAM1
IKBKB
IL1B
IL6
ITGA4
JAK2
JUN
MAPK8
MCL1
MDM2
MMP1
MMP2
MMP3
MMP9
MPO
MTFMT
MTHFR
NFKBIA
NOS3
NR1H2
NR1H4
NR3C1
NR3C2
OPRM1
PECAM1
PPARG
PRKCA
PTGS2
PTPN1
PTPN11
RCE1
RELA
REN
SELE
SHBG
STAT3
STS
TERT
TLR9
TNF
TP63
TUBB1
VEGFA
