# Supplementary material for: [Retracted] Investigating Celastrol’s Anti‐DCM Targets and Mechanisms via Network Pharmacology and Experimental Validation
Source: Hindawi journal article supplement (doi:10.1155/2022/7382130), 2022-01-01
Supplement: f4 [file 7382130.f4.txt]

ONTOLOGY	ID	Description	GeneRatio	BgRatio	pvalue	p.adjust	qvalue	geneID	Count
BP	GO:0000302	response to reactive oxygen species	4/5	232/18670	1.15E-07	0.000127671	1.92E-05	IL6/TNF/CASP3/MAPK8	4
BP	GO:0018105	peptidyl-serine phosphorylation	4/5	299/18670	3.18E-07	0.000127671	1.92E-05	IL6/VEGFA/TNF/MAPK8	4
BP	GO:0018209	peptidyl-serine modification	4/5	322/18670	4.28E-07	0.000127671	1.92E-05	IL6/VEGFA/TNF/MAPK8	4
BP	GO:0032496	response to lipopolysaccharide	4/5	330/18670	4.73E-07	0.000127671	1.92E-05	IL6/TNF/CASP3/MAPK8	4
BP	GO:0002237	response to molecule of bacterial origin	4/5	343/18670	5.52E-07	0.000127671	1.92E-05	IL6/TNF/CASP3/MAPK8	4
BP	GO:0022407	regulation of cell-cell adhesion	4/5	403/18670	1.05E-06	0.000202749	3.04E-05	IL6/VEGFA/TNF/CASP3	4
BP	GO:0051090	regulation of DNA-binding transcription factor activity	4/5	432/18670	1.39E-06	0.000220405	3.31E-05	IL6/VEGFA/TNF/MAPK8	4
BP	GO:0006979	response to oxidative stress	4/5	451/18670	1.65E-06	0.000220405	3.31E-05	IL6/TNF/CASP3/MAPK8	4
BP	GO:0033138	positive regulation of peptidyl-serine phosphorylation	3/5	105/18670	1.71E-06	0.000220405	3.31E-05	IL6/VEGFA/TNF	3
BP	GO:0002687	positive regulation of leukocyte migration	3/5	128/18670	3.12E-06	0.000341861	5.13E-05	IL6/VEGFA/TNF	3
BP	GO:0150065	regulation of deacetylase activity	2/5	12/18670	3.78E-06	0.000341861	5.13E-05	VEGFA/MAPK8	2
BP	GO:0033135	regulation of peptidyl-serine phosphorylation	3/5	139/18670	3.99E-06	0.000341861	5.13E-05	IL6/VEGFA/TNF	3
BP	GO:1901550	regulation of endothelial cell development	2/5	13/18670	4.47E-06	0.000341861	5.13E-05	VEGFA/TNF	2
BP	GO:1903140	regulation of establishment of endothelial barrier	2/5	13/18670	4.47E-06	0.000341861	5.13E-05	VEGFA/TNF	2
BP	GO:0051384	response to glucocorticoid	3/5	146/18670	4.63E-06	0.000341861	5.13E-05	IL6/TNF/CASP3	3
BP	GO:0002262	myeloid cell homeostasis	3/5	147/18670	4.73E-06	0.000341861	5.13E-05	IL6/VEGFA/CASP3	3
BP	GO:0034250	positive regulation of cellular amide metabolic process	3/5	153/18670	5.33E-06	0.000355304	5.33E-05	IL6/TNF/CASP3	3
BP	GO:0045073	regulation of chemokine biosynthetic process	2/5	15/18670	6.02E-06	0.000355304	5.33E-05	IL6/TNF	2
BP	GO:0031960	response to corticosteroid	3/5	162/18670	6.33E-06	0.000355304	5.33E-05	IL6/TNF/CASP3	3
BP	GO:0042033	chemokine biosynthetic process	2/5	16/18670	6.88E-06	0.000355304	5.33E-05	IL6/TNF	2
BP	GO:0050755	chemokine metabolic process	2/5	16/18670	6.88E-06	0.000355304	5.33E-05	IL6/TNF	2
BP	GO:1902004	positive regulation of amyloid-beta formation	2/5	16/18670	6.88E-06	0.000355304	5.33E-05	TNF/CASP3	2
BP	GO:0034614	cellular response to reactive oxygen species	3/5	168/18670	7.06E-06	0.000355304	5.33E-05	IL6/TNF/MAPK8	3
BP	GO:0051023	regulation of immunoglobulin secretion	2/5	18/18670	8.76E-06	0.000405606	6.09E-05	IL6/TNF	2
BP	GO:0150078	positive regulation of neuroinflammatory response	2/5	18/18670	8.76E-06	0.000405606	6.09E-05	IL6/TNF	2
BP	GO:0010888	negative regulation of lipid storage	2/5	19/18670	9.79E-06	0.0004197	6.30E-05	IL6/TNF	2
BP	GO:0060252	positive regulation of glial cell proliferation	2/5	19/18670	9.79E-06	0.0004197	6.30E-05	IL6/TNF	2
BP	GO:0050731	positive regulation of peptidyl-tyrosine phosphorylation	3/5	192/18670	1.05E-05	0.000432695	6.50E-05	IL6/VEGFA/TNF	3
BP	GO:1902993	positive regulation of amyloid precursor protein catabolic process	2/5	20/18670	1.09E-05	0.000432695	6.50E-05	TNF/CASP3	2
BP	GO:0002685	regulation of leukocyte migration	3/5	196/18670	1.12E-05	0.000432695	6.50E-05	IL6/VEGFA/TNF	3
BP	GO:0071222	cellular response to lipopolysaccharide	3/5	205/18670	1.28E-05	0.000478222	7.18E-05	IL6/TNF/MAPK8	3
BP	GO:0048305	immunoglobulin secretion	2/5	22/18670	1.32E-05	0.000478222	7.18E-05	IL6/TNF	2
BP	GO:0071219	cellular response to molecule of bacterial origin	3/5	212/18670	1.42E-05	0.000497704	7.47E-05	IL6/TNF/MAPK8	3
BP	GO:0006309	apoptotic DNA fragmentation	2/5	26/18670	1.86E-05	0.000632973	9.50E-05	IL6/CASP3	2
BP	GO:0071216	cellular response to biotic stimulus	3/5	236/18670	1.96E-05	0.000645563	9.69E-05	IL6/TNF/MAPK8	3
BP	GO:0048143	astrocyte activation	2/5	27/18670	2.01E-05	0.000645563	9.69E-05	IL6/TNF	2
BP	GO:1902003	regulation of amyloid-beta formation	2/5	28/18670	2.16E-05	0.000674774	0.000101294	TNF/CASP3	2
BP	GO:0048872	homeostasis of number of cells	3/5	246/18670	2.22E-05	0.000674774	0.000101294	IL6/VEGFA/CASP3	3
BP	GO:0031063	regulation of histone deacetylation	2/5	29/18670	2.32E-05	0.000689132	0.00010345	VEGFA/MAPK8	2
BP	GO:0050730	regulation of peptidyl-tyrosine phosphorylation	3/5	256/18670	2.50E-05	0.000722192	0.000108413	IL6/VEGFA/TNF	3
BP	GO:0051091	positive regulation of DNA-binding transcription factor activity	3/5	261/18670	2.65E-05	0.000732743	0.000109996	IL6/VEGFA/TNF	3
BP	GO:0002675	positive regulation of acute inflammatory response	2/5	31/18670	2.66E-05	0.000732743	0.000109996	IL6/TNF	2
BP	GO:0000737	DNA catabolic process, endonucleolytic	2/5	34/18670	3.21E-05	0.000837492	0.000125721	IL6/CASP3	2
BP	GO:0034205	amyloid-beta formation	2/5	34/18670	3.21E-05	0.000837492	0.000125721	TNF/CASP3	2
BP	GO:0030262	apoptotic nuclear changes	2/5	35/18670	3.40E-05	0.000837492	0.000125721	IL6/CASP3	2
BP	GO:0060251	regulation of glial cell proliferation	2/5	35/18670	3.40E-05	0.000837492	0.000125721	IL6/TNF	2
BP	GO:1902991	regulation of amyloid precursor protein catabolic process	2/5	35/18670	3.40E-05	0.000837492	0.000125721	TNF/CASP3	2
BP	GO:0051403	stress-activated MAPK cascade	3/5	286/18670	3.48E-05	0.000838164	0.000125822	VEGFA/TNF/MAPK8	3
BP	GO:0006921	cellular component disassembly involved in execution phase of apoptosis	2/5	37/18670	3.81E-05	0.000898973	0.00013495	IL6/CASP3	2
BP	GO:0034599	cellular response to oxidative stress	3/5	302/18670	4.09E-05	0.000946584	0.000142097	IL6/TNF/MAPK8	3
BP	GO:1903037	regulation of leukocyte cell-cell adhesion	3/5	304/18670	4.17E-05	0.000946584	0.000142097	IL6/TNF/CASP3	3
BP	GO:0031098	stress-activated protein kinase signaling cascade	3/5	315/18670	4.64E-05	0.000985675	0.000147966	VEGFA/TNF/MAPK8	3
BP	GO:0006308	DNA catabolic process	2/5	41/18670	4.69E-05	0.000985675	0.000147966	IL6/CASP3	2
BP	GO:0061028	establishment of endothelial barrier	2/5	41/18670	4.69E-05	0.000985675	0.000147966	VEGFA/TNF	2
BP	GO:0150077	regulation of neuroinflammatory response	2/5	41/18670	4.69E-05	0.000985675	0.000147966	IL6/TNF	2
BP	GO:0060562	epithelial tube morphogenesis	3/5	322/18670	4.95E-05	0.001014901	0.000152353	VEGFA/TNF/CASP3	3
BP	GO:0032103	positive regulation of response to external stimulus	3/5	323/18670	5.00E-05	0.001014901	0.000152353	IL6/VEGFA/TNF	3
BP	GO:0014002	astrocyte development	2/5	44/18670	5.40E-05	0.001024953	0.000153862	IL6/TNF	2
BP	GO:0042987	amyloid precursor protein catabolic process	2/5	44/18670	5.40E-05	0.001024953	0.000153862	TNF/CASP3	2
BP	GO:0045601	regulation of endothelial cell differentiation	2/5	44/18670	5.40E-05	0.001024953	0.000153862	VEGFA/TNF	2
BP	GO:0090311	regulation of protein deacetylation	2/5	44/18670	5.40E-05	0.001024953	0.000153862	VEGFA/MAPK8	2
BP	GO:0007159	leukocyte cell-cell adhesion	3/5	337/18670	5.67E-05	0.001058919	0.000158961	IL6/TNF/CASP3	3
BP	GO:0010883	regulation of lipid storage	2/5	46/18670	5.91E-05	0.001065992	0.000160022	IL6/TNF	2
BP	GO:0001101	response to acid chemical	3/5	343/18670	5.98E-05	0.001065992	0.000160022	VEGFA/TNF/CASP3	3
BP	GO:0010721	negative regulation of cell development	3/5	344/18670	6.03E-05	0.001065992	0.000160022	IL6/VEGFA/TNF	3
BP	GO:0006953	acute-phase response	2/5	47/18670	6.17E-05	0.001065992	0.000160022	IL6/TNF	2
BP	GO:0050435	amyloid-beta metabolic process	2/5	47/18670	6.17E-05	0.001065992	0.000160022	TNF/CASP3	2
BP	GO:0001774	microglial cell activation	2/5	48/18670	6.44E-05	0.001079981	0.000162122	IL6/TNF	2
BP	GO:0002269	leukocyte activation involved in inflammatory response	2/5	48/18670	6.44E-05	0.001079981	0.000162122	IL6/TNF	2
BP	GO:0035094	response to nicotine	2/5	49/18670	6.71E-05	0.001109734	0.000166589	TNF/CASP3	2
BP	GO:0014009	glial cell proliferation	2/5	50/18670	6.99E-05	0.001137876	0.000170813	IL6/TNF	2
BP	GO:0018108	peptidyl-tyrosine phosphorylation	3/5	363/18670	7.08E-05	0.001137876	0.000170813	IL6/VEGFA/TNF	3
BP	GO:0018212	peptidyl-tyrosine modification	3/5	366/18670	7.26E-05	0.001137876	0.000170813	IL6/VEGFA/TNF	3
BP	GO:0045599	negative regulation of fat cell differentiation	2/5	51/18670	7.28E-05	0.001137876	0.000170813	IL6/TNF	2
BP	GO:0048545	response to steroid hormone	3/5	385/18670	8.44E-05	0.001301583	0.000195388	IL6/TNF/CASP3	3
BP	GO:0060688	regulation of morphogenesis of a branching structure	2/5	56/18670	8.79E-05	0.00133749	0.000200779	VEGFA/TNF	2
BP	GO:0043525	positive regulation of neuron apoptotic process	2/5	57/18670	9.10E-05	0.001367978	0.000205355	TNF/CASP3	2
BP	GO:0032722	positive regulation of chemokine production	2/5	58/18670	9.43E-05	0.001380817	0.000207283	IL6/TNF	2
BP	GO:0061900	glial cell activation	2/5	58/18670	9.43E-05	0.001380817	0.000207283	IL6/TNF	2
BP	GO:0045785	positive regulation of cell adhesion	3/5	403/18670	9.67E-05	0.001393827	0.000209236	IL6/VEGFA/TNF	3
BP	GO:0001885	endothelial cell development	2/5	59/18670	9.76E-05	0.001393827	0.000209236	VEGFA/TNF	2
BP	GO:1905953	negative regulation of lipid localization	2/5	61/18670	0.000104344	0.001472271	0.000221011	IL6/TNF	2
BP	GO:0030099	myeloid cell differentiation	3/5	416/18670	0.000106231	0.001480839	0.000222298	VEGFA/TNF/CASP3	3
BP	GO:0002637	regulation of immunoglobulin production	2/5	63/18670	0.000111334	0.001515447	0.000227493	IL6/TNF	2
BP	GO:0042982	amyloid precursor protein metabolic process	2/5	63/18670	0.000111334	0.001515447	0.000227493	TNF/CASP3	2
BP	GO:0042108	positive regulation of cytokine biosynthetic process	2/5	67/18670	0.000125987	0.001694967	0.000254442	IL6/TNF	2
BP	GO:0019915	lipid storage	2/5	68/18670	0.000129791	0.001726071	0.000259111	IL6/TNF	2
BP	GO:1904951	positive regulation of establishment of protein localization	3/5	456/18670	0.000139548	0.001834741	0.000275424	IL6/TNF/MAPK8	3
BP	GO:0042531	positive regulation of tyrosine phosphorylation of STAT protein	2/5	71/18670	0.000141539	0.001840013	0.000276215	IL6/TNF	2
BP	GO:0038034	signal transduction in absence of ligand	2/5	72/18670	0.000145568	0.001850791	0.000277833	TNF/CASP3	2
BP	GO:0097192	extrinsic apoptotic signaling pathway in absence of ligand	2/5	72/18670	0.000145568	0.001850791	0.000277833	TNF/CASP3	2
BP	GO:0014015	positive regulation of gliogenesis	2/5	74/18670	0.000153793	0.001934111	0.000290341	IL6/TNF	2
BP	GO:0050769	positive regulation of neurogenesis	3/5	474/18670	0.000156543	0.001944613	0.000291917	IL6/VEGFA/TNF	3
BP	GO:0150076	neuroinflammatory response	2/5	75/18670	0.000157989	0.001944613	0.000291917	IL6/TNF	2
BP	GO:0034248	regulation of cellular amide metabolic process	3/5	483/18670	0.000165528	0.001998747	0.000300044	IL6/TNF/CASP3	3
BP	GO:0016575	histone deacetylation	2/5	77/18670	0.00016655	0.001998747	0.000300044	VEGFA/MAPK8	2
BP	GO:0048871	multicellular organismal homeostasis	3/5	485/18670	0.00016757	0.001998747	0.000300044	IL6/VEGFA/TNF	3
BP	GO:0050900	leukocyte migration	3/5	499/18670	0.000182327	0.002152572	0.000323136	IL6/VEGFA/TNF	3
BP	GO:0048708	astrocyte differentiation	2/5	81/18670	0.000184344	0.002154408	0.000323411	IL6/TNF	2
BP	GO:0032642	regulation of chemokine production	2/5	82/18670	0.000188933	0.002185951	0.000328146	IL6/TNF	2
BP	GO:0006970	response to osmotic stress	2/5	83/18670	0.000193577	0.002195769	0.00032962	TNF/CASP3	2
BP	GO:0042509	regulation of tyrosine phosphorylation of STAT protein	2/5	83/18670	0.000193577	0.002195769	0.00032962	IL6/TNF	2
BP	GO:0002718	regulation of cytokine production involved in immune response	2/5	84/18670	0.000198277	0.002227247	0.000334345	IL6/TNF	2
BP	GO:0001776	leukocyte homeostasis	2/5	86/18670	0.000207845	0.002290251	0.000343803	IL6/CASP3	2
BP	GO:0007260	tyrosine phosphorylation of STAT protein	2/5	86/18670	0.000207845	0.002290251	0.000343803	IL6/TNF	2
BP	GO:0002690	positive regulation of leukocyte chemotaxis	2/5	87/18670	0.000212712	0.002310134	0.000346788	IL6/VEGFA	2
BP	GO:0097194	execution phase of apoptosis	2/5	88/18670	0.000217636	0.002310134	0.000346788	IL6/CASP3	2
BP	GO:1901888	regulation of cell junction assembly	2/5	88/18670	0.000217636	0.002310134	0.000346788	VEGFA/TNF	2
BP	GO:1904035	regulation of epithelial cell apoptotic process	2/5	88/18670	0.000217636	0.002310134	0.000346788	IL6/TNF	2
BP	GO:0032602	chemokine production	2/5	89/18670	0.000222615	0.002320411	0.000348331	IL6/TNF	2
BP	GO:0046427	positive regulation of JAK-STAT cascade	2/5	89/18670	0.000222615	0.002320411	0.000348331	IL6/TNF	2
BP	GO:0071674	mononuclear cell migration	2/5	90/18670	0.00022765	0.002351706	0.000353029	IL6/TNF	2
BP	GO:1904894	positive regulation of STAT cascade	2/5	92/18670	0.000237887	0.002435712	0.000365639	IL6/TNF	2
BP	GO:0006476	protein deacetylation	2/5	93/18670	0.000243089	0.002467144	0.000370358	VEGFA/MAPK8	2
BP	GO:1901216	positive regulation of neuron death	2/5	94/18670	0.000248347	0.002498589	0.000375078	TNF/CASP3	2
BP	GO:0042116	macrophage activation	2/5	95/18670	0.000253661	0.002530048	0.000379801	IL6/TNF	2
BP	GO:0008585	female gonad development	2/5	96/18670	0.00025903	0.002539811	0.000381266	VEGFA/CASP3	2
BP	GO:0032755	positive regulation of interleukin-6 production	2/5	96/18670	0.00025903	0.002539811	0.000381266	IL6/TNF	2
BP	GO:0002824	positive regulation of adaptive immune response based on somatic recombination of immune receptors built from immunoglobulin superfamily domains	2/5	100/18670	0.000281063	0.002719048	0.000408173	IL6/TNF	2
BP	GO:0046545	development of primary female sexual characteristics	2/5	101/18670	0.00028671	0.002719048	0.000408173	VEGFA/CASP3	2
BP	GO:0048661	positive regulation of smooth muscle cell proliferation	2/5	101/18670	0.00028671	0.002719048	0.000408173	IL6/TNF	2
BP	GO:0050830	defense response to Gram-positive bacterium	2/5	101/18670	0.00028671	0.002719048	0.000408173	IL6/TNF	2
BP	GO:0002367	cytokine production involved in immune response	2/5	102/18670	0.000292413	0.002750586	0.000412907	IL6/TNF	2
BP	GO:0035601	protein deacylation	2/5	103/18670	0.000298171	0.002782132	0.000417643	VEGFA/MAPK8	2
BP	GO:0071887	leukocyte apoptotic process	2/5	104/18670	0.000303985	0.002791357	0.000419027	IL6/CASP3	2
BP	GO:0098732	macromolecule deacylation	2/5	104/18670	0.000303985	0.002791357	0.000419027	VEGFA/MAPK8	2
BP	GO:0002708	positive regulation of lymphocyte mediated immunity	2/5	105/18670	0.000309855	0.002800796	0.000420444	IL6/TNF	2
BP	GO:0002821	positive regulation of adaptive immune response	2/5	105/18670	0.000309855	0.002800796	0.000420444	IL6/TNF	2
BP	GO:1904019	epithelial cell apoptotic process	2/5	111/18670	0.000346235	0.00310538	0.000466167	IL6/TNF	2
BP	GO:0043200	response to amino acid	2/5	113/18670	0.000358805	0.003153024	0.000473319	TNF/CASP3	2
BP	GO:0002688	regulation of leukocyte chemotaxis	2/5	114/18670	0.000365173	0.003153024	0.000473319	IL6/VEGFA	2
BP	GO:0030218	erythrocyte differentiation	2/5	114/18670	0.000365173	0.003153024	0.000473319	VEGFA/CASP3	2
BP	GO:0042035	regulation of cytokine biosynthetic process	2/5	114/18670	0.000365173	0.003153024	0.000473319	IL6/TNF	2
BP	GO:0045446	endothelial cell differentiation	2/5	114/18670	0.000365173	0.003153024	0.000473319	VEGFA/TNF	2
BP	GO:0046660	female sex differentiation	2/5	115/18670	0.000371596	0.003184718	0.000478077	VEGFA/CASP3	2
BP	GO:0021782	glial cell development	2/5	116/18670	0.000378075	0.003216417	0.000482836	IL6/TNF	2
BP	GO:0034101	erythrocyte homeostasis	2/5	122/18670	0.000418107	0.003505432	0.000526221	VEGFA/CASP3	2
BP	GO:1905477	positive regulation of protein localization to membrane	2/5	122/18670	0.000418107	0.003505432	0.000526221	TNF/MAPK8	2
BP	GO:0042089	cytokine biosynthetic process	2/5	123/18670	0.000424972	0.003537357	0.000531014	IL6/TNF	2
BP	GO:0014013	regulation of gliogenesis	2/5	124/18670	0.000431892	0.003543967	0.000532006	IL6/TNF	2
BP	GO:0042107	cytokine metabolic process	2/5	124/18670	0.000431892	0.003543967	0.000532006	IL6/TNF	2
BP	GO:0045667	regulation of osteoblast differentiation	2/5	126/18670	0.000445898	0.003633129	0.000545391	IL6/TNF	2
BP	GO:0045727	positive regulation of translation	2/5	127/18670	0.000452984	0.003665053	0.000550183	IL6/TNF	2
BP	GO:0003158	endothelium development	2/5	132/18670	0.000489238	0.003903784	0.00058602	VEGFA/TNF	2
BP	GO:0045598	regulation of fat cell differentiation	2/5	132/18670	0.000489238	0.003903784	0.00058602	IL6/TNF	2
BP	GO:0002705	positive regulation of leukocyte mediated immunity	2/5	133/18670	0.000496654	0.003935814	0.000590829	IL6/TNF	2
BP	GO:0050921	positive regulation of chemotaxis	2/5	135/18670	0.000511651	0.004027075	0.000604528	IL6/VEGFA	2
BP	GO:0046425	regulation of JAK-STAT cascade	2/5	137/18670	0.000526867	0.00411882	0.000618301	IL6/TNF	2
BP	GO:0002700	regulation of production of molecular mediator of immune response	2/5	139/18670	0.000542303	0.004211039	0.000632144	IL6/TNF	2
BP	GO:0009411	response to UV	2/5	141/18670	0.000557959	0.004303721	0.000646057	CASP3/MAPK8	2
BP	GO:0031056	regulation of histone modification	2/5	143/18670	0.000573833	0.004396856	0.000660038	VEGFA/MAPK8	2
BP	GO:0002822	regulation of adaptive immune response based on somatic recombination of immune receptors built from immunoglobulin superfamily domains	2/5	145/18670	0.000589927	0.004490434	0.000674086	IL6/TNF	2
BP	GO:0042542	response to hydrogen peroxide	2/5	146/18670	0.000598057	0.004493191	0.0006745	IL6/CASP3	2
BP	GO:1904892	regulation of STAT cascade	2/5	146/18670	0.000598057	0.004493191	0.0006745	IL6/TNF	2
BP	GO:0035148	tube formation	2/5	148/18670	0.000614479	0.004586788	0.00068855	VEGFA/CASP3	2
BP	GO:0002706	regulation of lymphocyte mediated immunity	2/5	149/18670	0.000622772	0.004618894	0.00069337	IL6/TNF	2
BP	GO:0048754	branching morphogenesis of an epithelial tube	2/5	150/18670	0.00063112	0.004650994	0.000698189	VEGFA/TNF	2
BP	GO:0032675	regulation of interleukin-6 production	2/5	152/18670	0.00064798	0.004745018	0.000712303	IL6/TNF	2
BP	GO:0045807	positive regulation of endocytosis	2/5	153/18670	0.000656492	0.004747257	0.000712639	VEGFA/TNF	2
BP	GO:0050729	positive regulation of inflammatory response	2/5	153/18670	0.000656492	0.004747257	0.000712639	IL6/TNF	2
BP	GO:0007259	JAK-STAT cascade	2/5	156/18670	0.000682355	0.004843466	0.000727082	IL6/TNF	2
BP	GO:0030856	regulation of epithelial cell differentiation	2/5	156/18670	0.000682355	0.004843466	0.000727082	VEGFA/TNF	2
BP	GO:0042129	regulation of T cell proliferation	2/5	156/18670	0.000682355	0.004843466	0.000727082	IL6/CASP3	2
BP	GO:1905952	regulation of lipid localization	2/5	157/18670	0.000691085	0.004875523	0.000731894	IL6/TNF	2
BP	GO:0002673	regulation of acute inflammatory response	2/5	159/18670	0.000708709	0.004969557	0.00074601	IL6/TNF	2
BP	GO:0002819	regulation of adaptive immune response	2/5	160/18670	0.000717603	0.005001608	0.000750821	IL6/TNF	2
BP	GO:0032635	interleukin-6 production	2/5	161/18670	0.000726552	0.005033653	0.000755632	IL6/TNF	2
BP	GO:0097696	STAT cascade	2/5	166/18670	0.00077211	0.005317445	0.000798234	IL6/TNF	2
BP	GO:0048660	regulation of smooth muscle cell proliferation	2/5	169/18670	0.000800097	0.005477588	0.000822274	IL6/TNF	2
BP	GO:0016241	regulation of macroautophagy	2/5	171/18670	0.000819027	0.005541385	0.00083185	CASP3/MAPK8	2
BP	GO:0048659	smooth muscle cell proliferation	2/5	171/18670	0.000819027	0.005541385	0.00083185	IL6/TNF	2
BP	GO:0030324	lung development	2/5	172/18670	0.000828573	0.005541385	0.00083185	VEGFA/TNF	2
BP	GO:0032874	positive regulation of stress-activated MAPK cascade	2/5	172/18670	0.000828573	0.005541385	0.00083185	VEGFA/TNF	2
BP	GO:0001659	temperature homeostasis	2/5	173/18670	0.000838174	0.005541529	0.000831872	VEGFA/TNF	2
BP	GO:0070304	positive regulation of stress-activated protein kinase signaling cascade	2/5	173/18670	0.000838174	0.005541529	0.000831872	VEGFA/TNF	2
BP	GO:0001936	regulation of endothelial cell proliferation	2/5	176/18670	0.000867302	0.005669311	0.000851054	VEGFA/TNF	2
BP	GO:0030323	respiratory tube development	2/5	176/18670	0.000867302	0.005669311	0.000851054	VEGFA/TNF	2
BP	GO:0001959	regulation of cytokine-mediated signaling pathway	2/5	177/18670	0.000877119	0.005701276	0.000855853	IL6/TNF	2
BP	GO:1905330	regulation of morphogenesis of an epithelium	2/5	180/18670	0.000906897	0.005861899	0.000879965	VEGFA/TNF	2
BP	GO:0022408	negative regulation of cell-cell adhesion	2/5	181/18670	0.000916931	0.005893831	0.000884758	VEGFA/CASP3	2
BP	GO:0061138	morphogenesis of a branching epithelium	2/5	182/18670	0.00092702	0.005925756	0.000889551	VEGFA/TNF	2
BP	GO:0042098	T cell proliferation	2/5	184/18670	0.000947359	0.005989584	0.000899132	IL6/CASP3	2
BP	GO:0050864	regulation of B cell activation	2/5	184/18670	0.000947359	0.005989584	0.000899132	IL6/CASP3	2
BP	GO:1902275	regulation of chromatin organization	2/5	185/18670	0.000957609	0.006021488	0.000903922	VEGFA/MAPK8	2
BP	GO:1905475	regulation of protein localization to membrane	2/5	187/18670	0.000978272	0.006118168	0.000918435	TNF/MAPK8	2
BP	GO:0060759	regulation of response to cytokine stimulus	2/5	190/18670	0.001009672	0.006280594	0.000942818	IL6/TNF	2
BP	GO:0001935	endothelial cell proliferation	2/5	191/18670	0.001020247	0.006312434	0.000947597	VEGFA/TNF	2
BP	GO:0043112	receptor metabolic process	2/5	192/18670	0.001030875	0.006344268	0.000952376	VEGFA/TNF	2
BP	GO:0002377	immunoglobulin production	2/5	193/18670	0.001041557	0.006376094	0.000957154	IL6/TNF	2
BP	GO:0001763	morphogenesis of a branching structure	2/5	196/18670	0.001073928	0.006539654	0.000981707	VEGFA/TNF	2
BP	GO:0060541	respiratory system development	2/5	198/18670	0.001095777	0.006637769	0.000996435	VEGFA/TNF	2
BP	GO:0002703	regulation of leukocyte mediated immunity	2/5	201/18670	0.001128955	0.006803127	0.001021258	IL6/TNF	2
BP	GO:0030278	regulation of ossification	2/5	203/18670	0.001151342	0.006902085	0.001036113	IL6/TNF	2
BP	GO:0002573	myeloid leukocyte differentiation	2/5	204/18670	0.001162616	0.006933746	0.001040866	VEGFA/TNF	2
BP	GO:0002064	epithelial cell development	2/5	207/18670	0.001196761	0.00710078	0.001065941	VEGFA/TNF	2
BP	GO:0050670	regulation of lymphocyte proliferation	2/5	208/18670	0.00120825	0.00712358	0.001069363	IL6/CASP3	2
BP	GO:0032944	regulation of mononuclear cell proliferation	2/5	209/18670	0.001219792	0.00712358	0.001069363	IL6/CASP3	2
BP	GO:0071229	cellular response to acid chemical	2/5	209/18670	0.001219792	0.00712358	0.001069363	VEGFA/TNF	2
BP	GO:0043523	regulation of neuron apoptotic process	2/5	210/18670	0.001231388	0.00712358	0.001069363	TNF/CASP3	2
BP	GO:0097529	myeloid leukocyte migration	2/5	210/18670	0.001231388	0.00712358	0.001069363	IL6/VEGFA	2
BP	GO:0007254	JNK cascade	2/5	214/18670	0.001278308	0.007358222	0.001104587	TNF/MAPK8	2
BP	GO:0043281	regulation of cysteine-type endopeptidase activity involved in apoptotic process	2/5	215/18670	0.001290172	0.007389748	0.001109319	VEGFA/TNF	2
BP	GO:0002699	positive regulation of immune effector process	2/5	216/18670	0.001302089	0.00741198	0.001112657	IL6/TNF	2
BP	GO:0008406	gonad development	2/5	217/18670	0.00131406	0.00741198	0.001112657	VEGFA/CASP3	2
BP	GO:0050920	regulation of chemotaxis	2/5	217/18670	0.00131406	0.00741198	0.001112657	IL6/VEGFA	2
BP	GO:0010001	glial cell differentiation	2/5	218/18670	0.001326085	0.00741198	0.001112657	IL6/TNF	2
BP	GO:1903039	positive regulation of leukocyte cell-cell adhesion	2/5	218/18670	0.001326085	0.00741198	0.001112657	IL6/TNF	2
BP	GO:0002526	acute inflammatory response	2/5	220/18670	0.001350294	0.007511008	0.001127522	IL6/TNF	2
BP	GO:0070663	regulation of leukocyte proliferation	2/5	222/18670	0.001374716	0.007601177	0.001141058	IL6/CASP3	2
BP	GO:0045137	development of primary sexual characteristics	2/5	223/18670	0.001387008	0.007601177	0.001141058	VEGFA/CASP3	2
BP	GO:0045444	fat cell differentiation	2/5	223/18670	0.001387008	0.007601177	0.001141058	IL6/TNF	2
BP	GO:0030595	leukocyte chemotaxis	2/5	224/18670	0.001399352	0.007601177	0.001141058	IL6/VEGFA	2
BP	GO:0097191	extrinsic apoptotic signaling pathway	2/5	224/18670	0.001399352	0.007601177	0.001141058	TNF/CASP3	2
BP	GO:0001649	osteoblast differentiation	2/5	225/18670	0.00141175	0.007632688	0.001145789	IL6/TNF	2
BP	GO:0001894	tissue homeostasis	2/5	227/18670	0.001436706	0.007731486	0.00116062	IL6/VEGFA	2
BP	GO:0032872	regulation of stress-activated MAPK cascade	2/5	237/18670	0.001564681	0.008366763	0.001255985	VEGFA/TNF	2
BP	GO:0033002	muscle cell proliferation	2/5	239/18670	0.001590914	0.008366763	0.001255985	IL6/TNF	2
BP	GO:0051402	neuron apoptotic process	2/5	239/18670	0.001590914	0.008366763	0.001255985	TNF/CASP3	2
BP	GO:0070302	regulation of stress-activated protein kinase signaling cascade	2/5	239/18670	0.001590914	0.008366763	0.001255985	VEGFA/TNF	2
BP	GO:2000116	regulation of cysteine-type endopeptidase activity	2/5	239/18670	0.001590914	0.008366763	0.001255985	VEGFA/TNF	2
BP	GO:0034329	cell junction assembly	2/5	241/18670	0.00161736	0.008467353	0.001271085	VEGFA/TNF	2
BP	GO:0097237	cellular response to toxic substance	2/5	247/18670	0.001697967	0.008849317	0.001328424	IL6/TNF	2
BP	GO:0030072	peptide hormone secretion	2/5	250/18670	0.001738986	0.009022453	0.001354415	IL6/TNF	2
BP	GO:2000027	regulation of animal organ morphogenesis	2/5	253/18670	0.001780481	0.009196502	0.001380542	VEGFA/TNF	2
BP	GO:0022409	positive regulation of cell-cell adhesion	2/5	255/18670	0.001808408	0.009299237	0.001395964	IL6/TNF	2
BP	GO:0043406	positive regulation of MAP kinase activity	2/5	258/18670	0.001850695	0.009474575	0.001422285	VEGFA/TNF	2
BP	GO:0031334	positive regulation of protein complex assembly	2/5	268/18670	0.001995076	0.010124137	0.001519795	VEGFA/TNF	2
BP	GO:0050714	positive regulation of protein secretion	2/5	268/18670	0.001995076	0.010124137	0.001519795	IL6/TNF	2
BP	GO:0007548	sex differentiation	2/5	270/18670	0.002024584	0.010184537	0.001528862	VEGFA/CASP3	2
BP	GO:0045165	cell fate commitment	2/5	270/18670	0.002024584	0.010184537	0.001528862	IL6/CASP3	2
BP	GO:0046651	lymphocyte proliferation	2/5	272/18670	0.002054301	0.010289294	0.001544588	IL6/CASP3	2
BP	GO:0032943	mononuclear cell proliferation	2/5	274/18670	0.002084229	0.010394194	0.001560335	IL6/CASP3	2
BP	GO:0030100	regulation of endocytosis	2/5	281/18670	0.002190627	0.010877921	0.00163295	VEGFA/TNF	2
BP	GO:0002440	production of molecular mediator of immune response	2/5	286/18670	0.002268196	0.01121497	0.001683546	IL6/TNF	2
BP	GO:0002793	positive regulation of peptide secretion	2/5	288/18670	0.00229959	0.011285309	0.001694105	IL6/TNF	2
BP	GO:0007162	negative regulation of cell adhesion	2/5	289/18670	0.002315365	0.011285309	0.001694105	VEGFA/CASP3	2
BP	GO:0097193	intrinsic apoptotic signaling pathway	2/5	289/18670	0.002315365	0.011285309	0.001694105	TNF/CASP3	2
BP	GO:0034330	cell junction organization	2/5	290/18670	0.002331192	0.011285309	0.001694105	VEGFA/TNF	2
BP	GO:0042063	gliogenesis	2/5	290/18670	0.002331192	0.011285309	0.001694105	IL6/TNF	2
BP	GO:0051146	striated muscle cell differentiation	2/5	293/18670	0.002378986	0.011462565	0.001720714	VEGFA/CASP3	2
BP	GO:0016236	macroautophagy	2/5	295/18670	0.00241111	0.011462565	0.001720714	CASP3/MAPK8	2
BP	GO:0048511	rhythmic process	2/5	295/18670	0.00241111	0.011462565	0.001720714	CASP3/MAPK8	2
BP	GO:0050768	negative regulation of neurogenesis	2/5	295/18670	0.00241111	0.011462565	0.001720714	IL6/TNF	2
BP	GO:0001818	negative regulation of cytokine production	2/5	296/18670	0.00242725	0.011462565	0.001720714	IL6/TNF	2
BP	GO:0050890	cognition	2/5	296/18670	0.00242725	0.011462565	0.001720714	TNF/CASP3	2
BP	GO:0070661	leukocyte proliferation	2/5	298/18670	0.002459686	0.011568525	0.001736621	IL6/CASP3	2
BP	GO:0090305	nucleic acid phosphodiester bond hydrolysis	2/5	302/18670	0.002525183	0.011828488	0.001775645	IL6/CASP3	2
BP	GO:0060326	cell chemotaxis	2/5	304/18670	0.002558243	0.011890424	0.001784943	IL6/VEGFA	2
BP	GO:0042113	B cell activation	2/5	310/18670	0.002658669	0.011890424	0.001784943	IL6/CASP3	2
BP	GO:0001660	fever generation	1/5	10/18670	0.002675512	0.011890424	0.001784943	TNF	1
BP	GO:0010749	regulation of nitric oxide mediated signal transduction	1/5	10/18670	0.002675512	0.011890424	0.001784943	VEGFA	1
BP	GO:0032025	response to cobalt ion	1/5	10/18670	0.002675512	0.011890424	0.001784943	CASP3	1
BP	GO:0070091	glucagon secretion	1/5	10/18670	0.002675512	0.011890424	0.001784943	IL6	1
BP	GO:0090037	positive regulation of protein kinase C signaling	1/5	10/18670	0.002675512	0.011890424	0.001784943	VEGFA	1
BP	GO:0090154	positive regulation of sphingolipid biosynthetic process	1/5	10/18670	0.002675512	0.011890424	0.001784943	TNF	1
BP	GO:0097050	type B pancreatic cell apoptotic process	1/5	10/18670	0.002675512	0.011890424	0.001784943	IL6	1
BP	GO:1900222	negative regulation of amyloid-beta clearance	1/5	10/18670	0.002675512	0.011890424	0.001784943	TNF	1
BP	GO:1901033	positive regulation of response to reactive oxygen species	1/5	10/18670	0.002675512	0.011890424	0.001784943	TNF	1
BP	GO:1901725	regulation of histone deacetylase activity	1/5	10/18670	0.002675512	0.011890424	0.001784943	VEGFA	1
BP	GO:2000304	positive regulation of ceramide biosynthetic process	1/5	10/18670	0.002675512	0.011890424	0.001784943	TNF	1
BP	GO:0034612	response to tumor necrosis factor	2/5	312/18670	0.002692559	0.011890424	0.001784943	TNF/CASP3	2
BP	GO:0046879	hormone secretion	2/5	312/18670	0.002692559	0.011890424	0.001784943	IL6/TNF	2
BP	GO:1901214	regulation of neuron death	2/5	313/18670	0.002709582	0.011904685	0.001787084	TNF/CASP3	2
BP	GO:0009416	response to light stimulus	2/5	314/18670	0.002726657	0.011904685	0.001787084	CASP3/MAPK8	2
BP	GO:0050863	regulation of T cell activation	2/5	314/18670	0.002726657	0.011904685	0.001787084	IL6/CASP3	2
BP	GO:0051961	negative regulation of nervous system development	2/5	315/18670	0.002743783	0.011934424	0.001791548	IL6/TNF	2
BP	GO:0009914	hormone transport	2/5	322/18670	0.002865114	0.012074208	0.001812532	IL6/TNF	2
BP	GO:1903829	positive regulation of cellular protein localization	2/5	324/18670	0.002900245	0.012074208	0.001812532	TNF/MAPK8	2
BP	GO:0009615	response to virus	2/5	326/18670	0.002935582	0.012074208	0.001812532	IL6/TNF	2
BP	GO:0000185	activation of MAPKKK activity	1/5	11/18670	0.002942748	0.012074208	0.001812532	TNF	1
BP	GO:0002923	regulation of humoral immune response mediated by circulating immunoglobulin	1/5	11/18670	0.002942748	0.012074208	0.001812532	TNF	1
BP	GO:0031652	positive regulation of heat generation	1/5	11/18670	0.002942748	0.012074208	0.001812532	TNF	1
BP	GO:0032494	response to peptidoglycan	1/5	11/18670	0.002942748	0.012074208	0.001812532	IL6	1
BP	GO:0043117	positive regulation of vascular permeability	1/5	11/18670	0.002942748	0.012074208	0.001812532	VEGFA	1
BP	GO:0043129	surfactant homeostasis	1/5	11/18670	0.002942748	0.012074208	0.001812532	VEGFA	1
BP	GO:0046007	negative regulation of activated T cell proliferation	1/5	11/18670	0.002942748	0.012074208	0.001812532	CASP3	1
BP	GO:0046886	positive regulation of hormone biosynthetic process	1/5	11/18670	0.002942748	0.012074208	0.001812532	TNF	1
BP	GO:0051024	positive regulation of immunoglobulin secretion	1/5	11/18670	0.002942748	0.012074208	0.001812532	IL6	1
BP	GO:0060947	cardiac vascular smooth muscle cell differentiation	1/5	11/18670	0.002942748	0.012074208	0.001812532	VEGFA	1
BP	GO:0071803	positive regulation of podosome assembly	1/5	11/18670	0.002942748	0.012074208	0.001812532	TNF	1
BP	GO:2000551	regulation of T-helper 2 cell cytokine production	1/5	11/18670	0.002942748	0.012074208	0.001812532	IL6	1
BP	GO:0010506	regulation of autophagy	2/5	327/18670	0.002953328	0.012074208	0.001812532	CASP3/MAPK8	2
BP	GO:0046677	response to antibiotic	2/5	327/18670	0.002953328	0.012074208	0.001812532	IL6/CASP3	2
BP	GO:0042742	defense response to bacterium	2/5	330/18670	0.003006875	0.012194164	0.001830539	IL6/TNF	2
BP	GO:0051235	maintenance of location	2/5	330/18670	0.003006875	0.012194164	0.001830539	IL6/TNF	2
BP	GO:0071214	cellular response to abiotic stimulus	2/5	331/18670	0.003024827	0.012194164	0.001830539	CASP3/MAPK8	2
BP	GO:0104004	cellular response to environmental stimulus	2/5	331/18670	0.003024827	0.012194164	0.001830539	CASP3/MAPK8	2
BP	GO:0032147	activation of protein kinase activity	2/5	333/18670	0.003060885	0.012296682	0.001845929	VEGFA/TNF	2
BP	GO:0071902	positive regulation of protein serine/threonine kinase activity	2/5	334/18670	0.003078992	0.012297633	0.001846072	VEGFA/TNF	2
BP	GO:0043405	regulation of MAP kinase activity	2/5	337/18670	0.003133619	0.012297633	0.001846072	VEGFA/TNF	2
BP	GO:0002551	mast cell chemotaxis	1/5	12/18670	0.003209927	0.012297633	0.001846072	VEGFA	1
BP	GO:0002863	positive regulation of inflammatory response to antigenic stimulus	1/5	12/18670	0.003209927	0.012297633	0.001846072	TNF	1
BP	GO:0042368	vitamin D biosynthetic process	1/5	12/18670	0.003209927	0.012297633	0.001846072	TNF	1
BP	GO:0045080	positive regulation of chemokine biosynthetic process	1/5	12/18670	0.003209927	0.012297633	0.001846072	TNF	1
BP	GO:0045416	positive regulation of interleukin-8 biosynthetic process	1/5	12/18670	0.003209927	0.012297633	0.001846072	TNF	1
BP	GO:0051798	positive regulation of hair follicle development	1/5	12/18670	0.003209927	0.012297633	0.001846072	TNF	1
BP	GO:0071679	commissural neuron axon guidance	1/5	12/18670	0.003209927	0.012297633	0.001846072	VEGFA	1
BP	GO:0072540	T-helper 17 cell lineage commitment	1/5	12/18670	0.003209927	0.012297633	0.001846072	IL6	1
BP	GO:0097531	mast cell migration	1/5	12/18670	0.003209927	0.012297633	0.001846072	VEGFA	1
BP	GO:1902510	regulation of apoptotic DNA fragmentation	1/5	12/18670	0.003209927	0.012297633	0.001846072	IL6	1
BP	GO:2000121	regulation of removal of superoxide radicals	1/5	12/18670	0.003209927	0.012297633	0.001846072	TNF	1
BP	GO:2000341	regulation of chemokine (C-X-C motif) ligand 2 production	1/5	12/18670	0.003209927	0.012297633	0.001846072	TNF	1
BP	GO:0033044	regulation of chromosome organization	2/5	342/18670	0.00322569	0.01231724	0.001849015	VEGFA/MAPK8	2
BP	GO:0070997	neuron death	2/5	348/18670	0.003337868	0.012703662	0.001907023	TNF/CASP3	2
BP	GO:0002449	lymphocyte mediated immunity	2/5	352/18670	0.003413676	0.012894053	0.001935604	IL6/TNF	2
BP	GO:0030656	regulation of vitamin metabolic process	1/5	13/18670	0.003477048	0.012894053	0.001935604	TNF	1
BP	GO:0031650	regulation of heat generation	1/5	13/18670	0.003477048	0.012894053	0.001935604	TNF	1
BP	GO:0035745	T-helper 2 cell cytokine production	1/5	13/18670	0.003477048	0.012894053	0.001935604	IL6	1
BP	GO:0042635	positive regulation of hair cycle	1/5	13/18670	0.003477048	0.012894053	0.001935604	TNF	1
BP	GO:0045602	negative regulation of endothelial cell differentiation	1/5	13/18670	0.003477048	0.012894053	0.001935604	VEGFA	1
BP	GO:0045779	negative regulation of bone resorption	1/5	13/18670	0.003477048	0.012894053	0.001935604	IL6	1
BP	GO:0048875	chemical homeostasis within a tissue	1/5	13/18670	0.003477048	0.012894053	0.001935604	VEGFA	1
BP	GO:0006959	humoral immune response	2/5	356/18670	0.003490302	0.012901852	0.001936774	IL6/TNF	2
BP	GO:0001666	response to hypoxia	2/5	359/18670	0.003548307	0.013074496	0.001962691	VEGFA/CASP3	2
BP	GO:0002460	adaptive immune response based on somatic recombination of immune receptors built from immunoglobulin superfamily domains	2/5	361/18670	0.003587232	0.013134265	0.001971663	IL6/TNF	2
BP	GO:0031331	positive regulation of cellular catabolic process	2/5	361/18670	0.003587232	0.013134265	0.001971663	IL6/TNF	2
BP	GO:0010038	response to metal ion	2/5	364/18670	0.003646002	0.013307331	0.001997643	CASP3/MAPK8	2
BP	GO:0030198	extracellular matrix organization	2/5	368/18670	0.003725073	0.013456298	0.002020006	IL6/TNF	2
BP	GO:0050930	induction of positive chemotaxis	1/5	14/18670	0.003744112	0.013456298	0.002020006	VEGFA	1
BP	GO:0072567	chemokine (C-X-C motif) ligand 2 production	1/5	14/18670	0.003744112	0.013456298	0.002020006	TNF	1
BP	GO:1903624	regulation of DNA catabolic process	1/5	14/18670	0.003744112	0.013456298	0.002020006	IL6	1
BP	GO:0035690	cellular response to drug	2/5	369/18670	0.003744968	0.013456298	0.002020006	IL6/TNF	2
BP	GO:0036293	response to decreased oxygen levels	2/5	370/18670	0.003764914	0.013486084	0.002024477	VEGFA/CASP3	2
BP	GO:0050678	regulation of epithelial cell proliferation	2/5	378/18670	0.003926306	0.013771112	0.002067264	VEGFA/TNF	2
BP	GO:0030730	sequestering of triglyceride	1/5	15/18670	0.004011119	0.013771112	0.002067264	TNF	1
BP	GO:0032352	positive regulation of hormone metabolic process	1/5	15/18670	0.004011119	0.013771112	0.002067264	TNF	1
BP	GO:0034349	glial cell apoptotic process	1/5	15/18670	0.004011119	0.013771112	0.002067264	CASP3	1
BP	GO:0042362	fat-soluble vitamin biosynthetic process	1/5	15/18670	0.004011119	0.013771112	0.002067264	TNF	1
BP	GO:0045410	positive regulation of interleukin-6 biosynthetic process	1/5	15/18670	0.004011119	0.013771112	0.002067264	TNF	1
BP	GO:0046851	negative regulation of bone remodeling	1/5	15/18670	0.004011119	0.013771112	0.002067264	IL6	1
BP	GO:0048569	post-embryonic animal organ development	1/5	15/18670	0.004011119	0.013771112	0.002067264	VEGFA	1
BP	GO:0051044	positive regulation of membrane protein ectodomain proteolysis	1/5	15/18670	0.004011119	0.013771112	0.002067264	TNF	1
BP	GO:0060841	venous blood vessel development	1/5	15/18670	0.004011119	0.013771112	0.002067264	VEGFA	1
BP	GO:0071801	regulation of podosome assembly	1/5	15/18670	0.004011119	0.013771112	0.002067264	TNF	1
BP	GO:0090197	positive regulation of chemokine secretion	1/5	15/18670	0.004011119	0.013771112	0.002067264	TNF	1
BP	GO:1900119	positive regulation of execution phase of apoptosis	1/5	15/18670	0.004011119	0.013771112	0.002067264	IL6	1
BP	GO:2001028	positive regulation of endothelial cell chemotaxis	1/5	15/18670	0.004011119	0.013771112	0.002067264	VEGFA	1
BP	GO:0045765	regulation of angiogenesis	2/5	383/18670	0.004028822	0.013790968	0.002070245	IL6/VEGFA	2
BP	GO:0042692	muscle cell differentiation	2/5	385/18670	0.004070183	0.01389145	0.002085329	VEGFA/CASP3	2
BP	GO:0070482	response to oxygen levels	2/5	394/18670	0.004258803	0.014021885	0.002104909	VEGFA/CASP3	2
BP	GO:0001780	neutrophil homeostasis	1/5	16/18670	0.004278069	0.014021885	0.002104909	IL6	1
BP	GO:0002295	T-helper cell lineage commitment	1/5	16/18670	0.004278069	0.014021885	0.002104909	IL6	1
BP	GO:0002739	regulation of cytokine secretion involved in immune response	1/5	16/18670	0.004278069	0.014021885	0.002104909	TNF	1
BP	GO:0002830	positive regulation of type 2 immune response	1/5	16/18670	0.004278069	0.014021885	0.002104909	IL6	1
BP	GO:0030889	negative regulation of B cell proliferation	1/5	16/18670	0.004278069	0.014021885	0.002104909	CASP3	1
BP	GO:0034116	positive regulation of heterotypic cell-cell adhesion	1/5	16/18670	0.004278069	0.014021885	0.002104909	TNF	1
BP	GO:0046325	negative regulation of glucose import	1/5	16/18670	0.004278069	0.014021885	0.002104909	TNF	1
BP	GO:0070886	positive regulation of calcineurin-NFAT signaling cascade	1/5	16/18670	0.004278069	0.014021885	0.002104909	TNF	1
BP	GO:0090036	regulation of protein kinase C signaling	1/5	16/18670	0.004278069	0.014021885	0.002104909	VEGFA	1
BP	GO:0090153	regulation of sphingolipid biosynthetic process	1/5	16/18670	0.004278069	0.014021885	0.002104909	TNF	1
BP	GO:0106058	positive regulation of calcineurin-mediated signaling	1/5	16/18670	0.004278069	0.014021885	0.002104909	TNF	1
BP	GO:1905038	regulation of membrane lipid metabolic process	1/5	16/18670	0.004278069	0.014021885	0.002104909	TNF	1
BP	GO:2000303	regulation of ceramide biosynthetic process	1/5	16/18670	0.004278069	0.014021885	0.002104909	TNF	1
BP	GO:0001503	ossification	2/5	398/18670	0.004343945	0.014197582	0.002131284	IL6/TNF	2
BP	GO:1903532	positive regulation of secretion by cell	2/5	399/18670	0.004365356	0.014227371	0.002135756	IL6/TNF	2
BP	GO:0010876	lipid localization	2/5	400/18670	0.004386817	0.014257157	0.002140227	IL6/TNF	2
BP	GO:2001233	regulation of apoptotic signaling pathway	2/5	406/18670	0.004516641	0.014446483	0.002168648	TNF/MAPK8	2
BP	GO:0010715	regulation of extracellular matrix disassembly	1/5	17/18670	0.004544961	0.014446483	0.002168648	IL6	1
BP	GO:0031649	heat generation	1/5	17/18670	0.004544961	0.014446483	0.002168648	TNF	1
BP	GO:0032740	positive regulation of interleukin-17 production	1/5	17/18670	0.004544961	0.014446483	0.002168648	IL6	1
BP	GO:0032966	negative regulation of collagen biosynthetic process	1/5	17/18670	0.004544961	0.014446483	0.002168648	IL6	1
BP	GO:0043373	CD4-positive, alpha-beta T cell lineage commitment	1/5	17/18670	0.004544961	0.014446483	0.002168648	IL6	1
BP	GO:1904996	positive regulation of leukocyte adhesion to vascular endothelial cell	1/5	17/18670	0.004544961	0.014446483	0.002168648	TNF	1
BP	GO:1905331	negative regulation of morphogenesis of an epithelium	1/5	17/18670	0.004544961	0.014446483	0.002168648	TNF	1
BP	GO:0051222	positive regulation of protein transport	2/5	418/18670	0.0047817	0.014806511	0.002222694	IL6/TNF	2
BP	GO:0043588	skin development	2/5	419/18670	0.004804113	0.014806511	0.002222694	TNF/CASP3	2
BP	GO:0010713	negative regulation of collagen metabolic process	1/5	18/18670	0.004811796	0.014806511	0.002222694	IL6	1
BP	GO:0031065	positive regulation of histone deacetylation	1/5	18/18670	0.004811796	0.014806511	0.002222694	VEGFA	1
BP	GO:0048739	cardiac muscle fiber development	1/5	18/18670	0.004811796	0.014806511	0.002222694	VEGFA	1
BP	GO:0060749	mammary gland alveolus development	1/5	18/18670	0.004811796	0.014806511	0.002222694	VEGFA	1
BP	GO:0060977	coronary vasculature morphogenesis	1/5	18/18670	0.004811796	0.014806511	0.002222694	VEGFA	1
BP	GO:0061377	mammary gland lobule development	1/5	18/18670	0.004811796	0.014806511	0.002222694	VEGFA	1
BP	GO:0090190	positive regulation of branching involved in ureteric bud morphogenesis	1/5	18/18670	0.004811796	0.014806511	0.002222694	VEGFA	1
BP	GO:0090196	regulation of chemokine secretion	1/5	18/18670	0.004811796	0.014806511	0.002222694	TNF	1
BP	GO:1900221	regulation of amyloid-beta clearance	1/5	18/18670	0.004811796	0.014806511	0.002222694	TNF	1
BP	GO:2000047	regulation of cell-cell adhesion mediated by cadherin	1/5	18/18670	0.004811796	0.014806511	0.002222694	VEGFA	1
BP	GO:0043062	extracellular structure organization	2/5	422/18670	0.004871652	0.01491138	0.002238437	IL6/TNF	2
BP	GO:1901342	regulation of vasculature development	2/5	422/18670	0.004871652	0.01491138	0.002238437	IL6/VEGFA	2
BP	GO:0009896	positive regulation of catabolic process	2/5	423/18670	0.004894265	0.014913477	0.002238752	IL6/TNF	2
BP	GO:0006417	regulation of translation	2/5	424/18670	0.004916928	0.014913477	0.002238752	IL6/TNF	2
BP	GO:0052548	regulation of endopeptidase activity	2/5	425/18670	0.004939641	0.014913477	0.002238752	VEGFA/TNF	2
BP	GO:0048568	embryonic organ development	2/5	428/18670	0.005008077	0.014913477	0.002238752	VEGFA/TNF	2
BP	GO:0051047	positive regulation of secretion	2/5	428/18670	0.005008077	0.014913477	0.002238752	IL6/TNF	2
BP	GO:0048608	reproductive structure development	2/5	431/18670	0.005076962	0.014913477	0.002238752	VEGFA/CASP3	2
BP	GO:0002363	alpha-beta T cell lineage commitment	1/5	19/18670	0.005078574	0.014913477	0.002238752	IL6	1
BP	GO:0002544	chronic inflammatory response	1/5	19/18670	0.005078574	0.014913477	0.002238752	TNF	1
BP	GO:0002726	positive regulation of T cell cytokine production	1/5	19/18670	0.005078574	0.014913477	0.002238752	IL6	1
BP	GO:0002922	positive regulation of humoral immune response	1/5	19/18670	0.005078574	0.014913477	0.002238752	TNF	1
BP	GO:0030949	positive regulation of vascular endothelial growth factor receptor signaling pathway	1/5	19/18670	0.005078574	0.014913477	0.002238752	VEGFA	1
BP	GO:0036303	lymph vessel morphogenesis	1/5	19/18670	0.005078574	0.014913477	0.002238752	VEGFA	1
BP	GO:0045414	regulation of interleukin-8 biosynthetic process	1/5	19/18670	0.005078574	0.014913477	0.002238752	TNF	1
BP	GO:0071800	podosome assembly	1/5	19/18670	0.005078574	0.014913477	0.002238752	TNF	1
BP	GO:1900409	positive regulation of cellular response to oxidative stress	1/5	19/18670	0.005078574	0.014913477	0.002238752	TNF	1
BP	GO:2000010	positive regulation of protein localization to cell surface	1/5	19/18670	0.005078574	0.014913477	0.002238752	TNF	1
BP	GO:0048732	gland development	2/5	434/18670	0.005146294	0.014998142	0.002251461	VEGFA/TNF	2
BP	GO:0050673	epithelial cell proliferation	2/5	434/18670	0.005146294	0.014998142	0.002251461	VEGFA/TNF	2
BP	GO:0061458	reproductive system development	2/5	434/18670	0.005146294	0.014998142	0.002251461	VEGFA/CASP3	2
BP	GO:0060249	anatomical structure homeostasis	2/5	437/18670	0.005216073	0.015158103	0.002275474	IL6/VEGFA	2
BP	GO:0019932	second-messenger-mediated signaling	2/5	439/18670	0.005262841	0.015158103	0.002275474	VEGFA/TNF	2
BP	GO:0002374	cytokine secretion involved in immune response	1/5	20/18670	0.005345295	0.015158103	0.002275474	TNF	1
BP	GO:0030220	platelet formation	1/5	20/18670	0.005345295	0.015158103	0.002275474	CASP3	1
BP	GO:0032793	positive regulation of CREB transcription factor activity	1/5	20/18670	0.005345295	0.015158103	0.002275474	VEGFA	1
BP	GO:0034104	negative regulation of tissue remodeling	1/5	20/18670	0.005345295	0.015158103	0.002275474	IL6	1
BP	GO:0042228	interleukin-8 biosynthetic process	1/5	20/18670	0.005345295	0.015158103	0.002275474	TNF	1
BP	GO:0043369	CD4-positive or CD8-positive, alpha-beta T cell lineage commitment	1/5	20/18670	0.005345295	0.015158103	0.002275474	IL6	1
BP	GO:0051797	regulation of hair follicle development	1/5	20/18670	0.005345295	0.015158103	0.002275474	TNF	1
BP	GO:0090195	chemokine secretion	1/5	20/18670	0.005345295	0.015158103	0.002275474	TNF	1
BP	GO:1903978	regulation of microglial cell activation	1/5	20/18670	0.005345295	0.015158103	0.002275474	IL6	1
BP	GO:0009314	response to radiation	2/5	448/18670	0.005475747	0.015371716	0.002307541	CASP3/MAPK8	2
BP	GO:0052547	regulation of peptidase activity	2/5	452/18670	0.005571658	0.015371716	0.002307541	VEGFA/TNF	2
BP	GO:0010829	negative regulation of glucose transmembrane transport	1/5	21/18670	0.005611958	0.015371716	0.002307541	TNF	1
BP	GO:0010893	positive regulation of steroid biosynthetic process	1/5	21/18670	0.005611958	0.015371716	0.002307541	TNF	1
BP	GO:0031290	retinal ganglion cell axon guidance	1/5	21/18670	0.005611958	0.015371716	0.002307541	VEGFA	1
BP	GO:0032682	negative regulation of chemokine production	1/5	21/18670	0.005611958	0.015371716	0.002307541	IL6	1
BP	GO:0035162	embryonic hemopoiesis	1/5	21/18670	0.005611958	0.015371716	0.002307541	VEGFA	1
BP	GO:0035743	CD4-positive, alpha-beta T cell cytokine production	1/5	21/18670	0.005611958	0.015371716	0.002307541	IL6	1
BP	GO:0036344	platelet morphogenesis	1/5	21/18670	0.005611958	0.015371716	0.002307541	CASP3	1
BP	GO:0061213	positive regulation of mesonephros development	1/5	21/18670	0.005611958	0.015371716	0.002307541	VEGFA	1
BP	GO:1902884	positive regulation of response to oxidative stress	1/5	21/18670	0.005611958	0.015371716	0.002307541	TNF	1
BP	GO:1903055	positive regulation of extracellular matrix organization	1/5	21/18670	0.005611958	0.015371716	0.002307541	IL6	1
BP	GO:1903392	negative regulation of adherens junction organization	1/5	21/18670	0.005611958	0.015371716	0.002307541	VEGFA	1
BP	GO:2000810	regulation of bicellular tight junction assembly	1/5	21/18670	0.005611958	0.015371716	0.002307541	TNF	1
BP	GO:0016570	histone modification	2/5	454/18670	0.00561991	0.015371716	0.002307541	VEGFA/MAPK8	2
BP	GO:0002697	regulation of immune effector process	2/5	458/18670	0.005717005	0.015528536	0.002331082	IL6/TNF	2
BP	GO:0023061	signal release	2/5	462/18670	0.005814889	0.015528536	0.002331082	IL6/TNF	2
BP	GO:0002683	negative regulation of immune system process	2/5	463/18670	0.005839483	0.015528536	0.002331082	TNF/CASP3	2
BP	GO:0001819	positive regulation of cytokine production	2/5	464/18670	0.005864126	0.015528536	0.002331082	IL6/TNF	2
BP	GO:0008544	epidermis development	2/5	464/18670	0.005864126	0.015528536	0.002331082	TNF/CASP3	2
BP	GO:0042110	T cell activation	2/5	464/18670	0.005864126	0.015528536	0.002331082	IL6/CASP3	2
BP	GO:0002052	positive regulation of neuroblast proliferation	1/5	22/18670	0.005878564	0.015528536	0.002331082	VEGFA	1
BP	GO:0006925	inflammatory cell apoptotic process	1/5	22/18670	0.005878564	0.015528536	0.002331082	IL6	1
BP	GO:0031281	positive regulation of cyclase activity	1/5	22/18670	0.005878564	0.015528536	0.002331082	MAPK8	1
BP	GO:0042359	vitamin D metabolic process	1/5	22/18670	0.005878564	0.015528536	0.002331082	TNF	1
BP	GO:0051000	positive regulation of nitric-oxide synthase activity	1/5	22/18670	0.005878564	0.015528536	0.002331082	TNF	1
BP	GO:0090189	regulation of branching involved in ureteric bud morphogenesis	1/5	22/18670	0.005878564	0.015528536	0.002331082	VEGFA	1
BP	GO:0090312	positive regulation of protein deacetylation	1/5	22/18670	0.005878564	0.015528536	0.002331082	VEGFA	1
BP	GO:1901522	positive regulation of transcription from RNA polymerase II promoter involved in cellular response to chemical stimulus	1/5	22/18670	0.005878564	0.015528536	0.002331082	VEGFA	1
BP	GO:1903589	positive regulation of blood vessel endothelial cell proliferation involved in sprouting angiogenesis	1/5	22/18670	0.005878564	0.015528536	0.002331082	VEGFA	1
BP	GO:0051346	negative regulation of hydrolase activity	2/5	466/18670	0.005913559	0.015585394	0.002339617	VEGFA/TNF	2
BP	GO:0043254	regulation of protein complex assembly	2/5	467/18670	0.00593835	0.01561516	0.002344085	VEGFA/TNF	2
BP	GO:0050708	regulation of protein secretion	2/5	472/18670	0.006063038	0.015870304	0.002382387	IL6/TNF	2
BP	GO:0016569	covalent chromatin modification	2/5	474/18670	0.006113257	0.015870304	0.002382387	VEGFA/MAPK8	2
BP	GO:0007413	axonal fasciculation	1/5	23/18670	0.006145113	0.015870304	0.002382387	CASP3	1
BP	GO:0050995	negative regulation of lipid catabolic process	1/5	23/18670	0.006145113	0.015870304	0.002382387	TNF	1
BP	GO:0051043	regulation of membrane protein ectodomain proteolysis	1/5	23/18670	0.006145113	0.015870304	0.002382387	TNF	1
BP	GO:0060445	branching involved in salivary gland morphogenesis	1/5	23/18670	0.006145113	0.015870304	0.002382387	TNF	1
BP	GO:0106030	neuron projection fasciculation	1/5	23/18670	0.006145113	0.015870304	0.002382387	CASP3	1
BP	GO:1901889	negative regulation of cell junction assembly	1/5	23/18670	0.006145113	0.015870304	0.002382387	TNF	1
BP	GO:0050727	regulation of inflammatory response	2/5	485/18670	0.006392958	0.016303796	0.002447461	IL6/TNF	2
BP	GO:0051249	regulation of lymphocyte activation	2/5	485/18670	0.006392958	0.016303796	0.002447461	IL6/CASP3	2
BP	GO:0002092	positive regulation of receptor internalization	1/5	24/18670	0.006411605	0.016303796	0.002447461	VEGFA	1
BP	GO:0002861	regulation of inflammatory response to antigenic stimulus	1/5	24/18670	0.006411605	0.016303796	0.002447461	TNF	1
BP	GO:0009110	vitamin biosynthetic process	1/5	24/18670	0.006411605	0.016303796	0.002447461	TNF	1
BP	GO:0071677	positive regulation of mononuclear cell migration	1/5	24/18670	0.006411605	0.016303796	0.002447461	TNF	1
BP	GO:2001026	regulation of endothelial cell chemotaxis	1/5	24/18670	0.006411605	0.016303796	0.002447461	VEGFA	1
BP	GO:0001945	lymph vessel development	1/5	25/18670	0.00667804	0.016546248	0.002483857	VEGFA	1
BP	GO:0002053	positive regulation of mesenchymal cell proliferation	1/5	25/18670	0.00667804	0.016546248	0.002483857	VEGFA	1
BP	GO:0002719	negative regulation of cytokine production involved in immune response	1/5	25/18670	0.00667804	0.016546248	0.002483857	TNF	1
BP	GO:0019430	removal of superoxide radicals	1/5	25/18670	0.00667804	0.016546248	0.002483857	TNF	1
BP	GO:0045662	negative regulation of myoblast differentiation	1/5	25/18670	0.00667804	0.016546248	0.002483857	TNF	1
BP	GO:0045672	positive regulation of osteoclast differentiation	1/5	25/18670	0.00667804	0.016546248	0.002483857	TNF	1
BP	GO:0050901	leukocyte tethering or rolling	1/5	25/18670	0.00667804	0.016546248	0.002483857	TNF	1
BP	GO:0050927	positive regulation of positive chemotaxis	1/5	25/18670	0.00667804	0.016546248	0.002483857	VEGFA	1
BP	GO:0051894	positive regulation of focal adhesion assembly	1/5	25/18670	0.00667804	0.016546248	0.002483857	VEGFA	1
BP	GO:0061217	regulation of mesonephros development	1/5	25/18670	0.00667804	0.016546248	0.002483857	VEGFA	1
BP	GO:0006914	autophagy	2/5	496/18670	0.006678563	0.016546248	0.002483857	CASP3/MAPK8	2
BP	GO:0061919	process utilizing autophagic mechanism	2/5	496/18670	0.006678563	0.016546248	0.002483857	CASP3/MAPK8	2
BP	GO:0002791	regulation of peptide secretion	2/5	500/18670	0.006783879	0.016771257	0.002517634	IL6/TNF	2
BP	GO:0002360	T cell lineage commitment	1/5	26/18670	0.006944418	0.016879603	0.002533899	IL6	1
BP	GO:0031954	positive regulation of protein autophosphorylation	1/5	26/18670	0.006944418	0.016879603	0.002533899	VEGFA	1
BP	GO:0032800	receptor biosynthetic process	1/5	26/18670	0.006944418	0.016879603	0.002533899	TNF	1
BP	GO:0034114	regulation of heterotypic cell-cell adhesion	1/5	26/18670	0.006944418	0.016879603	0.002533899	TNF	1
BP	GO:0050926	regulation of positive chemotaxis	1/5	26/18670	0.006944418	0.016879603	0.002533899	VEGFA	1
BP	GO:0072539	T-helper 17 cell differentiation	1/5	26/18670	0.006944418	0.016879603	0.002533899	IL6	1
BP	GO:1900739	regulation of protein insertion into mitochondrial membrane involved in apoptotic signaling pathway	1/5	26/18670	0.006944418	0.016879603	0.002533899	MAPK8	1
BP	GO:1900740	positive regulation of protein insertion into mitochondrial membrane involved in apoptotic signaling pathway	1/5	26/18670	0.006944418	0.016879603	0.002533899	MAPK8	1
BP	GO:0009651	response to salt stress	1/5	27/18670	0.007210738	0.017380883	0.002609149	TNF	1
BP	GO:0046885	regulation of hormone biosynthetic process	1/5	27/18670	0.007210738	0.017380883	0.002609149	TNF	1
BP	GO:0071450	cellular response to oxygen radical	1/5	27/18670	0.007210738	0.017380883	0.002609149	TNF	1
BP	GO:0071451	cellular response to superoxide	1/5	27/18670	0.007210738	0.017380883	0.002609149	TNF	1
BP	GO:0032770	positive regulation of monooxygenase activity	1/5	28/18670	0.007477001	0.017836888	0.002677602	TNF	1
BP	GO:0042634	regulation of hair cycle	1/5	28/18670	0.007477001	0.017836888	0.002677602	TNF	1
BP	GO:0045408	regulation of interleukin-6 biosynthetic process	1/5	28/18670	0.007477001	0.017836888	0.002677602	TNF	1
BP	GO:1902932	positive regulation of alcohol biosynthetic process	1/5	28/18670	0.007477001	0.017836888	0.002677602	TNF	1
BP	GO:1904994	regulation of leukocyte adhesion to vascular endothelial cell	1/5	28/18670	0.007477001	0.017836888	0.002677602	TNF	1
BP	GO:0000303	response to superoxide	1/5	29/18670	0.007743207	0.018172193	0.002727937	TNF	1
BP	GO:0007263	nitric oxide mediated signal transduction	1/5	29/18670	0.007743207	0.018172193	0.002727937	VEGFA	1
BP	GO:0010575	positive regulation of vascular endothelial growth factor production	1/5	29/18670	0.007743207	0.018172193	0.002727937	IL6	1
BP	GO:0042226	interleukin-6 biosynthetic process	1/5	29/18670	0.007743207	0.018172193	0.002727937	TNF	1
BP	GO:0060441	epithelial tube branching involved in lung morphogenesis	1/5	29/18670	0.007743207	0.018172193	0.002727937	TNF	1
BP	GO:0070102	interleukin-6-mediated signaling pathway	1/5	29/18670	0.007743207	0.018172193	0.002727937	IL6	1
BP	GO:0070528	protein kinase C signaling	1/5	29/18670	0.007743207	0.018172193	0.002727937	VEGFA	1
BP	GO:0072538	T-helper 17 type immune response	1/5	29/18670	0.007743207	0.018172193	0.002727937	IL6	1
BP	GO:0000305	response to oxygen radical	1/5	30/18670	0.008009356	0.018533651	0.002782198	TNF	1
BP	GO:0001782	B cell homeostasis	1/5	30/18670	0.008009356	0.018533651	0.002782198	CASP3	1
BP	GO:0001844	protein insertion into mitochondrial membrane involved in apoptotic signaling pathway	1/5	30/18670	0.008009356	0.018533651	0.002782198	MAPK8	1
BP	GO:0002828	regulation of type 2 immune response	1/5	30/18670	0.008009356	0.018533651	0.002782198	IL6	1
BP	GO:0045940	positive regulation of steroid metabolic process	1/5	30/18670	0.008009356	0.018533651	0.002782198	TNF	1
BP	GO:0045948	positive regulation of translational initiation	1/5	30/18670	0.008009356	0.018533651	0.002782198	TNF	1
BP	GO:0050869	negative regulation of B cell activation	1/5	30/18670	0.008009356	0.018533651	0.002782198	CASP3	1
BP	GO:0002724	regulation of T cell cytokine production	1/5	31/18670	0.008275448	0.01895979	0.002846168	IL6	1
BP	GO:0010165	response to X-ray	1/5	31/18670	0.008275448	0.01895979	0.002846168	CASP3	1
BP	GO:0035767	endothelial cell chemotaxis	1/5	31/18670	0.008275448	0.01895979	0.002846168	VEGFA	1
BP	GO:0048710	regulation of astrocyte differentiation	1/5	31/18670	0.008275448	0.01895979	0.002846168	IL6	1
BP	GO:1903393	positive regulation of adherens junction organization	1/5	31/18670	0.008275448	0.01895979	0.002846168	VEGFA	1
BP	GO:0001569	branching involved in blood vessel morphogenesis	1/5	32/18670	0.008541483	0.019415513	0.002914579	VEGFA	1
BP	GO:0048841	regulation of axon extension involved in axon guidance	1/5	32/18670	0.008541483	0.019415513	0.002914579	VEGFA	1
BP	GO:1900745	positive regulation of p38MAPK cascade	1/5	32/18670	0.008541483	0.019415513	0.002914579	VEGFA	1
BP	GO:2000778	positive regulation of interleukin-6 secretion	1/5	32/18670	0.008541483	0.019415513	0.002914579	TNF	1
BP	GO:0010464	regulation of mesenchymal cell proliferation	1/5	33/18670	0.008807461	0.019710314	0.002958833	VEGFA	1
BP	GO:0033028	myeloid cell apoptotic process	1/5	33/18670	0.008807461	0.019710314	0.002958833	IL6	1
BP	GO:0036003	positive regulation of transcription from RNA polymerase II promoter in response to stress	1/5	33/18670	0.008807461	0.019710314	0.002958833	VEGFA	1
BP	GO:0045736	negative regulation of cyclin-dependent protein serine/threonine kinase activity	1/5	33/18670	0.008807461	0.019710314	0.002958833	CASP3	1
BP	GO:0048011	neurotrophin TRK receptor signaling pathway	1/5	33/18670	0.008807461	0.019710314	0.002958833	CASP3	1
BP	GO:0051204	protein insertion into mitochondrial membrane	1/5	33/18670	0.008807461	0.019710314	0.002958833	MAPK8	1
BP	GO:1901890	positive regulation of cell junction assembly	1/5	33/18670	0.008807461	0.019710314	0.002958833	VEGFA	1
BP	GO:1902692	regulation of neuroblast proliferation	1/5	33/18670	0.008807461	0.019710314	0.002958833	VEGFA	1
BP	GO:0007435	salivary gland morphogenesis	1/5	34/18670	0.009073382	0.019957989	0.002996014	TNF	1
BP	GO:0010574	regulation of vascular endothelial growth factor production	1/5	34/18670	0.009073382	0.019957989	0.002996014	IL6	1
BP	GO:0032660	regulation of interleukin-17 production	1/5	34/18670	0.009073382	0.019957989	0.002996014	IL6	1
BP	GO:0043368	positive T cell selection	1/5	34/18670	0.009073382	0.019957989	0.002996014	IL6	1
BP	GO:0048566	embryonic digestive tract development	1/5	34/18670	0.009073382	0.019957989	0.002996014	TNF	1
BP	GO:0070050	neuron cellular homeostasis	1/5	34/18670	0.009073382	0.019957989	0.002996014	IL6	1
BP	GO:0070884	regulation of calcineurin-NFAT signaling cascade	1/5	34/18670	0.009073382	0.019957989	0.002996014	TNF	1
BP	GO:0106056	regulation of calcineurin-mediated signaling	1/5	34/18670	0.009073382	0.019957989	0.002996014	TNF	1
BP	GO:1904030	negative regulation of cyclin-dependent protein kinase activity	1/5	34/18670	0.009073382	0.019957989	0.002996014	CASP3	1
BP	GO:0002701	negative regulation of production of molecular mediator of immune response	1/5	35/18670	0.009339245	0.020272995	0.003043301	TNF	1
BP	GO:0042092	type 2 immune response	1/5	35/18670	0.009339245	0.020272995	0.003043301	IL6	1
BP	GO:0042462	eye photoreceptor cell development	1/5	35/18670	0.009339245	0.020272995	0.003043301	VEGFA	1
BP	GO:0071312	cellular response to alkaloid	1/5	35/18670	0.009339245	0.020272995	0.003043301	CASP3	1
BP	GO:0110111	negative regulation of animal organ morphogenesis	1/5	35/18670	0.009339245	0.020272995	0.003043301	TNF	1
BP	GO:1901030	positive regulation of mitochondrial outer membrane permeabilization involved in apoptotic signaling pathway	1/5	35/18670	0.009339245	0.020272995	0.003043301	MAPK8	1
BP	GO:1905332	positive regulation of morphogenesis of an epithelium	1/5	35/18670	0.009339245	0.020272995	0.003043301	VEGFA	1
BP	GO:0010573	vascular endothelial growth factor production	1/5	36/18670	0.009605052	0.020541672	0.003083634	IL6	1
BP	GO:0030224	monocyte differentiation	1/5	36/18670	0.009605052	0.020541672	0.003083634	VEGFA	1
BP	GO:0030947	regulation of vascular endothelial growth factor receptor signaling pathway	1/5	36/18670	0.009605052	0.020541672	0.003083634	VEGFA	1
BP	GO:0090322	regulation of superoxide metabolic process	1/5	36/18670	0.009605052	0.020541672	0.003083634	TNF	1
BP	GO:0097242	amyloid-beta clearance	1/5	36/18670	0.009605052	0.020541672	0.003083634	TNF	1
BP	GO:1901099	negative regulation of signal transduction in absence of ligand	1/5	36/18670	0.009605052	0.020541672	0.003083634	TNF	1
BP	GO:1903131	mononuclear cell differentiation	1/5	36/18670	0.009605052	0.020541672	0.003083634	VEGFA	1
BP	GO:2001240	negative regulation of extrinsic apoptotic signaling pathway in absence of ligand	1/5	36/18670	0.009605052	0.020541672	0.003083634	TNF	1
BP	GO:0002714	positive regulation of B cell mediated immunity	1/5	37/18670	0.009870801	0.020614651	0.003094589	TNF	1
BP	GO:0002891	positive regulation of immunoglobulin mediated immune response	1/5	37/18670	0.009870801	0.020614651	0.003094589	TNF	1
BP	GO:0007431	salivary gland development	1/5	37/18670	0.009870801	0.020614651	0.003094589	TNF	1
BP	GO:0038083	peptidyl-tyrosine autophosphorylation	1/5	37/18670	0.009870801	0.020614651	0.003094589	VEGFA	1
BP	GO:0043029	T cell homeostasis	1/5	37/18670	0.009870801	0.020614651	0.003094589	CASP3	1
BP	GO:0043114	regulation of vascular permeability	1/5	37/18670	0.009870801	0.020614651	0.003094589	VEGFA	1
BP	GO:0043243	positive regulation of protein complex disassembly	1/5	37/18670	0.009870801	0.020614651	0.003094589	TNF	1
BP	GO:0046006	regulation of activated T cell proliferation	1/5	37/18670	0.009870801	0.020614651	0.003094589	CASP3	1
BP	GO:0048846	axon extension involved in axon guidance	1/5	37/18670	0.009870801	0.020614651	0.003094589	VEGFA	1
BP	GO:0071276	cellular response to cadmium ion	1/5	37/18670	0.009870801	0.020614651	0.003094589	MAPK8	1
BP	GO:0071542	dopaminergic neuron differentiation	1/5	37/18670	0.009870801	0.020614651	0.003094589	VEGFA	1
BP	GO:0090050	positive regulation of cell migration involved in sprouting angiogenesis	1/5	37/18670	0.009870801	0.020614651	0.003094589	VEGFA	1
BP	GO:1902284	neuron projection extension involved in neuron projection guidance	1/5	37/18670	0.009870801	0.020614651	0.003094589	VEGFA	1
BP	GO:0032350	regulation of hormone metabolic process	1/5	38/18670	0.010136493	0.021017783	0.003155105	TNF	1
BP	GO:0032620	interleukin-17 production	1/5	38/18670	0.010136493	0.021017783	0.003155105	IL6	1
BP	GO:0035329	hippo signaling	1/5	38/18670	0.010136493	0.021017783	0.003155105	CASP3	1
BP	GO:1904037	positive regulation of epithelial cell apoptotic process	1/5	38/18670	0.010136493	0.021017783	0.003155105	IL6	1
BP	GO:0002251	organ or tissue specific immune response	1/5	39/18670	0.010402129	0.021377021	0.003209033	IL6	1
BP	GO:0035886	vascular smooth muscle cell differentiation	1/5	39/18670	0.010402129	0.021377021	0.003209033	VEGFA	1
BP	GO:0038179	neurotrophin signaling pathway	1/5	39/18670	0.010402129	0.021377021	0.003209033	CASP3	1
BP	GO:0045684	positive regulation of epidermis development	1/5	39/18670	0.010402129	0.021377021	0.003209033	TNF	1
BP	GO:2000648	positive regulation of stem cell proliferation	1/5	39/18670	0.010402129	0.021377021	0.003209033	VEGFA	1
BP	GO:0002369	T cell cytokine production	1/5	40/18670	0.010667707	0.021691629	0.003256261	IL6	1
BP	GO:0042036	negative regulation of cytokine biosynthetic process	1/5	40/18670	0.010667707	0.021691629	0.003256261	IL6	1
BP	GO:0045124	regulation of bone resorption	1/5	40/18670	0.010667707	0.021691629	0.003256261	IL6	1
BP	GO:0071470	cellular response to osmotic stress	1/5	40/18670	0.010667707	0.021691629	0.003256261	CASP3	1
BP	GO:0090184	positive regulation of kidney development	1/5	40/18670	0.010667707	0.021691629	0.003256261	VEGFA	1
BP	GO:2000008	regulation of protein localization to cell surface	1/5	40/18670	0.010667707	0.021691629	0.003256261	TNF	1
BP	GO:0050798	activated T cell proliferation	1/5	41/18670	0.010933228	0.022114939	0.003319806	CASP3	1
BP	GO:1900117	regulation of execution phase of apoptosis	1/5	41/18670	0.010933228	0.022114939	0.003319806	IL6	1
BP	GO:1903053	regulation of extracellular matrix organization	1/5	41/18670	0.010933228	0.022114939	0.003319806	IL6	1
BP	GO:0002639	positive regulation of immunoglobulin production	1/5	42/18670	0.011198693	0.022533717	0.003382671	IL6	1
BP	GO:0006509	membrane protein ectodomain proteolysis	1/5	42/18670	0.011198693	0.022533717	0.003382671	TNF	1
BP	GO:1901031	regulation of response to reactive oxygen species	1/5	42/18670	0.011198693	0.022533717	0.003382671	TNF	1
BP	GO:0006775	fat-soluble vitamin metabolic process	1/5	43/18670	0.0114641	0.022751224	0.003415323	TNF	1
BP	GO:0030866	cortical actin cytoskeleton organization	1/5	43/18670	0.0114641	0.022751224	0.003415323	TNF	1
BP	GO:0031279	regulation of cyclase activity	1/5	43/18670	0.0114641	0.022751224	0.003415323	MAPK8	1
BP	GO:0033173	calcineurin-NFAT signaling cascade	1/5	43/18670	0.0114641	0.022751224	0.003415323	TNF	1
BP	GO:0034198	cellular response to amino acid starvation	1/5	43/18670	0.0114641	0.022751224	0.003415323	MAPK8	1
BP	GO:0045429	positive regulation of nitric oxide biosynthetic process	1/5	43/18670	0.0114641	0.022751224	0.003415323	TNF	1
BP	GO:0045773	positive regulation of axon extension	1/5	43/18670	0.0114641	0.022751224	0.003415323	VEGFA	1
BP	GO:0050850	positive regulation of calcium-mediated signaling	1/5	43/18670	0.0114641	0.022751224	0.003415323	TNF	1
BP	GO:0010463	mesenchymal cell proliferation	1/5	44/18670	0.01172945	0.022885285	0.003435447	VEGFA	1
BP	GO:0030225	macrophage differentiation	1/5	44/18670	0.01172945	0.022885285	0.003435447	VEGFA	1
BP	GO:0032965	regulation of collagen biosynthetic process	1/5	44/18670	0.01172945	0.022885285	0.003435447	IL6	1
BP	GO:0038084	vascular endothelial growth factor signaling pathway	1/5	44/18670	0.01172945	0.022885285	0.003435447	VEGFA	1
BP	GO:0044331	cell-cell adhesion mediated by cadherin	1/5	44/18670	0.01172945	0.022885285	0.003435447	VEGFA	1
BP	GO:0061756	leukocyte adhesion to vascular endothelial cell	1/5	44/18670	0.01172945	0.022885285	0.003435447	TNF	1
BP	GO:0070266	necroptotic process	1/5	44/18670	0.01172945	0.022885285	0.003435447	TNF	1
BP	GO:1901028	regulation of mitochondrial outer membrane permeabilization involved in apoptotic signaling pathway	1/5	44/18670	0.01172945	0.022885285	0.003435447	MAPK8	1
BP	GO:1902667	regulation of axon guidance	1/5	44/18670	0.01172945	0.022885285	0.003435447	VEGFA	1
BP	GO:1904407	positive regulation of nitric oxide metabolic process	1/5	44/18670	0.01172945	0.022885285	0.003435447	TNF	1
BP	GO:0031018	endocrine pancreas development	1/5	45/18670	0.011994743	0.023363498	0.003507235	IL6	1
BP	GO:0001754	eye photoreceptor cell differentiation	1/5	46/18670	0.01225998	0.023562785	0.003537151	VEGFA	1
BP	GO:0002437	inflammatory response to antigenic stimulus	1/5	46/18670	0.01225998	0.023562785	0.003537151	TNF	1
BP	GO:0022602	ovulation cycle process	1/5	46/18670	0.01225998	0.023562785	0.003537151	CASP3	1
BP	GO:0071354	cellular response to interleukin-6	1/5	46/18670	0.01225998	0.023562785	0.003537151	IL6	1
BP	GO:0071675	regulation of mononuclear cell migration	1/5	46/18670	0.01225998	0.023562785	0.003537151	TNF	1
BP	GO:0097720	calcineurin-mediated signaling	1/5	46/18670	0.01225998	0.023562785	0.003537151	TNF	1
BP	GO:1903587	regulation of blood vessel endothelial cell proliferation involved in sprouting angiogenesis	1/5	46/18670	0.01225998	0.023562785	0.003537151	VEGFA	1
BP	GO:1990928	response to amino acid starvation	1/5	46/18670	0.01225998	0.023562785	0.003537151	MAPK8	1
BP	GO:0031952	regulation of protein autophosphorylation	1/5	47/18670	0.012525159	0.02387415	0.003583892	VEGFA	1
BP	GO:0042461	photoreceptor cell development	1/5	47/18670	0.012525159	0.02387415	0.003583892	VEGFA	1
BP	GO:0045058	T cell selection	1/5	47/18670	0.012525159	0.02387415	0.003583892	IL6	1
BP	GO:1900744	regulation of p38MAPK cascade	1/5	47/18670	0.012525159	0.02387415	0.003583892	VEGFA	1
BP	GO:2001239	regulation of extrinsic apoptotic signaling pathway in absence of ligand	1/5	47/18670	0.012525159	0.02387415	0.003583892	TNF	1
BP	GO:0002711	positive regulation of T cell mediated immunity	1/5	48/18670	0.012790281	0.024101556	0.003618029	IL6	1
BP	GO:0007595	lactation	1/5	48/18670	0.012790281	0.024101556	0.003618029	VEGFA	1
BP	GO:0008038	neuron recognition	1/5	48/18670	0.012790281	0.024101556	0.003618029	CASP3	1
BP	GO:0030865	cortical cytoskeleton organization	1/5	48/18670	0.012790281	0.024101556	0.003618029	TNF	1
BP	GO:0035272	exocrine system development	1/5	48/18670	0.012790281	0.024101556	0.003618029	TNF	1
BP	GO:0046850	regulation of bone remodeling	1/5	48/18670	0.012790281	0.024101556	0.003618029	IL6	1
BP	GO:0072604	interleukin-6 secretion	1/5	48/18670	0.012790281	0.024101556	0.003618029	TNF	1
BP	GO:0010712	regulation of collagen metabolic process	1/5	49/18670	0.013055347	0.024362962	0.00365727	IL6	1
BP	GO:0030857	negative regulation of epithelial cell differentiation	1/5	49/18670	0.013055347	0.024362962	0.00365727	VEGFA	1
BP	GO:0032757	positive regulation of interleukin-8 production	1/5	49/18670	0.013055347	0.024362962	0.00365727	TNF	1
BP	GO:0051205	protein insertion into membrane	1/5	49/18670	0.013055347	0.024362962	0.00365727	MAPK8	1
BP	GO:0097300	programmed necrotic cell death	1/5	49/18670	0.013055347	0.024362962	0.00365727	TNF	1
BP	GO:1904707	positive regulation of vascular smooth muscle cell proliferation	1/5	49/18670	0.013055347	0.024362962	0.00365727	TNF	1
BP	GO:0010718	positive regulation of epithelial to mesenchymal transition	1/5	50/18670	0.013320355	0.024698159	0.003707589	IL6	1
BP	GO:0060425	lung morphogenesis	1/5	50/18670	0.013320355	0.024698159	0.003707589	TNF	1
BP	GO:0060976	coronary vasculature development	1/5	50/18670	0.013320355	0.024698159	0.003707589	VEGFA	1
BP	GO:0070741	response to interleukin-6	1/5	50/18670	0.013320355	0.024698159	0.003707589	IL6	1
BP	GO:0001954	positive regulation of cell-matrix adhesion	1/5	51/18670	0.013585307	0.024949524	0.003745323	VEGFA	1
BP	GO:0002712	regulation of B cell mediated immunity	1/5	51/18670	0.013585307	0.024949524	0.003745323	TNF	1
BP	GO:0002889	regulation of immunoglobulin mediated immune response	1/5	51/18670	0.013585307	0.024949524	0.003745323	TNF	1
BP	GO:0045668	negative regulation of osteoblast differentiation	1/5	51/18670	0.013585307	0.024949524	0.003745323	TNF	1
BP	GO:0048260	positive regulation of receptor-mediated endocytosis	1/5	51/18670	0.013585307	0.024949524	0.003745323	VEGFA	1
BP	GO:0050999	regulation of nitric-oxide synthase activity	1/5	51/18670	0.013585307	0.024949524	0.003745323	TNF	1
BP	GO:2000179	positive regulation of neural precursor cell proliferation	1/5	52/18670	0.013850202	0.025395694	0.0038123	VEGFA	1
BP	GO:0002043	blood vessel endothelial cell proliferation involved in sprouting angiogenesis	1/5	53/18670	0.014115039	0.025677831	0.003854653	VEGFA	1
BP	GO:0032715	negative regulation of interleukin-6 production	1/5	53/18670	0.014115039	0.025677831	0.003854653	TNF	1
BP	GO:0032964	collagen biosynthetic process	1/5	53/18670	0.014115039	0.025677831	0.003854653	IL6	1
BP	GO:0038066	p38MAPK cascade	1/5	53/18670	0.014115039	0.025677831	0.003854653	VEGFA	1
BP	GO:0045661	regulation of myoblast differentiation	1/5	53/18670	0.014115039	0.025677831	0.003854653	TNF	1
BP	GO:0002720	positive regulation of cytokine production involved in immune response	1/5	54/18670	0.01437982	0.025955463	0.00389633	IL6	1
BP	GO:0002763	positive regulation of myeloid leukocyte differentiation	1/5	54/18670	0.01437982	0.025955463	0.00389633	TNF	1
BP	GO:0050994	regulation of lipid catabolic process	1/5	54/18670	0.01437982	0.025955463	0.00389633	TNF	1
BP	GO:0051353	positive regulation of oxidoreductase activity	1/5	54/18670	0.01437982	0.025955463	0.00389633	TNF	1
BP	GO:0097345	mitochondrial outer membrane permeabilization	1/5	54/18670	0.01437982	0.025955463	0.00389633	MAPK8	1
BP	GO:0001541	ovarian follicle development	1/5	55/18670	0.014644544	0.026228696	0.003937347	VEGFA	1
BP	GO:0002090	regulation of receptor internalization	1/5	55/18670	0.014644544	0.026228696	0.003937347	VEGFA	1
BP	GO:0043030	regulation of macrophage activation	1/5	55/18670	0.014644544	0.026228696	0.003937347	IL6	1
BP	GO:0048016	inositol phosphate-mediated signaling	1/5	55/18670	0.014644544	0.026228696	0.003937347	TNF	1
BP	GO:0070830	bicellular tight junction assembly	1/5	55/18670	0.014644544	0.026228696	0.003937347	TNF	1
BP	GO:0090183	regulation of kidney development	1/5	56/18670	0.014909211	0.026579287	0.003989976	VEGFA	1
BP	GO:0120192	tight junction assembly	1/5	56/18670	0.014909211	0.026579287	0.003989976	TNF	1
BP	GO:1903078	positive regulation of protein localization to plasma membrane	1/5	56/18670	0.014909211	0.026579287	0.003989976	TNF	1
BP	GO:0048008	platelet-derived growth factor receptor signaling pathway	1/5	57/18670	0.015173821	0.026967913	0.004048315	VEGFA	1
BP	GO:1903428	positive regulation of reactive oxygen species biosynthetic process	1/5	57/18670	0.015173821	0.026967913	0.004048315	TNF	1
BP	GO:0031663	lipopolysaccharide-mediated signaling pathway	1/5	58/18670	0.015438375	0.027312232	0.004100003	TNF	1
BP	GO:0042093	T-helper cell differentiation	1/5	58/18670	0.015438375	0.027312232	0.004100003	IL6	1
BP	GO:1903749	positive regulation of establishment of protein localization to mitochondrion	1/5	58/18670	0.015438375	0.027312232	0.004100003	MAPK8	1
BP	GO:0001658	branching involved in ureteric bud morphogenesis	1/5	59/18670	0.015702871	0.027569381	0.004138605	VEGFA	1
BP	GO:0033619	membrane protein proteolysis	1/5	59/18670	0.015702871	0.027569381	0.004138605	TNF	1
BP	GO:0042130	negative regulation of T cell proliferation	1/5	59/18670	0.015702871	0.027569381	0.004138605	CASP3	1
BP	GO:0045071	negative regulation of viral genome replication	1/5	59/18670	0.015702871	0.027569381	0.004138605	TNF	1
BP	GO:2000351	regulation of endothelial cell apoptotic process	1/5	59/18670	0.015702871	0.027569381	0.004138605	TNF	1
BP	GO:0002294	CD4-positive, alpha-beta T cell differentiation involved in immune response	1/5	60/18670	0.015967311	0.027739007	0.004164069	IL6	1
BP	GO:0032515	negative regulation of phosphoprotein phosphatase activity	1/5	60/18670	0.015967311	0.027739007	0.004164069	TNF	1
BP	GO:0046324	regulation of glucose import	1/5	60/18670	0.015967311	0.027739007	0.004164069	TNF	1
BP	GO:0051893	regulation of focal adhesion assembly	1/5	60/18670	0.015967311	0.027739007	0.004164069	VEGFA	1
BP	GO:0090109	regulation of cell-substrate junction assembly	1/5	60/18670	0.015967311	0.027739007	0.004164069	VEGFA	1
BP	GO:0120193	tight junction organization	1/5	60/18670	0.015967311	0.027739007	0.004164069	TNF	1
BP	GO:1902110	positive regulation of mitochondrial membrane permeability involved in apoptotic process	1/5	60/18670	0.015967311	0.027739007	0.004164069	MAPK8	1
BP	GO:0002287	alpha-beta T cell activation involved in immune response	1/5	61/18670	0.016231693	0.027863604	0.004182773	IL6	1
BP	GO:0002293	alpha-beta T cell differentiation involved in immune response	1/5	61/18670	0.016231693	0.027863604	0.004182773	IL6	1
BP	GO:0007405	neuroblast proliferation	1/5	61/18670	0.016231693	0.027863604	0.004182773	VEGFA	1
BP	GO:0010803	regulation of tumor necrosis factor-mediated signaling pathway	1/5	61/18670	0.016231693	0.027863604	0.004182773	TNF	1
BP	GO:0030888	regulation of B cell proliferation	1/5	61/18670	0.016231693	0.027863604	0.004182773	CASP3	1
BP	GO:0034113	heterotypic cell-cell adhesion	1/5	61/18670	0.016231693	0.027863604	0.004182773	TNF	1
BP	GO:0045123	cellular extravasation	1/5	61/18670	0.016231693	0.027863604	0.004182773	TNF	1
BP	GO:0046513	ceramide biosynthetic process	1/5	61/18670	0.016231693	0.027863604	0.004182773	TNF	1
BP	GO:0002260	lymphocyte homeostasis	1/5	62/18670	0.016496019	0.028150287	0.004225808	CASP3	1
BP	GO:0045453	bone resorption	1/5	62/18670	0.016496019	0.028150287	0.004225808	IL6	1
BP	GO:0070265	necrotic cell death	1/5	62/18670	0.016496019	0.028150287	0.004225808	TNF	1
BP	GO:1902686	mitochondrial outer membrane permeabilization involved in programmed cell death	1/5	62/18670	0.016496019	0.028150287	0.004225808	MAPK8	1
BP	GO:0034394	protein localization to cell surface	1/5	63/18670	0.016760289	0.02843351	0.004268325	TNF	1
BP	GO:0046530	photoreceptor cell differentiation	1/5	63/18670	0.016760289	0.02843351	0.004268325	VEGFA	1
BP	GO:0046686	response to cadmium ion	1/5	63/18670	0.016760289	0.02843351	0.004268325	MAPK8	1
BP	GO:1904377	positive regulation of protein localization to cell periphery	1/5	63/18670	0.016760289	0.02843351	0.004268325	TNF	1
BP	GO:0032768	regulation of monooxygenase activity	1/5	64/18670	0.017024501	0.028629866	0.004297801	TNF	1
BP	GO:0035794	positive regulation of mitochondrial membrane permeability	1/5	64/18670	0.017024501	0.028629866	0.004297801	MAPK8	1
BP	GO:0043297	apical junction assembly	1/5	64/18670	0.017024501	0.028629866	0.004297801	TNF	1
BP	GO:0045669	positive regulation of osteoblast differentiation	1/5	64/18670	0.017024501	0.028629866	0.004297801	IL6	1
BP	GO:0045670	regulation of osteoclast differentiation	1/5	64/18670	0.017024501	0.028629866	0.004297801	TNF	1
BP	GO:1903672	positive regulation of sprouting angiogenesis	1/5	64/18670	0.017024501	0.028629866	0.004297801	VEGFA	1
BP	GO:0002548	monocyte chemotaxis	1/5	65/18670	0.017288656	0.028864322	0.004332997	IL6	1
BP	GO:0032729	positive regulation of interferon-gamma production	1/5	65/18670	0.017288656	0.028864322	0.004332997	TNF	1
BP	GO:0035308	negative regulation of protein dephosphorylation	1/5	65/18670	0.017288656	0.028864322	0.004332997	TNF	1
BP	GO:0060675	ureteric bud morphogenesis	1/5	65/18670	0.017288656	0.028864322	0.004332997	VEGFA	1
BP	GO:0072577	endothelial cell apoptotic process	1/5	65/18670	0.017288656	0.028864322	0.004332997	TNF	1
BP	GO:0045428	regulation of nitric oxide biosynthetic process	1/5	66/18670	0.017552755	0.02913707	0.00437394	TNF	1
BP	GO:0072171	mesonephric tubule morphogenesis	1/5	66/18670	0.017552755	0.02913707	0.00437394	VEGFA	1
BP	GO:1902108	regulation of mitochondrial membrane permeability involved in apoptotic process	1/5	66/18670	0.017552755	0.02913707	0.00437394	MAPK8	1
BP	GO:1905710	positive regulation of membrane permeability	1/5	66/18670	0.017552755	0.02913707	0.00437394	MAPK8	1
BP	GO:0048747	muscle fiber development	1/5	67/18670	0.017816797	0.02949075	0.004427033	VEGFA	1
BP	GO:1903391	regulation of adherens junction organization	1/5	67/18670	0.017816797	0.02949075	0.004427033	VEGFA	1
BP	GO:0002292	T cell differentiation involved in immune response	1/5	68/18670	0.018080782	0.029673	0.004454392	IL6	1
BP	GO:0035924	cellular response to vascular endothelial growth factor stimulus	1/5	68/18670	0.018080782	0.029673	0.004454392	VEGFA	1
BP	GO:0046323	glucose import	1/5	68/18670	0.018080782	0.029673	0.004454392	TNF	1
BP	GO:0050918	positive chemotaxis	1/5	68/18670	0.018080782	0.029673	0.004454392	VEGFA	1
BP	GO:0071230	cellular response to amino acid stimulus	1/5	68/18670	0.018080782	0.029673	0.004454392	TNF	1
BP	GO:0071242	cellular response to ammonium ion	1/5	68/18670	0.018080782	0.029673	0.004454392	CASP3	1
BP	GO:0042698	ovulation cycle	1/5	69/18670	0.018344711	0.030063499	0.004513012	CASP3	1
BP	GO:0002709	regulation of T cell mediated immunity	1/5	70/18670	0.018608582	0.030324126	0.004552137	IL6	1
BP	GO:0050766	positive regulation of phagocytosis	1/5	70/18670	0.018608582	0.030324126	0.004552137	TNF	1
BP	GO:0051966	regulation of synaptic transmission, glutamatergic	1/5	70/18670	0.018608582	0.030324126	0.004552137	TNF	1
BP	GO:0072091	regulation of stem cell proliferation	1/5	70/18670	0.018608582	0.030324126	0.004552137	VEGFA	1
BP	GO:1903747	regulation of establishment of protein localization to mitochondrion	1/5	72/18670	0.019136155	0.031139988	0.00467461	MAPK8	1
BP	GO:0006801	superoxide metabolic process	1/5	73/18670	0.019399857	0.031392495	0.004712516	TNF	1
BP	GO:0032945	negative regulation of mononuclear cell proliferation	1/5	73/18670	0.019399857	0.031392495	0.004712516	CASP3	1
BP	GO:0045685	regulation of glial cell differentiation	1/5	73/18670	0.019399857	0.031392495	0.004712516	IL6	1
BP	GO:0050672	negative regulation of lymphocyte proliferation	1/5	73/18670	0.019399857	0.031392495	0.004712516	CASP3	1
BP	GO:0032677	regulation of interleukin-8 production	1/5	74/18670	0.019663501	0.031554329	0.00473681	TNF	1
BP	GO:0043367	CD4-positive, alpha-beta T cell differentiation	1/5	74/18670	0.019663501	0.031554329	0.00473681	IL6	1
BP	GO:0043507	positive regulation of JUN kinase activity	1/5	74/18670	0.019663501	0.031554329	0.00473681	TNF	1
BP	GO:0050710	negative regulation of cytokine secretion	1/5	74/18670	0.019663501	0.031554329	0.00473681	TNF	1
BP	GO:0051145	smooth muscle cell differentiation	1/5	74/18670	0.019663501	0.031554329	0.00473681	VEGFA	1
BP	GO:0072078	nephron tubule morphogenesis	1/5	74/18670	0.019663501	0.031554329	0.00473681	VEGFA	1
BP	GO:0001960	negative regulation of cytokine-mediated signaling pathway	1/5	75/18670	0.019927089	0.03184481	0.004780415	IL6	1
BP	GO:0043242	negative regulation of protein complex disassembly	1/5	75/18670	0.019927089	0.03184481	0.004780415	TNF	1
BP	GO:1902117	positive regulation of organelle assembly	1/5	75/18670	0.019927089	0.03184481	0.004780415	TNF	1
BP	GO:0001937	negative regulation of endothelial cell proliferation	1/5	76/18670	0.020190621	0.032088665	0.004817022	TNF	1
BP	GO:0046902	regulation of mitochondrial membrane permeability	1/5	76/18670	0.020190621	0.032088665	0.004817022	MAPK8	1
BP	GO:0048844	artery morphogenesis	1/5	76/18670	0.020190621	0.032088665	0.004817022	VEGFA	1
BP	GO:0072088	nephron epithelium morphogenesis	1/5	76/18670	0.020190621	0.032088665	0.004817022	VEGFA	1
BP	GO:0006809	nitric oxide biosynthetic process	1/5	77/18670	0.020454095	0.032373992	0.004859854	TNF	1
BP	GO:0061418	regulation of transcription from RNA polymerase II promoter in response to hypoxia	1/5	77/18670	0.020454095	0.032373992	0.004859854	VEGFA	1
BP	GO:1901224	positive regulation of NIK/NF-kappaB signaling	1/5	77/18670	0.020454095	0.032373992	0.004859854	TNF	1
BP	GO:0010827	regulation of glucose transmembrane transport	1/5	78/18670	0.020717513	0.032568156	0.004889001	TNF	1
BP	GO:0031016	pancreas development	1/5	78/18670	0.020717513	0.032568156	0.004889001	IL6	1
BP	GO:0061333	renal tubule morphogenesis	1/5	78/18670	0.020717513	0.032568156	0.004889001	VEGFA	1
BP	GO:0070664	negative regulation of leukocyte proliferation	1/5	78/18670	0.020717513	0.032568156	0.004889001	CASP3	1
BP	GO:0072028	nephron morphogenesis	1/5	78/18670	0.020717513	0.032568156	0.004889001	VEGFA	1
BP	GO:0001570	vasculogenesis	1/5	79/18670	0.020980875	0.032759611	0.004917742	VEGFA	1
BP	GO:0003151	outflow tract morphogenesis	1/5	79/18670	0.020980875	0.032759611	0.004917742	VEGFA	1
BP	GO:0006446	regulation of translational initiation	1/5	79/18670	0.020980875	0.032759611	0.004917742	TNF	1
BP	GO:0043536	positive regulation of blood vessel endothelial cell migration	1/5	79/18670	0.020980875	0.032759611	0.004917742	VEGFA	1
BP	GO:0071260	cellular response to mechanical stimulus	1/5	79/18670	0.020980875	0.032759611	0.004917742	MAPK8	1
BP	GO:0022617	extracellular matrix disassembly	1/5	80/18670	0.021244179	0.033126031	0.004972747	IL6	1
BP	GO:0007045	cell-substrate adherens junction assembly	1/5	81/18670	0.021507427	0.033267504	0.004993985	VEGFA	1
BP	GO:0021766	hippocampus development	1/5	81/18670	0.021507427	0.033267504	0.004993985	CASP3	1
BP	GO:0048041	focal adhesion assembly	1/5	81/18670	0.021507427	0.033267504	0.004993985	VEGFA	1
BP	GO:0060761	negative regulation of response to cytokine stimulus	1/5	81/18670	0.021507427	0.033267504	0.004993985	IL6	1
BP	GO:0110110	positive regulation of animal organ morphogenesis	1/5	81/18670	0.021507427	0.033267504	0.004993985	VEGFA	1
BP	GO:1902930	regulation of alcohol biosynthetic process	1/5	81/18670	0.021507427	0.033267504	0.004993985	TNF	1
BP	GO:0030279	negative regulation of ossification	1/5	82/18670	0.021770618	0.033495486	0.005028208	TNF	1
BP	GO:0032637	interleukin-8 production	1/5	82/18670	0.021770618	0.033495486	0.005028208	TNF	1
BP	GO:0046209	nitric oxide metabolic process	1/5	82/18670	0.021770618	0.033495486	0.005028208	TNF	1
BP	GO:0090049	regulation of cell migration involved in sprouting angiogenesis	1/5	82/18670	0.021770618	0.033495486	0.005028208	VEGFA	1
BP	GO:0043154	negative regulation of cysteine-type endopeptidase activity involved in apoptotic process	1/5	84/18670	0.022296831	0.034168786	0.005129281	VEGFA	1
BP	GO:0045445	myoblast differentiation	1/5	84/18670	0.022296831	0.034168786	0.005129281	TNF	1
BP	GO:0046889	positive regulation of lipid biosynthetic process	1/5	84/18670	0.022296831	0.034168786	0.005129281	TNF	1
BP	GO:0045682	regulation of epidermis development	1/5	85/18670	0.022559852	0.034299276	0.00514887	TNF	1
BP	GO:0050772	positive regulation of axonogenesis	1/5	85/18670	0.022559852	0.034299276	0.00514887	VEGFA	1
BP	GO:1903901	negative regulation of viral life cycle	1/5	85/18670	0.022559852	0.034299276	0.00514887	TNF	1
BP	GO:1904705	regulation of vascular smooth muscle cell proliferation	1/5	85/18670	0.022559852	0.034299276	0.00514887	TNF	1
BP	GO:1990874	vascular smooth muscle cell proliferation	1/5	85/18670	0.022559852	0.034299276	0.00514887	TNF	1
BP	GO:2001057	reactive nitrogen species metabolic process	1/5	85/18670	0.022559852	0.034299276	0.00514887	TNF	1
BP	GO:0001942	hair follicle development	1/5	86/18670	0.022822817	0.034472584	0.005174886	TNF	1
BP	GO:0006919	activation of cysteine-type endopeptidase activity involved in apoptotic process	1/5	86/18670	0.022822817	0.034472584	0.005174886	TNF	1
BP	GO:0008625	extrinsic apoptotic signaling pathway via death domain receptors	1/5	86/18670	0.022822817	0.034472584	0.005174886	TNF	1
BP	GO:0042446	hormone biosynthetic process	1/5	86/18670	0.022822817	0.034472584	0.005174886	TNF	1
BP	GO:0090559	regulation of membrane permeability	1/5	86/18670	0.022822817	0.034472584	0.005174886	MAPK8	1
BP	GO:0014068	positive regulation of phosphatidylinositol 3-kinase signaling	1/5	87/18670	0.023085725	0.034767444	0.00521915	TNF	1
BP	GO:0051781	positive regulation of cell division	1/5	87/18670	0.023085725	0.034767444	0.00521915	VEGFA	1
BP	GO:0009791	post-embryonic development	1/5	88/18670	0.023348577	0.034767444	0.00521915	VEGFA	1
BP	GO:0022404	molting cycle process	1/5	88/18670	0.023348577	0.034767444	0.00521915	TNF	1
BP	GO:0022405	hair cycle process	1/5	88/18670	0.023348577	0.034767444	0.00521915	TNF	1
BP	GO:0034103	regulation of tissue remodeling	1/5	88/18670	0.023348577	0.034767444	0.00521915	IL6	1
BP	GO:0043506	regulation of JUN kinase activity	1/5	88/18670	0.023348577	0.034767444	0.00521915	TNF	1
BP	GO:0050829	defense response to Gram-negative bacterium	1/5	88/18670	0.023348577	0.034767444	0.00521915	IL6	1
BP	GO:0098773	skin epidermis development	1/5	88/18670	0.023348577	0.034767444	0.00521915	TNF	1
BP	GO:1900407	regulation of cellular response to oxidative stress	1/5	88/18670	0.023348577	0.034767444	0.00521915	TNF	1
BP	GO:2000177	regulation of neural precursor cell proliferation	1/5	88/18670	0.023348577	0.034767444	0.00521915	VEGFA	1
BP	GO:0055013	cardiac muscle cell development	1/5	89/18670	0.023611372	0.03511357	0.005271109	VEGFA	1
BP	GO:0001843	neural tube closure	1/5	90/18670	0.023874111	0.035232584	0.005288975	CASP3	1
BP	GO:0010717	regulation of epithelial to mesenchymal transition	1/5	90/18670	0.023874111	0.035232584	0.005288975	IL6	1
BP	GO:0031058	positive regulation of histone modification	1/5	90/18670	0.023874111	0.035232584	0.005288975	VEGFA	1
BP	GO:0034333	adherens junction assembly	1/5	90/18670	0.023874111	0.035232584	0.005288975	VEGFA	1
BP	GO:0045778	positive regulation of ossification	1/5	90/18670	0.023874111	0.035232584	0.005288975	IL6	1
BP	GO:0046849	bone remodeling	1/5	90/18670	0.023874111	0.035232584	0.005288975	IL6	1
BP	GO:0045639	positive regulation of myeloid cell differentiation	1/5	91/18670	0.024136792	0.035529604	0.005333562	TNF	1
BP	GO:0060606	tube closure	1/5	91/18670	0.024136792	0.035529604	0.005333562	CASP3	1
BP	GO:0006672	ceramide metabolic process	1/5	92/18670	0.024399418	0.035734337	0.005364296	TNF	1
BP	GO:0035710	CD4-positive, alpha-beta T cell activation	1/5	92/18670	0.024399418	0.035734337	0.005364296	IL6	1
BP	GO:0045833	negative regulation of lipid metabolic process	1/5	92/18670	0.024399418	0.035734337	0.005364296	TNF	1
BP	GO:2000117	negative regulation of cysteine-type endopeptidase activity	1/5	92/18670	0.024399418	0.035734337	0.005364296	VEGFA	1
BP	GO:0007589	body fluid secretion	1/5	93/18670	0.024661987	0.035982243	0.00540151	VEGFA	1
BP	GO:0035249	synaptic transmission, glutamatergic	1/5	93/18670	0.024661987	0.035982243	0.00540151	TNF	1
BP	GO:0072080	nephron tubule development	1/5	93/18670	0.024661987	0.035982243	0.00540151	VEGFA	1
BP	GO:0060993	kidney morphogenesis	1/5	94/18670	0.024924499	0.036319452	0.005452131	VEGFA	1
BP	GO:0002702	positive regulation of production of molecular mediator of immune response	1/5	95/18670	0.025186954	0.036335793	0.005454584	IL6	1
BP	GO:0042100	B cell proliferation	1/5	95/18670	0.025186954	0.036335793	0.005454584	CASP3	1
BP	GO:0042102	positive regulation of T cell proliferation	1/5	95/18670	0.025186954	0.036335793	0.005454584	IL6	1
BP	GO:0045069	regulation of viral genome replication	1/5	95/18670	0.025186954	0.036335793	0.005454584	TNF	1
BP	GO:0050810	regulation of steroid biosynthetic process	1/5	95/18670	0.025186954	0.036335793	0.005454584	TNF	1
BP	GO:0055006	cardiac cell development	1/5	95/18670	0.025186954	0.036335793	0.005454584	VEGFA	1
BP	GO:0061326	renal tubule development	1/5	95/18670	0.025186954	0.036335793	0.005454584	VEGFA	1
BP	GO:1903076	regulation of protein localization to plasma membrane	1/5	95/18670	0.025186954	0.036335793	0.005454584	TNF	1
BP	GO:0030516	regulation of axon extension	1/5	96/18670	0.025449354	0.036623013	0.0054977	VEGFA	1
BP	GO:0048010	vascular endothelial growth factor receptor signaling pathway	1/5	96/18670	0.025449354	0.036623013	0.0054977	VEGFA	1
BP	GO:0001657	ureteric bud development	1/5	97/18670	0.025711696	0.03672646	0.005513229	VEGFA	1
BP	GO:0007044	cell-substrate junction assembly	1/5	97/18670	0.025711696	0.03672646	0.005513229	VEGFA	1
BP	GO:0014020	primary neural tube formation	1/5	97/18670	0.025711696	0.03672646	0.005513229	CASP3	1
BP	GO:0030316	osteoclast differentiation	1/5	97/18670	0.025711696	0.03672646	0.005513229	TNF	1
BP	GO:0120162	positive regulation of cold-induced thermogenesis	1/5	97/18670	0.025711696	0.03672646	0.005513229	VEGFA	1
BP	GO:1902882	regulation of response to oxidative stress	1/5	97/18670	0.025711696	0.03672646	0.005513229	TNF	1
BP	GO:0002042	cell migration involved in sprouting angiogenesis	1/5	98/18670	0.025973983	0.036873494	0.005535301	VEGFA	1
BP	GO:0050764	regulation of phagocytosis	1/5	98/18670	0.025973983	0.036873494	0.005535301	TNF	1
BP	GO:0050848	regulation of calcium-mediated signaling	1/5	98/18670	0.025973983	0.036873494	0.005535301	TNF	1
BP	GO:0072163	mesonephric epithelium development	1/5	98/18670	0.025973983	0.036873494	0.005535301	VEGFA	1
BP	GO:0072164	mesonephric tubule development	1/5	98/18670	0.025973983	0.036873494	0.005535301	VEGFA	1
BP	GO:0048525	negative regulation of viral process	1/5	99/18670	0.026236212	0.037154587	0.005577498	TNF	1
BP	GO:0070301	cellular response to hydrogen peroxide	1/5	99/18670	0.026236212	0.037154587	0.005577498	IL6	1
BP	GO:0060840	artery development	1/5	100/18670	0.026498386	0.037434227	0.005619476	VEGFA	1
BP	GO:0070498	interleukin-1-mediated signaling pathway	1/5	100/18670	0.026498386	0.037434227	0.005619476	IL6	1
BP	GO:0032649	regulation of interferon-gamma production	1/5	101/18670	0.026760502	0.037666546	0.005654351	TNF	1
BP	GO:0046632	alpha-beta T cell differentiation	1/5	101/18670	0.026760502	0.037666546	0.005654351	IL6	1
BP	GO:1903426	regulation of reactive oxygen species biosynthetic process	1/5	101/18670	0.026760502	0.037666546	0.005654351	TNF	1
BP	GO:0000079	regulation of cyclin-dependent protein serine/threonine kinase activity	1/5	102/18670	0.027022563	0.037805447	0.005675202	CASP3	1
BP	GO:0001823	mesonephros development	1/5	102/18670	0.027022563	0.037805447	0.005675202	VEGFA	1
BP	GO:0030148	sphingolipid biosynthetic process	1/5	102/18670	0.027022563	0.037805447	0.005675202	TNF	1
BP	GO:0098869	cellular oxidant detoxification	1/5	102/18670	0.027022563	0.037805447	0.005675202	TNF	1
BP	GO:2000379	positive regulation of reactive oxygen species metabolic process	1/5	102/18670	0.027022563	0.037805447	0.005675202	TNF	1
BP	GO:0032091	negative regulation of protein binding	1/5	103/18670	0.027284566	0.038034028	0.005709516	MAPK8	1
BP	GO:0048259	regulation of receptor-mediated endocytosis	1/5	103/18670	0.027284566	0.038034028	0.005709516	VEGFA	1
BP	GO:1905269	positive regulation of chromatin organization	1/5	103/18670	0.027284566	0.038034028	0.005709516	VEGFA	1
BP	GO:0008630	intrinsic apoptotic signaling pathway in response to DNA damage	1/5	104/18670	0.027546514	0.038260884	0.005743571	TNF	1
BP	GO:0010923	negative regulation of phosphatase activity	1/5	104/18670	0.027546514	0.038260884	0.005743571	TNF	1
BP	GO:2001237	negative regulation of extrinsic apoptotic signaling pathway	1/5	104/18670	0.027546514	0.038260884	0.005743571	TNF	1
BP	GO:0001841	neural tube formation	1/5	105/18670	0.027808405	0.038578326	0.005791224	CASP3	1
BP	GO:0002286	T cell activation involved in immune response	1/5	106/18670	0.028070239	0.038755688	0.005817849	IL6	1
BP	GO:0002456	T cell mediated immunity	1/5	106/18670	0.028070239	0.038755688	0.005817849	IL6	1
BP	GO:0042136	neurotransmitter biosynthetic process	1/5	106/18670	0.028070239	0.038755688	0.005817849	TNF	1
BP	GO:1904029	regulation of cyclin-dependent protein kinase activity	1/5	106/18670	0.028070239	0.038755688	0.005817849	CASP3	1
BP	GO:0051341	regulation of oxidoreductase activity	1/5	107/18670	0.028332017	0.039070494	0.005865106	TNF	1
BP	GO:1904659	glucose transmembrane transport	1/5	108/18670	0.028593739	0.039384472	0.005912239	TNF	1
BP	GO:0021761	limbic system development	1/5	109/18670	0.028855404	0.039650478	0.005952171	CASP3	1
BP	GO:0072009	nephron epithelium development	1/5	109/18670	0.028855404	0.039650478	0.005952171	VEGFA	1
BP	GO:0061387	regulation of extent of cell growth	1/5	110/18670	0.029117013	0.039962496	0.00599901	VEGFA	1
BP	GO:0031623	receptor internalization	1/5	111/18670	0.029378566	0.04020346	0.006035183	VEGFA	1
BP	GO:0035305	negative regulation of dephosphorylation	1/5	111/18670	0.029378566	0.04020346	0.006035183	TNF	1
BP	GO:0001938	positive regulation of endothelial cell proliferation	1/5	112/18670	0.029640062	0.04020346	0.006035183	VEGFA	1
BP	GO:0008645	hexose transmembrane transport	1/5	112/18670	0.029640062	0.04020346	0.006035183	TNF	1
BP	GO:0042303	molting cycle	1/5	112/18670	0.029640062	0.04020346	0.006035183	TNF	1
BP	GO:0042633	hair cycle	1/5	112/18670	0.029640062	0.04020346	0.006035183	TNF	1
BP	GO:0043279	response to alkaloid	1/5	112/18670	0.029640062	0.04020346	0.006035183	CASP3	1
BP	GO:0048593	camera-type eye morphogenesis	1/5	112/18670	0.029640062	0.04020346	0.006035183	VEGFA	1
BP	GO:0050868	negative regulation of T cell activation	1/5	112/18670	0.029640062	0.04020346	0.006035183	CASP3	1
BP	GO:1990748	cellular detoxification	1/5	112/18670	0.029640062	0.04020346	0.006035183	TNF	1
BP	GO:0032609	interferon-gamma production	1/5	113/18670	0.029901502	0.040463202	0.006074174	TNF	1
BP	GO:0043244	regulation of protein complex disassembly	1/5	113/18670	0.029901502	0.040463202	0.006074174	TNF	1
BP	GO:0015749	monosaccharide transmembrane transport	1/5	114/18670	0.030162885	0.040721655	0.006112972	TNF	1
BP	GO:0042752	regulation of circadian rhythm	1/5	114/18670	0.030162885	0.040721655	0.006112972	MAPK8	1
BP	GO:0032963	collagen metabolic process	1/5	115/18670	0.030424212	0.040978828	0.006151578	IL6	1
BP	GO:1904375	regulation of protein localization to cell periphery	1/5	115/18670	0.030424212	0.040978828	0.006151578	TNF	1
BP	GO:0034219	carbohydrate transmembrane transport	1/5	116/18670	0.030685483	0.041282679	0.006197191	TNF	1
BP	GO:0002761	regulation of myeloid leukocyte differentiation	1/5	117/18670	0.030946697	0.041441353	0.00622101	TNF	1
BP	GO:0010822	positive regulation of mitochondrion organization	1/5	117/18670	0.030946697	0.041441353	0.00622101	MAPK8	1
BP	GO:0043666	regulation of phosphoprotein phosphatase activity	1/5	117/18670	0.030946697	0.041441353	0.00622101	TNF	1
BP	GO:1901222	regulation of NIK/NF-kappaB signaling	1/5	117/18670	0.030946697	0.041441353	0.00622101	TNF	1
BP	GO:0001952	regulation of cell-matrix adhesion	1/5	119/18670	0.031468957	0.042092004	0.006318683	VEGFA	1
BP	GO:0002698	negative regulation of immune effector process	1/5	120/18670	0.031730003	0.042294485	0.006349079	TNF	1
BP	GO:0022612	gland morphogenesis	1/5	120/18670	0.031730003	0.042294485	0.006349079	TNF	1
BP	GO:0072089	stem cell proliferation	1/5	120/18670	0.031730003	0.042294485	0.006349079	VEGFA	1
BP	GO:0010811	positive regulation of cell-substrate adhesion	1/5	121/18670	0.031990992	0.042495497	0.006379254	VEGFA	1
BP	GO:0043618	regulation of transcription from RNA polymerase II promoter in response to stress	1/5	121/18670	0.031990992	0.042495497	0.006379254	VEGFA	1
BP	GO:0048675	axon extension	1/5	121/18670	0.031990992	0.042495497	0.006379254	VEGFA	1
BP	GO:0019079	viral genome replication	1/5	122/18670	0.032251925	0.04274396	0.006416552	TNF	1
BP	GO:1903409	reactive oxygen species biosynthetic process	1/5	122/18670	0.032251925	0.04274396	0.006416552	TNF	1
BP	GO:0001838	embryonic epithelial tube formation	1/5	124/18670	0.032773622	0.043138886	0.006475837	CASP3	1
BP	GO:0007043	cell-cell junction assembly	1/5	124/18670	0.032773622	0.043138886	0.006475837	TNF	1
BP	GO:0008637	apoptotic mitochondrial changes	1/5	124/18670	0.032773622	0.043138886	0.006475837	MAPK8	1
BP	GO:0014066	regulation of phosphatidylinositol 3-kinase signaling	1/5	124/18670	0.032773622	0.043138886	0.006475837	TNF	1
BP	GO:0019218	regulation of steroid metabolic process	1/5	124/18670	0.032773622	0.043138886	0.006475837	TNF	1
BP	GO:0051101	regulation of DNA binding	1/5	124/18670	0.032773622	0.043138886	0.006475837	MAPK8	1
BP	GO:0018107	peptidyl-threonine phosphorylation	1/5	126/18670	0.033295094	0.043775482	0.0065714	MAPK8	1
BP	GO:0035270	endocrine system development	1/5	127/18670	0.033555746	0.044018138	0.006607827	IL6	1
BP	GO:0043620	regulation of DNA-templated transcription in response to stress	1/5	127/18670	0.033555746	0.044018138	0.006607827	VEGFA	1
BP	GO:0002576	platelet degranulation	1/5	128/18670	0.033816341	0.044209612	0.00663657	VEGFA	1
BP	GO:0010595	positive regulation of endothelial cell migration	1/5	128/18670	0.033816341	0.044209612	0.00663657	VEGFA	1
BP	GO:0034763	negative regulation of transmembrane transport	1/5	128/18670	0.033816341	0.044209612	0.00663657	TNF	1
BP	GO:1903038	negative regulation of leukocyte cell-cell adhesion	1/5	129/18670	0.034076881	0.044499944	0.006680154	CASP3	1
BP	GO:0050671	positive regulation of lymphocyte proliferation	1/5	130/18670	0.034337364	0.044789549	0.006723628	IL6	1
BP	GO:0032946	positive regulation of mononuclear cell proliferation	1/5	131/18670	0.03459779	0.04502772	0.006759381	IL6	1
BP	GO:0098754	detoxification	1/5	131/18670	0.03459779	0.04502772	0.006759381	TNF	1
BP	GO:0043280	positive regulation of cysteine-type endopeptidase activity involved in apoptotic process	1/5	132/18670	0.034858161	0.045214005	0.006787345	TNF	1
BP	GO:0055007	cardiac muscle cell differentiation	1/5	132/18670	0.034858161	0.045214005	0.006787345	VEGFA	1
BP	GO:0072175	epithelial tube formation	1/5	132/18670	0.034858161	0.045214005	0.006787345	CASP3	1
BP	GO:0002920	regulation of humoral immune response	1/5	134/18670	0.035378734	0.045582622	0.006842681	TNF	1
BP	GO:0006766	vitamin metabolic process	1/5	134/18670	0.035378734	0.045582622	0.006842681	TNF	1
BP	GO:0007006	mitochondrial membrane organization	1/5	134/18670	0.035378734	0.045582622	0.006842681	MAPK8	1
BP	GO:0018210	peptidyl-threonine modification	1/5	134/18670	0.035378734	0.045582622	0.006842681	MAPK8	1
BP	GO:0032355	response to estradiol	1/5	134/18670	0.035378734	0.045582622	0.006842681	CASP3	1
BP	GO:0048565	digestive tract development	1/5	134/18670	0.035378734	0.045582622	0.006842681	TNF	1
BP	GO:0007498	mesoderm development	1/5	135/18670	0.035638936	0.045815832	0.006877689	VEGFA	1
BP	GO:0060359	response to ammonium ion	1/5	135/18670	0.035638936	0.045815832	0.006877689	CASP3	1
BP	GO:0072655	establishment of protein localization to mitochondrion	1/5	137/18670	0.036159172	0.046381554	0.006962613	MAPK8	1
BP	GO:1903670	regulation of sprouting angiogenesis	1/5	137/18670	0.036159172	0.046381554	0.006962613	VEGFA	1
BP	GO:0046631	alpha-beta T cell activation	1/5	138/18670	0.036419205	0.046663367	0.007004918	IL6	1
BP	GO:0035304	regulation of protein dephosphorylation	1/5	139/18670	0.036679183	0.046840855	0.007031562	TNF	1
BP	GO:0050715	positive regulation of cytokine secretion	1/5	139/18670	0.036679183	0.046840855	0.007031562	TNF	1
BP	GO:0070665	positive regulation of leukocyte proliferation	1/5	139/18670	0.036679183	0.046840855	0.007031562	IL6	1
BP	GO:0001837	epithelial to mesenchymal transition	1/5	140/18670	0.036939104	0.0470171	0.007058019	IL6	1
BP	GO:0046330	positive regulation of JNK cascade	1/5	140/18670	0.036939104	0.0470171	0.007058019	TNF	1
BP	GO:0072073	kidney epithelium development	1/5	140/18670	0.036939104	0.0470171	0.007058019	VEGFA	1
BP	GO:0050709	negative regulation of protein secretion	1/5	141/18670	0.03719897	0.047243916	0.007092068	TNF	1
BP	GO:0070585	protein localization to mitochondrion	1/5	141/18670	0.03719897	0.047243916	0.007092068	MAPK8	1
BP	GO:0034332	adherens junction organization	1/5	142/18670	0.037458779	0.047365909	0.007110381	VEGFA	1
BP	GO:0046467	membrane lipid biosynthetic process	1/5	142/18670	0.037458779	0.047365909	0.007110381	TNF	1
BP	GO:0050871	positive regulation of B cell activation	1/5	142/18670	0.037458779	0.047365909	0.007110381	IL6	1
BP	GO:0072006	nephron development	1/5	142/18670	0.037458779	0.047365909	0.007110381	VEGFA	1
BP	GO:0030879	mammary gland development	1/5	143/18670	0.037718532	0.047538498	0.007136289	VEGFA	1
BP	GO:0106106	cold-induced thermogenesis	1/5	143/18670	0.037718532	0.047538498	0.007136289	VEGFA	1
BP	GO:0120161	regulation of cold-induced thermogenesis	1/5	143/18670	0.037718532	0.047538498	0.007136289	VEGFA	1
BP	GO:1902107	positive regulation of leukocyte differentiation	1/5	144/18670	0.037978229	0.047813722	0.007177605	TNF	1
BP	GO:0007605	sensory perception of sound	1/5	145/18670	0.03823787	0.048036065	0.007210982	CASP3	1
BP	GO:0071901	negative regulation of protein serine/threonine kinase activity	1/5	145/18670	0.03823787	0.048036065	0.007210982	CASP3	1
BP	GO:0045834	positive regulation of lipid metabolic process	1/5	146/18670	0.038497455	0.048205146	0.007236364	TNF	1
BP	GO:0051250	negative regulation of lymphocyte activation	1/5	146/18670	0.038497455	0.048205146	0.007236364	CASP3	1
BP	GO:0055123	digestive system development	1/5	146/18670	0.038497455	0.048205146	0.007236364	TNF	1
BP	GO:0010212	response to ionizing radiation	1/5	147/18670	0.038756984	0.048373064	0.007261571	CASP3	1
BP	GO:0061351	neural precursor cell proliferation	1/5	147/18670	0.038756984	0.048373064	0.007261571	VEGFA	1
BP	GO:0071236	cellular response to antibiotic	1/5	147/18670	0.038756984	0.048373064	0.007261571	IL6	1
BP	GO:0002792	negative regulation of peptide secretion	1/5	148/18670	0.039016457	0.048539828	0.007286605	TNF	1
BP	GO:0008643	carbohydrate transport	1/5	148/18670	0.039016457	0.048539828	0.007286605	TNF	1
BP	GO:0014065	phosphatidylinositol 3-kinase signaling	1/5	148/18670	0.039016457	0.048539828	0.007286605	TNF	1
BP	GO:0009267	cellular response to starvation	1/5	149/18670	0.039275873	0.048601268	0.007295828	MAPK8	1
BP	GO:0048592	eye morphogenesis	1/5	149/18670	0.039275873	0.048601268	0.007295828	VEGFA	1
BP	GO:0051092	positive regulation of NF-kappaB transcription factor activity	1/5	149/18670	0.039275873	0.048601268	0.007295828	TNF	1
BP	GO:1903900	regulation of viral life cycle	1/5	149/18670	0.039275873	0.048601268	0.007295828	TNF	1
BP	GO:2001056	positive regulation of cysteine-type endopeptidase activity	1/5	149/18670	0.039275873	0.048601268	0.007295828	TNF	1
BP	GO:0002455	humoral immune response mediated by circulating immunoglobulin	1/5	150/18670	0.039535234	0.048713808	0.007312722	TNF	1
BP	GO:0008360	regulation of cell shape	1/5	150/18670	0.039535234	0.048713808	0.007312722	VEGFA	1
BP	GO:0016331	morphogenesis of embryonic epithelium	1/5	150/18670	0.039535234	0.048713808	0.007312722	CASP3	1
BP	GO:0050777	negative regulation of immune response	1/5	150/18670	0.039535234	0.048713808	0.007312722	TNF	1
BP	GO:0000187	activation of MAPK activity	1/5	152/18670	0.040053788	0.049300247	0.007400756	TNF	1
BP	GO:0030168	platelet activation	1/5	153/18670	0.04031298	0.049461419	0.00742495	IL6	1
BP	GO:0042133	neurotransmitter metabolic process	1/5	153/18670	0.04031298	0.049461419	0.00742495	TNF	1
BP	GO:0062013	positive regulation of small molecule metabolic process	1/5	153/18670	0.04031298	0.049461419	0.00742495	TNF	1
BP	GO:0010770	positive regulation of cell morphogenesis involved in differentiation	1/5	154/18670	0.040572117	0.04967401	0.007456864	VEGFA	1
BP	GO:1990845	adaptive thermogenesis	1/5	154/18670	0.040572117	0.04967401	0.007456864	VEGFA	1
BP	GO:2001236	regulation of extrinsic apoptotic signaling pathway	1/5	155/18670	0.040831198	0.049938368	0.007496548	TNF	1
CC	GO:0045121	membrane raft	2/5	315/19717	0.002464537	0.01423436	0.007491769	TNF/CASP3	2
CC	GO:0098857	membrane microdomain	2/5	316/19717	0.002479981	0.01423436	0.007491769	TNF/CASP3	2
CC	GO:0098589	membrane region	2/5	328/19717	0.002668943	0.01423436	0.007491769	TNF/CASP3	2
CC	GO:0001891	phagocytic cup	1/5	27/19717	0.006828848	0.027315392	0.014376522	TNF	1
MF	GO:0005126	cytokine receptor binding	4/5	286/17697	3.30E-07	1.19E-05	2.43E-06	IL6/VEGFA/TNF/CASP3	4
MF	GO:0005125	cytokine activity	3/5	220/17697	1.86E-05	0.000334924	6.86E-05	IL6/VEGFA/TNF	3
MF	GO:0032813	tumor necrosis factor receptor superfamily binding	2/5	46/17697	6.58E-05	0.000789252	0.000161543	TNF/CASP3	2
MF	GO:0048018	receptor ligand activity	3/5	482/17697	0.000192754	0.001734785	0.000355073	IL6/VEGFA/TNF	3
MF	GO:0002020	protease binding	2/5	128/17697	0.000511732	0.003363885	0.000688514	TNF/CASP3	2
MF	GO:0070851	growth factor receptor binding	2/5	134/17697	0.000560647	0.003363885	0.000688514	IL6/VEGFA	2
MF	GO:0008083	growth factor activity	2/5	163/17697	0.000827955	0.004258053	0.000871531	IL6/VEGFA	2
MF	GO:0004861	cyclin-dependent protein serine/threonine kinase inhibitor activity	1/5	12/17697	0.003386193	0.0108805	0.002227003	CASP3	1
MF	GO:0016004	phospholipase activator activity	1/5	12/17697	0.003386193	0.0108805	0.002227003	CASP3	1
MF	GO:0005172	vascular endothelial growth factor receptor binding	1/5	13/17697	0.003667961	0.0108805	0.002227003	VEGFA	1
MF	GO:0004707	MAP kinase activity	1/5	14/17697	0.003949665	0.0108805	0.002227003	MAPK8	1
MF	GO:0060229	lipase activator activity	1/5	14/17697	0.003949665	0.0108805	0.002227003	CASP3	1
MF	GO:0005161	platelet-derived growth factor receptor binding	1/5	15/17697	0.004231306	0.0108805	0.002227003	VEGFA	1
MF	GO:0097153	cysteine-type endopeptidase activity involved in apoptotic process	1/5	15/17697	0.004231306	0.0108805	0.002227003	CASP3	1
MF	GO:0005123	death receptor binding	1/5	17/17697	0.004794396	0.01150655	0.002355142	CASP3	1
MF	GO:0004190	aspartic-type endopeptidase activity	1/5	25/17697	0.00704421	0.015212054	0.003113578	CASP3	1
MF	GO:0070001	aspartic-type peptidase activity	1/5	26/17697	0.00732515	0.015212054	0.003113578	CASP3	1
MF	GO:0001968	fibronectin binding	1/5	27/17697	0.007606027	0.015212054	0.003113578	VEGFA	1
MF	GO:0005164	tumor necrosis factor receptor binding	1/5	31/17697	0.008728899	0.016217024	0.003319274	TNF	1
MF	GO:0030291	protein serine/threonine kinase inhibitor activity	1/5	32/17697	0.009009458	0.016217024	0.003319274	CASP3	1
MF	GO:0042056	chemoattractant activity	1/5	38/17697	0.010691478	0.018328248	0.003751396	VEGFA	1
MF	GO:0016538	cyclin-dependent protein serine/threonine kinase regulator activity	1/5	49/17697	0.01376925	0.022531499	0.00461171	CASP3	1
MF	GO:0050840	extracellular matrix binding	1/5	57/17697	0.016002814	0.025047883	0.00512676	VEGFA	1
MF	GO:0004860	protein kinase inhibitor activity	1/5	63/17697	0.01767533	0.026512995	0.005426636	CASP3	1
MF	GO:0019210	kinase inhibitor activity	1/5	67/17697	0.018789077	0.027056271	0.005537833	CASP3	1
MF	GO:0042826	histone deacetylase binding	1/5	111/17697	0.030973753	0.042886735	0.008777987	MAPK8	1
MF	GO:0004197	cysteine-type endopeptidase activity	1/5	116/17697	0.03235068	0.04313424	0.008828646	CASP3	1
