# Supplementary material for: [Retracted] Investigating Celastrol’s Anti‐DCM Targets and Mechanisms via Network Pharmacology and Experimental Validation
Source: Hindawi journal article supplement (doi:10.1155/2022/7382130), 2022-01-01
Supplement: f7 [file 7382130.f7.txt]

Disease targets---C0853897_disease_gda_summary																		Disease targets---GeneCards							Disease targets---OMIM-Gene-Map-Retrieval														Total disease targets
Disease	Disease_id	Gene	Gene_id	UniProt	Gene_Full_Name	Protein_Class	N_diseases_g	DSI_g	DPI_g	pLI	Score_gda	EL_gda	EI_gda	N_PMIDs	N_SNPs_gda	First_Ref	Last_Ref	Gene Symbol	Description	Category	Gifts	GC Id	Relevance score	GeneCards Link	Gene Map Search - 'Diabetic cardiomyopathy '														Target
Diabetic Cardiomyopathies	C0853897	ATP2A2	488	P16615	ATPase sarcoplasmic/endoplasmic reticulum Ca2+ transporting 2	Transporter	159	0.529	0.808	0.99945	0.52		0.75	4	0	2002	2014	TTN	Titin	Protein Coding	47	GC02M178525	139.07	https://www.genecards.org/cgi-bin/carddisp.pl?gene=TTN	Downloaded:	Dec 05, 2020													A2M
Diabetic Cardiomyopathies	C0853897	AGT	183	P01019	angiotensinogen	Enzyme modulator	765	0.367	0.923	4.9706E-08	0.33		1	3	0	2013	2018	LMNA	Lamin A/C	Protein Coding	47	GC01P156082	127.6	https://www.genecards.org/cgi-bin/carddisp.pl?gene=LMNA	Copyright (c) 1966-2020 Johns Hopkins University OMIM, data are provided for research purposes only.														ABCA1
Diabetic Cardiomyopathies	C0853897	APOA1	335	P02647	apolipoprotein A1		416	0.429	0.885	0.00054909	0.31		1	1	0	2008	2008	INS	Insulin	Protein Coding	48	GC11M002159	110.03	https://www.genecards.org/cgi-bin/carddisp.pl?gene=INS															ABCA4
Diabetic Cardiomyopathies	C0853897	KLK1	3816	P06870	kallikrein 1	Enzyme	132	0.533	0.769	0.00015311	0.31		1	2	0	2004	2005	MYH7	Myosin Heavy Chain 7	Protein Coding	47	GC14M023412	90.25	https://www.genecards.org/cgi-bin/carddisp.pl?gene=MYH7	Cytogenetic location	Genomic coordinates (From NCBI/GRCh38)	Gene/Locus	Gene/Locus name	Gene/Locus MIM number	Approved Symbol	Entrez Gene ID	Ensembl Gene ID	Comments	Phenotype	Phenotype MIM number	Inheritance	Pheno map key	Mouse Gene (from MGI)	ABCB1
Diabetic Cardiomyopathies	C0853897	SPP1	6696	P10451	secreted phosphoprotein 1		824	0.353	0.885	0.000002146	0.31		1	2	0	2007	2015	KCNJ11	Potassium Inwardly Rectifying Channel Subfamily J Member 11	Protein Coding	47	GC11M017364	89.92	https://www.genecards.org/cgi-bin/carddisp.pl?gene=KCNJ11	1p36.32	1:3069202-3438620	PRDM16, MEL1, LVNC8, CMD1LL	PR domain-containing protein 16	605557	PRDM16	63976	ENSG00000142611,ENST00000270722.10		Cardiomyopathy, dilated, 1LL	615373	Autosomal dominant	3	Prdm16	ABCB11
Diabetic Cardiomyopathies	C0853897	AGTR2	186	P50052	angiotensin II receptor type 2	G-protein coupled receptor	229	0.496	0.808	0.0082345	0.3		1	2	0	2004	2005	GCK	Glucokinase	Protein Coding	50	GC07M044145	80.81	https://www.genecards.org/cgi-bin/carddisp.pl?gene=GCK	1p36.32	1:3069202-3438620	PRDM16, MEL1, LVNC8, CMD1LL	PR domain-containing protein 16	605557	PRDM16	63976	ENSG00000142611,ENST00000270722.10		Left ventricular noncompaction 8	615373	Autosomal dominant	3	Prdm16	ABCB7
Diabetic Cardiomyopathies	C0853897	RYR2	6262	Q92736	ryanodine receptor 2	Ion channel	160	0.539	0.615	0.99999	0.3		1	1	0	2006	2006	DSP	Desmoplakin	Protein Coding	49	GC06P007541	79.07	https://www.genecards.org/cgi-bin/carddisp.pl?gene=DSP	1p34.2	1:42456340-42473416	PPCS, CMD2C	Phosphopantothenoylcysteine synthetase	609853	PPCS	79717	ENSG00000127125,ENST00000372562.1		Cardiomyopathy, dilated, 2C	618189	Autosomal recessive	3	Ppcs	ABCC6
Diabetic Cardiomyopathies	C0853897	INS	3630	P01308	insulin		405	0.445	0.923	0.30091	0.3		1	1	0	2010	2010	PPARG	Peroxisome Proliferator Activated Receptor Gamma	Protein Coding	52	GC03P012287	76.09	https://www.genecards.org/cgi-bin/carddisp.pl?gene=PPARG	1p31.1	1:74235386-74544427	TNNI3K, CCDD	TNNI3-interacting kinase	613932	TNNI3K	51086	ENSG00000116783,ENST00000326637.8		Cardiac conduction disease with or without dilated cardiomyopathy	616117	Autosomal dominant	3	Tnni3k	ABCC8
Diabetic Cardiomyopathies	C0853897	SLC25A4	291	P12235	solute carrier family 25 member 4	Transporter	160	0.568	0.692	0.45334	0.3		1	1	0	2009	2009	ABCC8	ATP Binding Cassette Subfamily C Member 8	Protein Coding	45	GC11M017392	75.99	https://www.genecards.org/cgi-bin/carddisp.pl?gene=ABCC8	1p31.1	1:77888527-77948642	NEXN, NELIN, CMD1CC, CMH20	Nexilin F-actin binding protein	613121	NEXN	91624	ENSG00000162614,ENST00000330010.12		Cardiomyopathy, dilated, 1CC	613122	Autosomal dominant	3	Nexn	ABCC9
Diabetic Cardiomyopathies	C0853897	IGF1	3479	P05019	insulin like growth factor 1		1206	0.318	0.885	0.2716	0.3		1	1	0	2001	2001	ACE	Angiotensin I Converting Enzyme	Protein Coding	49	GC17P063477	75.36	https://www.genecards.org/cgi-bin/carddisp.pl?gene=ACE	1p31.1	1:77888527-77948642	NEXN, NELIN, CMD1CC, CMH20	Nexilin F-actin binding protein	613121	NEXN	91624	ENSG00000162614,ENST00000330010.12		Cardiomyopathy, hypertrophic, 20	613876	Autosomal dominant	3	Nexn	ABHD5
Diabetic Cardiomyopathies	C0853897	TNF	7124	P01375	tumor necrosis factor	Signaling	2724	0.231	0.962	0.8033	0.3		1	1	0	2007	2007	INSR	Insulin Receptor	Protein Coding	54	GC19M007112	72.66	https://www.genecards.org/cgi-bin/carddisp.pl?gene=INSR	1p13.2	1:113813810-113871760	PTPN22, PEP, PTPN8, LYP	Protein tyrosine phosphatase, nonreceptor-type 22	600716	PTPN22	26191	ENSG00000134242,ENST00000538253.5		{Diabetes, type 1, susceptibility to}	222100	Autosomal recessive	3	Ptpn22	ABPA
Diabetic Cardiomyopathies	C0853897	NFE2L2	4780	Q16236	nuclear factor, erythroid 2 like 2	Enzyme	823	0.357	0.885	0.0035719	0.3		1	11	0	2013	2019	FLNC	Filamin C	Protein Coding	44	GC07P128830	68.33	https://www.genecards.org/cgi-bin/carddisp.pl?gene=FLNC	1p13.2	1:113813810-113871760	PTPN22, PEP, PTPN8, LYP	Protein tyrosine phosphatase, nonreceptor-type 22	600716	PTPN22	26191	ENSG00000134242,ENST00000538253.5		{Rheumatoid arthritis, susceptibility to}	180300		3	Ptpn22	ABPL
Diabetic Cardiomyopathies	C0853897	ACE2	59272	Q9BYF1	angiotensin I converting enzyme 2	Enzyme	253	0.477	0.769	0.99769	0.23		1	4	0	2012	2019	TTN-AS1	TTN Antisense RNA 1	RNA Gene	15	GC02P178521	68.11	https://www.genecards.org/cgi-bin/carddisp.pl?gene=TTN-AS1	1p13.2	1:113813810-113871760	PTPN22, PEP, PTPN8, LYP	Protein tyrosine phosphatase, nonreceptor-type 22	600716	PTPN22	26191	ENSG00000134242,ENST00000538253.5		{Systemic lupus erythematosus susceptibility to}	152700	Autosomal dominant	3	Ptpn22	ACAD9
Diabetic Cardiomyopathies	C0853897	MAPK3	5595	P27361	mitogen-activated protein kinase 3	Kinase	647	0.379	0.885	0.036884	0.23		1	4	0	2015	2017	TNNT2	Troponin T2, Cardiac Type	Protein Coding	48	GC01M201359	68.1	https://www.genecards.org/cgi-bin/carddisp.pl?gene=TNNT2	1q22	1:156082572-156140080	LMNA, LMN1, EMD2, FPLD2, CMD1A, HGPS	Lamin A/C	150330	LMNA	4000	ENSG00000160789,ENST00000448611.6		Cardiomyopathy, dilated, 1A	115200	Autosomal dominant	3	Lmna	ACADL
Diabetic Cardiomyopathies	C0853897	PPARA	5465	Q07869	peroxisome proliferator activated receptor alpha	Nuclear receptor	408	0.432	0.885	0.030182	0.23		1	4	0	2009	2018	MYH6	Myosin Heavy Chain 6	Protein Coding	45	GC14M023380	64.31	https://www.genecards.org/cgi-bin/carddisp.pl?gene=MYH6	1q22	1:156082572-156140080	LMNA, LMN1, EMD2, FPLD2, CMD1A, HGPS	Lamin A/C	150330	LMNA	4000	ENSG00000160789,ENST00000448611.6		Charcot-Marie-Tooth disease, type 2B1	605588	Autosomal recessive	3	Lmna	ACADM
Diabetic Cardiomyopathies	C0853897	MAPK1	5594	P28482	mitogen-activated protein kinase 1	Kinase	1059	0.33	0.923	0.99698	0.22		1	3	0	2015	2019	MYBPC3	Myosin Binding Protein C3	Protein Coding	46	GC11M061124	63.91	https://www.genecards.org/cgi-bin/carddisp.pl?gene=MYBPC3	1q22	1:156082572-156140080	LMNA, LMN1, EMD2, FPLD2, CMD1A, HGPS	Lamin A/C	150330	LMNA	4000	ENSG00000160789,ENST00000448611.6		Emery-Dreifuss muscular dystrophy 2, autosomal dominant	181350	Autosomal dominant	3	Lmna	ACADS
Diabetic Cardiomyopathies	C0853897	PLN	5350	P26678	phospholamban		90	0.595	0.577	0.44947	0.22		1	3	0	2010	2012	IL6	Interleukin 6	Protein Coding	50	GC07P022765	63.32	https://www.genecards.org/cgi-bin/carddisp.pl?gene=IL6	1q22	1:156082572-156140080	LMNA, LMN1, EMD2, FPLD2, CMD1A, HGPS	Lamin A/C	150330	LMNA	4000	ENSG00000160789,ENST00000448611.6		Emery-Dreifuss muscular dystrophy 3, autosomal recessive	616516	Autosomal recessive	3	Lmna	ACADVL
Diabetic Cardiomyopathies	C0853897	BCL2	596	P10415	BCL2 apoptosis regulator	Signaling	1456	0.291	0.885	0.55903	0.21		1	2	0	2011	2018	HNF1A	HNF1 Homeobox A	Protein Coding	45	GC12P120978	62.75	https://www.genecards.org/cgi-bin/carddisp.pl?gene=HNF1A	1q22	1:156082572-156140080	LMNA, LMN1, EMD2, FPLD2, CMD1A, HGPS	Lamin A/C	150330	LMNA	4000	ENSG00000160789,ENST00000448611.6		Heart-hand syndrome, Slovenian type	610140	Autosomal dominant	3	Lmna	ACE
Diabetic Cardiomyopathies	C0853897	ACE	1636	P12821	angiotensin I converting enzyme	Enzyme	1082	0.328	0.923	1.0344E-37	0.21		1	2	0	2012	2017	TNNI3	Troponin I3, Cardiac Type	Protein Coding	48	GC19M055151	60.18	https://www.genecards.org/cgi-bin/carddisp.pl?gene=TNNI3	1q22	1:156082572-156140080	LMNA, LMN1, EMD2, FPLD2, CMD1A, HGPS	Lamin A/C	150330	LMNA	4000	ENSG00000160789,ENST00000448611.6		Hutchinson-Gilford progeria	176670	Autosomal dominant; Autosomal recessive	3	Lmna	ACE1
Diabetic Cardiomyopathies	C0853897	NPPA	4878	P01160	natriuretic peptide A		217	0.505	0.769	0.00054522	0.21		1	2	0	2013	2015	WFS1	Wolframin ER Transmembrane Glycoprotein	Protein Coding	45	GC04P006271	59.97	https://www.genecards.org/cgi-bin/carddisp.pl?gene=WFS1	1q22	1:156082572-156140080	LMNA, LMN1, EMD2, FPLD2, CMD1A, HGPS	Lamin A/C	150330	LMNA	4000	ENSG00000160789,ENST00000448611.6		Lipodystrophy, familial partial, type 2	151660	Autosomal dominant	3	Lmna	ACE2
Diabetic Cardiomyopathies	C0853897	HMOX1	3162	P09601	heme oxygenase 1		666	0.381	0.923	0.0096817	0.21		1	3	0	2013	2019	VEGFA	Vascular Endothelial Growth Factor A	Protein Coding	48	GC06P043770	59.53	https://www.genecards.org/cgi-bin/carddisp.pl?gene=VEGFA	1q22	1:156082572-156140080	LMNA, LMN1, EMD2, FPLD2, CMD1A, HGPS	Lamin A/C	150330	LMNA	4000	ENSG00000160789,ENST00000448611.6		Malouf syndrome	212112	Autosomal dominant	3	Lmna	ACHE
Diabetic Cardiomyopathies	C0853897	CASR	846	P41180	calcium sensing receptor	G-protein coupled receptor	517	0.41	0.846	0.046698	0.21		1	2	0	2012	2018	IGF1	Insulin Like Growth Factor 1	Protein Coding	50	GC12M102395	59.38	https://www.genecards.org/cgi-bin/carddisp.pl?gene=IGF1	1q22	1:156082572-156140080	LMNA, LMN1, EMD2, FPLD2, CMD1A, HGPS	Lamin A/C	150330	LMNA	4000	ENSG00000160789,ENST00000448611.6		Mandibuloacral dysplasia	248370	Autosomal recessive	3	Lmna	ACNINV3
Diabetic Cardiomyopathies	C0853897	CTNNB1	1499	P35222	catenin beta 1		1368	0.303	0.885	0.99999	0.21		1	2	0	2016	2017	DMD	Dystrophin	Protein Coding	46	GC0XM031047	57.2	https://www.genecards.org/cgi-bin/carddisp.pl?gene=DMD	1q22	1:156082572-156140080	LMNA, LMN1, EMD2, FPLD2, CMD1A, HGPS	Lamin A/C	150330	LMNA	4000	ENSG00000160789,ENST00000448611.6		Muscular dystrophy, congenital	613205	Autosomal dominant	3	Lmna	ACO1
Diabetic Cardiomyopathies	C0853897	ATP7A	538	Q04656	ATPase copper transporting alpha	Transporter	348	0.494	0.769	0.99983	0.2		1	1	0	2014	2014	LEP	Leptin	Protein Coding	47	GC07P128241	55.38	https://www.genecards.org/cgi-bin/carddisp.pl?gene=LEP	1q22	1:156082572-156140080	LMNA, LMN1, EMD2, FPLD2, CMD1A, HGPS	Lamin A/C	150330	LMNA	4000	ENSG00000160789,ENST00000448611.6		Restrictive dermopathy, lethal	275210	Autosomal recessive	3	Lmna	Acot1
Diabetic Cardiomyopathies	C0853897	A2M	2	P01023	alpha-2-macroglobulin	Enzyme modulator	147	0.529	0.769	4.5229E-11	0.2		1	1	0	2013	2013	RYR2	Ryanodine Receptor 2	Protein Coding	47	GC01P237042	55.22	https://www.genecards.org/cgi-bin/carddisp.pl?gene=RYR2	1q32.1	1:201359013-201377827	TNNT2, CMH2, CMD1D, RCM3, LVNC6	Troponin-T2, cardiac	191045	TNNT2	7139	ENSG00000118194,ENST00000422165.6		Cardiomyopathy, dilated, 1D	601494	Autosomal dominant	3	Tnnt2	Acot2
Diabetic Cardiomyopathies	C0853897	CASQ2	845	O14958	calsequestrin 2		41	0.691	0.385	1.3885E-12	0.2		1	1	0	2011	2011	HFE	Homeostatic Iron Regulator	Protein Coding	43	GC06P026087	54.73	https://www.genecards.org/cgi-bin/carddisp.pl?gene=HFE	1q32.1	1:201359013-201377827	TNNT2, CMH2, CMD1D, RCM3, LVNC6	Troponin-T2, cardiac	191045	TNNT2	7139	ENSG00000118194,ENST00000422165.6		Cardiomyopathy, familial restrictive, 3	612422	Autosomal dominant	3	Tnnt2	ACP1
Diabetic Cardiomyopathies	C0853897	CASP9	842	P55211	caspase 9	Enzyme	293	0.458	0.808	7.3826E-06	0.2		1	1	0	2017	2017	TPM1	Tropomyosin 1	Protein Coding	48	GC15P073930	54.66	https://www.genecards.org/cgi-bin/carddisp.pl?gene=TPM1	1q32.1	1:201359013-201377827	TNNT2, CMH2, CMD1D, RCM3, LVNC6	Troponin-T2, cardiac	191045	TNNT2	7139	ENSG00000118194,ENST00000422165.6		Cardiomyopathy, hypertrophic, 2	115195	Autosomal dominant	3	Tnnt2	ACPHD
Diabetic Cardiomyopathies	C0853897	ERBB2	2064	P04626	erb-b2 receptor tyrosine kinase 2	Kinase	995	0.328	0.923	0.0059892	0.2		1	1	0	2013	2013	TCF7L2	Transcription Factor 7 Like 2	Protein Coding	45	GC10P112950	53.26	https://www.genecards.org/cgi-bin/carddisp.pl?gene=TCF7L2	1q32.1	1:201359013-201377827	TNNT2, CMH2, CMD1D, RCM3, LVNC6	Troponin-T2, cardiac	191045	TNNT2	7139	ENSG00000118194,ENST00000422165.6		Left ventricular noncompaction 6	601494	Autosomal dominant	3	Tnnt2	Acsl6
Diabetic Cardiomyopathies	C0853897	ERBB4	2066	Q15303	erb-b2 receptor tyrosine kinase 4	Kinase	317	0.455	0.846	0.99912	0.2		1	1	0	2013	2013	MT-TL1	Mitochondrially Encoded TRNA-Leu (UUA/G) 1	RNA Gene	15	GCMTP003232	52.19	https://www.genecards.org/cgi-bin/carddisp.pl?gene=MT-TL1	1q42.13	1:226870593-226903828	PSEN2, AD4, STM2, CMD1V	Presenilin 2	600759	PSEN2	5664	ENSG00000143801,ENST00000366783.8		Alzheimer disease-4	606889	Autosomal dominant	3	Psen2	ACTA1
Diabetic Cardiomyopathies	C0853897	SLC8A1	6546	P32418	solute carrier family 8 member A1	Transporter	146	0.544	0.769	0.9957	0.2		1	1	0	2016	2016	DSC2	Desmocollin 2	Protein Coding	45	GC18M031058	51	https://www.genecards.org/cgi-bin/carddisp.pl?gene=DSC2	1q42.13	1:226870593-226903828	PSEN2, AD4, STM2, CMD1V	Presenilin 2	600759	PSEN2	5664	ENSG00000143801,ENST00000366783.8		Cardiomyopathy, dilated, 1V	613697	Autosomal dominant	3	Psen2	ACTB
Diabetic Cardiomyopathies	C0853897	CASP3	836	P42574	caspase 3	Enzyme	819	0.351	0.923	0.10017	0.2		1	1	0	2017	2017	KCNQ1	Potassium Voltage-Gated Channel Subfamily Q Member 1	Protein Coding	49	GC11P002444	50.88	https://www.genecards.org/cgi-bin/carddisp.pl?gene=KCNQ1	1q43	1:236686498-236764630	ACTN2, CMD1AA, CMH23, MYOCOZ, MPD6	Actinin, alpha-2	102573	ACTN2	88	ENSG00000077522,ENST00000366578.6		Cardiomyopathy, dilated, 1AA, with or without LVNC	612158	Autosomal dominant	3	Actn2	ACTC1
Diabetic Cardiomyopathies	C0853897	IL10	3586	P22301	interleukin 10		1679	0.281	0.923	0.0058874	0.2		1	1	0	2013	2013	ACTN2	Actinin Alpha 2	Protein Coding	47	GC01P236686	50.06	https://www.genecards.org/cgi-bin/carddisp.pl?gene=ACTN2	1q43	1:236686498-236764630	ACTN2, CMD1AA, CMH23, MYOCOZ, MPD6	Actinin, alpha-2	102573	ACTN2	88	ENSG00000077522,ENST00000366578.6		Cardiomyopathy, hypertrophic, 23, with or without LVNC	612158	Autosomal dominant	3	Actn2	ACTG1
Diabetic Cardiomyopathies	C0853897	ADIPOR1	51094	Q96A54	adiponectin receptor 1	Receptor	148	0.529	0.808	0.6584	0.2		1	1	0	2014	2014	SOD2	Superoxide Dismutase 2	Protein Coding	51	GC06M159669	49.9	https://www.genecards.org/cgi-bin/carddisp.pl?gene=SOD2	1q43	1:236686498-236764630	ACTN2, CMD1AA, CMH23, MYOCOZ, MPD6	Actinin, alpha-2	102573	ACTN2	88	ENSG00000077522,ENST00000366578.6		Myopathy, congenital with structured cores and Z-line abnormalities	618654	Autosomal dominant	3	Actn2	ACTN1
Diabetic Cardiomyopathies	C0853897	CFL1	1072	P23528	cofilin 1		153	0.529	0.769	0.55563	0.2		1	1	0	2017	2017	NOS3	Nitric Oxide Synthase 3	Protein Coding	51	GC07P150990	48.78	https://www.genecards.org/cgi-bin/carddisp.pl?gene=NOS3	1q43	1:236686498-236764630	ACTN2, CMD1AA, CMH23, MYOCOZ, MPD6	Actinin, alpha-2	102573	ACTN2	88	ENSG00000077522,ENST00000366578.6		Myopathy, distal, 6, adult onset	618655	Autosomal dominant	3	Actn2	ACTN2
Diabetic Cardiomyopathies	C0853897	CASP8	841	Q14790	caspase 8	Enzyme	480	0.404	0.923	3.7236E-06	0.2		1	1	0	2017	2017	ALMS1	ALMS1 Centrosome And Basal Body Associated Protein	Protein Coding	41	GC02P073385	48.7	https://www.genecards.org/cgi-bin/carddisp.pl?gene=ALMS1	2p25.1	2:10043549-10054835	KLF11, TIEG2, FKLF1, FKLF, MODY7	Kruppel-like factor 11	603301	KLF11	8462	ENSG00000172059,ENST00000540845.5		Maturity-onset diabetes of the young, type VII	610508		3	Klf11	ACTN4
Diabetic Cardiomyopathies	C0853897	MYLK2	85366	Q9H1R3	myosin light chain kinase 2	Kinase	35	0.705	0.269	0.23336	0.2		1	1	0	1997	1997	TTR	Transthyretin	Protein Coding	49	GC18P031557	48.25	https://www.genecards.org/cgi-bin/carddisp.pl?gene=TTR	2q14-q22	2:112200000-147900000	CMD1H	Cardiomyopathy, dilated, 1H	604288		23459			Cardiomyopathy, dilated, 1H	604288		2		ACVR1C
Diabetic Cardiomyopathies	C0853897	XDH	7498	P47989	xanthine dehydrogenase	Enzyme	165	0.529	0.846	2.589E-22	0.2		1	1	0	2013	2013	SCN5A	Sodium Voltage-Gated Channel Alpha Subunit 5	Protein Coding	50	GC03M038549	48.04	https://www.genecards.org/cgi-bin/carddisp.pl?gene=SCN5A	2q14.1	2:113099364-113134015	IL1RN, MVCD4, DIRA	Interleukin-1 receptor antagonist	147679	IL1RN	3557	ENSG00000136689,ENST00000354115.6		{Gastric cancer risk after H. pylori infection}	137215	Autosomal dominant	3	Il1rn	AD3
Diabetic Cardiomyopathies	C0853897	NOS3	4846	P29474	nitric oxide synthase 3		706	0.378	0.885	6.7246E-07	0.2		1	1	0	2018	2018	PRKAG2	Protein Kinase AMP-Activated Non-Catalytic Subunit Gamma 2	Protein Coding	50	GC07M151556	47.43	https://www.genecards.org/cgi-bin/carddisp.pl?gene=PRKAG2	2q14.1	2:113099364-113134015	IL1RN, MVCD4, DIRA	Interleukin-1 receptor antagonist	147679	IL1RN	3557	ENSG00000136689,ENST00000354115.6		{Microvascular complications of diabetes 4}	612628		3	Il1rn	AD4
Diabetic Cardiomyopathies	C0853897	TERT	7015	O14746	telomerase reverse transcriptase	Enzyme	703	0.374	0.846	0.99046	0.2		1	1	0	2010	2010	BSCL2	BSCL2 Lipid Droplet Biogenesis Associated, Seipin	Protein Coding	42	GC11M063438	47.22	https://www.genecards.org/cgi-bin/carddisp.pl?gene=BSCL2	2q14.1	2:113099364-113134015	IL1RN, MVCD4, DIRA	Interleukin-1 receptor antagonist	147679	IL1RN	3557	ENSG00000136689,ENST00000354115.6		Interleukin 1 receptor antagonist deficiency	612852	Autosomal recessive	3	Il1rn	ADA
Diabetic Cardiomyopathies	C0853897	BAD	572	Q92934	BCL2 associated agonist of cell death		125	0.553	0.769	0.0046237	0.2		1	1	0	2011	2011	CCL2	C-C Motif Chemokine Ligand 2	Protein Coding	48	GC17P034255	47.19	https://www.genecards.org/cgi-bin/carddisp.pl?gene=CCL2	2q14.3	2:127638420-127681785	LIMS2, PINCH2, MDRCMTT	LIM and senescent cell antigen-like domains 2	607908	LIMS2	55679	ENSG00000072163,ENST00000545738.6	mutation identified in 1 LGMD2W family	?Muscular dystrophy, autosomal recessive, with cardiomyopathy and triangular tongue	616827	Autosomal recessive	3	Lims2	ADAM17
Diabetic Cardiomyopathies	C0853897	ADIPOQ	9370	Q15848	adiponectin, C1Q and collagen domain containing		679	0.376	0.885	4.6434E-09	0.2		1	1	0	2014	2014	MT-ND1	Mitochondrially Encoded NADH:Ubiquinone Oxidoreductase Core Subunit 1	Protein Coding	32	GCMTP003309	46.76	https://www.genecards.org/cgi-bin/carddisp.pl?gene=MT-ND1	2q24.1	2:156435289-156586402	GPD2	Glycerol-3-phosphate dehydrogenase 2 (mitochondrial)	138430	GPD2	2820	ENSG00000115159,ENST00000438166.7	pseudogene on 19	{Type 2 diabetes mellitus, susceptibility to}	125853	Autosomal dominant	3	Gpd2	Adam4
Diabetic Cardiomyopathies	C0853897	AGER	177	Q15109	advanced glycosylation end-product specific receptor	Receptor	450	0.42	0.885	6.3528E-16	0.2		1	1	0	2012	2012	CAT	Catalase	Protein Coding	50	GC11P034460	46.31	https://www.genecards.org/cgi-bin/carddisp.pl?gene=CAT	2q24.3	2:162900000-168900000	IDDM19	Diabetes mellitus, insulin-dependent, 19	610155				associated with rs1990760	{Diabetes mellitus, insulin-dependent, 19}	610155		2		ADAR
Diabetic Cardiomyopathies	C0853897	NRG1	3084	Q02297	neuregulin 1	Signaling	304	0.464	0.885	0.99665	0.2		1	1	0	2013	2013	SLC2A2	Solute Carrier Family 2 Member 2	Protein Coding	48	GC03M170996	45.53	https://www.genecards.org/cgi-bin/carddisp.pl?gene=SLC2A2	2q24.3	2:166888479-167259752	CMYA3, XIRP2	Cardiomyopathy-associated protein 3	609778	XIRP2	129446	ENSG00000163092,ENST00000409043.5					Xirp2		ADAT3
Diabetic Cardiomyopathies	C0853897	CASP12	100506742	Q6UXS9	caspase 12 (gene/pseudogene)		44	0.638	0.808	0.00012749	0.2		1	1	0	2016	2016	CTLA4	Cytotoxic T-Lymphocyte Associated Protein 4	Protein Coding	45	GC02P203867	45.3	https://www.genecards.org/cgi-bin/carddisp.pl?gene=CTLA4	2q31	2:168900000-182100000	IDDM7	Insulin-dependent diabetes mellitus-7	600321		3406			{Diabetes mellitus, insulin-dependent, 7}	600321		2		ADCY10
Diabetic Cardiomyopathies	C0853897	SIRT1	23411	Q96EB6	sirtuin 1	Epigenetic regulator	675	0.378	0.885	0.087326	0.1		1	10	0	2017	2019	NEXN	Nexilin F-Actin Binding Protein	Protein Coding	39	GC01P077898	44.7	https://www.genecards.org/cgi-bin/carddisp.pl?gene=NEXN	2q31.2	2:178525988-178807422	TTN, CMD1G, TMD, LGMDR10, MPRM, HMERF, SALMY	Titin	188840	TTN	7273	ENSG00000155657,ENST00000591111.5		Cardiomyopathy, dilated, 1G	604145		3	Ttn	ADCY3
Diabetic Cardiomyopathies	C0853897	NLRP3	114548	Q96P20	NLR family pyrin domain containing 3		805	0.361	0.962	0.00081103	0.09		1	9	0	2017	2019	TGFB1	Transforming Growth Factor Beta 1	Protein Coding	52	GC19M041301	43.86	https://www.genecards.org/cgi-bin/carddisp.pl?gene=TGFB1	2q31.2	2:178525988-178807422	TTN, CMD1G, TMD, LGMDR10, MPRM, HMERF, SALMY	Titin	188840	TTN	7273	ENSG00000155657,ENST00000591111.5		Cardiomyopathy, familial hypertrophic, 9	613765	Autosomal dominant	3	Ttn	ADCY5
Diabetic Cardiomyopathies	C0853897	GABPA	2551	Q06546	GA binding protein transcription factor subunit alpha	Transcription factor	632	0.379	0.885	0.99812	0.08		1	8	0	2016	2019	PON1	Paraoxonase 1	Protein Coding	45	GC07M095297	43.53	https://www.genecards.org/cgi-bin/carddisp.pl?gene=PON1	2q31.2	2:178525988-178807422	TTN, CMD1G, TMD, LGMDR10, MPRM, HMERF, SALMY	Titin	188840	TTN	7273	ENSG00000155657,ENST00000591111.5		Muscular dystrophy, limb-girdle, autosomal recessive 10	608807	Autosomal recessive	3	Ttn	ADCY6
Diabetic Cardiomyopathies	C0853897	MST1	4485	P26927	macrophage stimulating 1	Enzyme	281	0.465	0.885	4.7831E-19	0.05		1	5	0	2017	2020	TNF	Tumor Necrosis Factor	Protein Coding	51	GC06P047305	43.34	https://www.genecards.org/cgi-bin/carddisp.pl?gene=TNF	2q31.2	2:178525988-178807422	TTN, CMD1G, TMD, LGMDR10, MPRM, HMERF, SALMY	Titin	188840	TTN	7273	ENSG00000155657,ENST00000591111.5		Myopathy, myofibrillar, 9, with early respiratory failure	603689	Autosomal dominant	3	Ttn	ADCY8
Diabetic Cardiomyopathies	C0853897	FGF21	26291	Q9NSA1	fibroblast growth factor 21	Signaling	236	0.485	0.769	0.029439	0.04		1	4	0	2017	2019	LDB3	LIM Domain Binding 3	Protein Coding	41	GC10P086666	43.31	https://www.genecards.org/cgi-bin/carddisp.pl?gene=LDB3	2q31.2	2:178525988-178807422	TTN, CMD1G, TMD, LGMDR10, MPRM, HMERF, SALMY	Titin	188840	TTN	7273	ENSG00000155657,ENST00000591111.5		Salih myopathy	611705	Autosomal recessive	3	Ttn	ADGRV1
Diabetic Cardiomyopathies	C0853897	PRKAA1	5562	Q13131	protein kinase AMP-activated catalytic subunit alpha 1	Kinase	325	0.453	0.846	0.13725	0.04		1	4	0	2017	2019	HLA-DRB1	Major Histocompatibility Complex, Class II, DR Beta 1	Protein Coding	46	GC06M032578	43.04	https://www.genecards.org/cgi-bin/carddisp.pl?gene=HLA-DRB1	2q31.2	2:178525988-178807422	TTN, CMD1G, TMD, LGMDR10, MPRM, HMERF, SALMY	Titin	188840	TTN	7273	ENSG00000155657,ENST00000591111.5		Tibial muscular dystrophy, tardive	600334	Autosomal dominant	3	Ttn	ADH1B
Diabetic Cardiomyopathies	C0853897	SLC5A2	6524	P31639	solute carrier family 5 member 2	Transporter	214	0.499	0.769	4.9184E-14	0.03		1	3	0	2017	2019	PRDM16	PR/SET Domain 16	Protein Coding	45	GC01P003068	43.03	https://www.genecards.org/cgi-bin/carddisp.pl?gene=PRDM16	2q31.3	2:181668294-181680516	NEUROD1, T2D	Neurogenic differentiation 1	601724	NEUROD1	4760	ENSG00000162992,ENST00000295108.3		{Type 2 diabetes mellitus, susceptibility to}	125853	Autosomal dominant	3	Neurod1	ADHR
Diabetic Cardiomyopathies	C0853897	GCG	2641	P01275	glucagon		441	0.431	0.885	0.034814	0.03		1	3	0	2016	2019	DSG2	Desmoglein 2	Protein Coding	45	GC18P031498	42.67	https://www.genecards.org/cgi-bin/carddisp.pl?gene=DSG2	2q31.3	2:181668294-181680516	NEUROD1, T2D	Neurogenic differentiation 1	601724	NEUROD1	4760	ENSG00000162992,ENST00000295108.3		Maturity-onset diabetes of the young 6	606394		3	Neurod1	ADIPOQ
Diabetic Cardiomyopathies	C0853897	SIRT3	23410	Q9NTG7	sirtuin 3	Epigenetic regulator	227	0.488	0.731	0.00016261	0.03		1	3	0	2017	2019	RETN	Resistin	Protein Coding	43	GC19P007669	42.55	https://www.genecards.org/cgi-bin/carddisp.pl?gene=RETN	2q33.2	2:203867770-203873964	CTLA4, IDDM12, CELIAC3, ALPS5	Cytotoxic T-lymphocyte-associated serine esterase-4	123890	CTLA4	1493	ENSG00000163599,ENST00000295854.10		{Celiac disease, susceptibility to, 3}	609755		3	Ctla4	ADIPOR1
Diabetic Cardiomyopathies	C0853897	PRKAA2	5563	P54646	protein kinase AMP-activated catalytic subunit alpha 2	Kinase	317	0.456	0.846	3.5282E-08	0.03		1	3	0	2017	2018	TGFB3	Transforming Growth Factor Beta 3	Protein Coding	47	GC14M075958	42.12	https://www.genecards.org/cgi-bin/carddisp.pl?gene=TGFB3	2q33.2	2:203867770-203873964	CTLA4, IDDM12, CELIAC3, ALPS5	Cytotoxic T-lymphocyte-associated serine esterase-4	123890	CTLA4	1493	ENSG00000163599,ENST00000295854.10		{Diabetes mellitus, insulin-dependent, 12}	601388		3	Ctla4	ADM
Diabetic Cardiomyopathies	C0853897	PIK3CG	5294	P48736	phosphatidylinositol-4,5-bisphosphate 3-kinase catalytic subunit gamma	Kinase	1101	0.32	0.885	1.4076E-06	0.03		1	3	0	2017	2019	TNNC1	Troponin C1, Slow Skeletal And Cardiac Type	Protein Coding	45	GC03M052452	41.85	https://www.genecards.org/cgi-bin/carddisp.pl?gene=TNNC1	2q33.2	2:203867770-203873964	CTLA4, IDDM12, CELIAC3, ALPS5	Cytotoxic T-lymphocyte-associated serine esterase-4	123890	CTLA4	1493	ENSG00000163599,ENST00000295854.10		{Hashimoto thyroiditis}	140300	Autosomal dominant	3	Ctla4	ADORA1
Diabetic Cardiomyopathies	C0853897	DECR1	1666	Q16698	2,4-dienoyl-CoA reductase 1	Enzyme	399	0.426	0.885	4.4689E-14	0.03		1	3	0	2015	2018	HLA-DQB1	Major Histocompatibility Complex, Class II, DQ Beta 1	Protein Coding	44	GC06M032804	41.83	https://www.genecards.org/cgi-bin/carddisp.pl?gene=HLA-DQB1	2q33.2	2:203867770-203873964	CTLA4, IDDM12, CELIAC3, ALPS5	Cytotoxic T-lymphocyte-associated serine esterase-4	123890	CTLA4	1493	ENSG00000163599,ENST00000295854.10		{Systemic lupus erythematosus, susceptibility to}	152700	Autosomal dominant	3	Ctla4	ADORA2A
Diabetic Cardiomyopathies	C0853897	EDN1	1906	P05305	endothelin 1	Signaling	679	0.38	0.846	0.45504	0.03		1	3	0	2009	2019	NPPA	Natriuretic Peptide A	Protein Coding	46	GC01M011846	41.45	https://www.genecards.org/cgi-bin/carddisp.pl?gene=NPPA	2q33.2	2:203867770-203873964	CTLA4, IDDM12, CELIAC3, ALPS5	Cytotoxic T-lymphocyte-associated serine esterase-4	123890	CTLA4	1493	ENSG00000163599,ENST00000295854.10		Autoimmune lymphoproliferative syndrome, type V	616100	Autosomal dominant	3	Ctla4	ADRA1D
Diabetic Cardiomyopathies	C0853897	REN	5972	P00797	renin	Enzyme	721	0.37	0.923	2.4297E-07	0.03		1	3	0	2013	2019	TP53	Tumor Protein P53	Protein Coding	54	GC17M007661	41.3	https://www.genecards.org/cgi-bin/carddisp.pl?gene=TP53	2q34	2:208200000-214500000	IDDM13	Insulin-dependent diabetes mellitus-13	601318		3412			{Diabetes mellitus, insulin-dependent, 13}	601318		2		ADRA2C
Diabetic Cardiomyopathies	C0853897	KCNQ1OT1	10984		KCNQ1 opposite strand/antisense transcript 1		159	0.534	0.731		0.03		1	3	0	2018	2020	ALB	Albumin	Protein Coding	50	GC04P073397	41.16	https://www.genecards.org/cgi-bin/carddisp.pl?gene=ALB	2q35	2:219418376-219426733	DES, CMD1I, MFM1, SCPNK	Desmin	125660	DES	1674	ENSG00000175084,ENST00000373960.4		Cardiomyopathy, dilated, 1I	604765	Autosomal dominant	3	Des	ADRB1
Diabetic Cardiomyopathies	C0853897	PRKAB1	5564	Q9Y478	protein kinase AMP-activated non-catalytic subunit beta 1	Kinase	296	0.46	0.846	0.0052573	0.03		1	3	0	2017	2018	APOE	Apolipoprotein E	Protein Coding	50	GC19P044906	41.02	https://www.genecards.org/cgi-bin/carddisp.pl?gene=APOE	2q35	2:219418376-219426733	DES, CMD1I, MFM1, SCPNK	Desmin	125660	DES	1674	ENSG00000175084,ENST00000373960.4		Myopathy, myofibrillar, 1	601419	Autosomal dominant; Autosomal recessive	3	Des	ADRB2
Diabetic Cardiomyopathies	C0853897	MIR34A	407040		microRNA 34a		428	0.421	0.846		0.02		1	2	0	2019	2020	STAT3	Signal Transducer And Activator Of Transcription 3	Protein Coding	52	GC17M042313	40.9	https://www.genecards.org/cgi-bin/carddisp.pl?gene=STAT3	2q35	2:219418376-219426733	DES, CMD1I, MFM1, SCPNK	Desmin	125660	DES	1674	ENSG00000175084,ENST00000373960.4		Scapuloperoneal syndrome, neurogenic, Kaeser type	181400	Autosomal dominant	3	Des	ADRB3
Diabetic Cardiomyopathies	C0853897	SYK	6850	P43405	spleen associated tyrosine kinase	Kinase	229	0.475	0.808	0.99986	0.02		1	2	0	2018	2019	APOA1	Apolipoprotein A1	Protein Coding	48	GC11M116835	40.88	https://www.genecards.org/cgi-bin/carddisp.pl?gene=APOA1	2q36.3	2:226731311-226799819	IRS1	Insulin receptor substrate-1	147545	IRS1	3667	ENSG00000169047,ENST00000305123.5		{Coronary artery disease, susceptibility to}			3	Irs1	AFP
Diabetic Cardiomyopathies	C0853897	MME	4311	P08473	membrane metalloendopeptidase	Enzyme	470	0.407	0.808	1.465E-18	0.02		1	2	0	2019	2019	ADIPOQ	Adiponectin, C1Q And Collagen Domain Containing	Protein Coding	45	GC03P186842	40.76	https://www.genecards.org/cgi-bin/carddisp.pl?gene=ADIPOQ	2q36.3	2:226731311-226799819	IRS1	Insulin receptor substrate-1	147545	IRS1	3667	ENSG00000169047,ENST00000305123.5		{Type 2 diabetes mellitus, susceptibility to}	125853	Autosomal dominant	3	Irs1	AGBL5
Diabetic Cardiomyopathies	C0853897	GSK3B	2932	P49841	glycogen synthase kinase 3 beta	Kinase	393	0.43	0.846	0.95571	0.02		1	2	0	2017	2019	ADRB3	Adrenoceptor Beta 3	Protein Coding	45	GC08M037962	40.66	https://www.genecards.org/cgi-bin/carddisp.pl?gene=ADRB3	2q37.3	2:240586733-240599103	CAPN10, NIDDM1	Calpain-10	605286	CAPN10	11132	ENSG00000142330,ENST00000391984.7		{Diabetes mellitus, noninsulin-dependent 1}	601283		3	Capn10	AGER
Diabetic Cardiomyopathies	C0853897	BGLAP	632	P02818	bone gamma-carboxyglutamate protein		274	0.462	0.846	4.6155E-08	0.02		1	2	0	2019	2020	ACTC1	Actin Alpha Cardiac Muscle 1	Protein Coding	42	GC15M034788	40.58	https://www.genecards.org/cgi-bin/carddisp.pl?gene=ACTC1	3p25.3	3:8733801-8746757	CAV3, LQT9, MPDT, RMD2	Caveolin-3	601253	CAV3	859	ENSG00000182533,ENST00000397368.2	within 7-10kb of OXTR	Cardiomyopathy, familial hypertrophic	192600	Autosomal dominant; Digenic dominant	3	Cav3	AGK
Diabetic Cardiomyopathies	C0853897	PIK3CD	5293	O00329	phosphatidylinositol-4,5-bisphosphate 3-kinase catalytic subunit delta	Kinase	1119	0.319	0.885	0.99999	0.02		1	2	0	2017	2019	SLC2A4	Solute Carrier Family 2 Member 4	Protein Coding	45	GC17P007295	40.56	https://www.genecards.org/cgi-bin/carddisp.pl?gene=SLC2A4	3p25.3	3:8733801-8746757	CAV3, LQT9, MPDT, RMD2	Caveolin-3	601253	CAV3	859	ENSG00000182533,ENST00000397368.2	within 7-10kb of OXTR	Creatine phosphokinase, elevated serum	123320	Autosomal dominant	3	Cav3	AGL
Diabetic Cardiomyopathies	C0853897	PIK3CA	5290	P42336	phosphatidylinositol-4,5-bisphosphate 3-kinase catalytic subunit alpha	Kinase	1511	0.292	0.923	1	0.02		1	2	0	2017	2019	HRAS	HRas Proto-Oncogene, GTPase	Protein Coding	52	GC11M000635	40.38	https://www.genecards.org/cgi-bin/carddisp.pl?gene=HRAS	3p25.3	3:8733801-8746757	CAV3, LQT9, MPDT, RMD2	Caveolin-3	601253	CAV3	859	ENSG00000182533,ENST00000397368.2	within 7-10kb of OXTR	Long QT syndrome 9	611818	Autosomal dominant	3	Cav3	AGPAT1
Diabetic Cardiomyopathies	C0853897	IAPP	3375	P10997	islet amyloid polypeptide	Signaling	183	0.507	0.808	0.0031814	0.02		1	2	0	2012	2018	IRS1	Insulin Receptor Substrate 1	Protein Coding	47	GC02M226731	40.32	https://www.genecards.org/cgi-bin/carddisp.pl?gene=IRS1	3p25.3	3:8733801-8746757	CAV3, LQT9, MPDT, RMD2	Caveolin-3	601253	CAV3	859	ENSG00000182533,ENST00000397368.2	within 7-10kb of OXTR	Myopathy, distal, Tateyama type	614321	Autosomal dominant	3	Cav3	AGPAT2
Diabetic Cardiomyopathies	C0853897	PIM1	5292	P11309	Pim-1 proto-oncogene, serine/threonine kinase	Kinase	224	0.482	0.769	0.84846	0.02		1	2	0	2011	2018	AVP	Arginine Vasopressin	Protein Coding	45	GC20M003082	39.79	https://www.genecards.org/cgi-bin/carddisp.pl?gene=AVP	3p25.3	3:8733801-8746757	CAV3, LQT9, MPDT, RMD2	Caveolin-3	601253	CAV3	859	ENSG00000182533,ENST00000397368.2	within 7-10kb of OXTR	Rippling muscle disease 2	606072	Autosomal dominant	3	Cav3	AGT
Diabetic Cardiomyopathies	C0853897	MIR22	407004		microRNA 22		195	0.496	0.808		0.02		1	2	0	2017	2018	AGPAT2	1-Acylglycerol-3-Phosphate O-Acyltransferase 2	Protein Coding	45	GC09M136673	39.47	https://www.genecards.org/cgi-bin/carddisp.pl?gene=AGPAT2	3p25.2	3:12287367-12434343	PPARG, PPARG1, PPARG2, CIMT1, GLM1	Peroxisome proliferator activated receptor, gamma	601487	PPARG	5468	ENSG00000132170,ENST00000397000.6	PPARG1, PPARG2 from same gene	[Obesity, resistance to]			3	Pparg	AGTR1
Diabetic Cardiomyopathies	C0853897	SLC2A1	6513	P11166	solute carrier family 2 member 1	Transporter	687	0.388	0.808	0.9941	0.02		1	2	0	2016	2018	TAZ	Tafazzin	Protein Coding	44	GC0XP154411	39.46	https://www.genecards.org/cgi-bin/carddisp.pl?gene=TAZ	3p25.2	3:12287367-12434343	PPARG, PPARG1, PPARG2, CIMT1, GLM1	Peroxisome proliferator activated receptor, gamma	601487	PPARG	5468	ENSG00000132170,ENST00000397000.6	PPARG1, PPARG2 from same gene	{Diabetes, type 2}	125853	Autosomal dominant	3	Pparg	AGTR2
Diabetic Cardiomyopathies	C0853897	PIK3CB	5291	P42338	phosphatidylinositol-4,5-bisphosphate 3-kinase catalytic subunit beta	Kinase	1083	0.322	0.885	0.99964	0.02		1	2	0	2017	2019	AKT1	AKT Serine/Threonine Kinase 1	Protein Coding	54	GC14M104769	39.41	https://www.genecards.org/cgi-bin/carddisp.pl?gene=AKT1	3p25.2	3:12287367-12434343	PPARG, PPARG1, PPARG2, CIMT1, GLM1	Peroxisome proliferator activated receptor, gamma	601487	PPARG	5468	ENSG00000132170,ENST00000397000.6	PPARG1, PPARG2 from same gene	Carotid intimal medial thickness 1	609338		3	Pparg	AHDC1
Diabetic Cardiomyopathies	C0853897	PDE5A	8654	O76074	phosphodiesterase 5A		187	0.513	0.731	0.00010643	0.02		1	2	0	2017	2019	CPT2	Carnitine Palmitoyltransferase 2	Protein Coding	48	GC01P053196	39.4	https://www.genecards.org/cgi-bin/carddisp.pl?gene=CPT2	3p25.2	3:12287367-12434343	PPARG, PPARG1, PPARG2, CIMT1, GLM1	Peroxisome proliferator activated receptor, gamma	601487	PPARG	5468	ENSG00000132170,ENST00000397000.6	PPARG1, PPARG2 from same gene	Insulin resistance, severe, digenic	604367	Autosomal dominant	3	Pparg	AHI1
Diabetic Cardiomyopathies	C0853897	FOXO1	2308	Q12778	forkhead box O1		380	0.433	0.846	0.99725	0.02		1	2	0	2018	2018	ADRB2	Adrenoceptor Beta 2	Protein Coding	48	GC05P148825	39.38	https://www.genecards.org/cgi-bin/carddisp.pl?gene=ADRB2	3p25.2	3:12287367-12434343	PPARG, PPARG1, PPARG2, CIMT1, GLM1	Peroxisome proliferator activated receptor, gamma	601487	PPARG	5468	ENSG00000132170,ENST00000397000.6	PPARG1, PPARG2 from same gene	Lipodystrophy, familial partial, type 3	604367	Autosomal dominant	3	Pparg	AHSA1
Diabetic Cardiomyopathies	C0853897	AKT1	207	P31749	AKT serine/threonine kinase 1	Kinase	1250	0.311	0.962	0.9759	0.02		1	2	0	2017	2018	ENPP1	Ectonucleotide Pyrophosphatase/Phosphodiesterase 1	Protein Coding	47	GC06P131808	38.15	https://www.genecards.org/cgi-bin/carddisp.pl?gene=ENPP1	3p25.2	3:12287367-12434343	PPARG, PPARG1, PPARG2, CIMT1, GLM1	Peroxisome proliferator activated receptor, gamma	601487	PPARG	5468	ENSG00000132170,ENST00000397000.6	PPARG1, PPARG2 from same gene	Obesity, severe	601665	Autosomal dominant; Autosomal recessive; Multifactorial	3	Pparg	AHSG
Diabetic Cardiomyopathies	C0853897	GRK2	156	P25098	G protein-coupled receptor kinase 2	Kinase	159	0.532	0.654	0.99998	0.02		1	2	0	2019	2020	MT-TK	Mitochondrially Encoded TRNA-Lys (AAA/G)	RNA Gene	14	GCMTP008297	37.91	https://www.genecards.org/cgi-bin/carddisp.pl?gene=MT-TK	3p25.2	3:12583600-12664116	RAF1, CRAF, NS5, CMD1NN	Oncogene RAF1	164760	RAF1	5894	ENSG00000132155,ENST00000442415.7		Cardiomyopathy, dilated, 1NN	615916	Autosomal dominant	3	Raf1	AIM2
Diabetic Cardiomyopathies	C0853897	TXNIP	10628	Q9H3M7	thioredoxin interacting protein		208	0.49	0.731	0.15918	0.02		1	2	0	2014	2016	EMD	Emerin	Protein Coding	45	GC0XP154379	37.6	https://www.genecards.org/cgi-bin/carddisp.pl?gene=EMD	3p25.2	3:12583600-12664116	RAF1, CRAF, NS5, CMD1NN	Oncogene RAF1	164760	RAF1	5894	ENSG00000132155,ENST00000442415.7		LEOPARD syndrome 2	611554		3	Raf1	AIMP2
Diabetic Cardiomyopathies	C0853897	KEAP1	9817	Q14145	kelch like ECH associated protein 1		251	0.475	0.808	0.00038766	0.02		1	2	0	2014	2019	SLC19A2	Solute Carrier Family 19 Member 2	Protein Coding	46	GC01M169463	37.58	https://www.genecards.org/cgi-bin/carddisp.pl?gene=SLC19A2	3p25.2	3:12583600-12664116	RAF1, CRAF, NS5, CMD1NN	Oncogene RAF1	164760	RAF1	5894	ENSG00000132155,ENST00000442415.7		Noonan syndrome 5	611553	Autosomal dominant	3	Raf1	AIP
Diabetic Cardiomyopathies	C0853897	TNNI3	7137	P19429	troponin I3, cardiac type	Cellular structure	159	0.52	0.769	0.096284	0.02		1	2	0	2018	2018	CTNNB1	Catenin Beta 1	Protein Coding	53	GC03P041236	37.51	https://www.genecards.org/cgi-bin/carddisp.pl?gene=CTNNB1	3p22.2	3:38548060-38649686	SCN5A, LQT3, VF1, HB1, SSS1, CMD1E, CDCD2	Sodium channel, voltage-gated, type V, alpha polypeptide	600163	SCN5A	6331	ENSG00000183873,ENST00000423572.6		{Sudden infant death syndrome, susceptibility to}	272120	Autosomal recessive	3	Scn5a	AKR1B1
Diabetic Cardiomyopathies	C0853897	FGF19	9965	O95750	fibroblast growth factor 19	Signaling	123	0.548	0.615	0.57022	0.02		1	2	0	2018	2018	LEPR	Leptin Receptor	Protein Coding	49	GC01P065421	37.5	https://www.genecards.org/cgi-bin/carddisp.pl?gene=LEPR	3p22.2	3:38548060-38649686	SCN5A, LQT3, VF1, HB1, SSS1, CMD1E, CDCD2	Sodium channel, voltage-gated, type V, alpha polypeptide	600163	SCN5A	6331	ENSG00000183873,ENST00000423572.6		Atrial fibrillation, familial, 10	614022	Autosomal dominant	3	Scn5a	AKT1
Diabetic Cardiomyopathies	C0853897	PPARG	5468	P37231	peroxisome proliferator activated receptor gamma	Nuclear receptor	877	0.358	0.885	0.029194	0.02		1	2	0	2018	2018	IGF2	Insulin Like Growth Factor 2	Protein Coding	48	GC11M002130	37.05	https://www.genecards.org/cgi-bin/carddisp.pl?gene=IGF2	3p22.2	3:38548060-38649686	SCN5A, LQT3, VF1, HB1, SSS1, CMD1E, CDCD2	Sodium channel, voltage-gated, type V, alpha polypeptide	600163	SCN5A	6331	ENSG00000183873,ENST00000423572.6		Brugada syndrome 1	601144	Autosomal dominant	3	Scn5a	AKT2
Diabetic Cardiomyopathies	C0853897	ATP6AP2	10159	O75787	ATPase H+ transporting accessory protein 2	Receptor	184	0.525	0.769	0.87089	0.02		1	2	0	2013	2019	FXN	Frataxin	Protein Coding	46	GC09P069035	36.89	https://www.genecards.org/cgi-bin/carddisp.pl?gene=FXN	3p22.2	3:38548060-38649686	SCN5A, LQT3, VF1, HB1, SSS1, CMD1E, CDCD2	Sodium channel, voltage-gated, type V, alpha polypeptide	600163	SCN5A	6331	ENSG00000183873,ENST00000423572.6		Cardiomyopathy, dilated, 1E	601154	Autosomal dominant	3	Scn5a	ALAS1
Diabetic Cardiomyopathies	C0853897	MIR451A	574411		microRNA 451a		177	0.505	0.769		0.01		1	1	0	2019	2019	GNAS	GNAS Complex Locus	Protein Coding	50	GC20P058839	36.63	https://www.genecards.org/cgi-bin/carddisp.pl?gene=GNAS	3p22.2	3:38548060-38649686	SCN5A, LQT3, VF1, HB1, SSS1, CMD1E, CDCD2	Sodium channel, voltage-gated, type V, alpha polypeptide	600163	SCN5A	6331	ENSG00000183873,ENST00000423572.6		Heart block, nonprogressive	113900	Autosomal dominant	3	Scn5a	ALAS2
Diabetic Cardiomyopathies	C0853897	DIRAS3	9077	O95661	DIRAS family GTPase 3	Enzyme modulator	52	0.631	0.385		0.01		1	1	0	2017	2017	FN1	Fibronectin 1	Protein Coding	50	GC02M215360	36.49	https://www.genecards.org/cgi-bin/carddisp.pl?gene=FN1	3p22.2	3:38548060-38649686	SCN5A, LQT3, VF1, HB1, SSS1, CMD1E, CDCD2	Sodium channel, voltage-gated, type V, alpha polypeptide	600163	SCN5A	6331	ENSG00000183873,ENST00000423572.6		Heart block, progressive, type IA	113900	Autosomal dominant	3	Scn5a	ALB
Diabetic Cardiomyopathies	C0853897	TAX1BP1	8887	Q86VP1	Tax1 binding protein 1		16	0.792	0.423	1.2061E-07	0.01		1	1	0	2018	2018	CRYAB	Crystallin Alpha B	Protein Coding	45	GC11M111908	36.25	https://www.genecards.org/cgi-bin/carddisp.pl?gene=CRYAB	3p22.2	3:38548060-38649686	SCN5A, LQT3, VF1, HB1, SSS1, CMD1E, CDCD2	Sodium channel, voltage-gated, type V, alpha polypeptide	600163	SCN5A	6331	ENSG00000183873,ENST00000423572.6		Long QT syndrome 3	603830	Autosomal dominant	3	Scn5a	ALDH2
Diabetic Cardiomyopathies	C0853897	APLN	8862	Q9ULZ1	apelin		226	0.497	0.769	0.45897	0.01		1	1	0	2010	2010	PNPLA2	Patatin Like Phospholipase Domain Containing 2	Protein Coding	44	GC11P000896	36.05	https://www.genecards.org/cgi-bin/carddisp.pl?gene=PNPLA2	3p22.2	3:38548060-38649686	SCN5A, LQT3, VF1, HB1, SSS1, CMD1E, CDCD2	Sodium channel, voltage-gated, type V, alpha polypeptide	600163	SCN5A	6331	ENSG00000183873,ENST00000423572.6		Sick sinus syndrome 1	608567	Autosomal recessive	3	Scn5a	ALMS1
Diabetic Cardiomyopathies	C0853897	MAPK8	5599	P45983	mitogen-activated protein kinase 8	Kinase	520	0.397	0.885	0.99823	0.01		1	1	0	2017	2017	MIR21	MicroRNA 21	RNA Gene	24	GC17P059841	36.04	https://www.genecards.org/cgi-bin/carddisp.pl?gene=MIR21	3p22.2	3:38548060-38649686	SCN5A, LQT3, VF1, HB1, SSS1, CMD1E, CDCD2	Sodium channel, voltage-gated, type V, alpha polypeptide	600163	SCN5A	6331	ENSG00000183873,ENST00000423572.6		Ventricular fibrillation, familial, 1	603829		3	Scn5a	ALMS1P1
Diabetic Cardiomyopathies	C0853897	NR1I2	8856	O75469	nuclear receptor subfamily 1 group I member 2	Nuclear receptor	462	0.418	0.846	7.2668E-09	0.01		1	1	0	2013	2013	LAMP2	Lysosomal Associated Membrane Protein 2	Protein Coding	44	GC0XM120426	35.98	https://www.genecards.org/cgi-bin/carddisp.pl?gene=LAMP2	3p22.2	3:39183213-39192620	CMYA1, XIN	Cardiomyopathy-associated protein 1	609777	XIRP1	165904	ENSG00000168334,ENST00000396251.1					Xirp1		ALOX12
Diabetic Cardiomyopathies	C0853897	RETN	56729	Q9HD89	resistin		302	0.454	0.808	0.036545	0.01		1	1	0	2018	2018	GATA6	GATA Binding Protein 6	Protein Coding	47	GC18P022169	35.91	https://www.genecards.org/cgi-bin/carddisp.pl?gene=GATA6	3p21.31	3:46370141-46376205	CCR5, CMKBR5, CCCKR5, IDDM22	Chemokine (C-C) receptor 5	601373	CCR5	1234	ENSG00000160791,ENST00000292303.4		{Diabetes mellitus, insulin-dependent, 22}	612522		3	Ccr5	Alox15
Diabetic Cardiomyopathies	C0853897	MIR503	574506		microRNA 503		111	0.551	0.808		0.01		1	1	0	2017	2017	FOS	Fos Proto-Oncogene, AP-1 Transcription Factor Subunit	Protein Coding	50	GC14P075278	35.76	https://www.genecards.org/cgi-bin/carddisp.pl?gene=FOS	3p21.31	3:46370141-46376205	CCR5, CMKBR5, CCCKR5, IDDM22	Chemokine (C-C) receptor 5	601373	CCR5	1234	ENSG00000160791,ENST00000292303.4		{Hepatitis C virus, resistance to}	609532		3	Ccr5	ALPK3
Diabetic Cardiomyopathies	C0853897	PRKCD	5580	Q05655	protein kinase C delta	Kinase	287	0.48	0.846	0.99995	0.01		1	1	0	2018	2018	POMC	Proopiomelanocortin	Protein Coding	48	GC02M025160	35.7	https://www.genecards.org/cgi-bin/carddisp.pl?gene=POMC	3p21.31	3:46370141-46376205	CCR5, CMKBR5, CCCKR5, IDDM22	Chemokine (C-C) receptor 5	601373	CCR5	1234	ENSG00000160791,ENST00000292303.4		{HIV infection, susceptibility/resistance to}			3	Ccr5	ALPS5
Diabetic Cardiomyopathies	C0853897	CERS5	91012	Q8N5B7	ceramide synthase 5		12	0.839	0.231	6.4962E-09	0.01		1	1	0	2018	2018	JUP	Junction Plakoglobin	Protein Coding	47	GC17M041754	35.4	https://www.genecards.org/cgi-bin/carddisp.pl?gene=JUP	3p21.31	3:46370141-46376205	CCR5, CMKBR5, CCCKR5, IDDM22	Chemokine (C-C) receptor 5	601373	CCR5	1234	ENSG00000160791,ENST00000292303.4		{West nile virus, susceptibility to}	610379		3	Ccr5	AMACR
Diabetic Cardiomyopathies	C0853897	LONP1	9361	P36776	lon peptidase 1, mitochondrial	Enzyme	197	0.517	0.808	0.9993	0.01		1	1	0	2011	2011	MT-CO1	Mitochondrially Encoded Cytochrome C Oxidase I	Protein Coding	32	GCMTP005906	35.29	https://www.genecards.org/cgi-bin/carddisp.pl?gene=MT-CO1	3p21.31	3:46857871-46863443	MYL3, CMH8	Myosin, light polypeptide-3, alkali; ventricular, skeletal, slow	160790	MYL3	4634	ENSG00000160808,ENST00000292327.6		Cardiomyopathy, hypertrophic, 8	608751	Autosomal dominant; Autosomal recessive	3	Myl3	AMBP
Diabetic Cardiomyopathies	C0853897	MED13	9969	Q9UHV7	mediator complex subunit 13		29	0.711	0.538	1	0.01		1	1	0	2018	2018	MIR146A	MicroRNA 146a	RNA Gene	22	GC05P160485	35.25	https://www.genecards.org/cgi-bin/carddisp.pl?gene=MIR146A	3p21.1	3:52451099-52454040	TNNC1, CMD1Z, CMH13	Troponin-C1, slow	191040	TNNC1	7134	ENSG00000114854,ENST00000232975.8		Cardiomyopathy, dilated, 1Z	611879		3	Tnnc1	AMPD1
Diabetic Cardiomyopathies	C0853897	ELMO1	9844	Q92556	engulfment and cell motility 1	Signaling	72	0.608	0.615	0.89997	0.01		1	1	0	2019	2019	MYL2	Myosin Light Chain 2	Protein Coding	49	GC12M110910	34.99	https://www.genecards.org/cgi-bin/carddisp.pl?gene=MYL2	3p21.1	3:52451099-52454040	TNNC1, CMD1Z, CMH13	Troponin-C1, slow	191040	TNNC1	7134	ENSG00000114854,ENST00000232975.8		Cardiomyopathy, hypertrophic, 13	613243	Autosomal dominant	3	Tnnc1	ANGPT2
Diabetic Cardiomyopathies	C0853897	CD36	948	P16671	CD36 molecule	Receptor	351	0.446	0.846	1.0857E-60	0.01		1	1	0	2019	2019	AKT2	AKT Serine/Threonine Kinase 2	Protein Coding	54	GC19M040230	34.23	https://www.genecards.org/cgi-bin/carddisp.pl?gene=AKT2	3p14.3	3:57227728-57273470	APPL1, APPL, MODY14	Adaptor protein containing PH domain, PTB domain, and leucine zipper motif 1	604299	APPL1	26060	ENSG00000157500,ENST00000288266.8		{Maturity-onset diabetes of the young, type 14}	616511	Autosomal dominant	3	Appl1	ANGPTL4
Diabetic Cardiomyopathies	C0853897	APRT	353	P07741	adenine phosphoribosyltransferase		384	0.423	0.846	5.4539E-13	0.01		1	1	0	2019	2019	MT-ND4	Mitochondrially Encoded NADH:Ubiquinone Oxidoreductase Core Subunit 4	Protein Coding	31	GCMTP010762	34.19	https://www.genecards.org/cgi-bin/carddisp.pl?gene=MT-ND4	3q26.2	3:170996340-171026720	SLC2A2, GLUT2	Solute carrier family 2 (facilitated glucose transporter), member 2	138160	SLC2A2	6514	ENSG00000163581,ENST00000314251.8		{Diabetes mellitus, noninsulin-dependent}	125853	Autosomal dominant	3	Slc2a2	ANGPTL8
Diabetic Cardiomyopathies	C0853897	AIM2	9447	O14862	absent in melanoma 2		167	0.521	0.769	2.1942E-09	0.01		1	1	0	2019	2019	IFIH1	Interferon Induced With Helicase C Domain 1	Protein Coding	47	GC02M162267	34.08	https://www.genecards.org/cgi-bin/carddisp.pl?gene=IFIH1	3q26.2	3:170996340-171026720	SLC2A2, GLUT2	Solute carrier family 2 (facilitated glucose transporter), member 2	138160	SLC2A2	6514	ENSG00000163581,ENST00000314251.8		Fanconi-Bickel syndrome	227810	Autosomal recessive	3	Slc2a2	ANK2
Diabetic Cardiomyopathies	C0853897	PTPA	5524	Q15257	protein phosphatase 2 phosphatase activator	Enzyme modulator	245	0.48	0.846	0.99057	0.01		1	1	0	2019	2019	MT-ATP6	Mitochondrially Encoded ATP Synthase Membrane Subunit 6	Protein Coding	31	GCMTP008531	34.05	https://www.genecards.org/cgi-bin/carddisp.pl?gene=MT-ATP6	3q27.2	3:185643129-185825045	IGF2BP2, IMP2	Insulin-like growth factor 2 mRNA-binding protein 2	608289	IGF2BP2	10644	ENSG00000073792,ENST00000346192.7		{Diabetes mellitus, noninsulin-dependent, susceptibility to}	125853	Autosomal dominant	3	Igf2bp2	ANK3
Diabetic Cardiomyopathies	C0853897	GRAP2	9402	O75791	GRB2 related adaptor protein 2		538	0.394	0.923	0.00015256	0.01		1	1	0	2019	2019	EYA4	EYA Transcriptional Coactivator And Phosphatase 4	Protein Coding	43	GC06P133240	33.85	https://www.genecards.org/cgi-bin/carddisp.pl?gene=EYA4	4p16.1	4:6260367-6303264	WFS1, WFRS, WFS, DFNA6, DFNA14, DFNA38, WFSL, CTRCT41	Wolframin	606201	WFS1	7466	ENSG00000109501,ENST00000503569.5	mutation identified in 1 CTRCT41 family	?Cataract 41	116400	Autosomal dominant	3	Wfs1	ANKRD1
Diabetic Cardiomyopathies	C0853897	KL	9365	Q9UEF7	klotho	Enzyme	332	0.448	0.769	0.00022444	0.01		1	1	0	2019	2019	SLC25A4	Solute Carrier Family 25 Member 4	Protein Coding	48	GC04P185143	33.8	https://www.genecards.org/cgi-bin/carddisp.pl?gene=SLC25A4	4p16.1	4:6260367-6303264	WFS1, WFRS, WFS, DFNA6, DFNA14, DFNA38, WFSL, CTRCT41	Wolframin	606201	WFS1	7466	ENSG00000109501,ENST00000503569.5	mutation identified in 1 CTRCT41 family	{Diabetes mellitus, noninsulin-dependent, association with}	125853	Autosomal dominant	3	Wfs1	ANKS6
Diabetic Cardiomyopathies	C0853897	KLF4	9314	O43474	Kruppel like factor 4	Nucleic acid binding	307	0.449	0.769	0.99714	0.01		1	1	0	2019	2019	EIF2AK3	Eukaryotic Translation Initiation Factor 2 Alpha Kinase 3	Protein Coding	48	GC02M088637	33.52	https://www.genecards.org/cgi-bin/carddisp.pl?gene=EIF2AK3	4p16.1	4:6260367-6303264	WFS1, WFRS, WFS, DFNA6, DFNA14, DFNA38, WFSL, CTRCT41	Wolframin	606201	WFS1	7466	ENSG00000109501,ENST00000503569.5	mutation identified in 1 CTRCT41 family	Deafness, autosomal dominant 6/14/38	600965	Autosomal dominant	3	Wfs1	ANO5
Diabetic Cardiomyopathies	C0853897	MTDH	92140	Q86UE4	metadherin		200	0.491	0.769	0.32924	0.01		1	1	0	2019	2019	DES	Desmin	Protein Coding	48	GC02P219418	33.46	https://www.genecards.org/cgi-bin/carddisp.pl?gene=DES	4p16.1	4:6260367-6303264	WFS1, WFRS, WFS, DFNA6, DFNA14, DFNA38, WFSL, CTRCT41	Wolframin	606201	WFS1	7466	ENSG00000109501,ENST00000503569.5	mutation identified in 1 CTRCT41 family	Wolfram syndrome 1	222300	Autosomal recessive	3	Wfs1	ANPEP
Diabetic Cardiomyopathies	C0853897	XPR1	9213	Q9UBH6	xenotropic and polytropic retrovirus receptor 1	Transporter	217	0.488	0.731	0.99999	0.01		1	1	0	2019	2019	RAF1	Raf-1 Proto-Oncogene, Serine/Threonine Kinase	Protein Coding	54	GC03M012583	33.45	https://www.genecards.org/cgi-bin/carddisp.pl?gene=RAF1	4p16.1	4:6260367-6303264	WFS1, WFRS, WFS, DFNA6, DFNA14, DFNA38, WFSL, CTRCT41	Wolframin	606201	WFS1	7466	ENSG00000109501,ENST00000503569.5	mutation identified in 1 CTRCT41 family	Wolfram-like syndrome, autosomal dominant	614296	Autosomal dominant	3	Wfs1	ANXA5
Diabetic Cardiomyopathies	C0853897	NECTIN1	5818	Q15223	nectin cell adhesion molecule 1		196	0.523	0.808	0.061154	0.01		1	1	0	2013	2013	MAP2K1	Mitogen-Activated Protein Kinase Kinase 1	Protein Coding	54	GC15P066386	33.35	https://www.genecards.org/cgi-bin/carddisp.pl?gene=MAP2K1	4q26	4:119135831-119187788	MYOZ2, CMH16	Myozenin 2	605602	MYOZ2	51778	ENSG00000172399,ENST00000307128.5		Cardiomyopathy, hypertrophic, 16	613838	Autosomal dominant	3	Myoz2	AOC3
Diabetic Cardiomyopathies	C0853897	RAP1A	5906	P62834	RAP1A, member of RAS oncogene family	Enzyme modulator	215	0.502	0.808	0.62227	0.01		1	1	0	2017	2017	PTPN22	Protein Tyrosine Phosphatase Non-Receptor Type 22	Protein Coding	46	GC01M113813	33.32	https://www.genecards.org/cgi-bin/carddisp.pl?gene=PTPN22	4q27	4:119900000-122800000	IDDM23	Diabetes mellitus, insulin-dependent, 23	612622		100271697		associated with rs6534347	{Diabetes mellitus, insulin-dependent, 23}	612622		2		APLN
Diabetic Cardiomyopathies	C0853897	HDAC3	8841	O15379	histone deacetylase 3	Epigenetic regulator	179	0.511	0.731	0.56737	0.01		1	1	0	2017	2017	CRP	C-Reactive Protein	Protein Coding	46	GC01M159716	33.24	https://www.genecards.org/cgi-bin/carddisp.pl?gene=CRP	5p15.33	5:218308-264815	SDHA, SDH1, SDHF, CMD1GG, PGL5	Succinate dehydrogenase complex, subunit A, flavoprotein	600857	SDHA	6389	ENSG00000073578,ENST00000510361.5	copy on 3q29	Cardiomyopathy, dilated, 1GG	613642	Autosomal recessive	3	Sdha	APLNR
Diabetic Cardiomyopathies	C0853897	BEST1	7439	O76090	bestrophin 1	Ion channel	292	0.465	0.885	1.8214E-12	0.01		1	1	0	2013	2013	CAV3	Caveolin 3	Protein Coding	43	GC03P008733	33.22	https://www.genecards.org/cgi-bin/carddisp.pl?gene=CAV3	5p15.33	5:218308-264815	SDHA, SDH1, SDHF, CMD1GG, PGL5	Succinate dehydrogenase complex, subunit A, flavoprotein	600857	SDHA	6389	ENSG00000073578,ENST00000510361.5	copy on 3q29	Leigh syndrome	256000	Autosomal recessive; Mitochondrial	3	Sdha	APOA1
Diabetic Cardiomyopathies	C0853897	VEGFB	7423	P49765	vascular endothelial growth factor B	Signaling	82	0.592	0.615	1.3114E-09	0.01		1	1	0	2017	2017	SDHA	Succinate Dehydrogenase Complex Flavoprotein Subunit A	Protein Coding	46	GC05P000208	33.1	https://www.genecards.org/cgi-bin/carddisp.pl?gene=SDHA	5p15.33	5:218308-264815	SDHA, SDH1, SDHF, CMD1GG, PGL5	Succinate dehydrogenase complex, subunit A, flavoprotein	600857	SDHA	6389	ENSG00000073578,ENST00000510361.5	copy on 3q29	Mitochondrial respiratory chain complex II deficiency	252011	Autosomal recessive	3	Sdha	APOA2
Diabetic Cardiomyopathies	C0853897	VEGFA	7422	P15692	vascular endothelial growth factor A	Signaling	1899	0.266	0.923	0.000024085	0.01		1	1	0	2018	2018	PLIN1	Perilipin 1	Protein Coding	44	GC15M089664	32.94	https://www.genecards.org/cgi-bin/carddisp.pl?gene=PLIN1	5p15.33	5:218308-264815	SDHA, SDH1, SDHF, CMD1GG, PGL5	Succinate dehydrogenase complex, subunit A, flavoprotein	600857	SDHA	6389	ENSG00000073578,ENST00000510361.5	copy on 3q29	Paragangliomas 5	614165	Autosomal dominant	3	Sdha	APOA4
Diabetic Cardiomyopathies	C0853897	TLR2	7097	O60603	toll like receptor 2		749	0.361	0.923	1.0152E-06	0.01		1	1	0	2018	2018	IGF2BP2	Insulin Like Growth Factor 2 MRNA Binding Protein 2	Protein Coding	44	GC03M185643	32.89	https://www.genecards.org/cgi-bin/carddisp.pl?gene=IGF2BP2	5q14.1	5:79689338-79800225	CMYA5, MYOSPRYN, TRIM76	Cardiomyopathy-associated protein 5	612193	CMYA5	202333	ENSG00000164309,ENST00000446378.3							APOB
Diabetic Cardiomyopathies	C0853897	VDR	7421	P11473	vitamin D receptor	Nuclear receptor	852	0.352	0.885	0.000016787	0.01		1	1	0	2017	2017	BRAF	B-Raf Proto-Oncogene, Serine/Threonine Kinase	Protein Coding	54	GC07M140719	32.85	https://www.genecards.org/cgi-bin/carddisp.pl?gene=BRAF	5q31.1-q33.1	5:131200000-153300000	IDDM18	Insulin-dependent diabetes mellitus-18	605598		57044		close to IL12B	{Diabetes mellitus, insulin-dependent, 18}	605598		2		APOC3
Diabetic Cardiomyopathies	C0853897	VDAC1	7416	P21796	voltage dependent anion channel 1		116	0.556	0.654	0.97266	0.01		1	1	0	2016	2016	CP	Ceruloplasmin	Protein Coding	47	GC03M149162	32.81	https://www.genecards.org/cgi-bin/carddisp.pl?gene=CP	5q32	5:147824581-147839195	SPINK1, PSTI, PCTT, TATI, TCP	Serine protease inhibitor, Kazal type I (pancreatic secretory trypsin inhibitor)	167790	SPINK1	6690	ENSG00000164266,ENST00000296695.9		{Fibrocalculous pancreatic diabetes, susceptibility to}	608189	Autosomal dominant; Autosomal recessive	3	Spink1	APOD
Diabetic Cardiomyopathies	C0853897	CCR2	729230	P41597	C-C motif chemokine receptor 2		436	0.418	0.846	0.023412	0.01		1	1	0	2019	2019	ZFP57	ZFP57 Zinc Finger Protein	Protein Coding	39	GC06M029672	32.79	https://www.genecards.org/cgi-bin/carddisp.pl?gene=ZFP57	5q32	5:147824581-147839195	SPINK1, PSTI, PCTT, TATI, TCP	Serine protease inhibitor, Kazal type I (pancreatic secretory trypsin inhibitor)	167790	SPINK1	6690	ENSG00000164266,ENST00000296695.9		Pancreatitis, hereditary	167800	Autosomal dominant	3	Spink1	APOE
Diabetic Cardiomyopathies	C0853897	TP53	7157	P04637	tumor protein p53	Transcription factor	2494	0.236	0.962	0.53235	0.01		1	1	0	2018	2018	CSRP3	Cysteine And Glycine Rich Protein 3	Protein Coding	41	GC11M019160	32.7	https://www.genecards.org/cgi-bin/carddisp.pl?gene=CSRP3	5q32	5:147824581-147839195	SPINK1, PSTI, PCTT, TATI, TCP	Serine protease inhibitor, Kazal type I (pancreatic secretory trypsin inhibitor)	167790	SPINK1	6690	ENSG00000164266,ENST00000296695.9		Tropical calcific pancreatitis	608189	Autosomal dominant; Autosomal recessive	3	Spink1	APOH
Diabetic Cardiomyopathies	C0853897	STAT3	6774	P40763	signal transducer and activator of transcription 3	Nucleic acid binding	1193	0.32	0.923	1	0.01		1	1	0	2019	2019	BAG3	BAG Cochaperone 3	Protein Coding	44	GC10P119651	32.01	https://www.genecards.org/cgi-bin/carddisp.pl?gene=BAG3	5q33.2-q33.3	5:155728635-156767787	SGCD, SGD, LGMDR6, CMD1L	Sarcoglycan, delta (35kD dystrophin-associated glycoprotein)	601411	SGCD	6444	ENSG00000170624,ENST00000337851.8	mutant in Syrian hamster cardiomyopathy	Cardiomyopathy, dilated, 1L	606685		3	Sgcd	APP
Diabetic Cardiomyopathies	C0853897	TLR3	7098	O15455	toll like receptor 3	Receptor	393	0.427	0.885	1.6349E-07	0.01		1	1	0	2019	2019	GHR	Growth Hormone Receptor	Protein Coding	47	GC05P042429	31.93	https://www.genecards.org/cgi-bin/carddisp.pl?gene=GHR	5q33.2-q33.3	5:155728635-156767787	SGCD, SGD, LGMDR6, CMD1L	Sarcoglycan, delta (35kD dystrophin-associated glycoprotein)	601411	SGCD	6444	ENSG00000170624,ENST00000337851.8	mutant in Syrian hamster cardiomyopathy	Muscular dystrophy, limb-girdle, autosomal recessive 6	601287	Autosomal recessive	3	Sgcd	APPL
Diabetic Cardiomyopathies	C0853897	TGFB1	7040	P01137	transforming growth factor beta 1	Signaling	1558	0.287	0.962	0.03685	0.01		1	1	0	2018	2018	VCL	Vinculin	Protein Coding	47	GC10P073995	31.93	https://www.genecards.org/cgi-bin/carddisp.pl?gene=VCL	5q34-q35.2	5:160500000-177100000	NIDDM4	Diabetes mellitus, noninsulin-dependent, 4	608036		100188782			{Diabetes mellitus, noninsulin-dependent}	125853	Autosomal dominant	2		APPL1
Diabetic Cardiomyopathies	C0853897	MIR551B	693136		microRNA 551b		31	0.682	0.538		0.01		1	1	0	2019	2019	HAMP	Hepcidin Antimicrobial Peptide	Protein Coding	44	GC19P038216	31.81	https://www.genecards.org/cgi-bin/carddisp.pl?gene=HAMP	6p24.3	6:7541670-7586713	DSP, KPPS2, PPKS2, DCWHKTA	Desmoplakin	125647	DSP	1832	ENSG00000096696,ENST00000418664.2	splice variants result in DP I and DP II	Arrhythmogenic right ventricular dysplasia 8	607450	Autosomal dominant	3	Dsp	APRT
Diabetic Cardiomyopathies	C0853897	AIMP2	7965	Q13155	aminoacyl tRNA synthetase complex interacting multifunctional protein 2		555	0.393	0.923	0.008024	0.01		1	1	0	2019	2019	MT-CO2	Mitochondrially Encoded Cytochrome C Oxidase II	Protein Coding	32	GCMTP007587	31.71	https://www.genecards.org/cgi-bin/carddisp.pl?gene=MT-CO2	6p24.3	6:7541670-7586713	DSP, KPPS2, PPKS2, DCWHKTA	Desmoplakin	125647	DSP	1832	ENSG00000096696,ENST00000418664.2	splice variants result in DP I and DP II	Cardiomyopathy, dilated, with woolly hair and keratoderma	605676	Autosomal recessive	3	Dsp	APTX
Diabetic Cardiomyopathies	C0853897	SGK1	6446	O00141	serum/glucocorticoid regulated kinase 1	Kinase	188	0.506	0.769	0.0023046	0.01		1	1	0	2020	2020	PTPN11	Protein Tyrosine Phosphatase Non-Receptor Type 11	Protein Coding	53	GC12P112418	31.62	https://www.genecards.org/cgi-bin/carddisp.pl?gene=PTPN11	6p24.3	6:7541670-7586713	DSP, KPPS2, PPKS2, DCWHKTA	Desmoplakin	125647	DSP	1832	ENSG00000096696,ENST00000418664.2	splice variants result in DP I and DP II	Dilated cardiomyopathy with woolly hair, keratoderma, and tooth agenesis	615821	Autosomal dominant	3	Dsp	AQP1
Diabetic Cardiomyopathies	C0853897	LIN28A	79727	Q9H9Z2	lin-28 homolog A	Nucleic acid binding	161	0.523	0.731	0.019369	0.01		1	1	0	2020	2020	FOXP3	Forkhead Box P3	Protein Coding	46	GC0XM049250	31.49	https://www.genecards.org/cgi-bin/carddisp.pl?gene=FOXP3	6p24.3	6:7541670-7586713	DSP, KPPS2, PPKS2, DCWHKTA	Desmoplakin	125647	DSP	1832	ENSG00000096696,ENST00000418664.2	splice variants result in DP I and DP II	Epidermolysis bullosa, lethal acantholytic	609638	Autosomal recessive	3	Dsp	AQP2
Diabetic Cardiomyopathies	C0853897	BECN1	8678	Q14457	beclin 1	Enzyme modulator	373	0.432	0.846	0.93717	0.01		1	1	0	2017	2017	FTO	FTO Alpha-Ketoglutarate Dependent Dioxygenase	Protein Coding	44	GC16P053737	31.48	https://www.genecards.org/cgi-bin/carddisp.pl?gene=FTO	6p24.3	6:7541670-7586713	DSP, KPPS2, PPKS2, DCWHKTA	Desmoplakin	125647	DSP	1832	ENSG00000096696,ENST00000418664.2	splice variants result in DP I and DP II	Keratosis palmoplantaris striata II	612908	Autosomal dominant	3	Dsp	AQP4
Diabetic Cardiomyopathies	C0853897	NR1H4	9971	Q96RI1	nuclear receptor subfamily 1 group H member 4	Nuclear receptor	187	0.513	0.808	0.00093892	0.01		1	1	0	2019	2019	ACADVL	Acyl-CoA Dehydrogenase Very Long Chain	Protein Coding	45	GC17P007219	31.46	https://www.genecards.org/cgi-bin/carddisp.pl?gene=ACADVL	6p24.3	6:7541670-7586713	DSP, KPPS2, PPKS2, DCWHKTA	Desmoplakin	125647	DSP	1832	ENSG00000096696,ENST00000418664.2	splice variants result in DP I and DP II	Skin fragility-woolly hair syndrome	607655	Autosomal recessive	3	Dsp	AQR
Diabetic Cardiomyopathies	C0853897	CAV3	859	P56539	caveolin 3	Enzyme modulator	163	0.564	0.692	0.0054565	0.01		1	1	0	2015	2015	LPL	Lipoprotein Lipase	Protein Coding	49	GC08P019901	31.41	https://www.genecards.org/cgi-bin/carddisp.pl?gene=LPL	6p22.2	6:26087346-26098342	HFE, HLA-H, HFE1, MVCD7, TFQTL2	Homeostatic iron regulator	613609	HFE	3077	ENSG00000010704,ENST00000357618.9		[Transferrin serum level QTL2]	614193		3	Hfe	AR
Diabetic Cardiomyopathies	C0853897	RENBP	5973	P51606	renin binding protein	Enzyme	156	0.528	0.769	0.44916	0.01		1	1	0	2018	2018	PSEN1	Presenilin 1	Protein Coding	52	GC14P073136	31.35	https://www.genecards.org/cgi-bin/carddisp.pl?gene=PSEN1	6p22.2	6:26087346-26098342	HFE, HLA-H, HFE1, MVCD7, TFQTL2	Homeostatic iron regulator	613609	HFE	3077	ENSG00000010704,ENST00000357618.9		{Alzheimer disease, susceptibility to}	104300	Autosomal dominant	3	Hfe	ARAF
Diabetic Cardiomyopathies	C0853897	RLN2	6019	P04090	relaxin 2	Signaling	54	0.626	0.615	0.00090025	0.01		1	1	0	2017	2017	MT-TE	Mitochondrially Encoded TRNA-Glu (GAA/G)	RNA Gene	12	GCMTM014676	31.14	https://www.genecards.org/cgi-bin/carddisp.pl?gene=MT-TE	6p22.2	6:26087346-26098342	HFE, HLA-H, HFE1, MVCD7, TFQTL2	Homeostatic iron regulator	613609	HFE	3077	ENSG00000010704,ENST00000357618.9		{Microvascular complications of diabetes 7}	612635		3	Hfe	ARG1
Diabetic Cardiomyopathies	C0853897	BCL6	604	P41182	BCL6 transcription repressor		309	0.444	0.808	0.96038	0.01		1	1	0	2018	2018	MMP2	Matrix Metallopeptidase 2	Protein Coding	53	GC16P055390	31.13	https://www.genecards.org/cgi-bin/carddisp.pl?gene=MMP2	6p22.2	6:26087346-26098342	HFE, HLA-H, HFE1, MVCD7, TFQTL2	Homeostatic iron regulator	613609	HFE	3077	ENSG00000010704,ENST00000357618.9		{Porphyria cutanea tarda, susceptibility to}	176100	Autosomal dominant; Autosomal recessive	3	Hfe	ARHR2
Diabetic Cardiomyopathies	C0853897	ROS1	6098	P08922	ROS proto-oncogene 1, receptor tyrosine kinase	Kinase	356	0.439	0.885	1.6184E-72	0.01		1	1	0	2017	2017	MIR29A	MicroRNA 29a	RNA Gene	21	GC07M130876	30.89	https://www.genecards.org/cgi-bin/carddisp.pl?gene=MIR29A	6p22.2	6:26087346-26098342	HFE, HLA-H, HFE1, MVCD7, TFQTL2	Homeostatic iron regulator	613609	HFE	3077	ENSG00000010704,ENST00000357618.9		{Porphyria variegata, susceptibility to}	176200	Autosomal dominant	3	Hfe	ARMC5
Diabetic Cardiomyopathies	C0853897	RPS6KA1	6195	Q15418	ribosomal protein S6 kinase A1	Kinase	68	0.619	0.654	0.0019056	0.01		1	1	0	2019	2019	CPT1A	Carnitine Palmitoyltransferase 1A	Protein Coding	48	GC11M068754	30.8	https://www.genecards.org/cgi-bin/carddisp.pl?gene=CPT1A	6p22.2	6:26087346-26098342	HFE, HLA-H, HFE1, MVCD7, TFQTL2	Homeostatic iron regulator	613609	HFE	3077	ENSG00000010704,ENST00000357618.9		Hemochromatosis	235200	Autosomal recessive	3	Hfe	ARNT2
Diabetic Cardiomyopathies	C0853897	ST3GAL4	6484	Q11206	ST3 beta-galactoside alpha-2,3-sialyltransferase 4		115	0.588	0.692	0.039802	0.01		1	1	0	2019	2019	GJA1	Gap Junction Protein Alpha 1	Protein Coding	50	GC06P121436	30.74	https://www.genecards.org/cgi-bin/carddisp.pl?gene=GJA1	6p22.1	6:29672391-29681151	ZFP57, TNDM1	Zinc finger protein 57, mouse, homolog of	612192	ZFP57	346171	ENSG00000204644,ENST00000376883.1		Diabetes mellitus, transient neonatal 1	601410	Autosomal dominant	3	Zfp57	ARNTL
Diabetic Cardiomyopathies	C0853897	CEACAM1	634	P13688	CEA cell adhesion molecule 1		167	0.525	0.731	0.00078816	0.01		1	1	0	2019	2019	AGT	Angiotensinogen	Protein Coding	49	GC01M230702	30.64	https://www.genecards.org/cgi-bin/carddisp.pl?gene=AGT	6p21.3	6:30500000-36600000	IDDM1	Insulin-dependent diabetes mellitus-1	222100				linkage or association, with HLA	{Diabetes mellitus, insulin-dependent-1}	222100	Autosomal recessive	2		ARSA
Diabetic Cardiomyopathies	C0853897	GSDMD	79792	P57764	gasdermin D		50	0.641	0.692	1.0789E-13	0.01		1	1	0	2019	2019	HLA-B	Major Histocompatibility Complex, Class I, B	Protein Coding	45	GC06M031315	30.45	https://www.genecards.org/cgi-bin/carddisp.pl?gene=HLA-B	6p21.3	6:30500000-36600000	PBCA	Pancreatic beta cell, agenesis of	600089		7962		uniparental disomy	?Diabetes mellitus, insulin-dependent, neonatal	600089	Autosomal recessive	2		ARVC10
Diabetic Cardiomyopathies	C0853897	NOD2	64127	Q9HC29	nucleotide binding oligomerization domain containing 2	Enzyme	434	0.423	0.923	1.9834E-30	0.01		1	1	0	2018	2018	GHRL	Ghrelin And Obestatin Prepropeptide	Protein Coding	43	GC03M010285	30.29	https://www.genecards.org/cgi-bin/carddisp.pl?gene=GHRL	6p21.31	6:33621321-33696561	ITPR3	Inositol 1,4,5-triphosphate receptor, type 3	147267	ITPR3	3710	ENSG00000096433,ENST00000605930.3		{Diabetes, type 1, susceptibility to}	222100	Autosomal recessive	2	Itpr3	ARVD10
Diabetic Cardiomyopathies	C0853897	HNF1A	6927	P20823	HNF1 homeobox A	Nucleic acid binding	292	0.478	0.846	0.96115	0.01		1	1	0	2016	2016	GLA	Galactosidase Alpha	Protein Coding	48	GC0XM101393	30.26	https://www.genecards.org/cgi-bin/carddisp.pl?gene=GLA	6p21.31	6:34236872-34246230	HMGA1, HMGIY	High-mobility group AT-hook 1	600701	HMGA1	3159	ENSG00000137309,ENST00000401473.7		{Type 2 diabetes mellitus, susceptibility to}	125853	Autosomal dominant	3	Hmga1,Hmga1b	AS160
Diabetic Cardiomyopathies	C0853897	TERF2IP	54386	Q9NYB0	TERF2 interacting protein		126	0.548	0.731	0.000026683	0.01		1	1	0	2017	2017	CDKN2A	Cyclin Dependent Kinase Inhibitor 2A	Protein Coding	51	GC09M021967	30.25	https://www.genecards.org/cgi-bin/carddisp.pl?gene=CDKN2A	6p21.1	6:43770208-43786486	VEGF, MVCD1	Vascular endothelial growth factor	192240	VEGFA	7422	ENSG00000112715,ENST00000372055.8		{Microvascular complications of diabetes 1}	603933		3	Vegfa	ASD3
Diabetic Cardiomyopathies	C0853897	GJA1	2697	P17302	gap junction protein alpha 1	Cell-cell junction	662	0.393	0.885	0.15523	0.01		1	1	0	2016	2016	CAPN3	Calpain 3	Protein Coding	47	GC15P042359	30.22	https://www.genecards.org/cgi-bin/carddisp.pl?gene=CAPN3	6q12-q16	6:62700000-105000000	CMD1K	Cardiomyopathy, dilated, 1K	605582		65014			Cardiomyopathy, dilated, 1K	605582		2		ASD5
Diabetic Cardiomyopathies	C0853897	FOXO3	2309	O43524	forkhead box O3		381	0.431	0.808	0.98806	0.01		1	1	0	2017	2017	CACNA1C	Calcium Voltage-Gated Channel Subunit Alpha1 C	Protein Coding	48	GC12P001970	30.22	https://www.genecards.org/cgi-bin/carddisp.pl?gene=CACNA1C	6q14.1	6:75749202-75919536	MYO6, DFNA22, DFNB37	Myosin VI	600970	MYO6	4646	ENSG00000196586,ENST00000369985.9		Deafness, autosomal dominant 22	606346	Autosomal dominant	3	Myo6	Asf1b
Diabetic Cardiomyopathies	C0853897	INPP5F	22876	Q9Y2H2	inositol polyphosphate-5-phosphatase F		9	0.805	0.231	2.3623E-07	0.01		1	1	0	2016	2016	NAGLU	N-Acetyl-Alpha-Glucosaminidase	Protein Coding	43	GC17P042535	30.07	https://www.genecards.org/cgi-bin/carddisp.pl?gene=NAGLU	6q14.1	6:75749202-75919536	MYO6, DFNA22, DFNB37	Myosin VI	600970	MYO6	4646	ENSG00000196586,ENST00000369985.9		Deafness, autosomal dominant 22, with hypertrophic cardiomyopathy	606346	Autosomal dominant	3	Myo6	ATF3
Diabetic Cardiomyopathies	C0853897	FGF1	2246	P05230	fibroblast growth factor 1	Signaling	184	0.507	0.846	0.44406	0.01		1	1	0	2013	2013	SGCD	Sarcoglycan Delta	Protein Coding	45	GC05P155686	30.05	https://www.genecards.org/cgi-bin/carddisp.pl?gene=SGCD	6q14.1	6:75749202-75919536	MYO6, DFNA22, DFNB37	Myosin VI	600970	MYO6	4646	ENSG00000196586,ENST00000369985.9		Deafness, autosomal recessive 37	607821	Autosomal recessive	3	Myo6	ATF6
Diabetic Cardiomyopathies	C0853897	EPO	2056	P01588	erythropoietin		646	0.381	0.885	0.01125	0.01		1	1	0	2017	2017	HJV	Hemojuvelin BMP Co-Receptor	Protein Coding	35	GC01M146018	29.91	https://www.genecards.org/cgi-bin/carddisp.pl?gene=HJV	6q21	6:105000000-114200000	IDDM15	Insulin-dependent diabetes mellitus-15	601666		3414			{Diabetes mellitus, insulin-dependent, 15}	601666		2		ATFB12
Diabetic Cardiomyopathies	C0853897	EPHB2	2048	P29323	EPH receptor B2	Kinase	649	0.374	0.846	0.99997	0.01		1	1	0	2018	2018	PPP1R3A	Protein Phosphatase 1 Regulatory Subunit 3A	Protein Coding	42	GC07M113876	29.9	https://www.genecards.org/cgi-bin/carddisp.pl?gene=PPP1R3A	6q21	6:112107930-112254721	LAMA4, LAMA3, CMD1JJ	Laminin, alpha-4	600133	LAMA4	3910	ENSG00000112769,ENST00000230538.12		Cardiomyopathy, dilated, 1JJ	615235	Autosomal dominant	3	Lama4	ATM
Diabetic Cardiomyopathies	C0853897	EGFR	1956	P00533	epidermal growth factor receptor	Kinase	1394	0.295	0.885	0.36837	0.01		1	1	0	2019	2019	IL1RN	Interleukin 1 Receptor Antagonist	Protein Coding	48	GC02P115307	29.86	https://www.genecards.org/cgi-bin/carddisp.pl?gene=IL1RN	6q22.31	6:118548295-118561715	PLN, PLB, CMD1P, CMH18	Phospholamban	172405	PLN	5350	ENSG00000198523,ENST00000357525.6		Cardiomyopathy, dilated, 1P	609909		3		ATP12A
Diabetic Cardiomyopathies	C0853897	EGF	1950	P01133	epidermal growth factor		774	0.357	0.923	8.5294E-17	0.01		1	1	0	2019	2019	EPO	Erythropoietin	Protein Coding	41	GC07P100720	29.77	https://www.genecards.org/cgi-bin/carddisp.pl?gene=EPO	6q22.31	6:118548295-118561715	PLN, PLB, CMD1P, CMH18	Phospholamban	172405	PLN	5350	ENSG00000198523,ENST00000357525.6		Cardiomyopathy, hypertrophic, 18	613874	Autosomal dominant	3		ATP13A2
Diabetic Cardiomyopathies	C0853897	DUSP5	1847	Q16690	dual specificity phosphatase 5		78	0.597	0.654	0.0033227	0.01		1	1	0	2017	2017	MEF2A	Myocyte Enhancer Factor 2A	Protein Coding	47	GC15P099565	29.63	https://www.genecards.org/cgi-bin/carddisp.pl?gene=MEF2A	6q23	6:130000000-138300000	CMD1F, CDCD3, LGMD1D	Cardiomyopathy, dilated-1F, autosomal dominant	602067					Cardiomyopathy, dilated, 1F and limb-girdle muscular dystrophy type 1D	602067		2		ATP2A1
Diabetic Cardiomyopathies	C0853897	TBC1D1	23216	Q86TI0	TBC1 domain family member 1	Enzyme	25	0.716	0.423	1.8584E-13	0.01		1	1	1	2020	2020	IL1B	Interleukin 1 Beta	Protein Coding	48	GC02M112829	29.51	https://www.genecards.org/cgi-bin/carddisp.pl?gene=IL1B	6q23.2	6:131808019-131895154	ENPP1, PDNP1, NPPS, M6S1, PCA1, ARHR2, COLED	Ectonucleotide pyrophosphatase/phosphodiesterase 1 (Ly-41 antigen, mouse, homolog of)	173335	ENPP1	5167	ENSG00000197594,ENST00000647893.1		{Diabetes mellitus, non-insulin-dependent, susceptibility to}	125853	Autosomal dominant	3	Enpp1	ATP2A2
Diabetic Cardiomyopathies	C0853897	NEDD4L	23327	Q96PU5	NEDD4 like E3 ubiquitin protein ligase	Enzyme	108	0.573	0.731	1	0.01		1	1	0	2020	2020	HADHA	Hydroxyacyl-CoA Dehydrogenase Trifunctional Multienzyme Complex Subunit Alpha	Protein Coding	45	GC02M026190	29.51	https://www.genecards.org/cgi-bin/carddisp.pl?gene=HADHA	6q23.2	6:131808019-131895154	ENPP1, PDNP1, NPPS, M6S1, PCA1, ARHR2, COLED	Ectonucleotide pyrophosphatase/phosphodiesterase 1 (Ly-41 antigen, mouse, homolog of)	173335	ENPP1	5167	ENSG00000197594,ENST00000647893.1		{Obesity, susceptibility to}	601665	Autosomal dominant; Autosomal recessive; Multifactorial	3	Enpp1	ATP2A3
Diabetic Cardiomyopathies	C0853897	FN1	2335	P02751	fibronectin 1	Signaling	724	0.365	0.962	0.0014045	0.01		1	1	0	2009	2009	ZMPSTE24	Zinc Metallopeptidase STE24	Protein Coding	43	GC01P040258	29.38	https://www.genecards.org/cgi-bin/carddisp.pl?gene=ZMPSTE24	6q23.2	6:131808019-131895154	ENPP1, PDNP1, NPPS, M6S1, PCA1, ARHR2, COLED	Ectonucleotide pyrophosphatase/phosphodiesterase 1 (Ly-41 antigen, mouse, homolog of)	173335	ENPP1	5167	ENSG00000197594,ENST00000647893.1		Arterial calcification, generalized, of infancy, 1	208000	Autosomal recessive	3	Enpp1	ATP2B3
Diabetic Cardiomyopathies	C0853897	TAS2R12P	266656		taste 2 receptor member 12 pseudogene		4	0.861	0.154		0.01		1	1	0	2018	2018	MT-CYB	Mitochondrially Encoded Cytochrome B	Protein Coding	31	GCMTP014749	29.35	https://www.genecards.org/cgi-bin/carddisp.pl?gene=MT-CYB	6q23.2	6:131808019-131895154	ENPP1, PDNP1, NPPS, M6S1, PCA1, ARHR2, COLED	Ectonucleotide pyrophosphatase/phosphodiesterase 1 (Ly-41 antigen, mouse, homolog of)	173335	ENPP1	5167	ENSG00000197594,ENST00000647893.1		Cole disease	615522	Autosomal dominant	3	Enpp1	ATP4A
Diabetic Cardiomyopathies	C0853897	POLDIP2	26073	Q9Y2S7	DNA polymerase delta interacting protein 2		530	0.396	0.923	0.41407	0.01		1	1	0	2019	2019	KLF11	Kruppel Like Factor 11	Protein Coding	39	GC02P010044	29.35	https://www.genecards.org/cgi-bin/carddisp.pl?gene=KLF11	6q23.2	6:131808019-131895154	ENPP1, PDNP1, NPPS, M6S1, PCA1, ARHR2, COLED	Ectonucleotide pyrophosphatase/phosphodiesterase 1 (Ly-41 antigen, mouse, homolog of)	173335	ENPP1	5167	ENSG00000197594,ENST00000647893.1		Hypophosphatemic rickets, autosomal recessive, 2	613312	Autosomal recessive	3	Enpp1	ATP5F1A
Diabetic Cardiomyopathies	C0853897	RNF19A	25897	Q9NV58	ring finger protein 19A, RBR E3 ubiquitin protein ligase	Enzyme	523	0.397	0.923	0.025305	0.01		1	1	0	2019	2019	ELN	Elastin	Protein Coding	44	GC07P074027	29.34	https://www.genecards.org/cgi-bin/carddisp.pl?gene=ELN	6q23.2	6:133240339-133532127	EYA4, DFNA10, CMD1J	EYA transcriptional coactivator and phosphatase 4	603550	EYA4	2070	ENSG00000112319,ENST00000452339.6	mutation identified in 1 CMD1J family	?Cardiomyopathy, dilated, 1J	605362	Autosomal dominant	3	Eya4	ATP5F1E
Diabetic Cardiomyopathies	C0853897	TINCR	257000		TINCR ubiquitin domain containing		32	0.7	0.462		0.01		1	1	0	2018	2018	EDN1	Endothelin 1	Protein Coding	47	GC06P012290	29.16	https://www.genecards.org/cgi-bin/carddisp.pl?gene=EDN1	6q23.2	6:133240339-133532127	EYA4, DFNA10, CMD1J	EYA transcriptional coactivator and phosphatase 4	603550	EYA4	2070	ENSG00000112319,ENST00000452339.6	mutation identified in 1 CMD1J family	Deafness, autosomal dominant 10	601316	Autosomal dominant	3	Eya4	ATP6AP2
Diabetic Cardiomyopathies	C0853897	DAPK2	23604	Q9UIK4	death associated protein kinase 2	Kinase	130	0.536	0.692	5.0088E-10	0.01		1	1	0	2017	2017	MC4R	Melanocortin 4 Receptor	Protein Coding	45	GC18M060371	29.13	https://www.genecards.org/cgi-bin/carddisp.pl?gene=MC4R	6q24	6:138300000-148500000	TNDM1	Transient neonatal diabetes mellitus 1	601410				disordered imprinting of PLAGL1 and HYMAI	{Diabetes mellitus, transient neonatal 1}	601410	Autosomal dominant	4		ATP7A
Diabetic Cardiomyopathies	C0853897	DDAH1	23576	O94760	dimethylarginine dimethylaminohydrolase 1	Enzyme	73	0.604	0.615	0.0027974	0.01		1	1	0	2019	2019	TMPO	Thymopoietin	Protein Coding	45	GC12P098515	29.07	https://www.genecards.org/cgi-bin/carddisp.pl?gene=TMPO	6q25	6:148500000-160600000	IDDM21	Diabetes mellitus, insulin-dependent, 21	612521				associated with rs1738074	{Diabetes mellitus, insulin-dependent, 21}	612521		2		ATP7B
Diabetic Cardiomyopathies	C0853897	DDAH2	23564	O95865	dimethylarginine dimethylaminohydrolase 2	Enzyme	36	0.67	0.538	0.013773	0.01		1	1	0	2019	2019	G6PC	Glucose-6-Phosphatase Catalytic Subunit	Protein Coding	44	GC17P042900	29.07	https://www.genecards.org/cgi-bin/carddisp.pl?gene=G6PC	6q25-q27	6:148500000-170805979	IDDM8	Insulin-dependent diabetes mellitus-8	600883		3407			{Diabetes mellitus, insulin-dependent, 8}	600883		2		ATXN1
Diabetic Cardiomyopathies	C0853897	RBFOX2	23543	O43251	RNA binding fox-1 homolog 2	Nucleic acid binding	80	0.59	0.846	0.99902	0.01		1	1	0	2016	2016	MT-CO3	Mitochondrially Encoded Cytochrome C Oxidase III	Protein Coding	30	GCMTP009209	28.93	https://www.genecards.org/cgi-bin/carddisp.pl?gene=MT-CO3	6q25.1	6:149400261-149401277	SUMO4, IDDM5	Small ubiquitin-like modifier 4	608829	SUMO4	387082	ENSG00000177688,ENST00000326669.6		{Diabetes mellitus, insulin-dependent, 5}	600320		3		ATXN10
Diabetic Cardiomyopathies	C0853897	DPP4	1803	P27487	dipeptidyl peptidase 4	Enzyme	451	0.42	0.808	7.2797E-09	0.01		1	1	0	2017	2017	SCO2	Synthesis Of Cytochrome C Oxidase 2	Protein Coding	45	GC22M050523	28.92	https://www.genecards.org/cgi-bin/carddisp.pl?gene=SCO2	6q25.3	6:159669068-159762280	SOD2, MNSOD, MVCD6	Superoxide dismutase-2, mitochondrial	147460	SOD2	6648	ENSG00000112096,ENST00000538183.7		{Microvascular complications of diabetes 6}	612634		3	Sod2	ATXN2
Diabetic Cardiomyopathies	C0853897	DCN	1634	P07585	decorin		297	0.457	0.808	0.31231	0.01		1	1	0	2017	2017	MYL3	Myosin Light Chain 3	Protein Coding	44	GC03M046836	28.89	https://www.genecards.org/cgi-bin/carddisp.pl?gene=MYL3	7p15.3	7:22725888-22732001	IL6, IFNB2, BSF2, HSF, HGF	Interleukin-6 (interferon, beta-2)	147620	IL6	3569	ENSG00000136244,ENST00000258743.10		{Crohn disease-associated growth failure}	266600	Multifactorial	3	Il6	ATXN3
Diabetic Cardiomyopathies	C0853897	RLN3	117579	Q8WXF3	relaxin 3		18	0.751	0.423	0.013378	0.01		1	1	0	2017	2017	DMPK	DM1 Protein Kinase	Protein Coding	48	GC19M045769	28.89	https://www.genecards.org/cgi-bin/carddisp.pl?gene=DMPK	7p15.3	7:22725888-22732001	IL6, IFNB2, BSF2, HSF, HGF	Interleukin-6 (interferon, beta-2)	147620	IL6	3569	ENSG00000136244,ENST00000258743.10		{Diabetes, susceptibility to},	222100	Autosomal recessive	3	Il6	ATXN8OS
Diabetic Cardiomyopathies	C0853897	TXNRD3	114112	Q86VQ6	thioredoxin reductase 3	Enzyme	37	0.653	0.615	8.3449E-08	0.01		1	1	0	2002	2002	GYS1	Glycogen Synthase 1	Protein Coding	49	GC19M048970	28.81	https://www.genecards.org/cgi-bin/carddisp.pl?gene=GYS1	7p15.3	7:22725888-22732001	IL6, IFNB2, BSF2, HSF, HGF	Interleukin-6 (interferon, beta-2)	147620	IL6	3569	ENSG00000136244,ENST00000258743.10		{Intracranial hemorrhage in brain cerebrovascular malformations, susceptibility to}	108010	Somatic mutation	3	Il6	AVP
Diabetic Cardiomyopathies	C0853897	FGL2	10875	Q14314	fibrinogen like 2	Signaling	63	0.621	0.615	0.000061472	0.01		1	1	0	2018	2018	AGTR1	Angiotensin II Receptor Type 1	Protein Coding	51	GC03P148697	28.67	https://www.genecards.org/cgi-bin/carddisp.pl?gene=AGTR1	7p15.3	7:22725888-22732001	IL6, IFNB2, BSF2, HSF, HGF	Interleukin-6 (interferon, beta-2)	147620	IL6	3569	ENSG00000136244,ENST00000258743.10		{Kaposi sarcoma, susceptibility to}	148000	Autosomal dominant	3	Il6	AVPR1B
Diabetic Cardiomyopathies	C0853897	OGA	10724	O60502	O-GlcNAcase		140	0.534	0.731	0.96569	0.01		1	1	0	2015	2015	POLG	DNA Polymerase Gamma, Catalytic Subunit	Protein Coding	45	GC15M089316	28.51	https://www.genecards.org/cgi-bin/carddisp.pl?gene=POLG	7p15.3	7:22725888-22732001	IL6, IFNB2, BSF2, HSF, HGF	Interleukin-6 (interferon, beta-2)	147620	IL6	3569	ENSG00000136244,ENST00000258743.10		{Rheumatoid arthritis, systemic juvenile}	604302		3	Il6	AVPR2
Diabetic Cardiomyopathies	C0853897	AHSA1	10598	O95433	activator of HSP90 ATPase activity 1		526	0.396	0.923	0.99896	0.01		1	1	0	2019	2019	WRN	WRN RecQ Like Helicase	Protein Coding	45	GC08P031033	28.42	https://www.genecards.org/cgi-bin/carddisp.pl?gene=WRN	7p13	7:44143212-44189438	GCK, HHF3, PNDM1	Glucokinase (hexokinase-4)	138079	GCK	2645	ENSG00000106633,ENST00000403799.8	proximal to TCRB	Diabetes mellitus, noninsulin-dependent, late onset	125853	Autosomal dominant	3	Gck	AVRP
Diabetic Cardiomyopathies	C0853897	SMC2	10592	O95347	structural maintenance of chromosomes 2		43	0.653	0.462	0.9999	0.01		1	1	0	2018	2018	IGF1R	Insulin Like Growth Factor 1 Receptor	Protein Coding	54	GC15P098648	28.39	https://www.genecards.org/cgi-bin/carddisp.pl?gene=IGF1R	7p13	7:44143212-44189438	GCK, HHF3, PNDM1	Glucokinase (hexokinase-4)	138079	GCK	2645	ENSG00000106633,ENST00000403799.8	proximal to TCRB	Diabetes mellitus, permanent neonatal 1	606176	Autosomal recessive	3	Gck	B2M
Diabetic Cardiomyopathies	C0853897	NKILA	105416157		NF-kappaB interacting lncRNA		25	0.711	0.423		0.01		1	1	0	2019	2019	STAT1	Signal Transducer And Activator Of Transcription 1	Protein Coding	53	GC02M190908	28.36	https://www.genecards.org/cgi-bin/carddisp.pl?gene=STAT1	7p13	7:44143212-44189438	GCK, HHF3, PNDM1	Glucokinase (hexokinase-4)	138079	GCK	2645	ENSG00000106633,ENST00000403799.8	proximal to TCRB	Hyperinsulinemic hypoglycemia, familial, 3	602485	Autosomal dominant	3	Gck	BAD
Diabetic Cardiomyopathies	C0853897	MICU1	10367	Q9BPX6	mitochondrial calcium uptake 1	Calcium-binding protein	76	0.638	0.654	1.9344E-13	0.01		1	1	0	2017	2017	HLA-DQA1	Major Histocompatibility Complex, Class II, DQ Alpha 1	Protein Coding	42	GC06P047340	28.2	https://www.genecards.org/cgi-bin/carddisp.pl?gene=HLA-DQA1	7p13	7:44143212-44189438	GCK, HHF3, PNDM1	Glucokinase (hexokinase-4)	138079	GCK	2645	ENSG00000106633,ENST00000403799.8	proximal to TCRB	MODY, type II	125851	Autosomal dominant	3	Gck	BAG3
Diabetic Cardiomyopathies	C0853897	ACVR1C	130399	Q8NER5	activin A receptor type 1C	Kinase	31	0.7	0.423	0.00085157	0.01		1	1	0	2020	2020	ABCC9	ATP Binding Cassette Subfamily C Member 9	Protein Coding	44	GC12M021797	28.19	https://www.genecards.org/cgi-bin/carddisp.pl?gene=ABCC9	7p12.1-q21	7:50500000-98400000	CMH21	Cardiomyopathy, familial hypertrophic, 21	614676		100909387		max lod at D7S669	Cardiomyopathy, hypertrophic, 21	614676	Autosomal dominant	2		BAIAP2L1
Diabetic Cardiomyopathies	C0853897	CRK	1398	P46108	CRK proto-oncogene, adaptor protein		544	0.394	0.923	0.95936	0.01		1	1	0	2019	2019	AVPR2	Arginine Vasopressin Receptor 2	Protein Coding	47	GC0XP153902	28.17	https://www.genecards.org/cgi-bin/carddisp.pl?gene=AVPR2	7q21.2	7:92447447-92494630	GATAD1, ODAG, CMD2B	GATA zinc finger domain-containing protein 1	614518	GATAD1	57798	ENSG00000157259,ENST00000287957.5	mutation identified in 1 GATAD1 family	?Cardiomyopathy, dilated, 2B	614672	Autosomal recessive	3	Gatad1	BAMBI
Diabetic Cardiomyopathies	C0853897	CRP	1401	P02741	C-reactive protein		1483	0.299	0.962	0.0036969	0.01		1	1	0	2011	2011	PTPN1	Protein Tyrosine Phosphatase Non-Receptor Type 1	Protein Coding	51	GC20P050510	28.16	https://www.genecards.org/cgi-bin/carddisp.pl?gene=PTPN1	7q21.3	7:95297675-95324531	PON1, PON, ESA, MVCD5	Paraoxonase-1	168820	PON1	5444	ENSG00000005421,ENST00000222381.8		{Coronary artery disease, susceptibility to}			3	Pon1	BAX
Diabetic Cardiomyopathies	C0853897	CYP2J2	1573	P51589	cytochrome P450 family 2 subfamily J member 2		65	0.628	0.615	1.6181E-15	0.01		1	1	0	2013	2013	ICAM1	Intercellular Adhesion Molecule 1	Protein Coding	50	GC19P010270	27.92	https://www.genecards.org/cgi-bin/carddisp.pl?gene=ICAM1	7q21.3	7:95297675-95324531	PON1, PON, ESA, MVCD5	Paraoxonase-1	168820	PON1	5444	ENSG00000005421,ENST00000222381.8		{Coronary artery spasm 2, susceptibility to			3	Pon1	BAZ1B
Diabetic Cardiomyopathies	C0853897	CYP2B6	1555	P20813	cytochrome P450 family 2 subfamily B member 6		388	0.428	0.846	1.9303E-10	0.01		1	1	0	2019	2019	SLC22A5	Solute Carrier Family 22 Member 5	Protein Coding	46	GC05P132369	27.84	https://www.genecards.org/cgi-bin/carddisp.pl?gene=SLC22A5	7q21.3	7:95297675-95324531	PON1, PON, ESA, MVCD5	Paraoxonase-1	168820	PON1	5444	ENSG00000005421,ENST00000222381.8		{Microvascular complications of diabetes 5}	612633		3	Pon1	BBS1
Diabetic Cardiomyopathies	C0853897	ADRB2	154	P07550	adrenoceptor beta 2	G-protein coupled receptor	387	0.442	0.923	0.52545	0.01		1	1	0	2019	2019	NPPB	Natriuretic Peptide B	Protein Coding	44	GC01M011858	27.77	https://www.genecards.org/cgi-bin/carddisp.pl?gene=NPPB	7q21.3	7:95297675-95324531	PON1, PON, ESA, MVCD5	Paraoxonase-1	168820	PON1	5444	ENSG00000005421,ENST00000222381.8		{Organophosphate poisoning, sensitivity to}			3	Pon1	BBS10
Diabetic Cardiomyopathies	C0853897	GPBAR1	151306	Q8TDU6	G protein-coupled bile acid receptor 1	G-protein coupled receptor	122	0.548	0.731	1.3633E-09	0.01		1	1	0	2019	2019	LIPC	Lipase C, Hepatic Type	Protein Coding	44	GC15P058410	27.68	https://www.genecards.org/cgi-bin/carddisp.pl?gene=LIPC	7q22.1	7:100720467-100723699	EPO, MVCD2, ECYT5, DBAL	Erythropoietin	133170	EPO	2056	ENSG00000130427,ENST00000252723.3	mutation identified in 1 DBAL family	?Diamond-Blackfan anemia-like	617911	Autosomal recessive	3	Epo	BBS12
Diabetic Cardiomyopathies	C0853897	CTH	1491	P32929	cystathionine gamma-lyase	Enzyme	93	0.578	0.615	7.482E-08	0.01		1	1	0	2018	2018	LIPE	Lipase E, Hormone Sensitive Type	Protein Coding	47	GC19M042401	27.68	https://www.genecards.org/cgi-bin/carddisp.pl?gene=LIPE	7q22.1	7:100720467-100723699	EPO, MVCD2, ECYT5, DBAL	Erythropoietin	133170	EPO	2056	ENSG00000130427,ENST00000252723.3	mutation identified in 1 DBAL family	{Microvascular complications of diabetes 2}	612623		3	Epo	BBS2
Diabetic Cardiomyopathies	C0853897	CSF3	1440	P09919	colony stimulating factor 3		687	0.377	0.885	0.38046	0.01		1	1	0	2020	2020	REN	Renin	Protein Coding	48	GC01M204154	27.66	https://www.genecards.org/cgi-bin/carddisp.pl?gene=REN	7q22.1	7:100720467-100723699	EPO, MVCD2, ECYT5, DBAL	Erythropoietin	133170	EPO	2056	ENSG00000130427,ENST00000252723.3	mutation identified in 1 DBAL family	Erythrocytosis, familial, 5	617907	Autosomal dominant	3	Epo	BBS4
Diabetic Cardiomyopathies	C0853897	MAPK14	1432	Q16539	mitogen-activated protein kinase 14	Kinase	626	0.379	0.923	0.37466	0.01		1	1	0	2019	2019	CCR5	C-C Motif Chemokine Receptor 5	Protein Coding	46	GC03P046383	27.65	https://www.genecards.org/cgi-bin/carddisp.pl?gene=CCR5	7q22.3-q31.1	7:104900000-115000000	CMD1Q	Cardiomyopathy, dilated, 1Q	609915		664728		between D7S2545 and D7S2554	Cardiomyopathy, dilated, 1Q	609915		2		BBS5
Diabetic Cardiomyopathies	C0853897	PARP1	142	P09874	poly(ADP-ribose) polymerase 1		565	0.389	0.923	0.00033366	0.01		1	1	0	2017	2017	PLN	Phospholamban	Protein Coding	44	GC06P118548	27.61	https://www.genecards.org/cgi-bin/carddisp.pl?gene=PLN	7q32.1	7:127610291-127618141	PAX4, MODY9, KPD	Paired box homeotic gene-4	167413	PAX4	5078	ENSG00000106331,ENST00000639438.3		{Diabetes mellitus, ketosis-prone, susceptibility to}	612227	Autosomal dominant; Autosomal recessive	3	Pax4	BBS7
Diabetic Cardiomyopathies	C0853897	MIR675	100033819		microRNA 675		69	0.595	0.654		0.01		1	1	0	2016	2016	APOB	Apolipoprotein B	Protein Coding	45	GC02M020956	27.53	https://www.genecards.org/cgi-bin/carddisp.pl?gene=APOB	7q32.1	7:127610291-127618141	PAX4, MODY9, KPD	Paired box homeotic gene-4	167413	PAX4	5078	ENSG00000106331,ENST00000639438.3		Diabetes mellitus, type 2	125853	Autosomal dominant	3	Pax4	Bcat2
Diabetic Cardiomyopathies	C0853897	PHB	5245	P35232	prohibitin		177	0.511	0.846	0.7588	0.01		1	1	0	2016	2016	FKRP	Fukutin Related Protein	Protein Coding	40	GC19P046746	27.49	https://www.genecards.org/cgi-bin/carddisp.pl?gene=FKRP	7q32.1	7:127610291-127618141	PAX4, MODY9, KPD	Paired box homeotic gene-4	167413	PAX4	5078	ENSG00000106331,ENST00000639438.3		Maturity-onset diabetes of the young, type IX	612225		3	Pax4	BCHE
Diabetic Cardiomyopathies	C0853897	MAOA	4128	P21397	monoamine oxidase A		300	0.465	0.769	0.99928	0.01		1	1	0	2015	2015	F2	Coagulation Factor II, Thrombin	Protein Coding	48	GC11P046720	27.27	https://www.genecards.org/cgi-bin/carddisp.pl?gene=F2	7q32.1	7:128830405-128859271	FLNC, FLN2, ABPA, ABPL, MFM5, MPD4, CMH26, RCM5	Filamin C (actin-binding protein-280)	102565	FLNC	2318	ENSG00000128591,ENST00000346177.6		Cardiomyopathy, familial hypertrophic, 26	617047	Autosomal dominant	3	Flnc	BCL2
Diabetic Cardiomyopathies	C0853897	STS	412	P08842	steroid sulfatase	Enzyme	382	0.431	0.846	0.80886	0.01		1	1	0	2017	2017	SLC30A10	Solute Carrier Family 30 Member 10	Protein Coding	42	GC01M219685	27.26	https://www.genecards.org/cgi-bin/carddisp.pl?gene=SLC30A10	7q32.1	7:128830405-128859271	FLNC, FLN2, ABPA, ABPL, MFM5, MPD4, CMH26, RCM5	Filamin C (actin-binding protein-280)	102565	FLNC	2318	ENSG00000128591,ENST00000346177.6		Cardiomyopathy, familial restrictive 5	617047	Autosomal dominant	3	Flnc	BCL2L1
Diabetic Cardiomyopathies	C0853897	SMAD7	4092	O15105	SMAD family member 7	Transcription factor	269	0.47	0.769	0.54854	0.01		1	1	0	2018	2018	PPARA	Peroxisome Proliferator Activated Receptor Alpha	Protein Coding	45	GC22P046150	27.04	https://www.genecards.org/cgi-bin/carddisp.pl?gene=PPARA	7q32.1	7:128830405-128859271	FLNC, FLN2, ABPA, ABPL, MFM5, MPD4, CMH26, RCM5	Filamin C (actin-binding protein-280)	102565	FLNC	2318	ENSG00000128591,ENST00000346177.6		Myopathy, distal, 4	614065	Autosomal dominant	3	Flnc	BCL6
Diabetic Cardiomyopathies	C0853897	SMAD2	4087	Q15796	SMAD family member 2	Transcription factor	289	0.456	0.808	0.99661	0.01		1	1	0	2018	2018	MEN1	Menin 1	Protein Coding	46	GC11M064803	27.03	https://www.genecards.org/cgi-bin/carddisp.pl?gene=MEN1	7q32.1	7:128830405-128859271	FLNC, FLN2, ABPA, ABPL, MFM5, MPD4, CMH26, RCM5	Filamin C (actin-binding protein-280)	102565	FLNC	2318	ENSG00000128591,ENST00000346177.6		Myopathy, myofibrillar, 5	609524	Autosomal dominant	3	Flnc	BCS1L
Diabetic Cardiomyopathies	C0853897	MIR92A2	407049		microRNA 92a-2		9	0.805	0.269		0.01		1	1	0	2019	2019	IL10	Interleukin 10	Protein Coding	47	GC01M206767	26.95	https://www.genecards.org/cgi-bin/carddisp.pl?gene=IL10	7q36.1	7:151556123-151877114	PRKAG2, WPWS, CMH6	Protein kinase, AMP-activated, noncatalytic, gamma-2	602743	PRKAG2	51422	ENSG00000106617,ENST00000392801.6		Cardiomyopathy, hypertrophic 6	600858	Autosomal dominant	3	Prkag2	Bdh1
Diabetic Cardiomyopathies	C0853897	MIR221	407006		microRNA 221		304	0.449	0.846		0.01		1	1	0	2017	2017	PLAGL1	PLAG1 Like Zinc Finger 1	Protein Coding	43	GC06M143940	26.92	https://www.genecards.org/cgi-bin/carddisp.pl?gene=PLAGL1	7q36.1	7:151556123-151877114	PRKAG2, WPWS, CMH6	Protein kinase, AMP-activated, noncatalytic, gamma-2	602743	PRKAG2	51422	ENSG00000106617,ENST00000392801.6		Glycogen storage disease of heart, lethal congenital	261740	Autosomal dominant	3	Prkag2	BDKRB2
Diabetic Cardiomyopathies	C0853897	MIR21	406991		microRNA 21		726	0.363	0.846		0.01		1	1	0	2018	2018	MT-ND6	Mitochondrially Encoded NADH:Ubiquinone Oxidoreductase Core Subunit 6	Protein Coding	32	GCMTM014151	26.84	https://www.genecards.org/cgi-bin/carddisp.pl?gene=MT-ND6	7q36.1	7:151556123-151877114	PRKAG2, WPWS, CMH6	Protein kinase, AMP-activated, noncatalytic, gamma-2	602743	PRKAG2	51422	ENSG00000106617,ENST00000392801.6		Wolff-Parkinson-White syndrome	194200	Autosomal dominant	3	Prkag2	BDNF
Diabetic Cardiomyopathies	C0853897	MIR200B	406984		microRNA 200b		180	0.5	0.769		0.01		1	1	0	2019	2019	NKX2-5	NK2 Homeobox 5	Protein Coding	44	GC05M173232	26.8	https://www.genecards.org/cgi-bin/carddisp.pl?gene=NKX2-5	8p23.1	8:11493990-11564598	BLK, MODY11	BLK protooncogene, SRC family tyrosinase kinase	191305	BLK	640	ENSG00000136573,ENST00000529894.1		Maturity-onset diabetes of the young, type 11	613375	Autosomal dominant	3	Blk	BECN1
Diabetic Cardiomyopathies	C0853897	MECP2	4204	P51608	methyl-CpG binding protein 2	Epigenetic regulator	664	0.414	0.846	0.89382	0.01		1	1	0	2019	2019	PIK3CA	Phosphatidylinositol-4,5-Bisphosphate 3-Kinase Catalytic Subunit Alpha	Protein Coding	52	GC03P179148	26.65	https://www.genecards.org/cgi-bin/carddisp.pl?gene=PIK3CA	8q24.11	8:116950216-117176713	SLC30A8, ZNT8	Solute carrier family 30 (zinc transporter), member 8	611145	SLC30A8	169026	ENSG00000164756,ENST00000521243.5		{Diabetes mellitus, noninsulin-dependent, susceptibility to}	125853	Autosomal dominant	3	Slc30a8	BEST1
Diabetic Cardiomyopathies	C0853897	MFAP1	4236	P55081	microfibril associated protein 1	Extracellular structure	357	0.431	0.846	0.79602	0.01		1	1	0	2019	2019	SERPINE1	Serpin Family E Member 1	Protein Coding	50	GC07P101127	26.56	https://www.genecards.org/cgi-bin/carddisp.pl?gene=SERPINE1	8q24.3	8:143428063-143430731	MAFA, RIPE3B1, INSDM	MAF bZIP transcription factor A	610303	MAFA	389692	ENSG00000182759,ENST00000333480.3		Insulinomatosis and diabetes mellitus	147630	Autosomal dominant	3	Mafa	BGLAP
Diabetic Cardiomyopathies	C0853897	MMP9	4318	P14780	matrix metallopeptidase 9	Enzyme	1337	0.305	0.923	1.8869E-17	0.01		1	1	0	2014	2014	FLT1	Fms Related Receptor Tyrosine Kinase 1	Protein Coding	51	GC13M028300	26.55	https://www.genecards.org/cgi-bin/carddisp.pl?gene=FLT1	9p24.2	9:3824126-4310693	GLIS3, ZNF515, NDH	GLIS family zinc finger protein 3	610192	GLIS3	169792	ENSG00000107249,ENST00000381971.8		Diabetes mellitus, neonatal, with congenital hypothyroidism	610199	Autosomal recessive	3	Glis3	BIN1
Diabetic Cardiomyopathies	C0853897	SIRT6	51548	Q8N6T7	sirtuin 6	Epigenetic regulator	195	0.496	0.846	0.039119	0.01		1	1	0	2019	2019	VCAM1	Vascular Cell Adhesion Molecule 1	Protein Coding	45	GC01P100719	26.52	https://www.genecards.org/cgi-bin/carddisp.pl?gene=VCAM1	9q13	9:61500000-65000000	CMD1B, CMPD1, FDC	Cardiomyopathy, dilated-1B, autosomal dominant	600884		1218			Cardiomyopathy, dilated 1B	600884	Autosomal dominant	2		BIR
Diabetic Cardiomyopathies	C0853897	SERPINE1	5054	P05121	serpin family E member 1	Enzyme modulator	770	0.359	0.885	0.043609	0.01		1	1	0	2018	2018	SDHB	Succinate Dehydrogenase Complex Iron Sulfur Subunit B	Protein Coding	47	GC01M017020	26.51	https://www.genecards.org/cgi-bin/carddisp.pl?gene=SDHB	9q31.2	9:105558116-105655949	FKTN, FCMD, CMD1X, LGMDR13, MDDGA4, MDDGB4, MDDGC4	Fukutin	607440	FKTN	2218	ENSG00000106692,ENST00000357998.10		Cardiomyopathy, dilated, 1X	611615	Autosomal recessive	3	Fktn	BLK
Diabetic Cardiomyopathies	C0853897	PAEP	5047	P09466	progestagen associated endometrial protein	Enzyme	397	0.43	0.846	3.1109E-08	0.01		1	1	0	2018	2018	LAMA4	Laminin Subunit Alpha 4	Protein Coding	44	GC06M112107	26.47	https://www.genecards.org/cgi-bin/carddisp.pl?gene=LAMA4	9q31.2	9:105558116-105655949	FKTN, FCMD, CMD1X, LGMDR13, MDDGA4, MDDGB4, MDDGC4	Fukutin	607440	FKTN	2218	ENSG00000106692,ENST00000357998.10		Muscular dystrophy-dystroglycanopathy (congenital with brain and eye anomalies), type A, 4	253800	Autosomal recessive	3	Fktn	BLM
Diabetic Cardiomyopathies	C0853897	OPA1	4976	O60313	OPA1 mitochondrial dynamin like GTPase	Enzyme modulator	236	0.51	0.846	0.98636	0.01		1	1	0	2019	2019	GAA	Glucosidase Alpha, Acid	Protein Coding	47	GC17P080101	26.45	https://www.genecards.org/cgi-bin/carddisp.pl?gene=GAA	9q31.2	9:105558116-105655949	FKTN, FCMD, CMD1X, LGMDR13, MDDGA4, MDDGB4, MDDGC4	Fukutin	607440	FKTN	2218	ENSG00000106692,ENST00000357998.10		Muscular dystrophy-dystroglycanopathy (congenital without mental retardation), type B, 4	613152	Autosomal recessive	3	Fktn	BLOC1S1
Diabetic Cardiomyopathies	C0853897	NGF	4803	P01138	nerve growth factor	Signaling	616	0.391	0.885	0.82026	0.01		1	1	0	2012	2012	PYGM	Glycogen Phosphorylase, Muscle Associated	Protein Coding	46	GC11M064746	26.37	https://www.genecards.org/cgi-bin/carddisp.pl?gene=PYGM	9q31.2	9:105558116-105655949	FKTN, FCMD, CMD1X, LGMDR13, MDDGA4, MDDGB4, MDDGC4	Fukutin	607440	FKTN	2218	ENSG00000106692,ENST00000357998.10		Muscular dystrophy-dystroglycanopathy (limb-girdle), type C, 4	611588	Autosomal recessive	3	Fktn	BMD
Diabetic Cardiomyopathies	C0853897	ATF3	467	P18847	activating transcription factor 3	Transcription factor	228	0.494	0.885	0.089296	0.01		1	1	0	2017	2017	PLA2G6	Phospholipase A2 Group VI	Protein Coding	47	GC22M046185	26.34	https://www.genecards.org/cgi-bin/carddisp.pl?gene=PLA2G6	9q34.13	9:133061980-133071860	CEL, BSSL, CELL, MODY8	Carboxyl-ester lipase (bile-salt stimulated lipase)	114840	CEL	1056	ENSG00000170835,ENST00000372080.7		Maturity-onset diabetes of the young, type VIII	609812	Autosomal dominant	3	Cel	BMP2
Diabetic Cardiomyopathies	C0853897	MYH6	4624	P13533	myosin heavy chain 6		104	0.581	0.615	1.5952E-32	0.01		1	1	0	2013	2013	MIR499A	MicroRNA 499a	RNA Gene	21	GC20P034990	26.28	https://www.genecards.org/cgi-bin/carddisp.pl?gene=MIR499A	10p15.1	10:6010688-6062366	IL2RA, CD25, IL2R, IDDM10, IMD41	Interleukin-2 receptor, alpha	147730	IL2RA	3559	ENSG00000134460,ENST00000379959.8		{Diabetes, mellitus, insulin-dependent, susceptibility to, 10}	601942		3	Il2ra	BMP6
Diabetic Cardiomyopathies	C0853897	MIAT	440823		myocardial infarction associated transcript		84	0.573	0.692		0.01		1	1	0	2017	2017	DNAJC3	DnaJ Heat Shock Protein Family (Hsp40) Member C3	Protein Coding	40	GC13P095677	26.25	https://www.genecards.org/cgi-bin/carddisp.pl?gene=DNAJC3	10p15.1	10:6010688-6062366	IL2RA, CD25, IL2R, IDDM10, IMD41	Interleukin-2 receptor, alpha	147730	IL2RA	3559	ENSG00000134460,ENST00000379959.8		Immunodeficiency 41 with lymphoproliferation and autoimmunity	606367	Autosomal recessive	3	Il2ra	BMPER
Diabetic Cardiomyopathies	C0853897	MIR19B1	406980		microRNA 19b-1		144	0.529	0.769		0.01		1	1	0	2017	2017	TXNRD2	Thioredoxin Reductase 2	Protein Coding	46	GC22M019863	26.16	https://www.genecards.org/cgi-bin/carddisp.pl?gene=TXNRD2	10q21.3	10:68087906-68212016	MYPN, CMD1DD, CMH22, RCM4, NEM11	Myopalladin	608517	MYPN	84665	ENSG00000138347,ENST00000540630.5		Cardiomyopathy, dilated, 1KK	615248	Autosomal dominant	3	Mypn	BRAF
Diabetic Cardiomyopathies	C0853897	MIR195	406971		microRNA 195		180	0.496	0.769		0.01		1	1	0	2018	2018	SOS1	SOS Ras/Rac Guanine Nucleotide Exchange Factor 1	Protein Coding	47	GC02M038981	26.13	https://www.genecards.org/cgi-bin/carddisp.pl?gene=SOS1	10q21.3	10:68087906-68212016	MYPN, CMD1DD, CMH22, RCM4, NEM11	Myopalladin	608517	MYPN	84665	ENSG00000138347,ENST00000540630.5		Cardiomyopathy, familial restrictive, 4	615248	Autosomal dominant	3	Mypn	BRCA1
Diabetic Cardiomyopathies	C0853897	IGF1R	3480	P08069	insulin like growth factor 1 receptor	Kinase	556	0.399	0.885	0.96799	0.01		1	1	0	2017	2017	KRAS	KRAS Proto-Oncogene, GTPase	Protein Coding	51	GC12M025204	26.05	https://www.genecards.org/cgi-bin/carddisp.pl?gene=KRAS	10q21.3	10:68087906-68212016	MYPN, CMD1DD, CMH22, RCM4, NEM11	Myopalladin	608517	MYPN	84665	ENSG00000138347,ENST00000540630.5		Cardiomyopathy, hypertrophic, 22	615248	Autosomal dominant	3	Mypn	BRCA2
Diabetic Cardiomyopathies	C0853897	HSD11B1	3290	P28845	hydroxysteroid 11-beta dehydrogenase 1		163	0.52	0.731	0.41696	0.01		1	1	0	2017	2017	SYNE2	Spectrin Repeat Containing Nuclear Envelope Protein 2	Protein Coding	39	GC14P063761	26.02	https://www.genecards.org/cgi-bin/carddisp.pl?gene=SYNE2	10q21.3	10:68087906-68212016	MYPN, CMD1DD, CMH22, RCM4, NEM11	Myopalladin	608517	MYPN	84665	ENSG00000138347,ENST00000540630.5		Nemaline myopathy 11, autosomal recessive	617336	Autosomal recessive	3	Mypn	BSCL2
Diabetic Cardiomyopathies	C0853897	GSN	2934	P06396	gelsolin	Cellular structure	262	0.475	0.885	3.8905E-11	0.01		1	1	0	2018	2018	SOD1	Superoxide Dismutase 1	Protein Coding	51	GC21P031659	25.99	https://www.genecards.org/cgi-bin/carddisp.pl?gene=SOD1	10q22.2	10:73998115-74121362	VCL, CMD1W, CMH15	Vinculin	193065	VCL	7414	ENSG00000035403,ENST00000372755.7		Cardiomyopathy, dilated, 1W	611407		3	Vcl	BSF2
Diabetic Cardiomyopathies	C0853897	PYCARD	29108	Q9ULZ3	PYD and CARD domain containing	Enzyme	294	0.457	0.808	0.00019768	0.01		1	1	0	2017	2017	TCAP	Titin-Cap	Protein Coding	42	GC17P039664	25.94	https://www.genecards.org/cgi-bin/carddisp.pl?gene=TCAP	10q22.2	10:73998115-74121362	VCL, CMD1W, CMH15	Vinculin	193065	VCL	7414	ENSG00000035403,ENST00000372755.7		Cardiomyopathy, hypertrophic, 15	613255	Autosomal dominant	3	Vcl	BSG
Diabetic Cardiomyopathies	C0853897	NEAT1	283131		nuclear paraspeckle assembly transcript 1		179	0.502	0.769		0.01		1	1	0	2019	2019	IAPP	Islet Amyloid Polypeptide	Protein Coding	40	GC12P021354	25.94	https://www.genecards.org/cgi-bin/carddisp.pl?gene=IAPP	10q23.2	10:86666787-86736071	LDB3, ZASP, CYPHER, KIAA01613, MFM4, CMD1C, CMH24, LVNC3	LIM domain binding 3	605906	LDB3	11155	ENSG00000122367,ENST00000429277.7		Cardiomyopathy, dilated, 1C, with or without LVNC	601493	Autosomal dominant	3	Ldb3	BSSL
Diabetic Cardiomyopathies	C0853897	TOR2A	27433	Q5JU69;Q8N2E6	torsin family 2 member A	Chaperone	29	0.691	0.308	0.13617	0.01		1	1	0	2017	2017	GATA4	GATA Binding Protein 4	Protein Coding	48	GC08P011676	25.89	https://www.genecards.org/cgi-bin/carddisp.pl?gene=GATA4	10q23.2	10:86666787-86736071	LDB3, ZASP, CYPHER, KIAA01613, MFM4, CMD1C, CMH24, LVNC3	LIM domain binding 3	605906	LDB3	11155	ENSG00000122367,ENST00000429277.7		Cardiomyopathy, hypertrophic, 24	601493	Autosomal dominant	3	Ldb3	BUD23
Diabetic Cardiomyopathies	C0853897	MAT2B	27430	Q9NZL9	methionine adenosyltransferase 2B		48	0.644	0.5	0.046226	0.01		1	1	0	2002	2002	CXCL8	C-X-C Motif Chemokine Ligand 8	Protein Coding	41	GC04P073740	25.67	https://www.genecards.org/cgi-bin/carddisp.pl?gene=CXCL8	10q23.2	10:86666787-86736071	LDB3, ZASP, CYPHER, KIAA01613, MFM4, CMD1C, CMH24, LVNC3	LIM domain binding 3	605906	LDB3	11155	ENSG00000122367,ENST00000429277.7		Left ventricular noncompaction 3	601493	Autosomal dominant	3	Ldb3	C12orf65
Diabetic Cardiomyopathies	C0853897	GLP1R	2740	P43220	glucagon like peptide 1 receptor	G-protein coupled receptor	288	0.471	0.846	0.29347	0.01		1	1	0	2019	2019	UMOD	Uromodulin	Protein Coding	41	GC16M020344	25.65	https://www.genecards.org/cgi-bin/carddisp.pl?gene=UMOD	10q23.2	10:86666787-86736071	LDB3, ZASP, CYPHER, KIAA01613, MFM4, CMD1C, CMH24, LVNC3	LIM domain binding 3	605906	LDB3	11155	ENSG00000122367,ENST00000429277.7		Myopathy, myofibrillar, 4	609452	Autosomal dominant	3	Ldb3	C2cd4b
Diabetic Cardiomyopathies	C0853897	IGF2	3481	P01344	insulin like growth factor 2		604	0.39	0.885	0.044127	0.01		1	1	0	2017	2017	PSEN2	Presenilin 2	Protein Coding	49	GC01P226870	25.49	https://www.genecards.org/cgi-bin/carddisp.pl?gene=PSEN2	10q23.31	10:87700000-91100000	IDDM24	Diabetes mellitus, insulin-dependent, 24	613006		100303715		associated with rs10509540	{Diabetes mellitus, insulin-dependent, 24}	613006		2		C3
Diabetic Cardiomyopathies	C0853897	IL1B	3553	P01584	interleukin 1 beta		1801	0.276	0.962	0.13005	0.01		1	1	0	2019	2019	TLR4	Toll Like Receptor 4	Protein Coding	51	GC09P117704	25.34	https://www.genecards.org/cgi-bin/carddisp.pl?gene=TLR4	10q23.3	10:87700000-95300000	RCM2	Cardiomyopathy, familial restrictive, 2	609578		619468		max lod at D10S1242	Cardiomyopathy, familial restrictive, 2	609578		2		C4A
Diabetic Cardiomyopathies	C0853897	CXCL8	3576	P10145	C-X-C motif chemokine ligand 8	Signaling	1254	0.31	0.962	0.00027377	0.01		1	1	0	2019	2019	KCNH2	Potassium Voltage-Gated Channel Subfamily H Member 2	Protein Coding	49	GC07M150944	25.32	https://www.genecards.org/cgi-bin/carddisp.pl?gene=KCNH2	10q25	10:104000000-117300000	IDDM17	Insulin-dependent diabetes mellitus-17	603266		8691			{Diabetes mellitus, insulin-dependent, 17}	603266		2		CA4
Diabetic Cardiomyopathies	C0853897	MIR193A	406968		microRNA 193a		116	0.541	0.731		0.01		1	1	0	2017	2017	MTTP	Microsomal Triglyceride Transfer Protein	Protein Coding	44	GC04P099563	25.26	https://www.genecards.org/cgi-bin/carddisp.pl?gene=MTTP	10q25.2	10:110641932-110839470	RBM20	RNA-binding motif protein 20	613171	RBM20	282996	ENSG00000203867,ENST00000369519.4		Cardiomyopathy, dilated, 1DD	613172	Autosomal dominant	3	Rbm20	CACNA1A
Diabetic Cardiomyopathies	C0853897	MIR18A	406953		microRNA 18a		154	0.52	0.846		0.01		1	1	0	2017	2017	BBS2	Bardet-Biedl Syndrome 2	Protein Coding	41	GC16M056467	25.06	https://www.genecards.org/cgi-bin/carddisp.pl?gene=BBS2	10q25.2-q25.3	10:112950246-113167677	TCF7L2, TCF4	Transcription factor 7-like 2	602228	TCF7L2	6934	ENSG00000148737,ENST00000627217.3		{Diabetes mellitus, type 2, susceptibility to}	125853	Autosomal dominant	3	Tcf7l2	CACNA1C
Diabetic Cardiomyopathies	C0853897	LGALS3	3958	P17931	galectin 3	Signaling	557	0.392	0.846	0.000023207	0.01		1	1	0	2017	2017	SYNE1	Spectrin Repeat Containing Nuclear Envelope Protein 1	Protein Coding	41	GC06M152121	25.03	https://www.genecards.org/cgi-bin/carddisp.pl?gene=SYNE1	10q26.11	10:119651379-119677818	BAG3, MFM6	BCL2-associated athanogene 3	603883	BAG3	9531	ENSG00000151929,ENST00000369085.7		Cardiomyopathy, dilated, 1HH	613881	Autosomal dominant	3	Bag3	CACNA1D
Diabetic Cardiomyopathies	C0853897	LEP	3952	P41159	leptin		931	0.349	0.846	0.46491	0.01		1	1	0	2009	2009	CAVIN1	Caveolae Associated Protein 1	Protein Coding	32	GC17M042404	25.03	https://www.genecards.org/cgi-bin/carddisp.pl?gene=CAVIN1	10q26.11	10:119651379-119677818	BAG3, MFM6	BCL2-associated athanogene 3	603883	BAG3	9531	ENSG00000151929,ENST00000369085.7		Myopathy, myofibrillar, 6	612954	Autosomal dominant	3	Bag3	CACNA1H
Diabetic Cardiomyopathies	C0853897	KNG1	3827	P01042	kininogen 1	Enzyme modulator	279	0.481	0.885	3.2071E-10	0.01		1	1	0	2004	2004	SLC40A1	Solute Carrier Family 40 Member 1	Protein Coding	46	GC02M189560	24.96	https://www.genecards.org/cgi-bin/carddisp.pl?gene=SLC40A1	11p15.5	11:2159778-2161208	INS, MODY10, IDDM2, PNDM4	Insulin	176730	INS	3630	ENSG00000254647,ENST00000381330.4	5'--INS-12.6kb-IGF2--3'; cen-HBBC-10cM-INS-2cM-HRAS1-3cM-TH	Diabetes mellitus, insulin-dependent, 2	125852	Autosomal dominant	3	Ins2	CACNA1S
Diabetic Cardiomyopathies	C0853897	ENHO	375704	Q6UWT2	energy homeostasis associated		71	0.599	0.769	0.10526	0.01		1	1	0	2019	2019	NDUFB11	NADH:Ubiquinone Oxidoreductase Subunit B11	Protein Coding	39	GC0XM047142	24.94	https://www.genecards.org/cgi-bin/carddisp.pl?gene=NDUFB11	11p15.5	11:2159778-2161208	INS, MODY10, IDDM2, PNDM4	Insulin	176730	INS	3630	ENSG00000254647,ENST00000381330.4	5'--INS-12.6kb-IGF2--3'; cen-HBBC-10cM-INS-2cM-HRAS1-3cM-TH	Diabetes mellitus, permanent neonatal 4	618858	Autosomal dominant; Autosomal recessive	3	Ins2	CACNA2D1
Diabetic Cardiomyopathies	C0853897	CXCL10	3627	P02778	C-X-C motif chemokine ligand 10	Signaling	631	0.378	0.885	0.36865	0.01		1	1	0	2016	2016	HLA-DPB1	Major Histocompatibility Complex, Class II, DP Beta 1	Protein Coding	43	GC06P047346	24.92	https://www.genecards.org/cgi-bin/carddisp.pl?gene=HLA-DPB1	11p15.5	11:2159778-2161208	INS, MODY10, IDDM2, PNDM4	Insulin	176730	INS	3630	ENSG00000254647,ENST00000381330.4	5'--INS-12.6kb-IGF2--3'; cen-HBBC-10cM-INS-2cM-HRAS1-3cM-TH	Hyperproinsulinemia	616214	Autosomal dominant	3	Ins2	CACNB2
Diabetic Cardiomyopathies	C0853897	IL17A	3605	Q16552	interleukin 17A		1074	0.324	0.923	0.043049	0.01		1	1	0	2018	2018	SLC30A8	Solute Carrier Family 30 Member 8	Protein Coding	42	GC08P116950	24.88	https://www.genecards.org/cgi-bin/carddisp.pl?gene=SLC30A8	11p15.5	11:2159778-2161208	INS, MODY10, IDDM2, PNDM4	Insulin	176730	INS	3630	ENSG00000254647,ENST00000381330.4	5'--INS-12.6kb-IGF2--3'; cen-HBBC-10cM-INS-2cM-HRAS1-3cM-TH	Maturity-onset diabetes of the young, type 10	613370	Autosomal dominant	3	Ins2	CALCA
Diabetic Cardiomyopathies	C0853897	RABGEF1	27342	Q9UJ41	RAB guanine nucleotide exchange factor 1	Enzyme modulator	122	0.55	0.731	0.00063083	0.01		1	1	0	2017	2017	MMP9	Matrix Metallopeptidase 9	Protein Coding	52	GC20P046008	24.64	https://www.genecards.org/cgi-bin/carddisp.pl?gene=MMP9	11p15.1	11:17385245-17389345	KCNJ11, BIR, PHHI, HHF2, TNDM3, MODY13, PNDM2	Potassium inwardly-rectifying channel, subfamily J, member 11	600937	KCNJ11	3767	ENSG00000187486,ENST00000339994.4	4.5kb 3' of SUR	{Diabetes mellitus, type 2, susceptibility to}	125853	Autosomal dominant	3	Kcnj11	CALR
																		MT-ND5	Mitochondrially Encoded NADH:Ubiquinone Oxidoreductase Core Subunit 5	Protein Coding	31	GCMTP012339	24.53	https://www.genecards.org/cgi-bin/carddisp.pl?gene=MT-ND5	11p15.1	11:17385245-17389345	KCNJ11, BIR, PHHI, HHF2, TNDM3, MODY13, PNDM2	Potassium inwardly-rectifying channel, subfamily J, member 11	600937	KCNJ11	3767	ENSG00000187486,ENST00000339994.4	4.5kb 3' of SUR	Diabetes mellitus, transient neonatal 3	610582	Autosomal dominant	3	Kcnj11	CALR3
																		ATM	ATM Serine/Threonine Kinase	Protein Coding	54	GC11P108222	24.36	https://www.genecards.org/cgi-bin/carddisp.pl?gene=ATM	11p15.1	11:17385245-17389345	KCNJ11, BIR, PHHI, HHF2, TNDM3, MODY13, PNDM2	Potassium inwardly-rectifying channel, subfamily J, member 11	600937	KCNJ11	3767	ENSG00000187486,ENST00000339994.4	4.5kb 3' of SUR	Diabetes, permanent neonatal 2, with or without neurologic features	618856	Autosomal dominant	3	Kcnj11	CAMK2D
																		TLR5	Toll Like Receptor 5	Protein Coding	47	GC01M223109	24.3	https://www.genecards.org/cgi-bin/carddisp.pl?gene=TLR5	11p15.1	11:17385245-17389345	KCNJ11, BIR, PHHI, HHF2, TNDM3, MODY13, PNDM2	Potassium inwardly-rectifying channel, subfamily J, member 11	600937	KCNJ11	3767	ENSG00000187486,ENST00000339994.4	4.5kb 3' of SUR	Hyperinsulinemic hypoglycemia, familial, 2	601820	Autosomal recessive	3	Kcnj11	CANTU
																		NDUFS2	NADH:Ubiquinone Oxidoreductase Core Subunit S2	Protein Coding	44	GC01P161197	24.2	https://www.genecards.org/cgi-bin/carddisp.pl?gene=NDUFS2	11p15.1	11:17385245-17389345	KCNJ11, BIR, PHHI, HHF2, TNDM3, MODY13, PNDM2	Potassium inwardly-rectifying channel, subfamily J, member 11	600937	KCNJ11	3767	ENSG00000187486,ENST00000339994.4	4.5kb 3' of SUR	Maturity-onset diabetes of the young, type 13	616329	Autosomal dominant	3	Kcnj11	CAPN10
																		SURF1	SURF1 Cytochrome C Oxidase Assembly Factor	Protein Coding	43	GC09M133351	24.08	https://www.genecards.org/cgi-bin/carddisp.pl?gene=SURF1	11p15.1	11:17392497-17476848	ABCC8, SUR, PHHI, SUR1, HHF1, TNDM2, PNDM3	ATP-binding cassette, subfamily C, member 8 (sulfonylurea receptor)	600509	ABCC8	6833	ENSG00000006071,ENST00000389817.7		Diabetes mellitus, noninsulin-dependent	125853	Autosomal dominant	3	Abcc8	CAPN3
																		DPP4	Dipeptidyl Peptidase 4	Protein Coding	50	GC02M161992	24.03	https://www.genecards.org/cgi-bin/carddisp.pl?gene=DPP4	11p15.1	11:17392497-17476848	ABCC8, SUR, PHHI, SUR1, HHF1, TNDM2, PNDM3	ATP-binding cassette, subfamily C, member 8 (sulfonylurea receptor)	600509	ABCC8	6833	ENSG00000006071,ENST00000389817.7		Diabetes mellitus, permanent neonatal 3, with or without neurologic features	618857	Autosomal dominant; Autosomal recessive	3	Abcc8	CARTPT
																		MIR378A	MicroRNA 378a	RNA Gene	18	GC05P149732	23.96	https://www.genecards.org/cgi-bin/carddisp.pl?gene=MIR378A	11p15.1	11:17392497-17476848	ABCC8, SUR, PHHI, SUR1, HHF1, TNDM2, PNDM3	ATP-binding cassette, subfamily C, member 8 (sulfonylurea receptor)	600509	ABCC8	6833	ENSG00000006071,ENST00000389817.7		Diabetes mellitus, transient neonatal 2	610374		3	Abcc8	CASP1
																		ACAD9	Acyl-CoA Dehydrogenase Family Member 9	Protein Coding	43	GC03P130611	23.69	https://www.genecards.org/cgi-bin/carddisp.pl?gene=ACAD9	11p15.1	11:17392497-17476848	ABCC8, SUR, PHHI, SUR1, HHF1, TNDM2, PNDM3	ATP-binding cassette, subfamily C, member 8 (sulfonylurea receptor)	600509	ABCC8	6833	ENSG00000006071,ENST00000389817.7		Hyperinsulinemic hypoglycemia, familial, 1	256450	Autosomal dominant; Autosomal recessive	3	Abcc8	CASP12
																		MAPK14	Mitogen-Activated Protein Kinase 14	Protein Coding	51	GC06P047451	23.64	https://www.genecards.org/cgi-bin/carddisp.pl?gene=MAPK14	11p15.1	11:17392497-17476848	ABCC8, SUR, PHHI, SUR1, HHF1, TNDM2, PNDM3	ATP-binding cassette, subfamily C, member 8 (sulfonylurea receptor)	600509	ABCC8	6833	ENSG00000006071,ENST00000389817.7		Hypoglycemia of infancy, leucine-sensitive	240800	Autosomal dominant	3	Abcc8	CASP2
																		TMEM70	Transmembrane Protein 70	Protein Coding	38	GC08P073972	23.38	https://www.genecards.org/cgi-bin/carddisp.pl?gene=TMEM70	11p15.1	11:19182029-19201982	CSRP3, CRP3, CLP, CMD1M, CMH12	Cysteine- and glycine-rich protein 3	600824	CSRP3	8048	ENSG00000129170,ENST00000649842.1	mutation identified in 1 CMD1M family	?Cardiomyopathy, dilated, 1M	607482		3	Csrp3	CASP3
																		HADH	Hydroxyacyl-CoA Dehydrogenase	Protein Coding	47	GC04P107989	23.33	https://www.genecards.org/cgi-bin/carddisp.pl?gene=HADH	11p15.1	11:19182029-19201982	CSRP3, CRP3, CLP, CMD1M, CMH12	Cysteine- and glycine-rich protein 3	600824	CSRP3	8048	ENSG00000129170,ENST00000649842.1	mutation identified in 1 CMD1M family	Cardiomyopathy, hypertrophic, 12	612124	Autosomal dominant	3	Csrp3	CASP4
																		CNBP	CCHC-Type Zinc Finger Nucleic Acid Binding Protein	Protein Coding	41	GC03M129167	23.29	https://www.genecards.org/cgi-bin/carddisp.pl?gene=CNBP	11p11.2	11:45885650-45906464	MAPK8IP1, IB1	Mitogen-activated protein kinase 8-interacting protein 1	604641	MAPK8IP1	9479	ENSG00000121653,ENST00000241014.6		{Diabetes mellitus, noninsulin-dependent}	125853	Autosomal dominant	3	Mapk8ip1	CASP7
																		PPARGC1A	PPARG Coactivator 1 Alpha	Protein Coding	46	GC04M023755	23.28	https://www.genecards.org/cgi-bin/carddisp.pl?gene=PPARGC1A	11p11.2	11:47331405-47352701	MYBPC3, CMH4, CMD1MM, LVNC10	Myosin-binding protein C, cardiac	600958	MYBPC3	4607	ENSG00000134571,ENST00000545968.6		Cardiomyopathy, dilated, 1MM	615396	Autosomal dominant	3	Mybpc3	CASP8
																		IL4	Interleukin 4	Protein Coding	46	GC05P132673	23.14	https://www.genecards.org/cgi-bin/carddisp.pl?gene=IL4	11p11.2	11:47331405-47352701	MYBPC3, CMH4, CMD1MM, LVNC10	Myosin-binding protein C, cardiac	600958	MYBPC3	4607	ENSG00000134571,ENST00000545968.6		Cardiomyopathy, hypertrophic, 4	115197	Autosomal dominant; Autosomal recessive	3	Mybpc3	CASP9
																		CAV1	Caveolin 1	Protein Coding	48	GC07P116524	23.12	https://www.genecards.org/cgi-bin/carddisp.pl?gene=CAV1	11p11.2	11:47331405-47352701	MYBPC3, CMH4, CMD1MM, LVNC10	Myosin-binding protein C, cardiac	600958	MYBPC3	4607	ENSG00000134571,ENST00000545968.6		Left ventricular noncompaction 10	615396	Autosomal dominant	3	Mybpc3	CASQ2
																		IGFBP3	Insulin Like Growth Factor Binding Protein 3	Protein Coding	45	GC07M045912	23.07	https://www.genecards.org/cgi-bin/carddisp.pl?gene=IGFBP3	11q13	11:63600000-77400000	IDDM4	Insulin-dependent diabetes mellitus-4	600319		3403			{Diabetes mellitus, insulin-dependent, 4}	600319		2		CASR
																		LAMA2	Laminin Subunit Alpha 2	Protein Coding	43	GC06P128863	23.04	https://www.genecards.org/cgi-bin/carddisp.pl?gene=LAMA2	11q13.4	11:74000276-74009084	UCP3	Uncoupling protein-3	602044	UCP3	7352	ENSG00000175564,ENST00000314032.9		{Obesity, severe, and type II diabetes}	601665	Autosomal dominant; Autosomal recessive; Multifactorial	3	Ucp3	CAT
																		ALPK3	Alpha Kinase 3	Protein Coding	36	GC15P084816	23.02	https://www.genecards.org/cgi-bin/carddisp.pl?gene=ALPK3	11q14.3	11:92969650-92986240	MTNR1B	Melatonin receptor 1B	600804	MTNR1B	4544	ENSG00000134640,ENST00000257068.2		{Diabetes mellitus, type 2, susceptibility to}	125853	Autosomal dominant	3	Mtnr1b	CAV1
																		GCG	Glucagon	Protein Coding	41	GC02M162142	22.88	https://www.genecards.org/cgi-bin/carddisp.pl?gene=GCG	11q23.1	11:111908563-111923739	CRYAB, CRYA2, CTPP2, CMD1II, CTRCT16, MFM2	Crystallin, alpha B	123590	CRYAB	1410	ENSG00000109846,ENST00000616970.5		Cardiomyopathy, dilated, 1II	615184	Autosomal dominant	3	Cryab	CAV3
																		HBB	Hemoglobin Subunit Beta	Protein Coding	45	GC11M005352	22.78	https://www.genecards.org/cgi-bin/carddisp.pl?gene=HBB	11q23.1	11:111908563-111923739	CRYAB, CRYA2, CTPP2, CMD1II, CTRCT16, MFM2	Crystallin, alpha B	123590	CRYAB	1410	ENSG00000109846,ENST00000616970.5		Cataract 16, multiple types	613763	Autosomal dominant; Autosomal recessive	3	Cryab	CAVIN1
																		GUSB	Glucuronidase Beta	Protein Coding	47	GC07M065960	22.68	https://www.genecards.org/cgi-bin/carddisp.pl?gene=GUSB	11q23.1	11:111908563-111923739	CRYAB, CRYA2, CTPP2, CMD1II, CTRCT16, MFM2	Crystallin, alpha B	123590	CRYAB	1410	ENSG00000109846,ENST00000616970.5		Myopathy, myofibrillar, 2	608810	Autosomal dominant	3	Cryab	CAVIN4
																		GYG1	Glycogenin 1	Protein Coding	45	GC03P148991	22.66	https://www.genecards.org/cgi-bin/carddisp.pl?gene=GYG1	11q23.1	11:111908563-111923739	CRYAB, CRYA2, CTPP2, CMD1II, CTRCT16, MFM2	Crystallin, alpha B	123590	CRYAB	1410	ENSG00000109846,ENST00000616970.5		Myopathy, myofibrillar, fatal infantile hypertonic, alpha-B crystallin-related	613869	Autosomal recessive	3	Cryab	CBL
																		NOS2	Nitric Oxide Synthase 2	Protein Coding	49	GC17M027756	22.61	https://www.genecards.org/cgi-bin/carddisp.pl?gene=NOS2	12p12.1	12:21354958-21379979	IAPP	Islet amyloid polypeptide (diabetes-associated peptide; amylin)	147940	IAPP	3375	ENSG00000121351,ENST00000240652.8					Iapp		Cbr1
																		NFE2L2	Nuclear Factor, Erythroid 2 Like 2	Protein Coding	48	GC02M177227	22.43	https://www.genecards.org/cgi-bin/carddisp.pl?gene=NFE2L2	12p12.1	12:21797388-21941862	ABCC9, SUR2, CMD1O, ATFB12, CANTU	ATP-binding cassette, subfamily C, member 9 (sulfonylurea receptor 2)	601439	ABCC9	10060	ENSG00000069431,ENST00000544039.5	mutation identified in 1 ATFB12 patient	?Atrial fibrillation, familial, 12	614050	Autosomal dominant	3	Abcc9	CCCKR5
																		TFR2	Transferrin Receptor 2	Protein Coding	44	GC07M100620	22.4	https://www.genecards.org/cgi-bin/carddisp.pl?gene=TFR2	12p12.1	12:21797388-21941862	ABCC9, SUR2, CMD1O, ATFB12, CANTU	ATP-binding cassette, subfamily C, member 9 (sulfonylurea receptor 2)	601439	ABCC9	10060	ENSG00000069431,ENST00000544039.5	mutation identified in 1 ATFB12 patient	Cardiomyopathy, dilated, 1O	608569	Autosomal dominant	3	Abcc9	CCDD
																		NDUFV2	NADH:Ubiquinone Oxidoreductase Core Subunit V2	Protein Coding	44	GC18P009092	22.37	https://www.genecards.org/cgi-bin/carddisp.pl?gene=NDUFV2	12p12.1	12:21797388-21941862	ABCC9, SUR2, CMD1O, ATFB12, CANTU	ATP-binding cassette, subfamily C, member 9 (sulfonylurea receptor 2)	601439	ABCC9	10060	ENSG00000069431,ENST00000544039.5	mutation identified in 1 ATFB12 patient	Hypertrichotic osteochondrodysplasia	239850	Autosomal dominant	3	Abcc9	CCK
																		TWNK	Twinkle MtDNA Helicase	Protein Coding	33	GC10P100993	22.32	https://www.genecards.org/cgi-bin/carddisp.pl?gene=TWNK	12q13.12	12:49950736-49958877	AQP2	Aquaporin-2 (collecting duct)	107777	AQP2	359	ENSG00000167580,ENST00000199280.3		Diabetes insipidus, nephrogenic	125800	Autosomal dominant; Autosomal recessive	3	Aqp2	CCL11
																		CIDEC	Cell Death Inducing DFFA Like Effector C	Protein Coding	41	GC03M009866	22.24	https://www.genecards.org/cgi-bin/carddisp.pl?gene=CIDEC	12q24.11	12:110910844-110920578	MYL2, CMH10	Myosin, light polypeptide-2, regulatory, cardiac, slow	160781	MYL2	4633	ENSG00000111245,ENST00000228841.14		Cardiomyopathy, hypertrophic, 10	608758	Autosomal dominant	3	Myl2	CCL2
																		COX10	Cytochrome C Oxidase Assembly Factor Heme A:Farnesyltransferase COX10	Protein Coding	43	GC17P014069	22.13	https://www.genecards.org/cgi-bin/carddisp.pl?gene=COX10	12q24.2	12:113900000-120300000	NIDDM2	Diabetes mellitus, noninsulin-dependent, 2	601407		4813		no mutations found in HNF1A	Diabetes mellitus, noninsulin-dependent, 2	601407		2		CCL3
																		NDUFS8	NADH:Ubiquinone Oxidoreductase Core Subunit S8	Protein Coding	45	GC11P068030	22.09	https://www.genecards.org/cgi-bin/carddisp.pl?gene=NDUFS8	12q24.31	12:120977682-121002511	HNF1A, TCF1, MODY3, IDDM20	HNF1 homeobox B	142410	HNF1A	6927	ENSG00000135100,ENST00000257555.10		{Diabetes mellitus, insulin-dependent}	222100	Autosomal recessive	3	Hnf1a	CCL5
																		NDUFAF2	NADH:Ubiquinone Oxidoreductase Complex Assembly Factor 2	Protein Coding	40	GC05P060945	22.05	https://www.genecards.org/cgi-bin/carddisp.pl?gene=NDUFAF2	12q24.31	12:120977682-121002511	HNF1A, TCF1, MODY3, IDDM20	HNF1 homeobox B	142410	HNF1A	6927	ENSG00000135100,ENST00000257555.10		{Diabetes mellitus, noninsulin-dependent, 2}	125853	Autosomal dominant	3	Hnf1a	CCN2
																		VWF	Von Willebrand Factor	Protein Coding	48	GC12M005917	22.05	https://www.genecards.org/cgi-bin/carddisp.pl?gene=VWF	12q24.31	12:120977682-121002511	HNF1A, TCF1, MODY3, IDDM20	HNF1 homeobox B	142410	HNF1A	6927	ENSG00000135100,ENST00000257555.10		Diabetes mellitus, insulin-dependent, 20	612520		3	Hnf1a	CCND1
																		MT-ATP8	Mitochondrially Encoded ATP Synthase Membrane Subunit 8	Protein Coding	28	GCMTP008368	22.02	https://www.genecards.org/cgi-bin/carddisp.pl?gene=MT-ATP8	12q24.31	12:120977682-121002511	HNF1A, TCF1, MODY3, IDDM20	HNF1 homeobox B	142410	HNF1A	6927	ENSG00000135100,ENST00000257555.10		Hepatic adenoma, somatic	142330		3	Hnf1a	CCR2
																		MT-TS2	Mitochondrially Encoded TRNA-Ser (AGU/C) 2	RNA Gene	13	GCMTP012215	21.97	https://www.genecards.org/cgi-bin/carddisp.pl?gene=MT-TS2	12q24.31	12:120977682-121002511	HNF1A, TCF1, MODY3, IDDM20	HNF1 homeobox B	142410	HNF1A	6927	ENSG00000135100,ENST00000257555.10		MODY, type III	600496	Autosomal dominant	3	Hnf1a	CCR5
																		BMP6	Bone Morphogenetic Protein 6	Protein Coding	43	GC06P007726	21.91	https://www.genecards.org/cgi-bin/carddisp.pl?gene=BMP6	12q24.31	12:120977682-121002511	HNF1A, TCF1, MODY3, IDDM20	HNF1 homeobox B	142410	HNF1A	6927	ENSG00000135100,ENST00000257555.10		Renal cell carcinoma	144700		3	Hnf1a	CCR6
																		NDUFA1	NADH:Ubiquinone Oxidoreductase Subunit A1	Protein Coding	44	GC0XP119871	21.91	https://www.genecards.org/cgi-bin/carddisp.pl?gene=NDUFA1	13q12.2	13:27919981-27926312	PDX1, IPF1, MODY4, PAGEN1	Pancreas/duodenum homeobox protein 1	600733	PDX1	3651	ENSG00000139515,ENST00000381033.5		{Diabetes mellitus, type II, susceptibility to}	125853	Autosomal dominant	3	Pdx1	CD163
																		CISD2	CDGSH Iron Sulfur Domain 2	Protein Coding	41	GC04P102868	21.84	https://www.genecards.org/cgi-bin/carddisp.pl?gene=CISD2	13q12.2	13:27919981-27926312	PDX1, IPF1, MODY4, PAGEN1	Pancreas/duodenum homeobox protein 1	600733	PDX1	3651	ENSG00000139515,ENST00000381033.5		MODY, type IV	606392		3	Pdx1	CD19
																		MEG3	Maternally Expressed 3	RNA Gene	29	GC14P104771	21.84	https://www.genecards.org/cgi-bin/carddisp.pl?gene=MEG3	13q12.2	13:27919981-27926312	PDX1, IPF1, MODY4, PAGEN1	Pancreas/duodenum homeobox protein 1	600733	PDX1	3651	ENSG00000139515,ENST00000381033.5		Pancreatic agenesis 1	260370	Autosomal recessive	3	Pdx1	CD1C
																		CDKN3	Cyclin Dependent Kinase Inhibitor 3	Protein Coding	42	GC14P054398	21.8	https://www.genecards.org/cgi-bin/carddisp.pl?gene=CDKN3	13q22.2	13:75283502-75483143	TBC1D4, AS160, KIAA0603, NIDDM5	TPC1 domain family, member 4	612465	TBC1D4	9882	ENSG00000136111,ENST00000431480.6		{Diabetes mellitus, noninsulin-dependent, 5}	616087		3	Tbc1d4	CD1D
																		MIR17	MicroRNA 17	RNA Gene	21	GC13P091350	21.8	https://www.genecards.org/cgi-bin/carddisp.pl?gene=MIR17	13q32.1	13:95677138-95794987	DNAJC3, PRKRI, P58, ACPHD	DnaJ, E. coli, homolog of, subfamily C, member 3 (protein kinase inhibitor p58)	601184	DNAJC3	5611	ENSG00000102580,ENST00000602402.6	mutation identified in 1 ACPHD family	?Ataxia, combined cerebellar and peripheral, with hearing loss and diabetes mellitus	616192	Autosomal recessive	3	Dnajc3	CD248
																		APPL1	Adaptor Protein, Phosphotyrosine Interacting With PH Domain And Leucine Zipper 1	Protein Coding	45	GC03P057227	21.8	https://www.genecards.org/cgi-bin/carddisp.pl?gene=APPL1	13q34	13:109752694-109786582	IRS2	Insulin receptor substrate 2	600797	IRS2	8660	ENSG00000185950,ENST00000375856.5		{Diabetes mellitus, noninsulin-dependent}	125853	Autosomal dominant	3	Irs2	CD25
																		HYMAI	Hydatidiform Mole Associated And Imprinted	RNA Gene	21	GC06M144002	21.79	https://www.genecards.org/cgi-bin/carddisp.pl?gene=HYMAI	14q11.2	14:23381986-23408272	MYH6, ASD3, MYHCA, CMD1EE, CMH14, SSS3	Myosin, heavy polypeptide-6, cardiac muscle, alpha	160710	MYH6	4624	ENSG00000197616,ENST00000405093.8		{Sick sinus syndrome 3}	614090		3	Myh6	CD274
																		TH	Tyrosine Hydroxylase	Protein Coding	51	GC11M002163	21.77	https://www.genecards.org/cgi-bin/carddisp.pl?gene=TH	14q11.2	14:23381986-23408272	MYH6, ASD3, MYHCA, CMD1EE, CMH14, SSS3	Myosin, heavy polypeptide-6, cardiac muscle, alpha	160710	MYH6	4624	ENSG00000197616,ENST00000405093.8		Atrial septal defect 3	614089		3	Myh6	CD28
																		XK	X-Linked Kx Blood Group	Protein Coding	40	GC0XP037685	21.68	https://www.genecards.org/cgi-bin/carddisp.pl?gene=XK	14q11.2	14:23381986-23408272	MYH6, ASD3, MYHCA, CMD1EE, CMH14, SSS3	Myosin, heavy polypeptide-6, cardiac muscle, alpha	160710	MYH6	4624	ENSG00000197616,ENST00000405093.8		Cardiomyopathy, dilated, 1EE	613252		3	Myh6	CD2AP
																		SST	Somatostatin	Protein Coding	42	GC03M187668	21.49	https://www.genecards.org/cgi-bin/carddisp.pl?gene=SST	14q11.2	14:23381986-23408272	MYH6, ASD3, MYHCA, CMD1EE, CMH14, SSS3	Myosin, heavy polypeptide-6, cardiac muscle, alpha	160710	MYH6	4624	ENSG00000197616,ENST00000405093.8		Cardiomyopathy, hypertrophic, 14	613251	Autosomal dominant	3	Myh6	CD34
																		MT-ND2	Mitochondrially Encoded NADH:Ubiquinone Oxidoreductase Core Subunit 2	Protein Coding	32	GCMTP004472	21.4	https://www.genecards.org/cgi-bin/carddisp.pl?gene=MT-ND2	14q11.2	14:23412739-23435676	MYH7, CMH1, MPD1, CMD1S, SPMM, SPMD	Myosin, heavy polypeptide-7, cardiac muscle, beta	160760	MYH7	4625	ENSG00000092054,ENST00000355349.4	5'-B-4.5kb-A-3'	Cardiomyopathy, dilated, 1S	613426	Autosomal dominant	3	Myh7	CD36
																		MIR483	MicroRNA 483	RNA Gene	18	GC11M002188	21.27	https://www.genecards.org/cgi-bin/carddisp.pl?gene=MIR483	14q11.2	14:23412739-23435676	MYH7, CMH1, MPD1, CMD1S, SPMM, SPMD	Myosin, heavy polypeptide-7, cardiac muscle, beta	160760	MYH7	4625	ENSG00000092054,ENST00000355349.4	5'-B-4.5kb-A-3'	Cardiomyopathy, hypertrophic, 1	192600	Autosomal dominant; Digenic dominant	3	Myh7	CD38
																		CASR	Calcium Sensing Receptor	Protein Coding	50	GC03P122183	21.23	https://www.genecards.org/cgi-bin/carddisp.pl?gene=CASR	14q11.2	14:23412739-23435676	MYH7, CMH1, MPD1, CMD1S, SPMM, SPMD	Myosin, heavy polypeptide-7, cardiac muscle, beta	160760	MYH7	4625	ENSG00000092054,ENST00000355349.4	5'-B-4.5kb-A-3'	Laing distal myopathy	160500	Autosomal dominant	3	Myh7	CD4
																		NEBL	Nebulette	Protein Coding	39	GC10M020779	21.2	https://www.genecards.org/cgi-bin/carddisp.pl?gene=NEBL	14q11.2	14:23412739-23435676	MYH7, CMH1, MPD1, CMD1S, SPMM, SPMD	Myosin, heavy polypeptide-7, cardiac muscle, beta	160760	MYH7	4625	ENSG00000092054,ENST00000355349.4	5'-B-4.5kb-A-3'	Left ventricular noncompaction 5	613426	Autosomal dominant	3	Myh7	CD40
																		MIR127	MicroRNA 127	RNA Gene	20	GC14P104580	21.17	https://www.genecards.org/cgi-bin/carddisp.pl?gene=MIR127	14q11.2	14:23412739-23435676	MYH7, CMH1, MPD1, CMD1S, SPMM, SPMD	Myosin, heavy polypeptide-7, cardiac muscle, beta	160760	MYH7	4625	ENSG00000092054,ENST00000355349.4	5'-B-4.5kb-A-3'	Myopathy, myosin storage, autosomal dominant	608358	Autosomal dominant	3	Myh7	CD40LG
																		SLC25A20	Solute Carrier Family 25 Member 20	Protein Coding	46	GC03M048869	21.17	https://www.genecards.org/cgi-bin/carddisp.pl?gene=SLC25A20	14q11.2	14:23412739-23435676	MYH7, CMH1, MPD1, CMD1S, SPMM, SPMD	Myosin, heavy polypeptide-7, cardiac muscle, beta	160760	MYH7	4625	ENSG00000092054,ENST00000355349.4	5'-B-4.5kb-A-3'	Myopathy, myosin storage, autosomal recessive	255160	Autosomal recessive	3	Myh7	CD44
																		MIR140	MicroRNA 140	RNA Gene	22	GC16P069934	21.16	https://www.genecards.org/cgi-bin/carddisp.pl?gene=MIR140	14q11.2	14:23412739-23435676	MYH7, CMH1, MPD1, CMD1S, SPMM, SPMD	Myosin, heavy polypeptide-7, cardiac muscle, beta	160760	MYH7	4625	ENSG00000092054,ENST00000355349.4	5'-B-4.5kb-A-3'	Scapuloperoneal syndrome, myopathic type	181430	Autosomal dominant	3	Myh7	CD63
																		ACADS	Acyl-CoA Dehydrogenase Short Chain	Protein Coding	46	GC12P120843	21.11	https://www.genecards.org/cgi-bin/carddisp.pl?gene=ACADS	14q24.2	14:73136435-73223690	PSEN1, AD3, ACNINV3	Presenilin 1	104311	PSEN1	5663	ENSG00000080815,ENST00000324501.10	mutation identified in 1 ACNINV3 family	?Acne inversa, familial, 3	613737	Autosomal dominant	3	Psen1	CD68
																		CASP3	Caspase 3	Protein Coding	50	GC04M184627	21.04	https://www.genecards.org/cgi-bin/carddisp.pl?gene=CASP3	14q24.2	14:73136435-73223690	PSEN1, AD3, ACNINV3	Presenilin 1	104311	PSEN1	5663	ENSG00000080815,ENST00000324501.10	mutation identified in 1 ACNINV3 family	Alzheimer disease, type 3	607822	Autosomal dominant	3	Psen1	CD69
																		TRMT5	TRNA Methyltransferase 5	Protein Coding	38	GC14M060971	21.01	https://www.genecards.org/cgi-bin/carddisp.pl?gene=TRMT5	14q24.2	14:73136435-73223690	PSEN1, AD3, ACNINV3	Presenilin 1	104311	PSEN1	5663	ENSG00000080815,ENST00000324501.10	mutation identified in 1 ACNINV3 family	Alzheimer disease, type 3, with spastic paraparesis and apraxia	607822	Autosomal dominant	3	Psen1	Cd74
																		MMP1	Matrix Metallopeptidase 1	Protein Coding	51	GC11M102810	20.96	https://www.genecards.org/cgi-bin/carddisp.pl?gene=MMP1	14q24.2	14:73136435-73223690	PSEN1, AD3, ACNINV3	Presenilin 1	104311	PSEN1	5663	ENSG00000080815,ENST00000324501.10	mutation identified in 1 ACNINV3 family	Alzheimer disease, type 3, with spastic paraparesis and unusual plaques	607822	Autosomal dominant	3	Psen1	CD79A
																		IFNG	Interferon Gamma	Protein Coding	48	GC12M068064	20.94	https://www.genecards.org/cgi-bin/carddisp.pl?gene=IFNG	14q24.2	14:73136435-73223690	PSEN1, AD3, ACNINV3	Presenilin 1	104311	PSEN1	5663	ENSG00000080815,ENST00000324501.10	mutation identified in 1 ACNINV3 family	Cardiomyopathy, dilated, 1U	613694	Autosomal dominant	3	Psen1	CD80
																		MAP2K2	Mitogen-Activated Protein Kinase Kinase 2	Protein Coding	53	GC19M004090	20.89	https://www.genecards.org/cgi-bin/carddisp.pl?gene=MAP2K2	14q24.2	14:73136435-73223690	PSEN1, AD3, ACNINV3	Presenilin 1	104311	PSEN1	5663	ENSG00000080815,ENST00000324501.10	mutation identified in 1 ACNINV3 family	Dementia, frontotemporal	600274	Autosomal dominant	3	Psen1	CD86
																		GAPDH	Glyceraldehyde-3-Phosphate Dehydrogenase	Protein Coding	48	GC12P008161	20.88	https://www.genecards.org/cgi-bin/carddisp.pl?gene=GAPDH	14q24.2	14:73136435-73223690	PSEN1, AD3, ACNINV3	Presenilin 1	104311	PSEN1	5663	ENSG00000080815,ENST00000324501.10	mutation identified in 1 ACNINV3 family	Pick disease	172700	Autosomal dominant	3	Psen1	CD8A
																		MAPK1	Mitogen-Activated Protein Kinase 1	Protein Coding	51	GC22M021754	20.77	https://www.genecards.org/cgi-bin/carddisp.pl?gene=MAPK1	14q24.3-q31	14:73300000-89300000	IDDM11	Insulin-dependent diabetes mellitus-11	601208		3410			{Diabetes mellitus, insulin-dependent, 11}	601208		2		CDAN1
																		ANKRD1	Ankyrin Repeat Domain 1	Protein Coding	42	GC10M090912	20.74	https://www.genecards.org/cgi-bin/carddisp.pl?gene=ANKRD1	15q14	15:34790229-34795548	ACTC1, CMD1R, CMH11, ASD5, LVNC4	Actin, alpha, cardiac muscle	102540	ACTC1	70	ENSG00000159251,ENST00000290378.6		Atrial septal defect 5	612794	Autosomal dominant	3	Actc1	CDC123
																		IGFBP1	Insulin Like Growth Factor Binding Protein 1	Protein Coding	43	GC07P046552	20.66	https://www.genecards.org/cgi-bin/carddisp.pl?gene=IGFBP1	15q14	15:34790229-34795548	ACTC1, CMD1R, CMH11, ASD5, LVNC4	Actin, alpha, cardiac muscle	102540	ACTC1	70	ENSG00000159251,ENST00000290378.6		Cardiomyopathy, dilated, 1R	613424	Autosomal dominant	3	Actc1	CDC42SE1
																		IL2	Interleukin 2	Protein Coding	45	GC04M122451	20.65	https://www.genecards.org/cgi-bin/carddisp.pl?gene=IL2	15q14	15:34790229-34795548	ACTC1, CMD1R, CMH11, ASD5, LVNC4	Actin, alpha, cardiac muscle	102540	ACTC1	70	ENSG00000159251,ENST00000290378.6		Cardiomyopathy, hypertrophic, 11	612098	Autosomal dominant	3	Actc1	CDCD2
																		NRAS	NRAS Proto-Oncogene, GTPase	Protein Coding	50	GC01M114704	20.62	https://www.genecards.org/cgi-bin/carddisp.pl?gene=NRAS	15q14	15:34790229-34795548	ACTC1, CMD1R, CMH11, ASD5, LVNC4	Actin, alpha, cardiac muscle	102540	ACTC1	70	ENSG00000159251,ENST00000290378.6		Left ventricular noncompaction 4	613424	Autosomal dominant	3	Actc1	CDCD3
																		GJA5	Gap Junction Protein Alpha 5	Protein Coding	45	GC01M147756	20.6	https://www.genecards.org/cgi-bin/carddisp.pl?gene=GJA5	15q21.3	15:58410456-58569843	LIPC, HL, LIPH, HDLCQ12	Lipase C, hepatic	151670	LIPC	3990	ENSG00000166035,ENST00000299022.10		[High density lipoprotein cholesterol level QTL 12]	612797		3	Lipc	CDH1
																		LMNB2	Lamin B2	Protein Coding	43	GC19M002439	20.58	https://www.genecards.org/cgi-bin/carddisp.pl?gene=LMNB2	15q21.3	15:58410456-58569843	LIPC, HL, LIPH, HDLCQ12	Lipase C, hepatic	151670	LIPC	3990	ENSG00000166035,ENST00000299022.10		{Diabetes mellitus, noninsulin-dependent}	125853	Autosomal dominant	3	Lipc	CDH2
																		NDUFB9	NADH:Ubiquinone Oxidoreductase Subunit B9	Protein Coding	44	GC08P124539	20.39	https://www.genecards.org/cgi-bin/carddisp.pl?gene=NDUFB9	15q21.3	15:58410456-58569843	LIPC, HL, LIPH, HDLCQ12	Lipase C, hepatic	151670	LIPC	3990	ENSG00000166035,ENST00000299022.10		Hepatic lipase deficiency	614025	Autosomal recessive	3	Lipc	CDH23
																		HMOX1	Heme Oxygenase 1	Protein Coding	52	GC22P035380	20.34	https://www.genecards.org/cgi-bin/carddisp.pl?gene=HMOX1	15q22.2	15:63042697-63071914	TPM1, CMH3, CMD1Y , LVNC9	Tropomyosin 1, alpha	191010	TPM1	7168	ENSG00000140416,ENST00000288398.10		Cardiomyopathy, dilated, 1Y	611878	Autosomal dominant	3		CDH5
																		TLR3	Toll Like Receptor 3	Protein Coding	52	GC04P186059	20.33	https://www.genecards.org/cgi-bin/carddisp.pl?gene=TLR3	15q22.2	15:63042697-63071914	TPM1, CMH3, CMD1Y , LVNC9	Tropomyosin 1, alpha	191010	TPM1	7168	ENSG00000140416,ENST00000288398.10		Cardiomyopathy, hypertrophic, 3	115196	Autosomal dominant	3		CDIN1
																		MT-TH	Mitochondrially Encoded TRNA-His (CAU/C)	RNA Gene	13	GCMTP012140	20.31	https://www.genecards.org/cgi-bin/carddisp.pl?gene=MT-TH	15q22.2	15:63042697-63071914	TPM1, CMH3, CMD1Y , LVNC9	Tropomyosin 1, alpha	191010	TPM1	7168	ENSG00000140416,ENST00000288398.10		Left ventricular noncompaction 9	611878	Autosomal dominant	3		Cdk1
																		B2M	Beta-2-Microglobulin	Protein Coding	48	GC15P044711	20.26	https://www.genecards.org/cgi-bin/carddisp.pl?gene=B2M	15q25.3	15:84817355-84873478	ALPK3, MIDORI, KIAA1330, CMH27	Alpha kinase 3	617608	ALPK3	57538	ENSG00000136383,ENST00000258888.5		Cardiomyopathy, familial hypertrophic 27	618052	Autosomal recessive	3	Alpk3	CDK4
																		COX15	Cytochrome C Oxidase Assembly Homolog COX15	Protein Coding	42	GC10M099696	20.23	https://www.genecards.org/cgi-bin/carddisp.pl?gene=COX15	15q26	15:88500000-101991189	IDDM3	Insulin-dependent diabetes mellitus-3	600318		3402			{Diabetes mellitus, insulin-dependent, 3}	600318		2		CDKAL1
																		CD40LG	CD40 Ligand	Protein Coding	47	GC0XP136649	20.17	https://www.genecards.org/cgi-bin/carddisp.pl?gene=CD40LG	16q22.1	16:66921684-66925534	RRAD	Ras-related associated with diabetes	179503	RRAD	6236	ENSG00000166592,ENST00000420652.5					Rrad		CDKN1A
																		MYLK2	Myosin Light Chain Kinase 2	Protein Coding	47	GC20P031819	20.17	https://www.genecards.org/cgi-bin/carddisp.pl?gene=MYLK2	16q24.1	16:86566828-86569727	FOXC2, FKHL14, MFH1	Forkhead box C2	602402	FOXC2	2303	ENSG00000176692,ENST00000649859.1		Lymphedema-distichiasis syndrome	153400	Autosomal dominant	3	Foxc2	CDKN1B
																		IL17A	Interleukin 17A	Protein Coding	42	GC06P052186	20.08	https://www.genecards.org/cgi-bin/carddisp.pl?gene=IL17A	16q24.1	16:86566828-86569727	FOXC2, FKHL14, MFH1	Forkhead box C2	602402	FOXC2	2303	ENSG00000176692,ENST00000649859.1		Lymphedema-distichiasis syndrome with renal disease and diabetes mellitus	153400	Autosomal dominant	3	Foxc2	CDKN1C
																		MLXIPL	MLX Interacting Protein Like	Protein Coding	41	GC07M073593	20.03	https://www.genecards.org/cgi-bin/carddisp.pl?gene=MLXIPL	17q12	17:37686430-37745058	HNF1B, TCF2, HNF2, MODY5, FJHN, HPC11	HNF1 homeobox B (transcription factor 2)	189907	HNF1B	6928	ENSG00000275410,ENST00000617811.5		{Renal cell carcinoma}	144700		3	Hnf1b	CDKN2A
																		INS-IGF2	INS-IGF2 Readthrough	Protein Coding	27	GC11M002187	19.97	https://www.genecards.org/cgi-bin/carddisp.pl?gene=INS-IGF2	17q12	17:37686430-37745058	HNF1B, TCF2, HNF2, MODY5, FJHN, HPC11	HNF1 homeobox B (transcription factor 2)	189907	HNF1B	6928	ENSG00000275410,ENST00000617811.5		Diabetes mellitus, noninsulin-dependent	125853	Autosomal dominant	3	Hnf1b	CDKN2B-AS1
																		COQ2	Coenzyme Q2, Polyprenyltransferase	Protein Coding	41	GC04M083261	19.96	https://www.genecards.org/cgi-bin/carddisp.pl?gene=COQ2	17q12	17:37686430-37745058	HNF1B, TCF2, HNF2, MODY5, FJHN, HPC11	HNF1 homeobox B (transcription factor 2)	189907	HNF1B	6928	ENSG00000275410,ENST00000617811.5		Renal cysts and diabetes syndrome	137920	Autosomal dominant	3	Hnf1b	CDKN3
																		GH1	Growth Hormone 1	Protein Coding	44	GC17M063917	19.94	https://www.genecards.org/cgi-bin/carddisp.pl?gene=GH1	17q12	17:39665348-39666553	TCAP, LGMDR7, CMH25	Telethonin	604488	TCAP	8557	ENSG00000173991,ENST00000309889.3		Cardiomyopathy, hypertrophic, 25	607487	Autosomal dominant	3	Tcap	CDON
																		ELAC2	ElaC Ribonuclease Z 2	Protein Coding	42	GC17M012991	19.94	https://www.genecards.org/cgi-bin/carddisp.pl?gene=ELAC2	17q12	17:39665348-39666553	TCAP, LGMDR7, CMH25	Telethonin	604488	TCAP	8557	ENSG00000173991,ENST00000309889.3		Muscular dystrophy, limb-girdle, autosomal recessive 7	601954	Autosomal recessive	3	Tcap	CEACAM1
																		SERPINA3	Serpin Family A Member 3	Protein Coding	43	GC14P094612	19.9	https://www.genecards.org/cgi-bin/carddisp.pl?gene=SERPINA3	17q23.3	17:63477060-63498372	ACE, DCP1, ACE1, MVCD3, ICH	Angiotensin I converting enzyme (dipeptidyl carboxypeptidase-1)	106180	ACE	1636	ENSG00000159640,ENST00000290866.10		[Angiotensin I-converting enzyme, benign serum increase]			3	Ace	CEACAM5
																		MT-ND3	Mitochondrially Encoded NADH:Ubiquinone Oxidoreductase Core Subunit 3	Protein Coding	31	GCMTP010061	19.89	https://www.genecards.org/cgi-bin/carddisp.pl?gene=MT-ND3	17q23.3	17:63477060-63498372	ACE, DCP1, ACE1, MVCD3, ICH	Angiotensin I converting enzyme (dipeptidyl carboxypeptidase-1)	106180	ACE	1636	ENSG00000159640,ENST00000290866.10		{Microvascular complications of diabetes 3}	612624		3	Ace	CEBPA
																		GTPBP3	GTP Binding Protein 3, Mitochondrial	Protein Coding	40	GC19P023303	19.86	https://www.genecards.org/cgi-bin/carddisp.pl?gene=GTPBP3	17q23.3	17:63477060-63498372	ACE, DCP1, ACE1, MVCD3, ICH	Angiotensin I converting enzyme (dipeptidyl carboxypeptidase-1)	106180	ACE	1636	ENSG00000159640,ENST00000290866.10		{Myocardial infarction, susceptibility to}			3	Ace	CEL
																		IL2RA	Interleukin 2 Receptor Subunit Alpha	Protein Coding	50	GC10M006010	19.84	https://www.genecards.org/cgi-bin/carddisp.pl?gene=IL2RA	17q23.3	17:63477060-63498372	ACE, DCP1, ACE1, MVCD3, ICH	Angiotensin I converting enzyme (dipeptidyl carboxypeptidase-1)	106180	ACE	1636	ENSG00000159640,ENST00000290866.10		{SARS, progression of}			3	Ace	CELIAC3
																		DTNA	Dystrobrevin Alpha	Protein Coding	42	GC18P034493	19.84	https://www.genecards.org/cgi-bin/carddisp.pl?gene=DTNA	17q23.3	17:63477060-63498372	ACE, DCP1, ACE1, MVCD3, ICH	Angiotensin I converting enzyme (dipeptidyl carboxypeptidase-1)	106180	ACE	1636	ENSG00000159640,ENST00000290866.10		{Stroke, hemorrhagic}	614519		3	Ace	CELL
																		THBD	Thrombomodulin	Protein Coding	44	GC20M023026	19.82	https://www.genecards.org/cgi-bin/carddisp.pl?gene=THBD	17q23.3	17:63477060-63498372	ACE, DCP1, ACE1, MVCD3, ICH	Angiotensin I converting enzyme (dipeptidyl carboxypeptidase-1)	106180	ACE	1636	ENSG00000159640,ENST00000290866.10		Renal tubular dysgenesis	267430	Autosomal recessive	3	Ace	CEP290
																		NDUFS7	NADH:Ubiquinone Oxidoreductase Core Subunit S7	Protein Coding	46	GC19P001490	19.79	https://www.genecards.org/cgi-bin/carddisp.pl?gene=NDUFS7	18q12.1	18:31498176-31549007	DSG2, ARVD10, ARVC10, CMD1BB	Desmoglein-2	125671	DSG2	1829	ENSG00000046604,ENST00000261590.13		Arrhythmogenic right ventricular dysplasia 10	610193	Autosomal dominant	3	Dsg2	CEP295
																		CDKAL1	CDK5 Regulatory Subunit Associated Protein 1 Like 1	Protein Coding	39	GC06P020534	19.78	https://www.genecards.org/cgi-bin/carddisp.pl?gene=CDKAL1	18q12.1	18:31498176-31549007	DSG2, ARVD10, ARVC10, CMD1BB	Desmoglein-2	125671	DSG2	1829	ENSG00000046604,ENST00000261590.13		Cardiomyopathy, dilated, 1BB	612877		3	Dsg2	CERKL
																		MIR29C	MicroRNA 29c	RNA Gene	18	GC01M207802	19.76	https://www.genecards.org/cgi-bin/carddisp.pl?gene=MIR29C	18q21	18:45900000-63900000	IDDM6	Insulin-dependent diabetes mellitus-6	601941		3405			{Diabetes mellitus, insulin-dependent, 6}	601941		2		CERS5
																		STAR	Steroidogenic Acute Regulatory Protein	Protein Coding	46	GC08M038145	19.74	https://www.genecards.org/cgi-bin/carddisp.pl?gene=STAR	18q21.1	18:47152833-47176363	IER3IP1, MEDS	Immediate-early response 3-interacting protein 1	609382	IER3IP1	51124	ENSG00000134049,ENST00000256433.6		Microcephaly, epilepsy, and diabetes syndrome	614231	Autosomal recessive	3	Ier3ip1	Ces1f /// Cesl1
																		IL18	Interleukin 18	Protein Coding	44	GC11M112143	19.71	https://www.genecards.org/cgi-bin/carddisp.pl?gene=IL18	19p13.2	19:7112256-7294413	INSR, HHF5	Insulin receptor	147670	INSR	3643	ENSG00000171105,ENST00000302850.10	1 gene for alpha and beta subunits	Diabetes mellitus, insulin-resistant, with acanthosis nigricans	610549		3	Insr	CFAP410
																		BMP2	Bone Morphogenetic Protein 2	Protein Coding	47	GC20P006696	19.62	https://www.genecards.org/cgi-bin/carddisp.pl?gene=BMP2	19p13.2	19:7112256-7294413	INSR, HHF5	Insulin receptor	147670	INSR	3643	ENSG00000171105,ENST00000302850.10	1 gene for alpha and beta subunits	Hyperinsulinemic hypoglycemia, familial, 5	609968	Autosomal dominant	3	Insr	CFAP47
																		GSN	Gelsolin	Protein Coding	48	GC09P121201	19.55	https://www.genecards.org/cgi-bin/carddisp.pl?gene=GSN	19p13.2	19:7112256-7294413	INSR, HHF5	Insulin receptor	147670	INSR	3643	ENSG00000171105,ENST00000302850.10	1 gene for alpha and beta subunits	Leprechaunism	246200	Autosomal recessive	3	Insr	CFD
																		GPT	Glutamic--Pyruvic Transaminase	Protein Coding	41	GC08P144502	19.53	https://www.genecards.org/cgi-bin/carddisp.pl?gene=GPT	19p13.2	19:7112256-7294413	INSR, HHF5	Insulin receptor	147670	INSR	3643	ENSG00000171105,ENST00000302850.10	1 gene for alpha and beta subunits	Rabson-Mendenhall syndrome	262190	Autosomal recessive	3	Insr	CFH
																		MT-TS1	Mitochondrially Encoded TRNA-Ser (UCN) 1	RNA Gene	14	GCMTM007447	19.48	https://www.genecards.org/cgi-bin/carddisp.pl?gene=MT-TS1	19p13.2	19:7669048-7670454	RETN, RSTN, FIZZ3	Resistin	605565	RETN	56729	ENSG00000104918,ENST00000629642.1		{Diabetes mellitus, noninsulin-dependent, susceptibility to}	125853	Autosomal dominant	3	Retn	CFL1
																		CD4	CD4 Molecule	Protein Coding	49	GC12P006786	19.43	https://www.genecards.org/cgi-bin/carddisp.pl?gene=CD4	19p13.2	19:7669048-7670454	RETN, RSTN, FIZZ3	Resistin	605565	RETN	56729	ENSG00000104918,ENST00000629642.1		{Hypertension, insulin resistance-related, susceptibility to}	125853	Autosomal dominant	3	Retn	CFTR
																		BCS1L	BCS1 Homolog, Ubiquinol-Cytochrome C Reductase Complex Chaperone	Protein Coding	43	GC02P218658	19.41	https://www.genecards.org/cgi-bin/carddisp.pl?gene=BCS1L	19q13.2	19:40230316-40285530	AKT2, HIHGHH	AKT serine/threonine kinase 2	164731	AKT2	208	ENSG00000105221,ENST00000579047.5		Diabetes mellitus, type II	125853	Autosomal dominant	3	Akt2	CHGA
																		RBP4	Retinol Binding Protein 4	Protein Coding	44	GC10M093591	19.39	https://www.genecards.org/cgi-bin/carddisp.pl?gene=RBP4	19q13.2	19:40230316-40285530	AKT2, HIHGHH	AKT serine/threonine kinase 2	164731	AKT2	208	ENSG00000105221,ENST00000579047.5		Hypoinsulinemic hypoglycemia with hemihypertrophy	240900	Autosomal dominant	3	Akt2	CHIT1
																		VDR	Vitamin D Receptor	Protein Coding	51	GC12M047841	19.37	https://www.genecards.org/cgi-bin/carddisp.pl?gene=VDR	19q13.42	19:55151766-55157731	TNNI3, CMH7, CMD2A, RCM1, CMD1FF	Troponin-I, cardiac	191044	TNNI3	7137	ENSG00000129991,ENST00000344887.10	mutation identified in 1 CMD2A family	?Cardiomyopathy, dilated, 2A	611880	Autosomal recessive	3	Tnni3	CHKB
																		PFKM	Phosphofructokinase, Muscle	Protein Coding	50	GC12P048105	19.36	https://www.genecards.org/cgi-bin/carddisp.pl?gene=PFKM	19q13.42	19:55151766-55157731	TNNI3, CMH7, CMD2A, RCM1, CMD1FF	Troponin-I, cardiac	191044	TNNI3	7137	ENSG00000129991,ENST00000344887.10	mutation identified in 1 CMD2A family	Cardiomyopathy, dilated, 1FF	613286		3	Tnni3	CHRM2
																		CS	Citrate Synthase	Protein Coding	44	GC12M056271	19.31	https://www.genecards.org/cgi-bin/carddisp.pl?gene=CS	19q13.42	19:55151766-55157731	TNNI3, CMH7, CMD2A, RCM1, CMD1FF	Troponin-I, cardiac	191044	TNNI3	7137	ENSG00000129991,ENST00000344887.10	mutation identified in 1 CMD2A family	Cardiomyopathy, familial restrictive, 1	115210	Autosomal dominant	3	Tnni3	CIDEC
																		FTH1	Ferritin Heavy Chain 1	Protein Coding	50	GC11M061959	19.3	https://www.genecards.org/cgi-bin/carddisp.pl?gene=FTH1	19q13.42	19:55151766-55157731	TNNI3, CMH7, CMD2A, RCM1, CMD1FF	Troponin-I, cardiac	191044	TNNI3	7137	ENSG00000129991,ENST00000344887.10	mutation identified in 1 CMD2A family	Cardiomyopathy, hypertrophic, 7	613690	Autosomal dominant	3	Tnni3	CIITA
																		ETFDH	Electron Transfer Flavoprotein Dehydrogenase	Protein Coding	44	GC04P158672	19.26	https://www.genecards.org/cgi-bin/carddisp.pl?gene=ETFDH	20p13	20:3082555-3093520	AVP, AVRP, VP	Arginine vasopressin (neurophysin II, antidiuretic hormone)	192340	AVP	551	ENSG00000101200,ENST00000380293.3	distal 20p	Diabetes insipidus, neurohypophyseal	125700	Autosomal dominant	3	Avp	CIMT1
																		RYR1	Ryanodine Receptor 1	Protein Coding	47	GC19P038528	19.25	https://www.genecards.org/cgi-bin/carddisp.pl?gene=RYR1	20q11.21	20:31819355-31834683	MYLK2, MLCK	Myosin light chain kinase 2	606566	MYLK2	85366	ENSG00000101306,ENST00000375985.5		Cardiomyopathy, hypertrophic, 1, digenic	192600	Autosomal dominant; Digenic dominant	3	Mylk2	CISD1
																		MT-TW	Mitochondrially Encoded TRNA-Trp (UGA/G)	RNA Gene	12	GCMTP005514	19.24	https://www.genecards.org/cgi-bin/carddisp.pl?gene=MT-TW	20q12-q13.1	20:39000000-51200000	T2D3	Type 2 diabetes mellitus 3	603694		50982			{Type 2 diabetes mellitus 3}	603694		2		CISD2
																		PRKACA	Protein Kinase CAMP-Activated Catalytic Subunit Alpha	Protein Coding	51	GC19M014092	19.24	https://www.genecards.org/cgi-bin/carddisp.pl?gene=PRKACA	20q13.12	20:44106589-44187945	JPH2, JP2, CMH17	Junctophilin 2	605267	JPH2	57158	ENSG00000149596,ENST00000372980.3		Cardiomyopathy, hypertrophic, 17	613873	Autosomal dominant	3	Jph2	CISD3
																		MTO1	Mitochondrial TRNA Translation Optimization 1	Protein Coding	42	GC06P073461	19.22	https://www.genecards.org/cgi-bin/carddisp.pl?gene=MTO1	20q13.12	20:44355698-44434595	HNF4A, TCF14, MODY1, FRTS4	Hepatocyte nuclear factor 4, alpha (transcription factor-14)	600281	HNF4A	3172	ENSG00000101076,ENST00000316099.8		{Diabetes mellitus, noninsulin-dependent}	125853	Autosomal dominant	3	Hnf4a	CISH
																		H2AC18	H2A Clustered Histone 18	Protein Coding	26	GC01M149961	19.16	https://www.genecards.org/cgi-bin/carddisp.pl?gene=H2AC18	20q13.12	20:44355698-44434595	HNF4A, TCF14, MODY1, FRTS4	Hepatocyte nuclear factor 4, alpha (transcription factor-14)	600281	HNF4A	3172	ENSG00000101076,ENST00000316099.8		Fanconi renotubular syndrome 4, with maturity-onset diabetes of the young	616026	Autosomal dominant	3	Hnf4a	Ckb
																		IL12B	Interleukin 12B	Protein Coding	44	GC05M159314	19.15	https://www.genecards.org/cgi-bin/carddisp.pl?gene=IL12B	20q13.12	20:44355698-44434595	HNF4A, TCF14, MODY1, FRTS4	Hepatocyte nuclear factor 4, alpha (transcription factor-14)	600281	HNF4A	3172	ENSG00000101076,ENST00000316099.8		MODY, type I	125850	Autosomal dominant	3	Hnf4a	CKM
																		SOCS1	Suppressor Of Cytokine Signaling 1	Protein Coding	43	GC16M011255	19.06	https://www.genecards.org/cgi-bin/carddisp.pl?gene=SOCS1	Xp21.2-p21.1	X:31119218-33339459	DMD, BMD, CMD3B	Dystrophin	300377	DMD	1756	ENSG00000198947,ENST00000357033.8	dystrophin gene; cen-5'-3'-pter; 2Mb; ?Xp21.13	Becker muscular dystrophy	300376	X-linked recessive	3	Dmd	CKMT2
																		MT-TF	Mitochondrially Encoded TRNA-Phe (UUU/C)	RNA Gene	14	GCMTP000580	19.04	https://www.genecards.org/cgi-bin/carddisp.pl?gene=MT-TF	Xp21.2-p21.1	X:31119218-33339459	DMD, BMD, CMD3B	Dystrophin	300377	DMD	1756	ENSG00000198947,ENST00000357033.8	dystrophin gene; cen-5'-3'-pter; 2Mb; ?Xp21.13	Cardiomyopathy, dilated, 3B	302045	X-linked	3	Dmd	CLCN1
																		HBA1	Hemoglobin Subunit Alpha 1	Protein Coding	42	GC16P001370	19.02	https://www.genecards.org/cgi-bin/carddisp.pl?gene=HBA1	Xp21.2-p21.1	X:31119218-33339459	DMD, BMD, CMD3B	Dystrophin	300377	DMD	1756	ENSG00000198947,ENST00000357033.8	dystrophin gene; cen-5'-3'-pter; 2Mb; ?Xp21.13	Duchenne muscular dystrophy	310200	X-linked recessive	3	Dmd	CLCNKA
																		AGER	Advanced Glycosylation End-Product Specific Receptor	Protein Coding	44	GC06M032180	19.01	https://www.genecards.org/cgi-bin/carddisp.pl?gene=AGER	Xp11	X:37800000-61000000	IDDMX	Diabetes mellitus, insulin-dependent, X-linked, susceptibility to	300136		8245		only with DR3	{Diabetes mellitus, insulin-dependent, X-linked}	300136		2		CLCNKB
																		TSC1	TSC Complex Subunit 1	Protein Coding	48	GC09M132891	19	https://www.genecards.org/cgi-bin/carddisp.pl?gene=TSC1	Xq28	X:153902624-153907165	AVPR2, DIR, DI1, ADHR	Arginine vasopressin receptor-2	300538	AVPR2	554	ENSG00000126895,ENST00000646375.1		Diabetes insipidus, nephrogenic	304800	X-linked recessive	3	Avpr2	CLIP2
																		ACP1	Acid Phosphatase 1	Protein Coding	44	GC02P000254	18.95	https://www.genecards.org/cgi-bin/carddisp.pl?gene=ACP1	Xq28	X:153902624-153907165	AVPR2, DIR, DI1, ADHR	Arginine vasopressin receptor-2	300538	AVPR2	554	ENSG00000126895,ENST00000646375.1		Nephrogenic syndrome of inappropriate antidiuresis	300539	X-linked recessive	3	Avpr2	CLN3
																		TGFB2	Transforming Growth Factor Beta 2	Protein Coding	50	GC01P218345	18.93	https://www.genecards.org/cgi-bin/carddisp.pl?gene=TGFB2															CLP
																		PMM2	Phosphomannomutase 2	Protein Coding	47	GC16P008788	18.88	https://www.genecards.org/cgi-bin/carddisp.pl?gene=PMM2															CLPX
																		ACTB	Actin Beta	Protein Coding	49	GC07M005527	18.81	https://www.genecards.org/cgi-bin/carddisp.pl?gene=ACTB															CLRN1
																		HSPD1	Heat Shock Protein Family D (Hsp60) Member 1	Protein Coding	47	GC02M197486	18.79	https://www.genecards.org/cgi-bin/carddisp.pl?gene=HSPD1	Phenotype Mapping Key														CLU
																		TSC2	TSC Complex Subunit 2	Protein Coding	50	GC16P002436	18.76	https://www.genecards.org/cgi-bin/carddisp.pl?gene=TSC2	1 - The disorder is placed on the map due to its association with a gene, but the underlying defect is not known.														CMD1A
																		MRPL44	Mitochondrial Ribosomal Protein L44	Protein Coding	39	GC02P223957	18.7	https://www.genecards.org/cgi-bin/carddisp.pl?gene=MRPL44	2 - The disorder was placed on the map by statistical methods.														CMD1AA
																		MT-TQ	Mitochondrially Encoded TRNA-Gln (CAA/G)	RNA Gene	12	GCMTM004331	18.69	https://www.genecards.org/cgi-bin/carddisp.pl?gene=MT-TQ	3 - The molecular basis of the disorder is known.														CMD1B
																		APLN	Apelin	Protein Coding	37	GC0XM129645	18.69	https://www.genecards.org/cgi-bin/carddisp.pl?gene=APLN	4 - A contiguous gene duplication or deletion syndrome in which multiple genes are involved.														CMD1BB
																		CASP8	Caspase 8	Protein Coding	52	GC02P201233	18.68	https://www.genecards.org/cgi-bin/carddisp.pl?gene=CASP8															CMD1C
																		MAPK3	Mitogen-Activated Protein Kinase 3	Protein Coding	49	GC16M030117	18.67	https://www.genecards.org/cgi-bin/carddisp.pl?gene=MAPK3															CMD1CC
																		MAPK8	Mitogen-Activated Protein Kinase 8	Protein Coding	50	GC10P048306	18.63	https://www.genecards.org/cgi-bin/carddisp.pl?gene=MAPK8															CMD1D
																		CACNA1D	Calcium Voltage-Gated Channel Subunit Alpha1 D	Protein Coding	47	GC03P053328	18.6	https://www.genecards.org/cgi-bin/carddisp.pl?gene=CACNA1D															CMD1DD
																		BBS1	Bardet-Biedl Syndrome 1	Protein Coding	38	GC11P066499	18.58	https://www.genecards.org/cgi-bin/carddisp.pl?gene=BBS1															CMD1E
																		GGT1	Gamma-Glutamyltransferase 1	Protein Coding	46	GC22P024927	18.58	https://www.genecards.org/cgi-bin/carddisp.pl?gene=GGT1															CMD1EE
																		PRL	Prolactin	Protein Coding	44	GC06M022230	18.54	https://www.genecards.org/cgi-bin/carddisp.pl?gene=PRL															CMD1F
																		COX6B1	Cytochrome C Oxidase Subunit 6B1	Protein Coding	43	GC19P038224	18.38	https://www.genecards.org/cgi-bin/carddisp.pl?gene=COX6B1															CMD1FF
																		TPM3	Tropomyosin 3	Protein Coding	47	GC01M154127	18.33	https://www.genecards.org/cgi-bin/carddisp.pl?gene=TPM3															CMD1G
																		OPA1	OPA1 Mitochondrial Dynamin Like GTPase	Protein Coding	44	GC03P193594	18.29	https://www.genecards.org/cgi-bin/carddisp.pl?gene=OPA1															CMD1GG
																		RHO	Rhodopsin	Protein Coding	47	GC03P130619	18.28	https://www.genecards.org/cgi-bin/carddisp.pl?gene=RHO															CMD1H
																		NR3C2	Nuclear Receptor Subfamily 3 Group C Member 2	Protein Coding	48	GC04M148078	18.27	https://www.genecards.org/cgi-bin/carddisp.pl?gene=NR3C2															CMD1I
																		CST3	Cystatin C	Protein Coding	44	GC20M023608	18.26	https://www.genecards.org/cgi-bin/carddisp.pl?gene=CST3															CMD1II
																		NDUFAF1	NADH:Ubiquinone Oxidoreductase Complex Assembly Factor 1	Protein Coding	41	GC15M041387	18.26	https://www.genecards.org/cgi-bin/carddisp.pl?gene=NDUFAF1															CMD1J
																		FAS	Fas Cell Surface Death Receptor	Protein Coding	50	GC10P088969	18.21	https://www.genecards.org/cgi-bin/carddisp.pl?gene=FAS															CMD1JJ
																		KCNJ5	Potassium Inwardly Rectifying Channel Subfamily J Member 5	Protein Coding	47	GC11P128891	18.19	https://www.genecards.org/cgi-bin/carddisp.pl?gene=KCNJ5															CMD1K
																		CRYAA	Crystallin Alpha A	Protein Coding	44	GC21P043169	18.18	https://www.genecards.org/cgi-bin/carddisp.pl?gene=CRYAA															CMD1L
																		BGLAP	Bone Gamma-Carboxyglutamate Protein	Protein Coding	40	GC01P156242	18.13	https://www.genecards.org/cgi-bin/carddisp.pl?gene=BGLAP															CMD1LL
																		TLR2	Toll Like Receptor 2	Protein Coding	51	GC04P153684	18.13	https://www.genecards.org/cgi-bin/carddisp.pl?gene=TLR2															CMD1M
																		SLC12A3	Solute Carrier Family 12 Member 3	Protein Coding	47	GC16P056865	18.05	https://www.genecards.org/cgi-bin/carddisp.pl?gene=SLC12A3															CMD1MM
																		GATA5	GATA Binding Protein 5	Protein Coding	39	GC20M062464	18.05	https://www.genecards.org/cgi-bin/carddisp.pl?gene=GATA5															CMD1NN
																		TTPA	Alpha Tocopherol Transfer Protein	Protein Coding	41	GC08M063048	18.03	https://www.genecards.org/cgi-bin/carddisp.pl?gene=TTPA															CMD1O
																		XRCC4	X-Ray Repair Cross Complementing 4	Protein Coding	43	GC05P083077	18.03	https://www.genecards.org/cgi-bin/carddisp.pl?gene=XRCC4															CMD1P
																		PRKAA2	Protein Kinase AMP-Activated Catalytic Subunit Alpha 2	Protein Coding	50	GC01P056645	17.99	https://www.genecards.org/cgi-bin/carddisp.pl?gene=PRKAA2															CMD1Q
																		MTHFR	Methylenetetrahydrofolate Reductase	Protein Coding	47	GC01M011785	17.98	https://www.genecards.org/cgi-bin/carddisp.pl?gene=MTHFR															CMD1R
																		HADHB	Hydroxyacyl-CoA Dehydrogenase Trifunctional Multienzyme Complex Subunit Beta	Protein Coding	47	GC02P026243	17.91	https://www.genecards.org/cgi-bin/carddisp.pl?gene=HADHB															CMD1S
																		TMEM126B	Transmembrane Protein 126B	Protein Coding	39	GC11P085628	17.89	https://www.genecards.org/cgi-bin/carddisp.pl?gene=TMEM126B															CMD1V
																		PLA2G7	Phospholipase A2 Group VII	Protein Coding	50	GC06M046704	17.85	https://www.genecards.org/cgi-bin/carddisp.pl?gene=PLA2G7															CMD1W
																		SELE	Selectin E	Protein Coding	44	GC01M169722	17.82	https://www.genecards.org/cgi-bin/carddisp.pl?gene=SELE															CMD1X
																		HLA-A	Major Histocompatibility Complex, Class I, A	Protein Coding	46	GC06P047265	17.77	https://www.genecards.org/cgi-bin/carddisp.pl?gene=HLA-A															CMD1Y
																		SLC19A3	Solute Carrier Family 19 Member 3	Protein Coding	46	GC02M227685	17.73	https://www.genecards.org/cgi-bin/carddisp.pl?gene=SLC19A3															CMD1Z
																		SI	Sucrase-Isomaltase	Protein Coding	43	GC03M164978	17.72	https://www.genecards.org/cgi-bin/carddisp.pl?gene=SI															CMD2A
																		CLCNKB	Chloride Voltage-Gated Channel Kb	Protein Coding	44	GC01P016043	17.69	https://www.genecards.org/cgi-bin/carddisp.pl?gene=CLCNKB															CMD2B
																		MB	Myoglobin	Protein Coding	43	GC22M035606	17.67	https://www.genecards.org/cgi-bin/carddisp.pl?gene=MB															CMD2C
																		ESR1	Estrogen Receptor 1	Protein Coding	53	GC06P151656	17.64	https://www.genecards.org/cgi-bin/carddisp.pl?gene=ESR1															CMD3B
																		NPY	Neuropeptide Y	Protein Coding	45	GC07P024290	17.64	https://www.genecards.org/cgi-bin/carddisp.pl?gene=NPY															CMH1
																		IGF2R	Insulin Like Growth Factor 2 Receptor	Protein Coding	45	GC06P159969	17.63	https://www.genecards.org/cgi-bin/carddisp.pl?gene=IGF2R															CMH10
																		LTA	Lymphotoxin Alpha	Protein Coding	42	GC06P047303	17.61	https://www.genecards.org/cgi-bin/carddisp.pl?gene=LTA															CMH11
																		PDCD1	Programmed Cell Death 1	Protein Coding	48	GC02M241849	17.6	https://www.genecards.org/cgi-bin/carddisp.pl?gene=PDCD1															CMH12
																		FHL2	Four And A Half LIM Domains 2	Protein Coding	45	GC02M105343	17.59	https://www.genecards.org/cgi-bin/carddisp.pl?gene=FHL2															CMH13
																		NDUFB8	NADH:Ubiquinone Oxidoreductase Subunit B8	Protein Coding	43	GC10M100523	17.51	https://www.genecards.org/cgi-bin/carddisp.pl?gene=NDUFB8															CMH14
																		ADM	Adrenomedullin	Protein Coding	44	GC11P010304	17.5	https://www.genecards.org/cgi-bin/carddisp.pl?gene=ADM															CMH15
																		ISL1	ISL LIM Homeobox 1	Protein Coding	45	GC05P051383	17.5	https://www.genecards.org/cgi-bin/carddisp.pl?gene=ISL1															CMH16
																		NF1	Neurofibromin 1	Protein Coding	48	GC17P031094	17.49	https://www.genecards.org/cgi-bin/carddisp.pl?gene=NF1															CMH17
																		MIR155	MicroRNA 155	RNA Gene	18	GC21P025573	17.46	https://www.genecards.org/cgi-bin/carddisp.pl?gene=MIR155															CMH18
																		AGL	Amylo-Alpha-1, 6-Glucosidase, 4-Alpha-Glucanotransferase	Protein Coding	45	GC01P099850	17.43	https://www.genecards.org/cgi-bin/carddisp.pl?gene=AGL															CMH2
																		TRPM4	Transient Receptor Potential Cation Channel Subfamily M Member 4	Protein Coding	45	GC19P049157	17.43	https://www.genecards.org/cgi-bin/carddisp.pl?gene=TRPM4															CMH20
																		MYBPC1	Myosin Binding Protein C1	Protein Coding	43	GC12P101568	17.42	https://www.genecards.org/cgi-bin/carddisp.pl?gene=MYBPC1															CMH21
																		AKR1B1	Aldo-Keto Reductase Family 1 Member B	Protein Coding	47	GC07M134442	17.38	https://www.genecards.org/cgi-bin/carddisp.pl?gene=AKR1B1															CMH22
																		NDUFB3	NADH:Ubiquinone Oxidoreductase Subunit B3	Protein Coding	42	GC02P201071	17.34	https://www.genecards.org/cgi-bin/carddisp.pl?gene=NDUFB3															CMH23
																		PGF	Placental Growth Factor	Protein Coding	43	GC14M074941	17.34	https://www.genecards.org/cgi-bin/carddisp.pl?gene=PGF															CMH24
																		SLC2A1	Solute Carrier Family 2 Member 1	Protein Coding	52	GC01M042925	17.3	https://www.genecards.org/cgi-bin/carddisp.pl?gene=SLC2A1															CMH25
																		MIPEP	Mitochondrial Intermediate Peptidase	Protein Coding	42	GC13M023730	17.25	https://www.genecards.org/cgi-bin/carddisp.pl?gene=MIPEP															CMH26
																		CCN2	Cellular Communication Network Factor 2	Protein Coding	39	GC06M131948	17.23	https://www.genecards.org/cgi-bin/carddisp.pl?gene=CCN2															CMH27
																		TBX20	T-Box Transcription Factor 20	Protein Coding	41	GC07M035237	17.17	https://www.genecards.org/cgi-bin/carddisp.pl?gene=TBX20															CMH3
																		CEP290	Centrosomal Protein 290	Protein Coding	40	GC12M088049	17.11	https://www.genecards.org/cgi-bin/carddisp.pl?gene=CEP290															CMH4
																		BRCA2	BRCA2 DNA Repair Associated	Protein Coding	49	GC13P032315	17.1	https://www.genecards.org/cgi-bin/carddisp.pl?gene=BRCA2															CMH6
																		NUBPL	Nucleotide Binding Protein Like	Protein Coding	39	GC14P031489	17.06	https://www.genecards.org/cgi-bin/carddisp.pl?gene=NUBPL															CMH7
																		HAND2	Heart And Neural Crest Derivatives Expressed 2	Protein Coding	43	GC04M173524	17.01	https://www.genecards.org/cgi-bin/carddisp.pl?gene=HAND2															CMH8
																		HIF1A	Hypoxia Inducible Factor 1 Subunit Alpha	Protein Coding	47	GC14P061695	16.95	https://www.genecards.org/cgi-bin/carddisp.pl?gene=HIF1A															CMKBR5
																		ADRB1	Adrenoceptor Beta 1	Protein Coding	48	GC10P114044	16.93	https://www.genecards.org/cgi-bin/carddisp.pl?gene=ADRB1															CMPD1
																		NDUFAF3	NADH:Ubiquinone Oxidoreductase Complex Assembly Factor 3	Protein Coding	40	GC03P049020	16.9	https://www.genecards.org/cgi-bin/carddisp.pl?gene=NDUFAF3															CMYA1
																		CASP1	Caspase 1	Protein Coding	50	GC11M105025	16.88	https://www.genecards.org/cgi-bin/carddisp.pl?gene=CASP1															CMYA3
																		NDUFS1	NADH:Ubiquinone Oxidoreductase Core Subunit S1	Protein Coding	45	GC02M206114	16.88	https://www.genecards.org/cgi-bin/carddisp.pl?gene=NDUFS1															CMYA5
																		CFTR	CF Transmembrane Conductance Regulator	Protein Coding	51	GC07P117287	16.88	https://www.genecards.org/cgi-bin/carddisp.pl?gene=CFTR															CNBP
																		CYCS	Cytochrome C, Somatic	Protein Coding	48	GC07M025118	16.74	https://www.genecards.org/cgi-bin/carddisp.pl?gene=CYCS															CNGA1
																		TLR8	Toll Like Receptor 8	Protein Coding	47	GC0XP012924	16.73	https://www.genecards.org/cgi-bin/carddisp.pl?gene=TLR8															CNGB1
																		BBS4	Bardet-Biedl Syndrome 4	Protein Coding	41	GC15P072686	16.71	https://www.genecards.org/cgi-bin/carddisp.pl?gene=BBS4															CNNM4
																		SDHD	Succinate Dehydrogenase Complex Subunit D	Protein Coding	44	GC11P112087	16.67	https://www.genecards.org/cgi-bin/carddisp.pl?gene=SDHD															CNR1
																		BBS12	Bardet-Biedl Syndrome 12	Protein Coding	35	GC04P122702	16.66	https://www.genecards.org/cgi-bin/carddisp.pl?gene=BBS12															COA3
																		SELP	Selectin P	Protein Coding	45	GC01M169558	16.65	https://www.genecards.org/cgi-bin/carddisp.pl?gene=SELP															COG2
																		DLK1	Delta Like Non-Canonical Notch Ligand 1	Protein Coding	44	GC14P104663	16.63	https://www.genecards.org/cgi-bin/carddisp.pl?gene=DLK1															COL17A1
																		LCN2	Lipocalin 2	Protein Coding	43	GC09P128149	16.63	https://www.genecards.org/cgi-bin/carddisp.pl?gene=LCN2															COL1A1
																		NDUFS4	NADH:Ubiquinone Oxidoreductase Subunit S4	Protein Coding	44	GC05P053560	16.58	https://www.genecards.org/cgi-bin/carddisp.pl?gene=NDUFS4															COL1A2
																		BBS10	Bardet-Biedl Syndrome 10	Protein Coding	40	GC12M076344	16.58	https://www.genecards.org/cgi-bin/carddisp.pl?gene=BBS10															COL3A1
																		MGAM	Maltase-Glucoamylase	Protein Coding	41	GC07P145052	16.57	https://www.genecards.org/cgi-bin/carddisp.pl?gene=MGAM															COL7A1
																		SLC5A2	Solute Carrier Family 5 Member 2	Protein Coding	47	GC16P031580	16.55	https://www.genecards.org/cgi-bin/carddisp.pl?gene=SLC5A2															COLED
																		CD8A	CD8a Molecule	Protein Coding	46	GC02M086784	16.53	https://www.genecards.org/cgi-bin/carddisp.pl?gene=CD8A															COMT
																		PKD2	Polycystin 2, Transient Receptor Potential Cation Channel	Protein Coding	46	GC04P088007	16.49	https://www.genecards.org/cgi-bin/carddisp.pl?gene=PKD2															COQ2
																		DYSF	Dysferlin	Protein Coding	43	GC02P071453	16.48	https://www.genecards.org/cgi-bin/carddisp.pl?gene=DYSF															COQ4
																		GNB3	G Protein Subunit Beta 3	Protein Coding	47	GC12P006839	16.46	https://www.genecards.org/cgi-bin/carddisp.pl?gene=GNB3															COQ6
																		BBS7	Bardet-Biedl Syndrome 7	Protein Coding	38	GC04M121824	16.42	https://www.genecards.org/cgi-bin/carddisp.pl?gene=BBS7															COQ8A
																		POMGNT1	Protein O-Linked Mannose N-Acetylglucosaminyltransferase 1 (Beta 1,2-)	Protein Coding	45	GC01M046188	16.4	https://www.genecards.org/cgi-bin/carddisp.pl?gene=POMGNT1															COQ9
																		MTOR	Mechanistic Target Of Rapamycin Kinase	Protein Coding	54	GC01M011106	16.39	https://www.genecards.org/cgi-bin/carddisp.pl?gene=MTOR															COX10
																		TFAM	Transcription Factor A, Mitochondrial	Protein Coding	43	GC10P058385	16.39	https://www.genecards.org/cgi-bin/carddisp.pl?gene=TFAM															COX15
																		CD36	CD36 Molecule	Protein Coding	48	GC07P080369	16.36	https://www.genecards.org/cgi-bin/carddisp.pl?gene=CD36															COX4I1
																		BRCA1	BRCA1 DNA Repair Associated	Protein Coding	50	GC17M043044	16.34	https://www.genecards.org/cgi-bin/carddisp.pl?gene=BRCA1															COX5A
																		CXCL10	C-X-C Motif Chemokine Ligand 10	Protein Coding	44	GC04M076021	16.3	https://www.genecards.org/cgi-bin/carddisp.pl?gene=CXCL10															COX6B1
																		SPP1	Secreted Phosphoprotein 1	Protein Coding	46	GC04P087975	16.28	https://www.genecards.org/cgi-bin/carddisp.pl?gene=SPP1															COX8A
																		ACTA1	Actin Alpha 1, Skeletal Muscle	Protein Coding	47	GC01M229431	16.28	https://www.genecards.org/cgi-bin/carddisp.pl?gene=ACTA1															CP
																		MIR199A1	MicroRNA 199a-1	RNA Gene	18	GC19M010792	16.28	https://www.genecards.org/cgi-bin/carddisp.pl?gene=MIR199A1															CPOX
																		IL13	Interleukin 13	Protein Coding	44	GC05P132656	16.26	https://www.genecards.org/cgi-bin/carddisp.pl?gene=IL13															CPT1A
																		FBN1	Fibrillin 1	Protein Coding	45	GC15M048408	16.25	https://www.genecards.org/cgi-bin/carddisp.pl?gene=FBN1															CPT1B
																		SIRT1	Sirtuin 1	Protein Coding	49	GC10P067884	16.25	https://www.genecards.org/cgi-bin/carddisp.pl?gene=SIRT1															CPT2
																		EPG5	Ectopic P-Granules Autophagy Protein 5 Homolog	Protein Coding	36	GC18M045800	16.24	https://www.genecards.org/cgi-bin/carddisp.pl?gene=EPG5															CRAF
																		SQSTM1	Sequestosome 1	Protein Coding	48	GC05P179806	16.2	https://www.genecards.org/cgi-bin/carddisp.pl?gene=SQSTM1															CRAT
																		TLR9	Toll Like Receptor 9	Protein Coding	45	GC03M052222	16.16	https://www.genecards.org/cgi-bin/carddisp.pl?gene=TLR9															CRB1
																		HP	Haptoglobin	Protein Coding	44	GC16P072089	16.09	https://www.genecards.org/cgi-bin/carddisp.pl?gene=HP															CREB1
																		CDKN1C	Cyclin Dependent Kinase Inhibitor 1C	Protein Coding	47	GC11M002887	16.07	https://www.genecards.org/cgi-bin/carddisp.pl?gene=CDKN1C															CREBBP
																		MT-TI	Mitochondrially Encoded TRNA-Ile (AUU/C)	RNA Gene	13	GCMTP004265	16.06	https://www.genecards.org/cgi-bin/carddisp.pl?gene=MT-TI															CRH
																		CD86	CD86 Molecule	Protein Coding	43	GC03P122055	16.06	https://www.genecards.org/cgi-bin/carddisp.pl?gene=CD86															CRK
																		HMGCR	3-Hydroxy-3-Methylglutaryl-CoA Reductase	Protein Coding	45	GC05P075336	16.01	https://www.genecards.org/cgi-bin/carddisp.pl?gene=HMGCR															CROCC
																		SAG	S-Antigen Visual Arrestin	Protein Coding	44	GC02P233311	15.97	https://www.genecards.org/cgi-bin/carddisp.pl?gene=SAG															CRP
																		GLP1R	Glucagon Like Peptide 1 Receptor	Protein Coding	46	GC06P039048	15.94	https://www.genecards.org/cgi-bin/carddisp.pl?gene=GLP1R															CRP3
																		NDUFV1	NADH:Ubiquinone Oxidoreductase Core Subunit V1	Protein Coding	45	GC11P067632	15.89	https://www.genecards.org/cgi-bin/carddisp.pl?gene=NDUFV1															CRX
																		BDNF	Brain Derived Neurotrophic Factor	Protein Coding	47	GC11M027654	15.86	https://www.genecards.org/cgi-bin/carddisp.pl?gene=BDNF															CRYA2
																		PTPRC	Protein Tyrosine Phosphatase Receptor Type C	Protein Coding	51	GC01P198607	15.86	https://www.genecards.org/cgi-bin/carddisp.pl?gene=PTPRC															CRYAA
																		CNR1	Cannabinoid Receptor 1	Protein Coding	46	GC06M088139	15.86	https://www.genecards.org/cgi-bin/carddisp.pl?gene=CNR1															CRYAB
																		UCP1	Uncoupling Protein 1	Protein Coding	44	GC04M140559	15.85	https://www.genecards.org/cgi-bin/carddisp.pl?gene=UCP1															CS
																		SETX	Senataxin	Protein Coding	41	GC09M132261	15.82	https://www.genecards.org/cgi-bin/carddisp.pl?gene=SETX															CSF1
																		GSR	Glutathione-Disulfide Reductase	Protein Coding	48	GC08M030678	15.81	https://www.genecards.org/cgi-bin/carddisp.pl?gene=GSR															CSF2
																		CREB1	CAMP Responsive Element Binding Protein 1	Protein Coding	48	GC02P207529	15.78	https://www.genecards.org/cgi-bin/carddisp.pl?gene=CREB1															CSF3
																		KNG1	Kininogen 1	Protein Coding	44	GC03P186717	15.76	https://www.genecards.org/cgi-bin/carddisp.pl?gene=KNG1															CSH2
																		TPO	Thyroid Peroxidase	Protein Coding	48	GC02P001374	15.74	https://www.genecards.org/cgi-bin/carddisp.pl?gene=TPO															CSRP3
																		KCNQ1OT1	KCNQ1 Opposite Strand/Antisense Transcript 1	RNA Gene	25	GC11M002661	15.73	https://www.genecards.org/cgi-bin/carddisp.pl?gene=KCNQ1OT1															CST3
																		MIR34A	MicroRNA 34a	RNA Gene	22	GC01M009151	15.72	https://www.genecards.org/cgi-bin/carddisp.pl?gene=MIR34A															CTCF
																		FABP3	Fatty Acid Binding Protein 3	Protein Coding	44	GC01M031365	15.71	https://www.genecards.org/cgi-bin/carddisp.pl?gene=FABP3															CTF1
																		AIP	Aryl Hydrocarbon Receptor Interacting Protein	Protein Coding	44	GC11P067468	15.64	https://www.genecards.org/cgi-bin/carddisp.pl?gene=AIP															CTH
																		ADCY10	Adenylate Cyclase 10	Protein Coding	45	GC01M167809	15.61	https://www.genecards.org/cgi-bin/carddisp.pl?gene=ADCY10															CTLA4
																		MIR126	MicroRNA 126	RNA Gene	22	GC09P136670	15.59	https://www.genecards.org/cgi-bin/carddisp.pl?gene=MIR126															CTNNA1
																		IGFBP2	Insulin Like Growth Factor Binding Protein 2	Protein Coding	43	GC02P216632	15.59	https://www.genecards.org/cgi-bin/carddisp.pl?gene=IGFBP2															CTNNA3
																		RRM2B	Ribonucleotide Reductase Regulatory TP53 Inducible Subunit M2B	Protein Coding	49	GC08M102204	15.59	https://www.genecards.org/cgi-bin/carddisp.pl?gene=RRM2B															CTNNB1
																		JUN	Jun Proto-Oncogene, AP-1 Transcription Factor Subunit	Protein Coding	49	GC01M058780	15.53	https://www.genecards.org/cgi-bin/carddisp.pl?gene=JUN															CTNND1
																		TIMP1	TIMP Metallopeptidase Inhibitor 1	Protein Coding	45	GC0XP047583	15.48	https://www.genecards.org/cgi-bin/carddisp.pl?gene=TIMP1															CTPP2
																		SLC27A1	Solute Carrier Family 27 Member 1	Protein Coding	41	GC19P023305	15.45	https://www.genecards.org/cgi-bin/carddisp.pl?gene=SLC27A1															CTRCT16
																		ICOSLG	Inducible T Cell Costimulator Ligand	Protein Coding	39	GC21M044222	15.41	https://www.genecards.org/cgi-bin/carddisp.pl?gene=ICOSLG															CTRCT41
																		COQ9	Coenzyme Q9	Protein Coding	41	GC16P057447	15.41	https://www.genecards.org/cgi-bin/carddisp.pl?gene=COQ9															CTSB
																		BBS5	Bardet-Biedl Syndrome 5	Protein Coding	39	GC02P169480	15.38	https://www.genecards.org/cgi-bin/carddisp.pl?gene=BBS5															CTSD
																		SNRPN	Small Nuclear Ribonucleoprotein Polypeptide N	Protein Coding	44	GC15P024823	15.36	https://www.genecards.org/cgi-bin/carddisp.pl?gene=SNRPN															CTSL
																		FOXRED1	FAD Dependent Oxidoreductase Domain Containing 1	Protein Coding	40	GC11P126269	15.35	https://www.genecards.org/cgi-bin/carddisp.pl?gene=FOXRED1															CXADR
																		FOXO1	Forkhead Box O1	Protein Coding	48	GC13M040555	15.34	https://www.genecards.org/cgi-bin/carddisp.pl?gene=FOXO1															CXCL10
																		CCR6	C-C Motif Chemokine Receptor 6	Protein Coding	44	GC06P167111	15.33	https://www.genecards.org/cgi-bin/carddisp.pl?gene=CCR6															CXCL12
																		MIR223	MicroRNA 223	RNA Gene	21	GC0XP066018	15.32	https://www.genecards.org/cgi-bin/carddisp.pl?gene=MIR223															CXCL8
																		CACNA1A	Calcium Voltage-Gated Channel Subunit Alpha1 A	Protein Coding	47	GC19M013206	15.3	https://www.genecards.org/cgi-bin/carddisp.pl?gene=CACNA1A															CXCR4
																		MMP3	Matrix Metallopeptidase 3	Protein Coding	51	GC11M102835	15.27	https://www.genecards.org/cgi-bin/carddisp.pl?gene=MMP3															CYBB
																		HGF	Hepatocyte Growth Factor	Protein Coding	52	GC07M081699	15.25	https://www.genecards.org/cgi-bin/carddisp.pl?gene=HGF															CYBRD1
																		MT-TT	Mitochondrially Encoded TRNA-Thr (ACN)	RNA Gene	15	GCMTP015890	15.22	https://www.genecards.org/cgi-bin/carddisp.pl?gene=MT-TT															CYCS
																		RPGR	Retinitis Pigmentosa GTPase Regulator	Protein Coding	40	GC0XM038269	15.19	https://www.genecards.org/cgi-bin/carddisp.pl?gene=RPGR															CYP11A1
																		CYP2E1	Cytochrome P450 Family 2 Subfamily E Member 1	Protein Coding	45	GC10P133520	15.18	https://www.genecards.org/cgi-bin/carddisp.pl?gene=CYP2E1															CYP11B2
																		NPHP1	Nephrocystin 1	Protein Coding	43	GC02M110122	15.13	https://www.genecards.org/cgi-bin/carddisp.pl?gene=NPHP1															CYP17A1
																		FABP4	Fatty Acid Binding Protein 4	Protein Coding	44	GC08M081478	15.12	https://www.genecards.org/cgi-bin/carddisp.pl?gene=FABP4															CYP19A1
																		XBP1	X-Box Binding Protein 1	Protein Coding	45	GC22M028794	15.07	https://www.genecards.org/cgi-bin/carddisp.pl?gene=XBP1															CYP21A2
																		PRDM10	PR/SET Domain 10	Protein Coding	34	GC11M129899	15.07	https://www.genecards.org/cgi-bin/carddisp.pl?gene=PRDM10															Cyp26b1
																		MTM1	Myotubularin 1	Protein Coding	44	GC0XP150562	15.05	https://www.genecards.org/cgi-bin/carddisp.pl?gene=MTM1															CYP27B1
																		ILK	Integrin Linked Kinase	Protein Coding	46	GC11P006581	15.04	https://www.genecards.org/cgi-bin/carddisp.pl?gene=ILK															CYP2B6
																		C4A	Complement C4A (Rodgers Blood Group)	Protein Coding	42	GC06P047332	15.02	https://www.genecards.org/cgi-bin/carddisp.pl?gene=C4A															CYP2D6
																		MYO6	Myosin VI	Protein Coding	45	GC06P075749	15.01	https://www.genecards.org/cgi-bin/carddisp.pl?gene=MYO6															CYP2E1
																		PDGFRA	Platelet Derived Growth Factor Receptor Alpha	Protein Coding	55	GC04P054229	14.98	https://www.genecards.org/cgi-bin/carddisp.pl?gene=PDGFRA															CYP2J2
																		MIR27A	MicroRNA 27a	RNA Gene	22	GC19M014010	14.93	https://www.genecards.org/cgi-bin/carddisp.pl?gene=MIR27A															CYP3A4
																		CTNNA3	Catenin Alpha 3	Protein Coding	39	GC10M065912	14.92	https://www.genecards.org/cgi-bin/carddisp.pl?gene=CTNNA3															CYPHER
																		KDM4C	Lysine Demethylase 4C	Protein Coding	40	GC09P006720	14.9	https://www.genecards.org/cgi-bin/carddisp.pl?gene=KDM4C															DAG1
																		SELL	Selectin L	Protein Coding	42	GC01M169690	14.89	https://www.genecards.org/cgi-bin/carddisp.pl?gene=SELL															DAPK2
																		GPX1	Glutathione Peroxidase 1	Protein Coding	48	GC03M049368	14.88	https://www.genecards.org/cgi-bin/carddisp.pl?gene=GPX1															DARS2
																		HRC	Histidine Rich Calcium Binding Protein	Protein Coding	36	GC19M049151	14.87	https://www.genecards.org/cgi-bin/carddisp.pl?gene=HRC															DBAL
																		MIR195	MicroRNA 195	RNA Gene	19	GC17M007018	14.87	https://www.genecards.org/cgi-bin/carddisp.pl?gene=MIR195															DCAF8
																		MLYCD	Malonyl-CoA Decarboxylase	Protein Coding	43	GC16P083899	14.86	https://www.genecards.org/cgi-bin/carddisp.pl?gene=MLYCD															DCN
																		MIR30E	MicroRNA 30e	RNA Gene	21	GC01P040754	14.85	https://www.genecards.org/cgi-bin/carddisp.pl?gene=MIR30E															DCP1
																		DRD2	Dopamine Receptor D2	Protein Coding	50	GC11M113409	14.84	https://www.genecards.org/cgi-bin/carddisp.pl?gene=DRD2															DCTN1
																		MT-TV	Mitochondrially Encoded TRNA-Val (GUN)	RNA Gene	14	GCMTP001605	14.82	https://www.genecards.org/cgi-bin/carddisp.pl?gene=MT-TV															DCWHKTA
																		COX5A	Cytochrome C Oxidase Subunit 5A	Protein Coding	43	GC15M074919	14.81	https://www.genecards.org/cgi-bin/carddisp.pl?gene=COX5A															DDAH1
																		SHBG	Sex Hormone Binding Globulin	Protein Coding	40	GC17P007613	14.8	https://www.genecards.org/cgi-bin/carddisp.pl?gene=SHBG															DDAH2
																		SLC17A5	Solute Carrier Family 17 Member 5	Protein Coding	44	GC06M073593	14.74	https://www.genecards.org/cgi-bin/carddisp.pl?gene=SLC17A5															Ddc
																		PRKAA1	Protein Kinase AMP-Activated Catalytic Subunit Alpha 1	Protein Coding	47	GC05M040759	14.73	https://www.genecards.org/cgi-bin/carddisp.pl?gene=PRKAA1															DDIT3
																		DLL1	Delta Like Canonical Notch Ligand 1	Protein Coding	45	GC06M170282	14.72	https://www.genecards.org/cgi-bin/carddisp.pl?gene=DLL1															DDX3X
																		SARDH	Sarcosine Dehydrogenase	Protein Coding	42	GC09M133663	14.72	https://www.genecards.org/cgi-bin/carddisp.pl?gene=SARDH															DDX41
																		PIK3C2A	Phosphatidylinositol-4-Phosphate 3-Kinase Catalytic Subunit Type 2 Alpha	Protein Coding	47	GC11M017191	14.71	https://www.genecards.org/cgi-bin/carddisp.pl?gene=PIK3C2A															DDX58
																		KCNJ8	Potassium Inwardly Rectifying Channel Subfamily J Member 8	Protein Coding	43	GC12M021764	14.71	https://www.genecards.org/cgi-bin/carddisp.pl?gene=KCNJ8															DECR1
																		MYOT	Myotilin	Protein Coding	41	GC05P137867	14.7	https://www.genecards.org/cgi-bin/carddisp.pl?gene=MYOT															DES
																		ALDH2	Aldehyde Dehydrogenase 2 Family Member	Protein Coding	50	GC12P111766	14.69	https://www.genecards.org/cgi-bin/carddisp.pl?gene=ALDH2															DFNA10
																		NDUFS3	NADH:Ubiquinone Oxidoreductase Core Subunit S3	Protein Coding	46	GC11P047567	14.68	https://www.genecards.org/cgi-bin/carddisp.pl?gene=NDUFS3															DFNA14
																		MYBPC2	Myosin Binding Protein C2	Protein Coding	39	GC19P050432	14.66	https://www.genecards.org/cgi-bin/carddisp.pl?gene=MYBPC2															DFNA22
																		SREBF1	Sterol Regulatory Element Binding Transcription Factor 1	Protein Coding	44	GC17M017810	14.64	https://www.genecards.org/cgi-bin/carddisp.pl?gene=SREBF1															DFNA38
																		FGF2	Fibroblast Growth Factor 2	Protein Coding	47	GC04P122826	14.58	https://www.genecards.org/cgi-bin/carddisp.pl?gene=FGF2															DFNA6
																		TNFRSF1B	TNF Receptor Superfamily Member 1B	Protein Coding	47	GC01P012167	14.55	https://www.genecards.org/cgi-bin/carddisp.pl?gene=TNFRSF1B															DFNB37
																		NDUFAF5	NADH:Ubiquinone Oxidoreductase Complex Assembly Factor 5	Protein Coding	36	GC20P013786	14.54	https://www.genecards.org/cgi-bin/carddisp.pl?gene=NDUFAF5															DGAT1
																		APOC3	Apolipoprotein C3	Protein Coding	43	GC11P116829	14.53	https://www.genecards.org/cgi-bin/carddisp.pl?gene=APOC3															DGUOK
																		NDUFAF4	NADH:Ubiquinone Oxidoreductase Complex Assembly Factor 4	Protein Coding	42	GC06M096889	14.52	https://www.genecards.org/cgi-bin/carddisp.pl?gene=NDUFAF4															DHDDS
																		CD40	CD40 Molecule	Protein Coding	48	GC20P046118	14.52	https://www.genecards.org/cgi-bin/carddisp.pl?gene=CD40															DI1
																		PVT1	Pvt1 Oncogene	RNA Gene	25	GC08P127804	14.5	https://www.genecards.org/cgi-bin/carddisp.pl?gene=PVT1															DIO2
																		NDUFA11	NADH:Ubiquinone Oxidoreductase Subunit A11	Protein Coding	37	GC19M005891	14.5	https://www.genecards.org/cgi-bin/carddisp.pl?gene=NDUFA11															DIR
																		ERN1	Endoplasmic Reticulum To Nucleus Signaling 1	Protein Coding	45	GC17M064039	14.48	https://www.genecards.org/cgi-bin/carddisp.pl?gene=ERN1															DIRA
																		POLG2	DNA Polymerase Gamma 2, Accessory Subunit	Protein Coding	41	GC17M064477	14.43	https://www.genecards.org/cgi-bin/carddisp.pl?gene=POLG2															DIRAS3
																		IFNA1	Interferon Alpha 1	Protein Coding	39	GC09P021494	14.38	https://www.genecards.org/cgi-bin/carddisp.pl?gene=IFNA1															DKC1
																		GATAD1	GATA Zinc Finger Domain Containing 1	Protein Coding	37	GC07P092447	14.36	https://www.genecards.org/cgi-bin/carddisp.pl?gene=GATAD1															DLD
																		CYBB	Cytochrome B-245 Beta Chain	Protein Coding	47	GC0XP037780	14.35	https://www.genecards.org/cgi-bin/carddisp.pl?gene=CYBB															DLK1
																		SCN1A	Sodium Voltage-Gated Channel Alpha Subunit 1	Protein Coding	47	GC02M165989	14.33	https://www.genecards.org/cgi-bin/carddisp.pl?gene=SCN1A															DLL1
																		TMEM126A	Transmembrane Protein 126A	Protein Coding	39	GC11P085647	14.3	https://www.genecards.org/cgi-bin/carddisp.pl?gene=TMEM126A															DMD
																		DARS2	Aspartyl-TRNA Synthetase 2, Mitochondrial	Protein Coding	41	GC01P173824	14.29	https://www.genecards.org/cgi-bin/carddisp.pl?gene=DARS2															DMPK
																		MIR132	MicroRNA 132	RNA Gene	21	GC17M002049	14.28	https://www.genecards.org/cgi-bin/carddisp.pl?gene=MIR132															DNAAF3
																		TIMP3	TIMP Metallopeptidase Inhibitor 3	Protein Coding	45	GC22P032800	14.27	https://www.genecards.org/cgi-bin/carddisp.pl?gene=TIMP3															DNAH8
																		CD274	CD274 Molecule	Protein Coding	44	GC09P005450	14.26	https://www.genecards.org/cgi-bin/carddisp.pl?gene=CD274															DNAJC21
																		H19	H19 Imprinted Maternally Expressed Transcript	RNA Gene	28	GC11M001995	14.25	https://www.genecards.org/cgi-bin/carddisp.pl?gene=H19															DNAJC3
																		ATF6	Activating Transcription Factor 6	Protein Coding	47	GC01P161766	14.23	https://www.genecards.org/cgi-bin/carddisp.pl?gene=ATF6															DNASE1L1
																		TIMMDC1	Translocase Of Inner Mitochondrial Membrane Domain Containing 1	Protein Coding	36	GC03P119498	14.21	https://www.genecards.org/cgi-bin/carddisp.pl?gene=TIMMDC1															DNM1
																		TRIM32	Tripartite Motif Containing 32	Protein Coding	43	GC09P116687	14.19	https://www.genecards.org/cgi-bin/carddisp.pl?gene=TRIM32															DNM1L
																		HCCS	Holocytochrome C Synthase	Protein Coding	41	GC0XP011111	14.17	https://www.genecards.org/cgi-bin/carddisp.pl?gene=HCCS															DNM2
																		MT-RNR1	Mitochondrially Encoded 12S RRNA	RNA Gene	14	GCMTP000642	14.11	https://www.genecards.org/cgi-bin/carddisp.pl?gene=MT-RNR1															DNMT1
																		ACADL	Acyl-CoA Dehydrogenase Long Chain	Protein Coding	43	GC02M210187	14.11	https://www.genecards.org/cgi-bin/carddisp.pl?gene=ACADL															DNMT3L
																		IL7R	Interleukin 7 Receptor	Protein Coding	47	GC05P035852	14.09	https://www.genecards.org/cgi-bin/carddisp.pl?gene=IL7R															DPP4
																		MIR196A2	MicroRNA 196a-2	RNA Gene	21	GC12P054200	14.08	https://www.genecards.org/cgi-bin/carddisp.pl?gene=MIR196A2															DPP6
																		PDSS2	Decaprenyl Diphosphate Synthase Subunit 2	Protein Coding	40	GC06M107152	14.06	https://www.genecards.org/cgi-bin/carddisp.pl?gene=PDSS2															DRD2
																		MIR197	MicroRNA 197	RNA Gene	19	GC01P109549	14.05	https://www.genecards.org/cgi-bin/carddisp.pl?gene=MIR197															DRD5
																		TNFRSF11B	TNF Receptor Superfamily Member 11b	Protein Coding	47	GC08M118923	14.03	https://www.genecards.org/cgi-bin/carddisp.pl?gene=TNFRSF11B															DSC2
																		TF	Transferrin	Protein Coding	49	GC03P133666	14.02	https://www.genecards.org/cgi-bin/carddisp.pl?gene=TF															DSG1
																		CDH2	Cadherin 2	Protein Coding	50	GC18M027950	14.01	https://www.genecards.org/cgi-bin/carddisp.pl?gene=CDH2															DSG2
																		PTH	Parathyroid Hormone	Protein Coding	47	GC11M013492	13.97	https://www.genecards.org/cgi-bin/carddisp.pl?gene=PTH															DSG3
																		TNFRSF1A	TNF Receptor Superfamily Member 1A	Protein Coding	49	GC12M006328	13.97	https://www.genecards.org/cgi-bin/carddisp.pl?gene=TNFRSF1A															DSP
																		NR1H2	Nuclear Receptor Subfamily 1 Group H Member 2	Protein Coding	48	GC19P050329	13.94	https://www.genecards.org/cgi-bin/carddisp.pl?gene=NR1H2															DSTYK
																		NDUFA6	NADH:Ubiquinone Oxidoreductase Subunit A6	Protein Coding	44	GC22M042085	13.89	https://www.genecards.org/cgi-bin/carddisp.pl?gene=NDUFA6															DTNA
																		HSPA1A	Heat Shock Protein Family A (Hsp70) Member 1A	Protein Coding	43	GC06P047326	13.86	https://www.genecards.org/cgi-bin/carddisp.pl?gene=HSPA1A															DTNBP1
																		CALR	Calreticulin	Protein Coding	51	GC19P012938	13.86	https://www.genecards.org/cgi-bin/carddisp.pl?gene=CALR															DUS1L
																		MMP14	Matrix Metallopeptidase 14	Protein Coding	51	GC14P025277	13.85	https://www.genecards.org/cgi-bin/carddisp.pl?gene=MMP14															DUSP1
																		MIR10A	MicroRNA 10a	RNA Gene	21	GC17M048579	13.85	https://www.genecards.org/cgi-bin/carddisp.pl?gene=MIR10A															DUSP5
																		NDUFS6	NADH:Ubiquinone Oxidoreductase Subunit S6	Protein Coding	43	GC05P001801	13.85	https://www.genecards.org/cgi-bin/carddisp.pl?gene=NDUFS6															DYSF
																		STAT5B	Signal Transducer And Activator Of Transcription 5B	Protein Coding	49	GC17M042199	13.83	https://www.genecards.org/cgi-bin/carddisp.pl?gene=STAT5B															ECHS1
																		YARS2	Tyrosyl-TRNA Synthetase 2	Protein Coding	44	GC12M032725	13.83	https://www.genecards.org/cgi-bin/carddisp.pl?gene=YARS2															ECYT5
																		SHH	Sonic Hedgehog Signaling Molecule	Protein Coding	50	GC07M155799	13.82	https://www.genecards.org/cgi-bin/carddisp.pl?gene=SHH															EDN1
																		DNAH8	Dynein Axonemal Heavy Chain 8	Protein Coding	37	GC06P047481	13.81	https://www.genecards.org/cgi-bin/carddisp.pl?gene=DNAH8															EDNRA
																		FGFR1	Fibroblast Growth Factor Receptor 1	Protein Coding	55	GC08M038400	13.79	https://www.genecards.org/cgi-bin/carddisp.pl?gene=FGFR1															EDNRB
																		MIR145	MicroRNA 145	RNA Gene	21	GC05P149430	13.78	https://www.genecards.org/cgi-bin/carddisp.pl?gene=MIR145															EFEMP1
																		FNDC5	Fibronectin Type III Domain Containing 5	Protein Coding	34	GC01M032864	13.78	https://www.genecards.org/cgi-bin/carddisp.pl?gene=FNDC5															EFTUD2
																		MFN2	Mitofusin 2	Protein Coding	48	GC01P011980	13.77	https://www.genecards.org/cgi-bin/carddisp.pl?gene=MFN2															EGF
																		NDUFA13	NADH:Ubiquinone Oxidoreductase Subunit A13	Protein Coding	44	GC19P019515	13.77	https://www.genecards.org/cgi-bin/carddisp.pl?gene=NDUFA13															EGFR
																		CD38	CD38 Molecule	Protein Coding	45	GC04P015779	13.77	https://www.genecards.org/cgi-bin/carddisp.pl?gene=CD38															EIF2AK1
																		GZMB	Granzyme B	Protein Coding	45	GC14M024630	13.77	https://www.genecards.org/cgi-bin/carddisp.pl?gene=GZMB															EIF2AK3
																		JAK2	Janus Kinase 2	Protein Coding	54	GC09P004985	13.74	https://www.genecards.org/cgi-bin/carddisp.pl?gene=JAK2															ELAC2
																		FGF21	Fibroblast Growth Factor 21	Protein Coding	40	GC19P048766	13.73	https://www.genecards.org/cgi-bin/carddisp.pl?gene=FGF21															ELMO1
																		UQCRFS1	Ubiquinol-Cytochrome C Reductase, Rieske Iron-Sulfur Polypeptide 1	Protein Coding	45	GC19M029205	13.73	https://www.genecards.org/cgi-bin/carddisp.pl?gene=UQCRFS1															ELN
																		COX8A	Cytochrome C Oxidase Subunit 8A	Protein Coding	41	GC11P063977	13.64	https://www.genecards.org/cgi-bin/carddisp.pl?gene=COX8A															EMD
																		IKBKB	Inhibitor Of Nuclear Factor Kappa B Kinase Subunit Beta	Protein Coding	52	GC08P042271	13.59	https://www.genecards.org/cgi-bin/carddisp.pl?gene=IKBKB															EMD2
																		AMBP	Alpha-1-Microglobulin/Bikunin Precursor	Protein Coding	41	GC09M114060	13.58	https://www.genecards.org/cgi-bin/carddisp.pl?gene=AMBP															ENHO
																		HSD11B1	Hydroxysteroid 11-Beta Dehydrogenase 1	Protein Coding	49	GC01P209686	13.55	https://www.genecards.org/cgi-bin/carddisp.pl?gene=HSD11B1															Eno2
																		MGME1	Mitochondrial Genome Maintenance Exonuclease 1	Protein Coding	35	GC20P017952	13.52	https://www.genecards.org/cgi-bin/carddisp.pl?gene=MGME1															Eno3
																		APOA4	Apolipoprotein A4	Protein Coding	42	GC11M116820	13.52	https://www.genecards.org/cgi-bin/carddisp.pl?gene=APOA4															ENPP1
																		APOA2	Apolipoprotein A2	Protein Coding	44	GC01M161222	13.5	https://www.genecards.org/cgi-bin/carddisp.pl?gene=APOA2															ENTPD1
																		COL17A1	Collagen Type XVII Alpha 1 Chain	Protein Coding	43	GC10M104031	13.5	https://www.genecards.org/cgi-bin/carddisp.pl?gene=COL17A1															EP300
																		HSPA5	Heat Shock Protein Family A (Hsp70) Member 5	Protein Coding	47	GC09M125234	13.49	https://www.genecards.org/cgi-bin/carddisp.pl?gene=HSPA5															EPB42
																		SUFU	SUFU Negative Regulator Of Hedgehog Signaling	Protein Coding	43	GC10P102503	13.48	https://www.genecards.org/cgi-bin/carddisp.pl?gene=SUFU															EPG5
																		DCAF8	DDB1 And CUL4 Associated Factor 8	Protein Coding	38	GC01M160215	13.46	https://www.genecards.org/cgi-bin/carddisp.pl?gene=DCAF8															EPHB2
																		VPS13A	Vacuolar Protein Sorting 13 Homolog A	Protein Coding	40	GC09P077177	13.46	https://www.genecards.org/cgi-bin/carddisp.pl?gene=VPS13A															EPO
																		EGF	Epidermal Growth Factor	Protein Coding	51	GC04P109912	13.45	https://www.genecards.org/cgi-bin/carddisp.pl?gene=EGF															EPRS1
																		HBA2	Hemoglobin Subunit Alpha 2	Protein Coding	42	GC16P001373	13.45	https://www.genecards.org/cgi-bin/carddisp.pl?gene=HBA2															ERBB2
																		FASLG	Fas Ligand	Protein Coding	47	GC01P172628	13.44	https://www.genecards.org/cgi-bin/carddisp.pl?gene=FASLG															ERBB3
																		MIR221	MicroRNA 221	RNA Gene	20	GC0XM045746	13.41	https://www.genecards.org/cgi-bin/carddisp.pl?gene=MIR221															ERBB4
																		CDC123	Cell Division Cycle 123	Protein Coding	35	GC10P012195	13.41	https://www.genecards.org/cgi-bin/carddisp.pl?gene=CDC123															ERCC1
																		HSPA4	Heat Shock Protein Family A (Hsp70) Member 4	Protein Coding	41	GC05P133051	13.4	https://www.genecards.org/cgi-bin/carddisp.pl?gene=HSPA4															ERCC2
																		BAZ1B	Bromodomain Adjacent To Zinc Finger Domain 1B	Protein Coding	40	GC07M073440	13.38	https://www.genecards.org/cgi-bin/carddisp.pl?gene=BAZ1B															ERCC3
																		MKKS	McKusick-Kaufman Syndrome	Protein Coding	39	GC20M010412	13.36	https://www.genecards.org/cgi-bin/carddisp.pl?gene=MKKS															ERCC4
																		SRC	SRC Proto-Oncogene, Non-Receptor Tyrosine Kinase	Protein Coding	51	GC20P037344	13.32	https://www.genecards.org/cgi-bin/carddisp.pl?gene=SRC															ERCC6
																		PON2	Paraoxonase 2	Protein Coding	42	GC07M095404	13.32	https://www.genecards.org/cgi-bin/carddisp.pl?gene=PON2															ERFE
																		PRKCA	Protein Kinase C Alpha	Protein Coding	50	GC17P066302	13.3	https://www.genecards.org/cgi-bin/carddisp.pl?gene=PRKCA															ERN1
																		FOXH1	Forkhead Box H1	Protein Coding	41	GC08M144473	13.29	https://www.genecards.org/cgi-bin/carddisp.pl?gene=FOXH1															ESA
																		MSTN	Myostatin	Protein Coding	45	GC02M190055	13.28	https://www.genecards.org/cgi-bin/carddisp.pl?gene=MSTN															ESR1
																		TLR1	Toll Like Receptor 1	Protein Coding	47	GC04M038797	13.27	https://www.genecards.org/cgi-bin/carddisp.pl?gene=TLR1															ESR2
																		HGSNAT	Heparan-Alpha-Glucosaminide N-Acetyltransferase	Protein Coding	39	GC08P043140	13.27	https://www.genecards.org/cgi-bin/carddisp.pl?gene=HGSNAT															ESRRA
																		GDF15	Growth Differentiation Factor 15	Protein Coding	41	GC19P023329	13.25	https://www.genecards.org/cgi-bin/carddisp.pl?gene=GDF15															ETFA
																		LRP5	LDL Receptor Related Protein 5	Protein Coding	48	GC11P068298	13.25	https://www.genecards.org/cgi-bin/carddisp.pl?gene=LRP5															ETFB
																		PSMB8	Proteasome 20S Subunit Beta 8	Protein Coding	49	GC06M032840	13.22	https://www.genecards.org/cgi-bin/carddisp.pl?gene=PSMB8															ETFDH
																		SNCA	Synuclein Alpha	Protein Coding	50	GC04M089724	13.21	https://www.genecards.org/cgi-bin/carddisp.pl?gene=SNCA															EXOSC4
																		SLC5A1	Solute Carrier Family 5 Member 1	Protein Coding	49	GC22P032043	13.19	https://www.genecards.org/cgi-bin/carddisp.pl?gene=SLC5A1															EYA1
																		CYP21A2	Cytochrome P450 Family 21 Subfamily A Member 2	Protein Coding	45	GC06P047333	13.11	https://www.genecards.org/cgi-bin/carddisp.pl?gene=CYP21A2															EYA4
																		CYP11B2	Cytochrome P450 Family 11 Subfamily B Member 2	Protein Coding	47	GC08M142910	13.09	https://www.genecards.org/cgi-bin/carddisp.pl?gene=CYP11B2															EYS
																		DLD	Dihydrolipoamide Dehydrogenase	Protein Coding	50	GC07P107890	13.07	https://www.genecards.org/cgi-bin/carddisp.pl?gene=DLD															F13A1
																		MIR134	MicroRNA 134	RNA Gene	18	GC14P104777	13.06	https://www.genecards.org/cgi-bin/carddisp.pl?gene=MIR134															F2
																		CALR3	Calreticulin 3	Protein Coding	37	GC19M016450	13.01	https://www.genecards.org/cgi-bin/carddisp.pl?gene=CALR3															F3
																		TIMP2	TIMP Metallopeptidase Inhibitor 2	Protein Coding	44	GC17M078852	12.97	https://www.genecards.org/cgi-bin/carddisp.pl?gene=TIMP2															F5
																		NDUFAF6	NADH:Ubiquinone Oxidoreductase Complex Assembly Factor 6	Protein Coding	35	GC08P094895	12.97	https://www.genecards.org/cgi-bin/carddisp.pl?gene=NDUFAF6															F9
																		COG2	Component Of Oligomeric Golgi Complex 2	Protein Coding	40	GC01P230642	12.96	https://www.genecards.org/cgi-bin/carddisp.pl?gene=COG2															FABP1
																		TREX1	Three Prime Repair Exonuclease 1	Protein Coding	42	GC03P048466	12.95	https://www.genecards.org/cgi-bin/carddisp.pl?gene=TREX1															FABP12
																		THADA	THADA Armadillo Repeat Containing	Protein Coding	37	GC02M043193	12.94	https://www.genecards.org/cgi-bin/carddisp.pl?gene=THADA															FABP3
																		TBL2	Transducin Beta Like 2	Protein Coding	39	GC07M073568	12.94	https://www.genecards.org/cgi-bin/carddisp.pl?gene=TBL2															FABP4
																		TLR7	Toll Like Receptor 7	Protein Coding	46	GC0XP012867	12.93	https://www.genecards.org/cgi-bin/carddisp.pl?gene=TLR7															FADS1
																		NDUFA2	NADH:Ubiquinone Oxidoreductase Subunit A2	Protein Coding	42	GC05M140640	12.91	https://www.genecards.org/cgi-bin/carddisp.pl?gene=NDUFA2															FAH
																		WDTC1	WD And Tetratricopeptide Repeats 1	Protein Coding	34	GC01P027245	12.9	https://www.genecards.org/cgi-bin/carddisp.pl?gene=WDTC1															FAM50B
																		GK	Glycerol Kinase	Protein Coding	47	GC0XP030671	12.9	https://www.genecards.org/cgi-bin/carddisp.pl?gene=GK															FANCA
																		CYP3A4	Cytochrome P450 Family 3 Subfamily A Member 4	Protein Coding	48	GC07M099759	12.87	https://www.genecards.org/cgi-bin/carddisp.pl?gene=CYP3A4															FANCB
																		SDHAF1	Succinate Dehydrogenase Complex Assembly Factor 1	Protein Coding	35	GC19P035995	12.86	https://www.genecards.org/cgi-bin/carddisp.pl?gene=SDHAF1															FANCC
																		PRKAR1A	Protein Kinase CAMP-Dependent Type I Regulatory Subunit Alpha	Protein Coding	51	GC17P068414	12.86	https://www.genecards.org/cgi-bin/carddisp.pl?gene=PRKAR1A															FANCD2
																		CSF3	Colony Stimulating Factor 3	Protein Coding	40	GC17P040015	12.83	https://www.genecards.org/cgi-bin/carddisp.pl?gene=CSF3															FANCE
																		PRKCZ	Protein Kinase C Zeta	Protein Coding	48	GC01P002050	12.8	https://www.genecards.org/cgi-bin/carddisp.pl?gene=PRKCZ															FANCF
																		CLCN1	Chloride Voltage-Gated Channel 1	Protein Coding	44	GC07P143316	12.79	https://www.genecards.org/cgi-bin/carddisp.pl?gene=CLCN1															FANCG
																		MIR222	MicroRNA 222	RNA Gene	21	GC0XM045747	12.78	https://www.genecards.org/cgi-bin/carddisp.pl?gene=MIR222															FANCI
																		GLB1	Galactosidase Beta 1	Protein Coding	48	GC03M033013	12.78	https://www.genecards.org/cgi-bin/carddisp.pl?gene=GLB1															FANCL
																		SIM1	SIM BHLH Transcription Factor 1	Protein Coding	40	GC06M100386	12.78	https://www.genecards.org/cgi-bin/carddisp.pl?gene=SIM1															FANCM
																		ATP2A2	ATPase Sarcoplasmic/Endoplasmic Reticulum Ca2+ Transporting 2	Protein Coding	51	GC12P110280	12.77	https://www.genecards.org/cgi-bin/carddisp.pl?gene=ATP2A2															FAS
																		COX4I1	Cytochrome C Oxidase Subunit 4I1	Protein Coding	44	GC16P085798	12.77	https://www.genecards.org/cgi-bin/carddisp.pl?gene=COX4I1															FASLG
																		LIMS2	LIM Zinc Finger Domain Containing 2	Protein Coding	40	GC02M127638	12.77	https://www.genecards.org/cgi-bin/carddisp.pl?gene=LIMS2															FASTKD2
																		GTF2I	General Transcription Factor IIi	Protein Coding	42	GC07P074658	12.73	https://www.genecards.org/cgi-bin/carddisp.pl?gene=GTF2I															FBN1
																		TERT	Telomerase Reverse Transcriptase	Protein Coding	51	GC05M001253	12.71	https://www.genecards.org/cgi-bin/carddisp.pl?gene=TERT															FBXL4
																		AGTR2	Angiotensin II Receptor Type 2	Protein Coding	43	GC0XP116170	12.71	https://www.genecards.org/cgi-bin/carddisp.pl?gene=AGTR2															Fbxo21
																		CTF1	Cardiotrophin 1	Protein Coding	39	GC16P030910	12.7	https://www.genecards.org/cgi-bin/carddisp.pl?gene=CTF1															FCGR2A
																		SIRT3	Sirtuin 3	Protein Coding	48	GC11M000215	12.67	https://www.genecards.org/cgi-bin/carddisp.pl?gene=SIRT3															FCGR3B
																		ABCA1	ATP Binding Cassette Subfamily A Member 1	Protein Coding	48	GC09M104781	12.67	https://www.genecards.org/cgi-bin/carddisp.pl?gene=ABCA1															FCMD
																		LIMK1	LIM Domain Kinase 1	Protein Coding	49	GC07P074082	12.66	https://www.genecards.org/cgi-bin/carddisp.pl?gene=LIMK1															FDC
																		IL5	Interleukin 5	Protein Coding	44	GC05M132541	12.64	https://www.genecards.org/cgi-bin/carddisp.pl?gene=IL5															FECH
																		RFC2	Replication Factor C Subunit 2	Protein Coding	44	GC07M074231	12.64	https://www.genecards.org/cgi-bin/carddisp.pl?gene=RFC2															FGA
																		GTF2IRD1	GTF2I Repeat Domain Containing 1	Protein Coding	42	GC07P074461	12.64	https://www.genecards.org/cgi-bin/carddisp.pl?gene=GTF2IRD1															FGF1
																		CLIP2	CAP-Gly Domain Containing Linker Protein 2	Protein Coding	37	GC07P074289	12.64	https://www.genecards.org/cgi-bin/carddisp.pl?gene=CLIP2															FGF19
																		MAPT	Microtubule Associated Protein Tau	Protein Coding	50	GC17P045894	12.6	https://www.genecards.org/cgi-bin/carddisp.pl?gene=MAPT															FGF2
																		NR3C1	Nuclear Receptor Subfamily 3 Group C Member 1	Protein Coding	50	GC05M143277	12.57	https://www.genecards.org/cgi-bin/carddisp.pl?gene=NR3C1															FGF21
																		PMPCA	Peptidase, Mitochondrial Processing Subunit Alpha	Protein Coding	43	GC09P136410	12.55	https://www.genecards.org/cgi-bin/carddisp.pl?gene=PMPCA															FGF23
																		GJB2	Gap Junction Protein Beta 2	Protein Coding	47	GC13M020187	12.55	https://www.genecards.org/cgi-bin/carddisp.pl?gene=GJB2															FGF8
																		MKS1	MKS Transition Zone Complex Subunit 1	Protein Coding	40	GC17M058205	12.54	https://www.genecards.org/cgi-bin/carddisp.pl?gene=MKS1															FGFR1
																		EP300	E1A Binding Protein P300	Protein Coding	50	GC22P041091	12.53	https://www.genecards.org/cgi-bin/carddisp.pl?gene=EP300															FGFR3
																		MPO	Myeloperoxidase	Protein Coding	50	GC17M058269	12.51	https://www.genecards.org/cgi-bin/carddisp.pl?gene=MPO															FGGY
																		TOP3A	DNA Topoisomerase III Alpha	Protein Coding	42	GC17M018271	12.49	https://www.genecards.org/cgi-bin/carddisp.pl?gene=TOP3A															FGL2
																		ADCY5	Adenylate Cyclase 5	Protein Coding	48	GC03M123282	12.47	https://www.genecards.org/cgi-bin/carddisp.pl?gene=ADCY5															FH
																		HMGCL	3-Hydroxy-3-Methylglutaryl-CoA Lyase	Protein Coding	46	GC01M023801	12.46	https://www.genecards.org/cgi-bin/carddisp.pl?gene=HMGCL															FHL2
																		TLR6	Toll Like Receptor 6	Protein Coding	44	GC04M038828	12.45	https://www.genecards.org/cgi-bin/carddisp.pl?gene=TLR6															FHOD3
																		CACNA1S	Calcium Voltage-Gated Channel Subunit Alpha1 S	Protein Coding	48	GC01M201008	12.45	https://www.genecards.org/cgi-bin/carddisp.pl?gene=CACNA1S															FIG4
																		CD80	CD80 Molecule	Protein Coding	41	GC03M119524	12.45	https://www.genecards.org/cgi-bin/carddisp.pl?gene=CD80															FIP1L1
																		CFAP410	Cilia And Flagella Associated Protein 410	Protein Coding	29	GC21M044330	12.45	https://www.genecards.org/cgi-bin/carddisp.pl?gene=CFAP410															FIZZ3
																		DNM1L	Dynamin 1 Like	Protein Coding	47	GC12P032679	12.44	https://www.genecards.org/cgi-bin/carddisp.pl?gene=DNM1L															FJHN
																		NFKBIA	NFKB Inhibitor Alpha	Protein Coding	50	GC14M035401	12.42	https://www.genecards.org/cgi-bin/carddisp.pl?gene=NFKBIA															FKBP1B
																		CASP9	Caspase 9	Protein Coding	48	GC01M015491	12.42	https://www.genecards.org/cgi-bin/carddisp.pl?gene=CASP9															FKHL14
																		PARP1	Poly(ADP-Ribose) Polymerase 1	Protein Coding	49	GC01M226360	12.41	https://www.genecards.org/cgi-bin/carddisp.pl?gene=PARP1															FKLF
																		EGFR	Epidermal Growth Factor Receptor	Protein Coding	54	GC07P055019	12.38	https://www.genecards.org/cgi-bin/carddisp.pl?gene=EGFR															FKLF1
																		MIR181A2	MicroRNA 181a-2	RNA Gene	20	GC09P124692	12.36	https://www.genecards.org/cgi-bin/carddisp.pl?gene=MIR181A2															FKRP
																		NLRP3	NLR Family Pyrin Domain Containing 3	Protein Coding	47	GC01P247415	12.33	https://www.genecards.org/cgi-bin/carddisp.pl?gene=NLRP3															FKTN
																		MALAT1	Metastasis Associated Lung Adenocarcinoma Transcript 1	RNA Gene	24	GC11P065806	12.33	https://www.genecards.org/cgi-bin/carddisp.pl?gene=MALAT1															FLAD1
																		FBXL4	F-Box And Leucine Rich Repeat Protein 4	Protein Coding	39	GC06M098868	12.31	https://www.genecards.org/cgi-bin/carddisp.pl?gene=FBXL4															FLN2
																		MIR30A	MicroRNA 30a	RNA Gene	20	GC06M071403	12.31	https://www.genecards.org/cgi-bin/carddisp.pl?gene=MIR30A															FLNC
																		VCP	Valosin Containing Protein	Protein Coding	48	GC09M035056	12.28	https://www.genecards.org/cgi-bin/carddisp.pl?gene=VCP															FLT1
																		ITGA8	Integrin Subunit Alpha 8	Protein Coding	42	GC10M015513	12.27	https://www.genecards.org/cgi-bin/carddisp.pl?gene=ITGA8															FMR1
																		MAP2K7	Mitogen-Activated Protein Kinase Kinase 7	Protein Coding	45	GC19P007903	12.25	https://www.genecards.org/cgi-bin/carddisp.pl?gene=MAP2K7															FN1
																		CCK	Cholecystokinin	Protein Coding	41	GC03M042274	12.25	https://www.genecards.org/cgi-bin/carddisp.pl?gene=CCK															FNDC5
																		ATP5F1E	ATP Synthase F1 Subunit Epsilon	Protein Coding	32	GC20M059026	12.25	https://www.genecards.org/cgi-bin/carddisp.pl?gene=ATP5F1E															FOS
																		ACADM	Acyl-CoA Dehydrogenase Medium Chain	Protein Coding	47	GC01P075724	12.24	https://www.genecards.org/cgi-bin/carddisp.pl?gene=ACADM															FOXC2
																		CALCA	Calcitonin Related Polypeptide Alpha	Protein Coding	43	GC11M014945	12.2	https://www.genecards.org/cgi-bin/carddisp.pl?gene=CALCA															FOXH1
																		SMAD4	SMAD Family Member 4	Protein Coding	50	GC18P051028	12.19	https://www.genecards.org/cgi-bin/carddisp.pl?gene=SMAD4															FOXO1
																		PRKCB	Protein Kinase C Beta	Protein Coding	47	GC16P023892	12.19	https://www.genecards.org/cgi-bin/carddisp.pl?gene=PRKCB															FOXO3
																		ACTG1	Actin Gamma 1	Protein Coding	50	GC17M081509	12.19	https://www.genecards.org/cgi-bin/carddisp.pl?gene=ACTG1															FOXP3
																		PDP1	Pyruvate Dehyrogenase Phosphatase Catalytic Subunit 1	Protein Coding	45	GC08P093857	12.18	https://www.genecards.org/cgi-bin/carddisp.pl?gene=PDP1															FOXRED1
																		CISH	Cytokine Inducible SH2 Containing Protein	Protein Coding	44	GC03M050618	12.18	https://www.genecards.org/cgi-bin/carddisp.pl?gene=CISH															FPLD2
																		ITGB1	Integrin Subunit Beta 1	Protein Coding	50	GC10M032900	12.17	https://www.genecards.org/cgi-bin/carddisp.pl?gene=ITGB1															FRDA2
																		TRPV4	Transient Receptor Potential Cation Channel Subfamily V Member 4	Protein Coding	49	GC12M109783	12.17	https://www.genecards.org/cgi-bin/carddisp.pl?gene=TRPV4															FREM2
																		JAZF1	JAZF Zinc Finger 1	Protein Coding	39	GC07M027830	12.16	https://www.genecards.org/cgi-bin/carddisp.pl?gene=JAZF1															FRTS4
																		GAL	Galanin And GMAP Prepropeptide	Protein Coding	44	GC11P068684	12.09	https://www.genecards.org/cgi-bin/carddisp.pl?gene=GAL															FSCN2
																		APP	Amyloid Beta Precursor Protein	Protein Coding	51	GC21M025880	12.07	https://www.genecards.org/cgi-bin/carddisp.pl?gene=APP															FST
																		USP8	Ubiquitin Specific Peptidase 8	Protein Coding	48	GC15P050424	12.05	https://www.genecards.org/cgi-bin/carddisp.pl?gene=USP8															FTH1
																		SGCB	Sarcoglycan Beta	Protein Coding	40	GC04M052019	12.05	https://www.genecards.org/cgi-bin/carddisp.pl?gene=SGCB															FTL
																		IDH3A	Isocitrate Dehydrogenase (NAD(+)) 3 Catalytic Subunit Alpha	Protein Coding	45	GC15P078131	12.05	https://www.genecards.org/cgi-bin/carddisp.pl?gene=IDH3A															FTMT
																		CCL11	C-C Motif Chemokine Ligand 11	Protein Coding	43	GC17P034285	12.04	https://www.genecards.org/cgi-bin/carddisp.pl?gene=CCL11															FTO
																		PANK2	Pantothenate Kinase 2	Protein Coding	43	GC20P003887	12.03	https://www.genecards.org/cgi-bin/carddisp.pl?gene=PANK2															FTSJ1
																		TGIF1	TGFB Induced Factor Homeobox 1	Protein Coding	45	GC18P003411	12.02	https://www.genecards.org/cgi-bin/carddisp.pl?gene=TGIF1															FUZ
																		SERPINC1	Serpin Family C Member 1	Protein Coding	48	GC01M174153	11.98	https://www.genecards.org/cgi-bin/carddisp.pl?gene=SERPINC1															FXN
																		TNNI3K	TNNI3 Interacting Kinase	Protein Coding	40	GC01P074235	11.97	https://www.genecards.org/cgi-bin/carddisp.pl?gene=TNNI3K															FXYD2
																		GLO1	Glyoxalase I	Protein Coding	45	GC06M042239	11.96	https://www.genecards.org/cgi-bin/carddisp.pl?gene=GLO1															G6PC
																		EFTUD2	Elongation Factor Tu GTP Binding Domain Containing 2	Protein Coding	42	GC17M044852	11.95	https://www.genecards.org/cgi-bin/carddisp.pl?gene=EFTUD2															G6PD
																		GOT2	Glutamic-Oxaloacetic Transaminase 2	Protein Coding	45	GC16M058707	11.93	https://www.genecards.org/cgi-bin/carddisp.pl?gene=GOT2															GAA
																		CRH	Corticotropin Releasing Hormone	Protein Coding	44	GC08M066176	11.93	https://www.genecards.org/cgi-bin/carddisp.pl?gene=CRH															GABARAPL1
																		MIR210	MicroRNA 210	RNA Gene	21	GC11M000674	11.93	https://www.genecards.org/cgi-bin/carddisp.pl?gene=MIR210															GABBR1
																		MTFMT	Mitochondrial Methionyl-TRNA Formyltransferase	Protein Coding	41	GC15M065001	11.93	https://www.genecards.org/cgi-bin/carddisp.pl?gene=MTFMT															GABPA
																		COQ4	Coenzyme Q4	Protein Coding	39	GC09P128322	11.89	https://www.genecards.org/cgi-bin/carddisp.pl?gene=COQ4															GAL
																		PYY	Peptide YY	Protein Coding	42	GC17M043952	11.87	https://www.genecards.org/cgi-bin/carddisp.pl?gene=PYY															GAP43
																		LPIN1	Lipin 1	Protein Coding	48	GC02P011649	11.85	https://www.genecards.org/cgi-bin/carddisp.pl?gene=LPIN1															GAPDH
																		MT-TN	Mitochondrially Encoded TRNA-Asn (AAU/C)	RNA Gene	12	GCMTM005659	11.83	https://www.genecards.org/cgi-bin/carddisp.pl?gene=MT-TN															GAS5
																		ITGAM	Integrin Subunit Alpha M	Protein Coding	46	GC16P031550	11.79	https://www.genecards.org/cgi-bin/carddisp.pl?gene=ITGAM															GAST
																		ETFB	Electron Transfer Flavoprotein Subunit Beta	Protein Coding	45	GC19M051345	11.78	https://www.genecards.org/cgi-bin/carddisp.pl?gene=ETFB															GATA1
																		NAMPT	Nicotinamide Phosphoribosyltransferase	Protein Coding	48	GC07M106248	11.78	https://www.genecards.org/cgi-bin/carddisp.pl?gene=NAMPT															GATA3
																		GLI2	GLI Family Zinc Finger 2	Protein Coding	47	GC02P120735	11.75	https://www.genecards.org/cgi-bin/carddisp.pl?gene=GLI2															GATA4
																		TKT	Transketolase	Protein Coding	46	GC03M053224	11.75	https://www.genecards.org/cgi-bin/carddisp.pl?gene=TKT															GATA5
																		PEX10	Peroxisomal Biogenesis Factor 10	Protein Coding	41	GC01M002403	11.74	https://www.genecards.org/cgi-bin/carddisp.pl?gene=PEX10															GATA6
																		MYOD1	Myogenic Differentiation 1	Protein Coding	46	GC11P017741	11.73	https://www.genecards.org/cgi-bin/carddisp.pl?gene=MYOD1															GATAD1
																		TLR10	Toll Like Receptor 10	Protein Coding	40	GC04M038773	11.72	https://www.genecards.org/cgi-bin/carddisp.pl?gene=TLR10															GBA
																		NCF1	Neutrophil Cytosolic Factor 1	Protein Coding	48	GC07P074773	11.72	https://www.genecards.org/cgi-bin/carddisp.pl?gene=NCF1															GBE1
																		MIR146B	MicroRNA 146b	RNA Gene	19	GC10P102436	11.71	https://www.genecards.org/cgi-bin/carddisp.pl?gene=MIR146B															GCG
																		GSTM1	Glutathione S-Transferase Mu 1	Protein Coding	41	GC01P109687	11.71	https://www.genecards.org/cgi-bin/carddisp.pl?gene=GSTM1															GCK
																		KDR	Kinase Insert Domain Receptor	Protein Coding	53	GC04M055078	11.7	https://www.genecards.org/cgi-bin/carddisp.pl?gene=KDR															Gclc
																		CDKN2B-AS1	CDKN2B Antisense RNA 1	RNA Gene	21	GC09P021994	11.69	https://www.genecards.org/cgi-bin/carddisp.pl?gene=CDKN2B-AS1															GCM2
																		CCL5	C-C Motif Chemokine Ligand 5	Protein Coding	43	GC17M035871	11.67	https://www.genecards.org/cgi-bin/carddisp.pl?gene=CCL5															GDF15
																		EDNRA	Endothelin Receptor Type A	Protein Coding	49	GC04P147480	11.65	https://www.genecards.org/cgi-bin/carddisp.pl?gene=EDNRA															GFM2
																		NEU1	Neuraminidase 1	Protein Coding	44	GC06M031857	11.65	https://www.genecards.org/cgi-bin/carddisp.pl?gene=NEU1															GGCT
																		CTSB	Cathepsin B	Protein Coding	51	GC08M011842	11.64	https://www.genecards.org/cgi-bin/carddisp.pl?gene=CTSB															GGT1
																		NPTX2	Neuronal Pentraxin 2	Protein Coding	39	GC07P098620	11.64	https://www.genecards.org/cgi-bin/carddisp.pl?gene=NPTX2															GGT2
																		TRH	Thyrotropin Releasing Hormone	Protein Coding	42	GC03P129974	11.63	https://www.genecards.org/cgi-bin/carddisp.pl?gene=TRH															GGTLC3
																		NDUFA10	NADH:Ubiquinone Oxidoreductase Subunit A10	Protein Coding	44	GC02M239893	11.63	https://www.genecards.org/cgi-bin/carddisp.pl?gene=NDUFA10															GH1
																		ECHS1	Enoyl-CoA Hydratase, Short Chain 1	Protein Coding	47	GC10M133362	11.62	https://www.genecards.org/cgi-bin/carddisp.pl?gene=ECHS1															GHR
																		TFRC	Transferrin Receptor	Protein Coding	48	GC03M196027	11.62	https://www.genecards.org/cgi-bin/carddisp.pl?gene=TFRC															GHRH
																		G6PD	Glucose-6-Phosphate Dehydrogenase	Protein Coding	50	GC0XM154531	11.61	https://www.genecards.org/cgi-bin/carddisp.pl?gene=G6PD															GHRL
																		SGCG	Sarcoglycan Gamma	Protein Coding	42	GC13P023160	11.6	https://www.genecards.org/cgi-bin/carddisp.pl?gene=SGCG															GHSR
																		ERBB3	Erb-B2 Receptor Tyrosine Kinase 3	Protein Coding	54	GC12P056094	11.57	https://www.genecards.org/cgi-bin/carddisp.pl?gene=ERBB3															GIPC1
																		SLC8A1	Solute Carrier Family 8 Member A1	Protein Coding	44	GC02M040078	11.56	https://www.genecards.org/cgi-bin/carddisp.pl?gene=SLC8A1															GIPR
																		SIX3	SIX Homeobox 3	Protein Coding	42	GC02P044941	11.54	https://www.genecards.org/cgi-bin/carddisp.pl?gene=SIX3															GJA1
																		PTCH1	Patched 1	Protein Coding	50	GC09M095442	11.52	https://www.genecards.org/cgi-bin/carddisp.pl?gene=PTCH1															GJA5
																		PTEN	Phosphatase And Tensin Homolog	Protein Coding	52	GC10P087863	11.51	https://www.genecards.org/cgi-bin/carddisp.pl?gene=PTEN															GJB2
																		MYC	MYC Proto-Oncogene, BHLH Transcription Factor	Protein Coding	51	GC08P127735	11.5	https://www.genecards.org/cgi-bin/carddisp.pl?gene=MYC															GK
																		NPHS1	NPHS1 Adhesion Molecule, Nephrin	Protein Coding	45	GC19M035825	11.48	https://www.genecards.org/cgi-bin/carddisp.pl?gene=NPHS1															GLA
																		PRODH	Proline Dehydrogenase 1	Protein Coding	45	GC22M018912	11.46	https://www.genecards.org/cgi-bin/carddisp.pl?gene=PRODH															GLB1
																		MIR486-1	MicroRNA 486-1	RNA Gene	16	GC08M041660	11.45	https://www.genecards.org/cgi-bin/carddisp.pl?gene=MIR486-1															GLDC
																		ETFA	Electron Transfer Flavoprotein Subunit Alpha	Protein Coding	45	GC15M076215	11.45	https://www.genecards.org/cgi-bin/carddisp.pl?gene=ETFA															GLI2
																		PGM1	Phosphoglucomutase 1	Protein Coding	48	GC01P063593	11.45	https://www.genecards.org/cgi-bin/carddisp.pl?gene=PGM1															GLIS3
																		PDE6B	Phosphodiesterase 6B	Protein Coding	45	GC04P000587	11.44	https://www.genecards.org/cgi-bin/carddisp.pl?gene=PDE6B															GLM1
																		AGK	Acylglycerol Kinase	Protein Coding	41	GC07P141551	11.43	https://www.genecards.org/cgi-bin/carddisp.pl?gene=AGK															GLO1
																		BLM	BLM RecQ Like Helicase	Protein Coding	48	GC15P090717	11.41	https://www.genecards.org/cgi-bin/carddisp.pl?gene=BLM															GLP1R
																		LEPQTL1	Leptin, Serum Levels Of	Genetic Locus	3	GC02U903086	11.41	https://www.genecards.org/cgi-bin/carddisp.pl?gene=LEPQTL1															GLRX5
																		CDH5	Cadherin 5	Protein Coding	47	GC16P066366	11.4	https://www.genecards.org/cgi-bin/carddisp.pl?gene=CDH5															GLUD1
																		PTS	6-Pyruvoyltetrahydropterin Synthase	Protein Coding	47	GC11P112226	11.39	https://www.genecards.org/cgi-bin/carddisp.pl?gene=PTS															GLUT2
																		HERC2	HECT And RLD Domain Containing E3 Ubiquitin Protein Ligase 2	Protein Coding	45	GC15M028111	11.38	https://www.genecards.org/cgi-bin/carddisp.pl?gene=HERC2															GNAI2
																		GPR101	G Protein-Coupled Receptor 101	Protein Coding	39	GC0XM137030	11.35	https://www.genecards.org/cgi-bin/carddisp.pl?gene=GPR101															GNAS
																		FASTKD2	FAST Kinase Domains 2	Protein Coding	38	GC02P206766	11.35	https://www.genecards.org/cgi-bin/carddisp.pl?gene=FASTKD2															GNAS-AS1
																		UCP2	Uncoupling Protein 2	Protein Coding	45	GC11M073974	11.33	https://www.genecards.org/cgi-bin/carddisp.pl?gene=UCP2															GNB3
																		RPE65	Retinoid Isomerohydrolase RPE65	Protein Coding	44	GC01M068428	11.33	https://www.genecards.org/cgi-bin/carddisp.pl?gene=RPE65															GNRH1
																		NDUFA12	NADH:Ubiquinone Oxidoreductase Subunit A12	Protein Coding	44	GC12M094898	11.33	https://www.genecards.org/cgi-bin/carddisp.pl?gene=NDUFA12															GNRHR
																		NDUFA9	NADH:Ubiquinone Oxidoreductase Subunit A9	Protein Coding	43	GC12P004649	11.33	https://www.genecards.org/cgi-bin/carddisp.pl?gene=NDUFA9															GOT2
																		SOX9	SRY-Box Transcription Factor 9	Protein Coding	47	GC17P072121	11.32	https://www.genecards.org/cgi-bin/carddisp.pl?gene=SOX9															GPAT3
																		FGF8	Fibroblast Growth Factor 8	Protein Coding	47	GC10M101770	11.32	https://www.genecards.org/cgi-bin/carddisp.pl?gene=FGF8															GPBAR1
																		PCSK2	Proprotein Convertase Subtilisin/Kexin Type 2	Protein Coding	41	GC20P017226	11.31	https://www.genecards.org/cgi-bin/carddisp.pl?gene=PCSK2															GPC3
																		PCSK9	Proprotein Convertase Subtilisin/Kexin Type 9	Protein Coding	51	GC01P055039	11.29	https://www.genecards.org/cgi-bin/carddisp.pl?gene=PCSK9															GPD2
																		RPS6KB1	Ribosomal Protein S6 Kinase B1	Protein Coding	49	GC17P059893	11.29	https://www.genecards.org/cgi-bin/carddisp.pl?gene=RPS6KB1															GPR101
																		CD1C	CD1c Molecule	Protein Coding	39	GC01P158289	11.28	https://www.genecards.org/cgi-bin/carddisp.pl?gene=CD1C															GPT
																		DDX41	DEAD-Box Helicase 41	Protein Coding	43	GC05M177511	11.27	https://www.genecards.org/cgi-bin/carddisp.pl?gene=DDX41															GPX1
																		HTR2A	5-Hydroxytryptamine Receptor 2A	Protein Coding	47	GC13M046831	11.27	https://www.genecards.org/cgi-bin/carddisp.pl?gene=HTR2A															GPX3
																		PLEC	Plectin	Protein Coding	42	GC08M143916	11.26	https://www.genecards.org/cgi-bin/carddisp.pl?gene=PLEC															GRAP2
																		NAGA	Alpha-N-Acetylgalactosaminidase	Protein Coding	43	GC22M042058	11.21	https://www.genecards.org/cgi-bin/carddisp.pl?gene=NAGA															GRB10
																		CCND1	Cyclin D1	Protein Coding	52	GC11P069641	11.21	https://www.genecards.org/cgi-bin/carddisp.pl?gene=CCND1															GRK2
																		MIR142	MicroRNA 142	RNA Gene	20	GC17M058331	11.19	https://www.genecards.org/cgi-bin/carddisp.pl?gene=MIR142															GSDMD
																		CD28	CD28 Molecule	Protein Coding	47	GC02P203706	11.19	https://www.genecards.org/cgi-bin/carddisp.pl?gene=CD28															GSK3B
																		PNLIP	Pancreatic Lipase	Protein Coding	47	GC10P116545	11.17	https://www.genecards.org/cgi-bin/carddisp.pl?gene=PNLIP															GSN
																		IARS2	Isoleucyl-TRNA Synthetase 2, Mitochondrial	Protein Coding	41	GC01P220094	11.15	https://www.genecards.org/cgi-bin/carddisp.pl?gene=IARS2															GSR
																		MKRN3	Makorin Ring Finger Protein 3	Protein Coding	39	GC15P024594	11.15	https://www.genecards.org/cgi-bin/carddisp.pl?gene=MKRN3															GSTM1
																		NDUFB10	NADH:Ubiquinone Oxidoreductase Subunit B10	Protein Coding	41	GC16P002430	11.12	https://www.genecards.org/cgi-bin/carddisp.pl?gene=NDUFB10															GTF2I
																		PDE11A	Phosphodiesterase 11A	Protein Coding	46	GC02M177624	11.11	https://www.genecards.org/cgi-bin/carddisp.pl?gene=PDE11A															GTF2IRD1
																		COA3	Cytochrome C Oxidase Assembly Factor 3	Protein Coding	34	GC17M042795	11.11	https://www.genecards.org/cgi-bin/carddisp.pl?gene=COA3															GTPBP3
																		HSP90AA1	Heat Shock Protein 90 Alpha Family Class A Member 1	Protein Coding	48	GC14M102080	11.11	https://www.genecards.org/cgi-bin/carddisp.pl?gene=HSP90AA1															GUCA1A
																		CXCL12	C-X-C Motif Chemokine Ligand 12	Protein Coding	45	GC10M044294	11.09	https://www.genecards.org/cgi-bin/carddisp.pl?gene=CXCL12															GUSB
																		TNFRSF25	TNF Receptor Superfamily Member 25	Protein Coding	43	GC01M006460	11.09	https://www.genecards.org/cgi-bin/carddisp.pl?gene=TNFRSF25															GYG1
																		PEX1	Peroxisomal Biogenesis Factor 1	Protein Coding	44	GC07M092487	11.07	https://www.genecards.org/cgi-bin/carddisp.pl?gene=PEX1															GYS1
																		ANXA5	Annexin A5	Protein Coding	46	GC04M121667	11.06	https://www.genecards.org/cgi-bin/carddisp.pl?gene=ANXA5															GZMB
																		ATP7B	ATPase Copper Transporting Beta	Protein Coding	47	GC13M051930	11.05	https://www.genecards.org/cgi-bin/carddisp.pl?gene=ATP7B															H19
																		UBR1	Ubiquitin Protein Ligase E3 Component N-Recognin 1	Protein Coding	43	GC15M042942	11.04	https://www.genecards.org/cgi-bin/carddisp.pl?gene=UBR1															H2AC18
																		F9	Coagulation Factor IX	Protein Coding	46	GC0XP139530	11.03	https://www.genecards.org/cgi-bin/carddisp.pl?gene=F9															HADH
																		IDUA	Alpha-L-Iduronidase	Protein Coding	42	GC04P000986	11.02	https://www.genecards.org/cgi-bin/carddisp.pl?gene=IDUA															HADHA
																		MIR675	MicroRNA 675	RNA Gene	17	GC11M001997	10.92	https://www.genecards.org/cgi-bin/carddisp.pl?gene=MIR675															HADHB
																		IL15	Interleukin 15	Protein Coding	40	GC04P141636	10.91	https://www.genecards.org/cgi-bin/carddisp.pl?gene=IL15															HAMP
																		SERPINA1	Serpin Family A Member 1	Protein Coding	49	GC14M094376	10.91	https://www.genecards.org/cgi-bin/carddisp.pl?gene=SERPINA1															HAND2
																		HMOX2	Heme Oxygenase 2	Protein Coding	47	GC16P004474	10.88	https://www.genecards.org/cgi-bin/carddisp.pl?gene=HMOX2															HARS1
																		CSF2	Colony Stimulating Factor 2	Protein Coding	44	GC05P132073	10.87	https://www.genecards.org/cgi-bin/carddisp.pl?gene=CSF2															HB1
																		RRAD	RRAD, Ras Related Glycolysis Inhibitor And Calcium Channel Regulator	Protein Coding	39	GC16M066925	10.87	https://www.genecards.org/cgi-bin/carddisp.pl?gene=RRAD															HBA1
																		CYP27B1	Cytochrome P450 Family 27 Subfamily B Member 1	Protein Coding	47	GC12M057757	10.83	https://www.genecards.org/cgi-bin/carddisp.pl?gene=CYP27B1															HBA2
																		ITGA4	Integrin Subunit Alpha 4	Protein Coding	48	GC02P181456	10.83	https://www.genecards.org/cgi-bin/carddisp.pl?gene=ITGA4															HBB
																		PET117	PET117 Cytochrome C Oxidase Chaperone	Protein Coding	29	GC20P018119	10.82	https://www.genecards.org/cgi-bin/carddisp.pl?gene=PET117															HBS1L
																		HSD11B2	Hydroxysteroid 11-Beta Dehydrogenase 2	Protein Coding	45	GC16P067433	10.8	https://www.genecards.org/cgi-bin/carddisp.pl?gene=HSD11B2															HCCS
																		CDK4	Cyclin Dependent Kinase 4	Protein Coding	54	GC12M057743	10.78	https://www.genecards.org/cgi-bin/carddisp.pl?gene=CDK4															HCN4
																		LGALS3	Galectin 3	Protein Coding	44	GC14P055124	10.78	https://www.genecards.org/cgi-bin/carddisp.pl?gene=LGALS3															HDAC3
																		ATP2A1	ATPase Sarcoplasmic/Endoplasmic Reticulum Ca2+ Transporting 1	Protein Coding	48	GC16P029020	10.76	https://www.genecards.org/cgi-bin/carddisp.pl?gene=ATP2A1															HDAC9
																		CD34	CD34 Molecule	Protein Coding	43	GC01M207880	10.75	https://www.genecards.org/cgi-bin/carddisp.pl?gene=CD34															HDLCQ12
																		MIR342	MicroRNA 342	RNA Gene	19	GC14P100109	10.71	https://www.genecards.org/cgi-bin/carddisp.pl?gene=MIR342															HELLS
																		FST	Follistatin	Protein Coding	46	GC05P053480	10.71	https://www.genecards.org/cgi-bin/carddisp.pl?gene=FST															HEPH
																		IDH2	Isocitrate Dehydrogenase (NADP(+)) 2	Protein Coding	52	GC15M090083	10.69	https://www.genecards.org/cgi-bin/carddisp.pl?gene=IDH2															HERC2
																		VTN	Vitronectin	Protein Coding	44	GC17M029955	10.67	https://www.genecards.org/cgi-bin/carddisp.pl?gene=VTN															HESX1
																		CHKB	Choline Kinase Beta	Protein Coding	45	GC22M050578	10.67	https://www.genecards.org/cgi-bin/carddisp.pl?gene=CHKB															HFE
																		FANCB	FA Complementation Group B	Protein Coding	40	GC0XM014690	10.63	https://www.genecards.org/cgi-bin/carddisp.pl?gene=FANCB															HFE1
																		PRTN3	Proteinase 3	Protein Coding	44	GC19P000840	10.6	https://www.genecards.org/cgi-bin/carddisp.pl?gene=PRTN3															HGF
																		RBCK1	RANBP2-Type And C3HC4-Type Zinc Finger Containing 1	Protein Coding	43	GC20P000407	10.6	https://www.genecards.org/cgi-bin/carddisp.pl?gene=RBCK1															HGPS
																		CYP17A1	Cytochrome P450 Family 17 Subfamily A Member 1	Protein Coding	48	GC10M102830	10.6	https://www.genecards.org/cgi-bin/carddisp.pl?gene=CYP17A1															HGSNAT
																		COMT	Catechol-O-Methyltransferase	Protein Coding	51	GC22P019941	10.6	https://www.genecards.org/cgi-bin/carddisp.pl?gene=COMT															HHF1
																		SDCCAG8	SHH Signaling And Ciliogenesis Regulator SDCCAG8	Protein Coding	41	GC01P243255	10.59	https://www.genecards.org/cgi-bin/carddisp.pl?gene=SDCCAG8															HHF2
																		MC2R	Melanocortin 2 Receptor	Protein Coding	47	GC18M017331	10.58	https://www.genecards.org/cgi-bin/carddisp.pl?gene=MC2R															HHF3
																		ARMC5	Armadillo Repeat Containing 5	Protein Coding	37	GC16P031576	10.58	https://www.genecards.org/cgi-bin/carddisp.pl?gene=ARMC5															HHF5
																		AOC3	Amine Oxidase Copper Containing 3	Protein Coding	44	GC17P042851	10.57	https://www.genecards.org/cgi-bin/carddisp.pl?gene=AOC3															Hic2
																		RAC1	Rac Family Small GTPase 1	Protein Coding	49	GC07P006380	10.57	https://www.genecards.org/cgi-bin/carddisp.pl?gene=RAC1															HIF1A
																		RNASEH2C	Ribonuclease H2 Subunit C	Protein Coding	39	GC11M065714	10.56	https://www.genecards.org/cgi-bin/carddisp.pl?gene=RNASEH2C															HIHGHH
																		RNASEH2B	Ribonuclease H2 Subunit B	Protein Coding	37	GC13P050909	10.56	https://www.genecards.org/cgi-bin/carddisp.pl?gene=RNASEH2B															HJV
																		NOX4	NADPH Oxidase 4	Protein Coding	42	GC11M089324	10.56	https://www.genecards.org/cgi-bin/carddisp.pl?gene=NOX4															Hk2
																		IL6R	Interleukin 6 Receptor	Protein Coding	48	GC01P154405	10.56	https://www.genecards.org/cgi-bin/carddisp.pl?gene=IL6R															HL
																		SLC11A2	Solute Carrier Family 11 Member 2	Protein Coding	47	GC12M050952	10.55	https://www.genecards.org/cgi-bin/carddisp.pl?gene=SLC11A2															HLA-A
																		LRBA	LPS Responsive Beige-Like Anchor Protein	Protein Coding	41	GC04M150264	10.54	https://www.genecards.org/cgi-bin/carddisp.pl?gene=LRBA															HLA-B
																		F3	Coagulation Factor III, Tissue Factor	Protein Coding	45	GC01M094530	10.54	https://www.genecards.org/cgi-bin/carddisp.pl?gene=F3															HLA-C
																		CTNNA1	Catenin Alpha 1	Protein Coding	47	GC05P138613	10.54	https://www.genecards.org/cgi-bin/carddisp.pl?gene=CTNNA1															HLA-DMA
																		LEMD3	LEM Domain Containing 3	Protein Coding	41	GC12P065169	10.52	https://www.genecards.org/cgi-bin/carddisp.pl?gene=LEMD3															HLA-DPA1
																		CD68	CD68 Molecule	Protein Coding	40	GC17P007579	10.52	https://www.genecards.org/cgi-bin/carddisp.pl?gene=CD68															HLA-DPB1
																		FRDA2	Friedreich Ataxia 2	Genetic Locus	3	GC09U900572	10.51	https://www.genecards.org/cgi-bin/carddisp.pl?gene=FRDA2															HLA-DQA1
																		OPRM1	Opioid Receptor Mu 1	Protein Coding	48	GC06P154075	10.51	https://www.genecards.org/cgi-bin/carddisp.pl?gene=OPRM1															HLA-DQB1
																		GHRH	Growth Hormone Releasing Hormone	Protein Coding	40	GC20M037251	10.5	https://www.genecards.org/cgi-bin/carddisp.pl?gene=GHRH															HLA-DRA
																		STK11	Serine/Threonine Kinase 11	Protein Coding	49	GC19P001177	10.5	https://www.genecards.org/cgi-bin/carddisp.pl?gene=STK11															HLA-DRB1
																		FUZ	Fuzzy Planar Cell Polarity Protein	Protein Coding	39	GC19M049806	10.48	https://www.genecards.org/cgi-bin/carddisp.pl?gene=FUZ															HLA-DRB3
																		GIPR	Gastric Inhibitory Polypeptide Receptor	Protein Coding	44	GC19P045668	10.48	https://www.genecards.org/cgi-bin/carddisp.pl?gene=GIPR															HLA-DRB4
																		EDNRB	Endothelin Receptor Type B	Protein Coding	49	GC13M077895	10.46	https://www.genecards.org/cgi-bin/carddisp.pl?gene=EDNRB															HLA-G
																		TBX5	T-Box Transcription Factor 5	Protein Coding	45	GC12M114353	10.46	https://www.genecards.org/cgi-bin/carddisp.pl?gene=TBX5															HLA-H
																		PRKCE	Protein Kinase C Epsilon	Protein Coding	50	GC02P045651	10.45	https://www.genecards.org/cgi-bin/carddisp.pl?gene=PRKCE															HMERF
																		MT-TL2	Mitochondrially Encoded TRNA-Leu (CUN) 2	RNA Gene	13	GCMTP012268	10.45	https://www.genecards.org/cgi-bin/carddisp.pl?gene=MT-TL2															HMGA1
																		HSPA8	Heat Shock Protein Family A (Hsp70) Member 8	Protein Coding	47	GC11M123057	10.43	https://www.genecards.org/cgi-bin/carddisp.pl?gene=HSPA8															HMGB1
																		KLF1	Kruppel Like Factor 1	Protein Coding	44	GC19M012884	10.42	https://www.genecards.org/cgi-bin/carddisp.pl?gene=KLF1															HMGCL
																		DIO2	Iodothyronine Deiodinase 2	Protein Coding	40	GC14M080197	10.42	https://www.genecards.org/cgi-bin/carddisp.pl?gene=DIO2															HMGCR
																		PEX5	Peroxisomal Biogenesis Factor 5	Protein Coding	42	GC12P008247	10.41	https://www.genecards.org/cgi-bin/carddisp.pl?gene=PEX5															Hmgcs2
																		TNNT1	Troponin T1, Slow Skeletal Type	Protein Coding	43	GC19M055132	10.4	https://www.genecards.org/cgi-bin/carddisp.pl?gene=TNNT1															HMGIY
																		MYH7B	Myosin Heavy Chain 7B	Protein Coding	39	GC20P034956	10.4	https://www.genecards.org/cgi-bin/carddisp.pl?gene=MYH7B															HMOX1
																		MET	MET Proto-Oncogene, Receptor Tyrosine Kinase	Protein Coding	54	GC07P116672	10.4	https://www.genecards.org/cgi-bin/carddisp.pl?gene=MET															HMOX2
																		ERBB2	Erb-B2 Receptor Tyrosine Kinase 2	Protein Coding	54	GC17P039687	10.35	https://www.genecards.org/cgi-bin/carddisp.pl?gene=ERBB2															HNF1A
																		PEX6	Peroxisomal Biogenesis Factor 6	Protein Coding	43	GC06M042963	10.34	https://www.genecards.org/cgi-bin/carddisp.pl?gene=PEX6															HNF1B
																		PDHA1	Pyruvate Dehydrogenase E1 Subunit Alpha 1	Protein Coding	48	GC0XP019343	10.33	https://www.genecards.org/cgi-bin/carddisp.pl?gene=PDHA1															HNF2
																		AR	Androgen Receptor	Protein Coding	53	GC0XP067544	10.31	https://www.genecards.org/cgi-bin/carddisp.pl?gene=AR															HNF4A
																		RAD51	RAD51 Recombinase	Protein Coding	52	GC15P040694	10.29	https://www.genecards.org/cgi-bin/carddisp.pl?gene=RAD51															HNRNPA1
																		MIR125A	MicroRNA 125a	RNA Gene	21	GC19P051720	10.29	https://www.genecards.org/cgi-bin/carddisp.pl?gene=MIR125A															HNRNPA2B1
																		MIR423	MicroRNA 423	RNA Gene	18	GC17P030117	10.29	https://www.genecards.org/cgi-bin/carddisp.pl?gene=MIR423															HNRNPUL2-BSCL2
																		FHOD3	Formin Homology 2 Domain Containing 3	Protein Coding	37	GC18P036297	10.28	https://www.genecards.org/cgi-bin/carddisp.pl?gene=FHOD3															HP
																		DNAAF3	Dynein Axonemal Assembly Factor 3	Protein Coding	36	GC19M055158	10.28	https://www.genecards.org/cgi-bin/carddisp.pl?gene=DNAAF3															HPC11
																		SHC1	SHC Adaptor Protein 1	Protein Coding	45	GC01M154962	10.27	https://www.genecards.org/cgi-bin/carddisp.pl?gene=SHC1															HRAS
																		MIR22	MicroRNA 22	RNA Gene	20	GC17M001713	10.26	https://www.genecards.org/cgi-bin/carddisp.pl?gene=MIR22															HRC
																		GGT2	Gamma-Glutamyltransferase 2	Protein Coding	31	GC22M021207	10.22	https://www.genecards.org/cgi-bin/carddisp.pl?gene=GGT2															HSD11B1
																		ABCA4	ATP Binding Cassette Subfamily A Member 4	Protein Coding	44	GC01M093992	10.2	https://www.genecards.org/cgi-bin/carddisp.pl?gene=ABCA4															HSD11B2
																		LPA	Lipoprotein(A)	Protein Coding	41	GC06M160531	10.19	https://www.genecards.org/cgi-bin/carddisp.pl?gene=LPA															HSD17B10
																		NPPC	Natriuretic Peptide C	Protein Coding	40	GC02M231921	10.16	https://www.genecards.org/cgi-bin/carddisp.pl?gene=NPPC															HSF
																		NPC1	NPC Intracellular Cholesterol Transporter 1	Protein Coding	47	GC18M023506	10.14	https://www.genecards.org/cgi-bin/carddisp.pl?gene=NPC1															HSP90AA1
																		ERCC6	ERCC Excision Repair 6, Chromatin Remodeling Factor	Protein Coding	45	GC10M049454	10.13	https://www.genecards.org/cgi-bin/carddisp.pl?gene=ERCC6															HSPA1A
																		MYO7A	Myosin VIIA	Protein Coding	42	GC11P077128	10.12	https://www.genecards.org/cgi-bin/carddisp.pl?gene=MYO7A															HSPA1B
																		SOX2	SRY-Box Transcription Factor 2	Protein Coding	47	GC03P181711	10.1	https://www.genecards.org/cgi-bin/carddisp.pl?gene=SOX2															HSPA4
																		FIG4	FIG4 Phosphoinositide 5-Phosphatase	Protein Coding	43	GC06P109691	10.06	https://www.genecards.org/cgi-bin/carddisp.pl?gene=FIG4															HSPA5
																		TK2	Thymidine Kinase 2	Protein Coding	42	GC16M066508	10.04	https://www.genecards.org/cgi-bin/carddisp.pl?gene=TK2															HSPA8
																		CHRM2	Cholinergic Receptor Muscarinic 2	Protein Coding	48	GC07P136868	10.04	https://www.genecards.org/cgi-bin/carddisp.pl?gene=CHRM2															HSPA9
																		PIK3CG	Phosphatidylinositol-4,5-Bisphosphate 3-Kinase Catalytic Subunit Gamma	Protein Coding	48	GC07P106865	10.02	https://www.genecards.org/cgi-bin/carddisp.pl?gene=PIK3CG															HSPB8
																		RLBP1	Retinaldehyde Binding Protein 1	Protein Coding	44	GC15M089209	10.01	https://www.genecards.org/cgi-bin/carddisp.pl?gene=RLBP1															HSPD1
																		BAIAP2L1	BAR/IMD Domain Containing Adaptor Protein 2 Like 1	Protein Coding	37	GC07M098294	9.98	https://www.genecards.org/cgi-bin/carddisp.pl?gene=BAIAP2L1															HTR1A
																		PALB2	Partner And Localizer Of BRCA2	Protein Coding	43	GC16M023603	9.97	https://www.genecards.org/cgi-bin/carddisp.pl?gene=PALB2															HTR2A
																		MLN	Motilin	Protein Coding	35	GC06M033794	9.96	https://www.genecards.org/cgi-bin/carddisp.pl?gene=MLN															HTT
																		FAH	Fumarylacetoacetate Hydrolase	Protein Coding	47	GC15P080152	9.95	https://www.genecards.org/cgi-bin/carddisp.pl?gene=FAH															HUWE1
																		XDH	Xanthine Dehydrogenase	Protein Coding	47	GC02M031294	9.94	https://www.genecards.org/cgi-bin/carddisp.pl?gene=XDH															HYMAI
																		CLN3	CLN3 Lysosomal/Endosomal Transmembrane Protein, Battenin	Protein Coding	43	GC16M028466	9.92	https://www.genecards.org/cgi-bin/carddisp.pl?gene=CLN3															IAPP
																		LMNB1	Lamin B1	Protein Coding	47	GC05P126776	9.9	https://www.genecards.org/cgi-bin/carddisp.pl?gene=LMNB1															IARS2
																		SCD	Stearoyl-CoA Desaturase	Protein Coding	48	GC10P100347	9.9	https://www.genecards.org/cgi-bin/carddisp.pl?gene=SCD															IB1
																		PDE6A	Phosphodiesterase 6A	Protein Coding	47	GC05M149857	9.86	https://www.genecards.org/cgi-bin/carddisp.pl?gene=PDE6A															ICAM1
																		GGTLC3	Gamma-Glutamyltransferase Light Chain Family Member 3	Protein Coding	20	GC22M018516	9.85	https://www.genecards.org/cgi-bin/carddisp.pl?gene=GGTLC3															ICH
																		RHOA	Ras Homolog Family Member A	Protein Coding	46	GC03M049359	9.79	https://www.genecards.org/cgi-bin/carddisp.pl?gene=RHOA															ICOSLG
																		MEF2C	Myocyte Enhancer Factor 2C	Protein Coding	48	GC05M088718	9.79	https://www.genecards.org/cgi-bin/carddisp.pl?gene=MEF2C															IDDM1
																		LOX	Lysyl Oxidase	Protein Coding	44	GC05M122063	9.77	https://www.genecards.org/cgi-bin/carddisp.pl?gene=LOX															IDDM10
																		ABHD5	Abhydrolase Domain Containing 5, Lysophosphatidic Acid Acyltransferase	Protein Coding	45	GC03P043707	9.75	https://www.genecards.org/cgi-bin/carddisp.pl?gene=ABHD5															IDDM11
																		SCARB1	Scavenger Receptor Class B Member 1	Protein Coding	45	GC12M124776	9.74	https://www.genecards.org/cgi-bin/carddisp.pl?gene=SCARB1															IDDM12
																		DNAJC21	DnaJ Heat Shock Protein Family (Hsp40) Member C21	Protein Coding	35	GC05P034929	9.73	https://www.genecards.org/cgi-bin/carddisp.pl?gene=DNAJC21															IDDM13
																		PTPA	Protein Phosphatase 2 Phosphatase Activator	Protein Coding	35	GC09P129111	9.72	https://www.genecards.org/cgi-bin/carddisp.pl?gene=PTPA															IDDM15
																		ITGA7	Integrin Subunit Alpha 7	Protein Coding	47	GC12M055684	9.65	https://www.genecards.org/cgi-bin/carddisp.pl?gene=ITGA7															IDDM17
																		RNU4ATAC	RNA, U4atac Small Nuclear (U12-Dependent Splicing)	RNA Gene	20	GC02P121532	9.65	https://www.genecards.org/cgi-bin/carddisp.pl?gene=RNU4ATAC															IDDM18
																		CDH23	Cadherin Related 23	Protein Coding	41	GC10P071396	9.64	https://www.genecards.org/cgi-bin/carddisp.pl?gene=CDH23															IDDM19
																		TTC7A	Tetratricopeptide Repeat Domain 7A	Protein Coding	38	GC02P046906	9.62	https://www.genecards.org/cgi-bin/carddisp.pl?gene=TTC7A															IDDM2
																		ARG1	Arginase 1	Protein Coding	50	GC06P131473	9.61	https://www.genecards.org/cgi-bin/carddisp.pl?gene=ARG1															IDDM20
																		PRPH2	Peripherin 2	Protein Coding	39	GC06M043145	9.61	https://www.genecards.org/cgi-bin/carddisp.pl?gene=PRPH2															IDDM21
																		SMC1A	Structural Maintenance Of Chromosomes 1A	Protein Coding	45	GC0XM053374	9.6	https://www.genecards.org/cgi-bin/carddisp.pl?gene=SMC1A															IDDM22
																		SOCS3	Suppressor Of Cytokine Signaling 3	Protein Coding	44	GC17M078356	9.58	https://www.genecards.org/cgi-bin/carddisp.pl?gene=SOCS3															IDDM23
																		MLX	MAX Dimerization Protein MLX	Protein Coding	43	GC17P042567	9.58	https://www.genecards.org/cgi-bin/carddisp.pl?gene=MLX															IDDM24
																		GLRX5	Glutaredoxin 5	Protein Coding	40	GC14P095533	9.58	https://www.genecards.org/cgi-bin/carddisp.pl?gene=GLRX5															IDDM3
																		IGHV4-38-2	Immunoglobulin Heavy Variable 4-38-2	Protein Coding	8	GC14U901616	9.58	https://www.genecards.org/cgi-bin/carddisp.pl?gene=IGHV4-38-2															IDDM4
																		TNFSF11	TNF Superfamily Member 11	Protein Coding	47	GC13P042562	9.57	https://www.genecards.org/cgi-bin/carddisp.pl?gene=TNFSF11															IDDM5
																		MIR196A1	MicroRNA 196a-1	RNA Gene	19	GC17M048632	9.55	https://www.genecards.org/cgi-bin/carddisp.pl?gene=MIR196A1															IDDM6
																		PDGFB	Platelet Derived Growth Factor Subunit B	Protein Coding	50	GC22M045657	9.55	https://www.genecards.org/cgi-bin/carddisp.pl?gene=PDGFB															IDDM7
																		ITGB3	Integrin Subunit Beta 3	Protein Coding	49	GC17P047254	9.54	https://www.genecards.org/cgi-bin/carddisp.pl?gene=ITGB3															IDDM8
																		USF1	Upstream Transcription Factor 1	Protein Coding	43	GC01M161039	9.54	https://www.genecards.org/cgi-bin/carddisp.pl?gene=USF1															IDDMX
																		SERPINF2	Serpin Family F Member 2	Protein Coding	44	GC17P001742	9.52	https://www.genecards.org/cgi-bin/carddisp.pl?gene=SERPINF2															IDH1
																		ITGA1	Integrin Subunit Alpha 1	Protein Coding	41	GC05P052788	9.51	https://www.genecards.org/cgi-bin/carddisp.pl?gene=ITGA1															IDH2
																		GATA1	GATA Binding Protein 1	Protein Coding	46	GC0XP048786	9.5	https://www.genecards.org/cgi-bin/carddisp.pl?gene=GATA1															IDH3A
																		TP63	Tumor Protein P63	Protein Coding	48	GC03P189598	9.5	https://www.genecards.org/cgi-bin/carddisp.pl?gene=TP63															IDH3B
																		TPM2	Tropomyosin 2	Protein Coding	44	GC09M035672	9.5	https://www.genecards.org/cgi-bin/carddisp.pl?gene=TPM2															IDUA
																		SIRT2	Sirtuin 2	Protein Coding	48	GC19M038878	9.49	https://www.genecards.org/cgi-bin/carddisp.pl?gene=SIRT2															IER3IP1
																		PCCA	Propionyl-CoA Carboxylase Subunit Alpha	Protein Coding	45	GC13P100089	9.49	https://www.genecards.org/cgi-bin/carddisp.pl?gene=PCCA															IFIH1
																		ITGAV	Integrin Subunit Alpha V	Protein Coding	46	GC02P186589	9.49	https://www.genecards.org/cgi-bin/carddisp.pl?gene=ITGAV															IFNA1
																		GNRH1	Gonadotropin Releasing Hormone 1	Protein Coding	41	GC08M025419	9.48	https://www.genecards.org/cgi-bin/carddisp.pl?gene=GNRH1															IFNA2
																		RARRES2	Retinoic Acid Receptor Responder 2	Protein Coding	39	GC07M150333	9.48	https://www.genecards.org/cgi-bin/carddisp.pl?gene=RARRES2															IFNB1
																		PBX1	PBX Homeobox 1	Protein Coding	49	GC01P164524	9.47	https://www.genecards.org/cgi-bin/carddisp.pl?gene=PBX1															IFNB2
																		MIR382	MicroRNA 382	RNA Gene	15	GC14P104799	9.47	https://www.genecards.org/cgi-bin/carddisp.pl?gene=MIR382															IFNG
																		PEX7	Peroxisomal Biogenesis Factor 7	Protein Coding	43	GC06P136822	9.46	https://www.genecards.org/cgi-bin/carddisp.pl?gene=PEX7															IFT140
																		NODAL	Nodal Growth Differentiation Factor	Protein Coding	42	GC10M070431	9.44	https://www.genecards.org/cgi-bin/carddisp.pl?gene=NODAL															IFT172
																		ADAR	Adenosine Deaminase RNA Specific	Protein Coding	44	GC01M154582	9.44	https://www.genecards.org/cgi-bin/carddisp.pl?gene=ADAR															IFT43
																		SERPINA6	Serpin Family A Member 6	Protein Coding	43	GC14M094341	9.44	https://www.genecards.org/cgi-bin/carddisp.pl?gene=SERPINA6															IFT80
																		TOMM40	Translocase Of Outer Mitochondrial Membrane 40	Protein Coding	40	GC19P044890	9.41	https://www.genecards.org/cgi-bin/carddisp.pl?gene=TOMM40															IGF1
																		FGA	Fibrinogen Alpha Chain	Protein Coding	47	GC04M154583	9.41	https://www.genecards.org/cgi-bin/carddisp.pl?gene=FGA															IGF1R
																		CD63	CD63 Molecule	Protein Coding	41	GC12M055725	9.4	https://www.genecards.org/cgi-bin/carddisp.pl?gene=CD63															IGF2
																		TMEM67	Transmembrane Protein 67	Protein Coding	37	GC08P093754	9.4	https://www.genecards.org/cgi-bin/carddisp.pl?gene=TMEM67															IGF2-AS
																		MC3R	Melanocortin 3 Receptor	Protein Coding	43	GC20P056248	9.39	https://www.genecards.org/cgi-bin/carddisp.pl?gene=MC3R															IGF2BP2
																		ACO1	Aconitase 1	Protein Coding	44	GC09P032374	9.38	https://www.genecards.org/cgi-bin/carddisp.pl?gene=ACO1															IGF2R
																		AGBL5	ATP/GTP Binding Protein Like 5	Protein Coding	39	GC02P027016	9.38	https://www.genecards.org/cgi-bin/carddisp.pl?gene=AGBL5															IGFBP1
																		PLAT	Plasminogen Activator, Tissue Type	Protein Coding	49	GC08M042174	9.37	https://www.genecards.org/cgi-bin/carddisp.pl?gene=PLAT															IGFBP2
																		GATA3	GATA Binding Protein 3	Protein Coding	49	GC10P008045	9.36	https://www.genecards.org/cgi-bin/carddisp.pl?gene=GATA3															IGFBP3
																		CKM	Creatine Kinase, M-Type	Protein Coding	44	GC19M045306	9.36	https://www.genecards.org/cgi-bin/carddisp.pl?gene=CKM															IGFBP7
																		RHOD	Ras Homolog Family Member D	Protein Coding	39	GC11P067057	9.35	https://www.genecards.org/cgi-bin/carddisp.pl?gene=RHOD															IGHV4-38-2
																		ROM1	Retinal Outer Segment Membrane Protein 1	Protein Coding	43	GC11P062611	9.34	https://www.genecards.org/cgi-bin/carddisp.pl?gene=ROM1															IKBKB
																		NRAP	Nebulin Related Anchoring Protein	Protein Coding	36	GC10M113588	9.33	https://www.genecards.org/cgi-bin/carddisp.pl?gene=NRAP															IL10
																		SIRT6	Sirtuin 6	Protein Coding	45	GC19M004174	9.33	https://www.genecards.org/cgi-bin/carddisp.pl?gene=SIRT6															IL12B
																		MAF	MAF BZIP Transcription Factor	Protein Coding	45	GC16M079204	9.33	https://www.genecards.org/cgi-bin/carddisp.pl?gene=MAF															IL13
																		TRIM37	Tripartite Motif Containing 37	Protein Coding	42	GC17M058982	9.32	https://www.genecards.org/cgi-bin/carddisp.pl?gene=TRIM37															IL15
																		SAMHD1	SAM And HD Domain Containing Deoxynucleoside Triphosphate Triphosphohydrolase 1	Protein Coding	43	GC20M036890	9.32	https://www.genecards.org/cgi-bin/carddisp.pl?gene=SAMHD1															IL17A
																		KCNJ2	Potassium Inwardly Rectifying Channel Subfamily J Member 2	Protein Coding	48	GC17P070168	9.31	https://www.genecards.org/cgi-bin/carddisp.pl?gene=KCNJ2															IL18
																		HLA-DRB4	Major Histocompatibility Complex, Class II, DR Beta 4	Protein Coding	30	GC06Mo03851	9.3	https://www.genecards.org/cgi-bin/carddisp.pl?gene=HLA-DRB4															IL1A
																		POSTN	Periostin	Protein Coding	43	GC13M037562	9.29	https://www.genecards.org/cgi-bin/carddisp.pl?gene=POSTN															IL1B
																		MIAT	Myocardial Infarction Associated Transcript	RNA Gene	23	GC22P026646	9.29	https://www.genecards.org/cgi-bin/carddisp.pl?gene=MIAT															IL1R1
																		GAS5	Growth Arrest Specific 5	RNA Gene	23	GC01M173947	9.28	https://www.genecards.org/cgi-bin/carddisp.pl?gene=GAS5															IL1RN
																		CREBBP	CREB Binding Protein	Protein Coding	52	GC16M003726	9.28	https://www.genecards.org/cgi-bin/carddisp.pl?gene=CREBBP															IL2
																		ITGA2	Integrin Subunit Alpha 2	Protein Coding	45	GC05P052989	9.25	https://www.genecards.org/cgi-bin/carddisp.pl?gene=ITGA2															IL2R
																		MAPK9	Mitogen-Activated Protein Kinase 9	Protein Coding	48	GC05M180234	9.24	https://www.genecards.org/cgi-bin/carddisp.pl?gene=MAPK9															IL2RA
																		SPTB	Spectrin Beta, Erythrocytic	Protein Coding	40	GC14M064746	9.24	https://www.genecards.org/cgi-bin/carddisp.pl?gene=SPTB															IL3
																		SIRT4	Sirtuin 4	Protein Coding	40	GC12P120291	9.24	https://www.genecards.org/cgi-bin/carddisp.pl?gene=SIRT4															IL4
																		TRMT112	TRNA Methyltransferase Subunit 11-2	Protein Coding	36	GC11M064316	9.22	https://www.genecards.org/cgi-bin/carddisp.pl?gene=TRMT112															IL5
																		XYLT2	Xylosyltransferase 2	Protein Coding	45	GC17P050347	9.18	https://www.genecards.org/cgi-bin/carddisp.pl?gene=XYLT2															IL6
																		RET	Ret Proto-Oncogene	Protein Coding	53	GC10P043081	9.16	https://www.genecards.org/cgi-bin/carddisp.pl?gene=RET															IL6R
																		ANO5	Anoctamin 5	Protein Coding	38	GC11P021799	9.15	https://www.genecards.org/cgi-bin/carddisp.pl?gene=ANO5															IL7R
																		TYMP	Thymidine Phosphorylase	Protein Coding	46	GC22M050525	9.14	https://www.genecards.org/cgi-bin/carddisp.pl?gene=TYMP															ILK
																		SCN1B	Sodium Voltage-Gated Channel Beta Subunit 1	Protein Coding	44	GC19P035030	9.14	https://www.genecards.org/cgi-bin/carddisp.pl?gene=SCN1B															IMD41
																		BECN1	Beclin 1	Protein Coding	46	GC17M042810	9.14	https://www.genecards.org/cgi-bin/carddisp.pl?gene=BECN1															IMP2
																		PROM1	Prominin 1	Protein Coding	44	GC04M015965	9.13	https://www.genecards.org/cgi-bin/carddisp.pl?gene=PROM1															Impa2
																		LBR	Lamin B Receptor	Protein Coding	47	GC01M225401	9.12	https://www.genecards.org/cgi-bin/carddisp.pl?gene=LBR															INPP5F
																		MRAP	Melanocortin 2 Receptor Accessory Protein	Protein Coding	37	GC21P032291	9.1	https://www.genecards.org/cgi-bin/carddisp.pl?gene=MRAP															INS
																		PLEK	Pleckstrin	Protein Coding	40	GC02P068365	9.08	https://www.genecards.org/cgi-bin/carddisp.pl?gene=PLEK															INSDM
																		SUN2	Sad1 And UNC84 Domain Containing 2	Protein Coding	37	GC22M045390	9.07	https://www.genecards.org/cgi-bin/carddisp.pl?gene=SUN2															INS-IGF2
																		HESX1	HESX Homeobox 1	Protein Coding	39	GC03M057207	9.07	https://www.genecards.org/cgi-bin/carddisp.pl?gene=HESX1															INSR
																		CACNB2	Calcium Voltage-Gated Channel Auxiliary Subunit Beta 2	Protein Coding	47	GC10P018165	9.06	https://www.genecards.org/cgi-bin/carddisp.pl?gene=CACNB2															IPF1
																		ANGPTL8	Angiopoietin Like 8	Protein Coding	28	GC19P011238	9.04	https://www.genecards.org/cgi-bin/carddisp.pl?gene=ANGPTL8															IPW
																		TNFRSF10A	TNF Receptor Superfamily Member 10a	Protein Coding	45	GC08M023190	9.02	https://www.genecards.org/cgi-bin/carddisp.pl?gene=TNFRSF10A															IQCB1
																		DGAT1	Diacylglycerol O-Acyltransferase 1	Protein Coding	47	GC08M144316	9.02	https://www.genecards.org/cgi-bin/carddisp.pl?gene=DGAT1															IREB2
																		IGF2-AS	IGF2 Antisense RNA	RNA Gene	24	GC11P002140	9.01	https://www.genecards.org/cgi-bin/carddisp.pl?gene=IGF2-AS															IRF3
																		PSMD4	Proteasome 26S Subunit, Non-ATPase 4	Protein Coding	44	GC01P151227	9.01	https://www.genecards.org/cgi-bin/carddisp.pl?gene=PSMD4															IRS1
																		SGSH	N-Sulfoglucosamine Sulfohydrolase	Protein Coding	44	GC17M080206	9	https://www.genecards.org/cgi-bin/carddisp.pl?gene=SGSH															IRS2
																		C3	Complement C3	Protein Coding	47	GC19M006677	8.98	https://www.genecards.org/cgi-bin/carddisp.pl?gene=C3															ISL1
																		OFD1	OFD1 Centriole And Centriolar Satellite Protein	Protein Coding	41	GC0XP013734	8.98	https://www.genecards.org/cgi-bin/carddisp.pl?gene=OFD1															ITGA1
																		CD79A	CD79a Molecule	Protein Coding	46	GC19P041877	8.95	https://www.genecards.org/cgi-bin/carddisp.pl?gene=CD79A															ITGA2
																		MIR28	MicroRNA 28	RNA Gene	19	GC03P188688	8.95	https://www.genecards.org/cgi-bin/carddisp.pl?gene=MIR28															ITGA2B
																		SPEG	Striated Muscle Enriched Protein Kinase	Protein Coding	41	GC02P219434	8.94	https://www.genecards.org/cgi-bin/carddisp.pl?gene=SPEG															ITGA4
																		XRCC2	X-Ray Repair Cross Complementing 2	Protein Coding	42	GC07M152644	8.94	https://www.genecards.org/cgi-bin/carddisp.pl?gene=XRCC2															ITGA5
																		CASP2	Caspase 2	Protein Coding	49	GC07P144979	8.91	https://www.genecards.org/cgi-bin/carddisp.pl?gene=CASP2															ITGA6
																		MIR214	MicroRNA 214	RNA Gene	20	GC01M172234	8.91	https://www.genecards.org/cgi-bin/carddisp.pl?gene=MIR214															ITGA7
																		APTX	Aprataxin	Protein Coding	44	GC09M032886	8.91	https://www.genecards.org/cgi-bin/carddisp.pl?gene=APTX															ITGA8
																		BCL2L1	BCL2 Like 1	Protein Coding	47	GC20M031664	8.9	https://www.genecards.org/cgi-bin/carddisp.pl?gene=BCL2L1															ITGA9
																		NEK8	NIMA Related Kinase 8	Protein Coding	41	GC17P028725	8.9	https://www.genecards.org/cgi-bin/carddisp.pl?gene=NEK8															ITGAM
																		PTGS2	Prostaglandin-Endoperoxide Synthase 2	Protein Coding	48	GC01M186640	8.88	https://www.genecards.org/cgi-bin/carddisp.pl?gene=PTGS2															ITGAV
																		SERAC1	Serine Active Site Containing 1	Protein Coding	36	GC06M158109	8.87	https://www.genecards.org/cgi-bin/carddisp.pl?gene=SERAC1															ITGB1
																		PKLR	Pyruvate Kinase L/R	Protein Coding	47	GC01M155289	8.87	https://www.genecards.org/cgi-bin/carddisp.pl?gene=PKLR															ITGB2
																		CASP7	Caspase 7	Protein Coding	50	GC10P113679	8.86	https://www.genecards.org/cgi-bin/carddisp.pl?gene=CASP7															ITGB3
																		GBA	Glucosylceramidase Beta	Protein Coding	47	GC01M155234	8.85	https://www.genecards.org/cgi-bin/carddisp.pl?gene=GBA															ITGB4
																		BAMBI	BMP And Activin Membrane Bound Inhibitor	Protein Coding	43	GC10P028685	8.84	https://www.genecards.org/cgi-bin/carddisp.pl?gene=BAMBI															ITGB6
																		NSD1	Nuclear Receptor Binding SET Domain Protein 1	Protein Coding	43	GC05P177134	8.83	https://www.genecards.org/cgi-bin/carddisp.pl?gene=NSD1															ITLN1
																		HLA-DPA1	Major Histocompatibility Complex, Class II, DP Alpha 1	Protein Coding	40	GC06M033064	8.82	https://www.genecards.org/cgi-bin/carddisp.pl?gene=HLA-DPA1															ITPR2
																		MIR15A	MicroRNA 15a	RNA Gene	16	GC13M050049	8.8	https://www.genecards.org/cgi-bin/carddisp.pl?gene=MIR15A															ITPR3
																		CD69	CD69 Molecule	Protein Coding	40	GC12M013857	8.8	https://www.genecards.org/cgi-bin/carddisp.pl?gene=CD69															JAG1
																		OTX2	Orthodenticle Homeobox 2	Protein Coding	45	GC14M056799	8.79	https://www.genecards.org/cgi-bin/carddisp.pl?gene=OTX2															JAK2
																		ABCB7	ATP Binding Cassette Subfamily B Member 7	Protein Coding	43	GC0XM075053	8.78	https://www.genecards.org/cgi-bin/carddisp.pl?gene=ABCB7															JAZF1
																		IPW	Imprinted In Prader-Willi Syndrome	RNA Gene	15	GC15P025116	8.78	https://www.genecards.org/cgi-bin/carddisp.pl?gene=IPW															JP2
																		ANK2	Ankyrin 2	Protein Coding	41	GC04P112706	8.78	https://www.genecards.org/cgi-bin/carddisp.pl?gene=ANK2															JPH2
																		FANCA	FA Complementation Group A	Protein Coding	48	GC16M089748	8.77	https://www.genecards.org/cgi-bin/carddisp.pl?gene=FANCA															JUN
																		MIR1-2	MicroRNA 1-2	RNA Gene	17	GC18M021828	8.76	https://www.genecards.org/cgi-bin/carddisp.pl?gene=MIR1-2															JUP
																		HLA-DRA	Major Histocompatibility Complex, Class II, DR Alpha	Protein Coding	47	GC06P032439	8.75	https://www.genecards.org/cgi-bin/carddisp.pl?gene=HLA-DRA															KCNA2
																		HLA-DRB3	Major Histocompatibility Complex, Class II, DR Beta 3	Protein Coding	28	GC06Mn03715	8.75	https://www.genecards.org/cgi-bin/carddisp.pl?gene=HLA-DRB3															KCND3
																		SIRT5	Sirtuin 5	Protein Coding	45	GC06P013574	8.75	https://www.genecards.org/cgi-bin/carddisp.pl?gene=SIRT5															KCNE1
																		MICA	MHC Class I Polypeptide-Related Sequence A	Protein Coding	39	GC06P031399	8.75	https://www.genecards.org/cgi-bin/carddisp.pl?gene=MICA															KCNE2
																		HARS1	Histidyl-TRNA Synthetase 1	Protein Coding	36	GC05M140673	8.74	https://www.genecards.org/cgi-bin/carddisp.pl?gene=HARS1															KCNH2
																		NOS1	Nitric Oxide Synthase 1	Protein Coding	49	GC12M117208	8.74	https://www.genecards.org/cgi-bin/carddisp.pl?gene=NOS1															KCNJ11
																		AMPD1	Adenosine Monophosphate Deaminase 1	Protein Coding	45	GC01M114673	8.73	https://www.genecards.org/cgi-bin/carddisp.pl?gene=AMPD1															KCNJ2
																		SIRT7	Sirtuin 7	Protein Coding	41	GC17M081911	8.71	https://www.genecards.org/cgi-bin/carddisp.pl?gene=SIRT7															KCNJ5
																		LIN9	Lin-9 DREAM MuvB Core Complex Component	Protein Coding	37	GC01M226231	8.71	https://www.genecards.org/cgi-bin/carddisp.pl?gene=LIN9															KCNJ8
																		IDH3B	Isocitrate Dehydrogenase (NAD(+)) 3 Non-Catalytic Subunit Beta	Protein Coding	45	GC20M002658	8.71	https://www.genecards.org/cgi-bin/carddisp.pl?gene=IDH3B															KCNQ1
																		PYGL	Glycogen Phosphorylase L	Protein Coding	48	GC14M050857	8.69	https://www.genecards.org/cgi-bin/carddisp.pl?gene=PYGL															KCNQ1OT1
																		TULP1	TUB Like Protein 1	Protein Coding	42	GC06M042216	8.67	https://www.genecards.org/cgi-bin/carddisp.pl?gene=TULP1															KDM4C
																		RPS27A	Ribosomal Protein S27a	Protein Coding	43	GC02P055231	8.67	https://www.genecards.org/cgi-bin/carddisp.pl?gene=RPS27A															KDR
																		SOX3	SRY-Box Transcription Factor 3	Protein Coding	44	GC0XM140502	8.66	https://www.genecards.org/cgi-bin/carddisp.pl?gene=SOX3															KEAP1
																		ITGA2B	Integrin Subunit Alpha 2b	Protein Coding	50	GC17M044388	8.65	https://www.genecards.org/cgi-bin/carddisp.pl?gene=ITGA2B															KIAA01613
																		ADAM17	ADAM Metallopeptidase Domain 17	Protein Coding	51	GC02M009488	8.63	https://www.genecards.org/cgi-bin/carddisp.pl?gene=ADAM17															KIAA0603
																		THBS1	Thrombospondin 1	Protein Coding	44	GC15P039581	8.61	https://www.genecards.org/cgi-bin/carddisp.pl?gene=THBS1															KIAA1330
																		AHSG	Alpha 2-HS Glycoprotein	Protein Coding	44	GC03P186612	8.59	https://www.genecards.org/cgi-bin/carddisp.pl?gene=AHSG															KIF3A
																		PROKR2	Prokineticin Receptor 2	Protein Coding	41	GC20M005303	8.56	https://www.genecards.org/cgi-bin/carddisp.pl?gene=PROKR2															KIT
																		USH2A	Usherin	Protein Coding	38	GC01M215622	8.54	https://www.genecards.org/cgi-bin/carddisp.pl?gene=USH2A															KITLG
																		MAPK10	Mitogen-Activated Protein Kinase 10	Protein Coding	51	GC04M085990	8.52	https://www.genecards.org/cgi-bin/carddisp.pl?gene=MAPK10															KL
																		CRB1	Crumbs Cell Polarity Complex Component 1	Protein Coding	43	GC01P197170	8.51	https://www.genecards.org/cgi-bin/carddisp.pl?gene=CRB1															KLF1
																		HCN4	Hyperpolarization Activated Cyclic Nucleotide Gated Potassium Channel 4	Protein Coding	47	GC15M073319	8.5	https://www.genecards.org/cgi-bin/carddisp.pl?gene=HCN4															KLF10
																		SCO1	Synthesis Of Cytochrome C Oxidase 1	Protein Coding	47	GC17M010672	8.5	https://www.genecards.org/cgi-bin/carddisp.pl?gene=SCO1															KLF11
																		TOP1	DNA Topoisomerase I	Protein Coding	48	GC20P041028	8.49	https://www.genecards.org/cgi-bin/carddisp.pl?gene=TOP1															KLF4
																		FTL	Ferritin Light Chain	Protein Coding	47	GC19P048965	8.49	https://www.genecards.org/cgi-bin/carddisp.pl?gene=FTL															KLF5
																		MT-TP	Mitochondrially Encoded TRNA-Pro (CCN)	RNA Gene	10	GCMTM015957	8.48	https://www.genecards.org/cgi-bin/carddisp.pl?gene=MT-TP															KLK1
																		MIR23B	MicroRNA 23b	RNA Gene	20	GC09P095085	8.47	https://www.genecards.org/cgi-bin/carddisp.pl?gene=MIR23B															KMT2D
																		WARS2	Tryptophanyl TRNA Synthetase 2, Mitochondrial	Protein Coding	44	GC01M119031	8.47	https://www.genecards.org/cgi-bin/carddisp.pl?gene=WARS2															KNG1
																		RERE	Arginine-Glutamic Acid Dipeptide Repeats	Protein Coding	41	GC01M008364	8.47	https://www.genecards.org/cgi-bin/carddisp.pl?gene=RERE															KPD
																		TERC	Telomerase RNA Component	RNA Gene	28	GC03M169765	8.46	https://www.genecards.org/cgi-bin/carddisp.pl?gene=TERC															KPPS2
																		LRRC10	Leucine Rich Repeat Containing 10	Protein Coding	34	GC12M069608	8.45	https://www.genecards.org/cgi-bin/carddisp.pl?gene=LRRC10															KRAS
																		APLNR	Apelin Receptor	Protein Coding	43	GC11M057233	8.45	https://www.genecards.org/cgi-bin/carddisp.pl?gene=APLNR															KRT8
																		PRPF31	Pre-MRNA Processing Factor 31	Protein Coding	42	GC19P055363	8.43	https://www.genecards.org/cgi-bin/carddisp.pl?gene=PRPF31															LAMA1
																		RNASEH2A	Ribonuclease H2 Subunit A	Protein Coding	43	GC19P012809	8.42	https://www.genecards.org/cgi-bin/carddisp.pl?gene=RNASEH2A															LAMA2
																		IREB2	Iron Responsive Element Binding Protein 2	Protein Coding	43	GC15P078437	8.42	https://www.genecards.org/cgi-bin/carddisp.pl?gene=IREB2															LAMA3
																		ITLN1	Intelectin 1	Protein Coding	39	GC01M160876	8.4	https://www.genecards.org/cgi-bin/carddisp.pl?gene=ITLN1															LAMA4
																		RHD	Rh Blood Group D Antigen	Protein Coding	40	GC01P025272	8.4	https://www.genecards.org/cgi-bin/carddisp.pl?gene=RHD															LAMB3
																		MIR20A	MicroRNA 20a	RNA Gene	19	GC13P091434	8.4	https://www.genecards.org/cgi-bin/carddisp.pl?gene=MIR20A															LAMC2
																		TMPRSS6	Transmembrane Serine Protease 6	Protein Coding	44	GC22M037066	8.4	https://www.genecards.org/cgi-bin/carddisp.pl?gene=TMPRSS6															LAMP1
																		HTR1A	5-Hydroxytryptamine Receptor 1A	Protein Coding	47	GC05M063960	8.38	https://www.genecards.org/cgi-bin/carddisp.pl?gene=HTR1A															LAMP2
																		AQP1	Aquaporin 1 (Colton Blood Group)	Protein Coding	45	GC07P030911	8.38	https://www.genecards.org/cgi-bin/carddisp.pl?gene=AQP1															LAX1
																		CD2AP	CD2 Associated Protein	Protein Coding	43	GC06P047777	8.36	https://www.genecards.org/cgi-bin/carddisp.pl?gene=CD2AP															LBR
																		NUDT10	Nudix Hydrolase 10	Protein Coding	35	GC0XP051332	8.36	https://www.genecards.org/cgi-bin/carddisp.pl?gene=NUDT10															LCN2
																		GPX3	Glutathione Peroxidase 3	Protein Coding	44	GC05P150997	8.35	https://www.genecards.org/cgi-bin/carddisp.pl?gene=GPX3															LDB3
																		AHI1	Abelson Helper Integration Site 1	Protein Coding	41	GC06M135283	8.35	https://www.genecards.org/cgi-bin/carddisp.pl?gene=AHI1															LEF1
																		LOC108783645	HFE Antisense RNA	RNA Gene	6	GC06M026088	8.34	https://www.genecards.org/cgi-bin/carddisp.pl?gene=LOC108783645															LEMD2
																		ATP5F1A	ATP Synthase F1 Subunit Alpha	Protein Coding	36	GC18M046081	8.34	https://www.genecards.org/cgi-bin/carddisp.pl?gene=ATP5F1A															LEMD3
																		BEST1	Bestrophin 1	Protein Coding	43	GC11P061949	8.34	https://www.genecards.org/cgi-bin/carddisp.pl?gene=BEST1															LEP
																		LMO7	LIM Domain 7	Protein Coding	40	GC13P075620	8.34	https://www.genecards.org/cgi-bin/carddisp.pl?gene=LMO7															LEPQTL1
																		NDUFAF8	NADH:Ubiquinone Oxidoreductase Complex Assembly Factor 8	Protein Coding	24	GC17P081241	8.33	https://www.genecards.org/cgi-bin/carddisp.pl?gene=NDUFAF8															LEPR
																		DHDDS	Dehydrodolichyl Diphosphate Synthase Subunit	Protein Coding	43	GC01P026432	8.31	https://www.genecards.org/cgi-bin/carddisp.pl?gene=DHDDS															LGALS3
																		MLH1	MutL Homolog 1	Protein Coding	48	GC03P036993	8.31	https://www.genecards.org/cgi-bin/carddisp.pl?gene=MLH1															LGMD1D
																		CLCNKA	Chloride Voltage-Gated Channel Ka	Protein Coding	40	GC01P016018	8.3	https://www.genecards.org/cgi-bin/carddisp.pl?gene=CLCNKA															LGMDR10
																		SLC6A6	Solute Carrier Family 6 Member 6	Protein Coding	44	GC03P014402	8.29	https://www.genecards.org/cgi-bin/carddisp.pl?gene=SLC6A6															LGMDR13
																		GPC3	Glypican 3	Protein Coding	45	GC0XM133535	8.29	https://www.genecards.org/cgi-bin/carddisp.pl?gene=GPC3															LGMDR6
																		DAG1	Dystroglycan 1	Protein Coding	46	GC03P049482	8.28	https://www.genecards.org/cgi-bin/carddisp.pl?gene=DAG1															LGMDR7
																		PDE3A	Phosphodiesterase 3A	Protein Coding	48	GC12P020294	8.24	https://www.genecards.org/cgi-bin/carddisp.pl?gene=PDE3A															LHX4
																		DSTYK	Dual Serine/Threonine And Tyrosine Protein Kinase	Protein Coding	41	GC01M205111	8.24	https://www.genecards.org/cgi-bin/carddisp.pl?gene=DSTYK															LIG4
																		PEX3	Peroxisomal Biogenesis Factor 3	Protein Coding	42	GC06P143450	8.23	https://www.genecards.org/cgi-bin/carddisp.pl?gene=PEX3															LIMK1
																		ATXN2	Ataxin 2	Protein Coding	42	GC12M111443	8.23	https://www.genecards.org/cgi-bin/carddisp.pl?gene=ATXN2															LIMS2
																		FANCC	FA Complementation Group C	Protein Coding	47	GC09M095099	8.23	https://www.genecards.org/cgi-bin/carddisp.pl?gene=FANCC															LIN28A
																		PRKAB1	Protein Kinase AMP-Activated Non-Catalytic Subunit Beta 1	Protein Coding	47	GC12P119632	8.22	https://www.genecards.org/cgi-bin/carddisp.pl?gene=PRKAB1															LIN9
																		ZIC3	Zic Family Member 3	Protein Coding	46	GC0XP137566	8.21	https://www.genecards.org/cgi-bin/carddisp.pl?gene=ZIC3															LIPC
																		PRPS1	Phosphoribosyl Pyrophosphate Synthetase 1	Protein Coding	46	GC0XP107628	8.21	https://www.genecards.org/cgi-bin/carddisp.pl?gene=PRPS1															LIPE
																		PRKN	Parkin RBR E3 Ubiquitin Protein Ligase	Protein Coding	40	GC06M161348	8.2	https://www.genecards.org/cgi-bin/carddisp.pl?gene=PRKN															LIPH
																		CHGA	Chromogranin A	Protein Coding	42	GC14P092923	8.2	https://www.genecards.org/cgi-bin/carddisp.pl?gene=CHGA															LMN1
																		ACTN4	Actinin Alpha 4	Protein Coding	46	GC19P038647	8.18	https://www.genecards.org/cgi-bin/carddisp.pl?gene=ACTN4															LMNA
																		DNM2	Dynamin 2	Protein Coding	49	GC19P010718	8.18	https://www.genecards.org/cgi-bin/carddisp.pl?gene=DNM2															LMNB1
																		OPA3	Outer Mitochondrial Membrane Lipid Metabolism Regulator OPA3	Protein Coding	39	GC19M045527	8.17	https://www.genecards.org/cgi-bin/carddisp.pl?gene=OPA3															LMNB2
																		NOTCH1	Notch Receptor 1	Protein Coding	51	GC09M136602	8.15	https://www.genecards.org/cgi-bin/carddisp.pl?gene=NOTCH1															LMO7
																		PRKG1	Protein Kinase CGMP-Dependent 1	Protein Coding	51	GC10P050991	8.15	https://www.genecards.org/cgi-bin/carddisp.pl?gene=PRKG1															LMOD1
																		SYNM	Synemin	Protein Coding	37	GC15P099098	8.14	https://www.genecards.org/cgi-bin/carddisp.pl?gene=SYNM															LOC102553868
																		MIR93	MicroRNA 93	RNA Gene	20	GC07M100282	8.13	https://www.genecards.org/cgi-bin/carddisp.pl?gene=MIR93															LOC108510657
																		SLC25A3	Solute Carrier Family 25 Member 3	Protein Coding	45	GC12P098593	8.12	https://www.genecards.org/cgi-bin/carddisp.pl?gene=SLC25A3															LOC108783645
																		TRMU	TRNA 5-Methylaminomethyl-2-Thiouridylate Methyltransferase	Protein Coding	39	GC22P046330	8.07	https://www.genecards.org/cgi-bin/carddisp.pl?gene=TRMU															LOC113687175
																		PRKD1	Protein Kinase D1	Protein Coding	50	GC14M029576	8.07	https://www.genecards.org/cgi-bin/carddisp.pl?gene=PRKD1															LONP1
																		VDAC1	Voltage Dependent Anion Channel 1	Protein Coding	45	GC05M133975	8.07	https://www.genecards.org/cgi-bin/carddisp.pl?gene=VDAC1															LOX
																		PUS1	Pseudouridine Synthase 1	Protein Coding	41	GC12P131929	8.04	https://www.genecards.org/cgi-bin/carddisp.pl?gene=PUS1															LPA
																		CTNND1	Catenin Delta 1	Protein Coding	45	GC11P057788	8.03	https://www.genecards.org/cgi-bin/carddisp.pl?gene=CTNND1															LPIN1
																		CD163	CD163 Molecule	Protein Coding	42	GC12M007471	8.02	https://www.genecards.org/cgi-bin/carddisp.pl?gene=CD163															LPIN2
																		TNFSF10	TNF Superfamily Member 10	Protein Coding	46	GC03M172505	8.02	https://www.genecards.org/cgi-bin/carddisp.pl?gene=TNFSF10															LPL
																		NEB	Nebulin	Protein Coding	41	GC02M151485	8.02	https://www.genecards.org/cgi-bin/carddisp.pl?gene=NEB															LQT3
																		PECAM1	Platelet And Endothelial Cell Adhesion Molecule 1	Protein Coding	40	GC17M064319	8.01	https://www.genecards.org/cgi-bin/carddisp.pl?gene=PECAM1															LQT9
																		GNAI2	G Protein Subunit Alpha I2	Protein Coding	47	GC03P050226	8.01	https://www.genecards.org/cgi-bin/carddisp.pl?gene=GNAI2															LRBA
																		ANKS6	Ankyrin Repeat And Sterile Alpha Motif Domain Containing 6	Protein Coding	38	GC09M098731	7.99	https://www.genecards.org/cgi-bin/carddisp.pl?gene=ANKS6															LRP5
																		RAD9B	RAD9 Checkpoint Clamp Component B	Protein Coding	36	GC12P110502	7.99	https://www.genecards.org/cgi-bin/carddisp.pl?gene=RAD9B															LRRC10
																		SP1	Sp1 Transcription Factor	Protein Coding	44	GC12P053380	7.98	https://www.genecards.org/cgi-bin/carddisp.pl?gene=SP1															LTA
																		ERCC4	ERCC Excision Repair 4, Endonuclease Catalytic Subunit	Protein Coding	45	GC16P013920	7.96	https://www.genecards.org/cgi-bin/carddisp.pl?gene=ERCC4															LTBP4
																		DNASE1L1	Deoxyribonuclease 1 Like 1	Protein Coding	38	GC0XM154401	7.95	https://www.genecards.org/cgi-bin/carddisp.pl?gene=DNASE1L1															LVNC10
																		ABCC6	ATP Binding Cassette Subfamily C Member 6	Protein Coding	45	GC16M016148	7.95	https://www.genecards.org/cgi-bin/carddisp.pl?gene=ABCC6															LVNC3
																		RMI2	RecQ Mediated Genome Instability 2	Protein Coding	33	GC16P011250	7.94	https://www.genecards.org/cgi-bin/carddisp.pl?gene=RMI2															LVNC4
																		TMEM199	Transmembrane Protein 199	Protein Coding	34	GC17P028358	7.93	https://www.genecards.org/cgi-bin/carddisp.pl?gene=TMEM199															LVNC6
																		SELENON	Selenoprotein N	Protein Coding	32	GC01P025800	7.93	https://www.genecards.org/cgi-bin/carddisp.pl?gene=SELENON															LVNC8
																		CRX	Cone-Rod Homeobox	Protein Coding	43	GC19P047819	7.91	https://www.genecards.org/cgi-bin/carddisp.pl?gene=CRX															LVNC9
																		PDGFRL	Platelet Derived Growth Factor Receptor Like	Protein Coding	41	GC08P017576	7.91	https://www.genecards.org/cgi-bin/carddisp.pl?gene=PDGFRL															LYP
																		ADORA2A	Adenosine A2a Receptor	Protein Coding	45	GC22P024417	7.9	https://www.genecards.org/cgi-bin/carddisp.pl?gene=ADORA2A															LYRM4
																		PROK2	Prokineticin 2	Protein Coding	44	GC03M071771	7.9	https://www.genecards.org/cgi-bin/carddisp.pl?gene=PROK2															M6PR
																		RDH12	Retinol Dehydrogenase 12	Protein Coding	45	GC14P067701	7.89	https://www.genecards.org/cgi-bin/carddisp.pl?gene=RDH12															M6S1
																		ITGB2	Integrin Subunit Beta 2	Protein Coding	50	GC21M044885	7.88	https://www.genecards.org/cgi-bin/carddisp.pl?gene=ITGB2															MAF
																		ITGA9	Integrin Subunit Alpha 9	Protein Coding	43	GC03P037468	7.88	https://www.genecards.org/cgi-bin/carddisp.pl?gene=ITGA9															MAFA
																		HDAC9	Histone Deacetylase 9	Protein Coding	46	GC07P018086	7.85	https://www.genecards.org/cgi-bin/carddisp.pl?gene=HDAC9															MAFB
																		SUN1	Sad1 And UNC84 Domain Containing 1	Protein Coding	37	GC07P000857	7.85	https://www.genecards.org/cgi-bin/carddisp.pl?gene=SUN1															MALAT1
																		RAD51C	RAD51 Paralog C	Protein Coding	43	GC17P058692	7.85	https://www.genecards.org/cgi-bin/carddisp.pl?gene=RAD51C															MAOA
																		PRPF8	Pre-MRNA Processing Factor 8	Protein Coding	41	GC17M001650	7.85	https://www.genecards.org/cgi-bin/carddisp.pl?gene=PRPF8															MAP2K1
																		ITGA5	Integrin Subunit Alpha 5	Protein Coding	48	GC12M054396	7.85	https://www.genecards.org/cgi-bin/carddisp.pl?gene=ITGA5															MAP2K2
																		ARAF	A-Raf Proto-Oncogene, Serine/Threonine Kinase	Protein Coding	45	GC0XP047562	7.85	https://www.genecards.org/cgi-bin/carddisp.pl?gene=ARAF															MAP2K4
																		MIR33A	MicroRNA 33a	RNA Gene	18	GC22P041900	7.84	https://www.genecards.org/cgi-bin/carddisp.pl?gene=MIR33A															MAP2K7
																		COL7A1	Collagen Type VII Alpha 1 Chain	Protein Coding	44	GC03M048564	7.83	https://www.genecards.org/cgi-bin/carddisp.pl?gene=COL7A1															MAP3K20
																		ACE2	Angiotensin I Converting Enzyme 2	Protein Coding	48	GC0XM015562	7.82	https://www.genecards.org/cgi-bin/carddisp.pl?gene=ACE2															MAPK1
																		FANCM	FA Complementation Group M	Protein Coding	42	GC14P045135	7.81	https://www.genecards.org/cgi-bin/carddisp.pl?gene=FANCM															MAPK10
																		BLOC1S1	Biogenesis Of Lysosomal Organelles Complex 1 Subunit 1	Protein Coding	36	GC12P055718	7.81	https://www.genecards.org/cgi-bin/carddisp.pl?gene=BLOC1S1															MAPK14
																		PCK2	Phosphoenolpyruvate Carboxykinase 2, Mitochondrial	Protein Coding	46	GC14P024094	7.8	https://www.genecards.org/cgi-bin/carddisp.pl?gene=PCK2															MAPK3
																		LIG4	DNA Ligase 4	Protein Coding	48	GC13M108207	7.78	https://www.genecards.org/cgi-bin/carddisp.pl?gene=LIG4															MAPK8
																		DSG1	Desmoglein 1	Protein Coding	43	GC18P031318	7.77	https://www.genecards.org/cgi-bin/carddisp.pl?gene=DSG1															MAPK8IP1
																		F13A1	Coagulation Factor XIII A Chain	Protein Coding	45	GC06M006144	7.77	https://www.genecards.org/cgi-bin/carddisp.pl?gene=F13A1															MAPK9
																		PEX2	Peroxisomal Biogenesis Factor 2	Protein Coding	43	GC08M076980	7.77	https://www.genecards.org/cgi-bin/carddisp.pl?gene=PEX2															MAPT
																		UTS2	Urotensin 2	Protein Coding	41	GC01M007843	7.77	https://www.genecards.org/cgi-bin/carddisp.pl?gene=UTS2															MAS1L
																		RPGRIP1L	RPGRIP1 Like	Protein Coding	39	GC16M053597	7.76	https://www.genecards.org/cgi-bin/carddisp.pl?gene=RPGRIP1L															MAT2B
																		FMR1	FMRP Translational Regulator 1	Protein Coding	44	GC0XP147913	7.76	https://www.genecards.org/cgi-bin/carddisp.pl?gene=FMR1															MAVS
																		PAGR1	PAXIP1 Associated Glutamate Rich Protein 1	Protein Coding	33	GC16P030096	7.76	https://www.genecards.org/cgi-bin/carddisp.pl?gene=PAGR1															MB
																		IL1A	Interleukin 1 Alpha	Protein Coding	44	GC02M112773	7.74	https://www.genecards.org/cgi-bin/carddisp.pl?gene=IL1A															MBL2
																		GSK3B	Glycogen Synthase Kinase 3 Beta	Protein Coding	50	GC03M119821	7.72	https://www.genecards.org/cgi-bin/carddisp.pl?gene=GSK3B															MC2R
																		MIF	Macrophage Migration Inhibitory Factor	Protein Coding	49	GC22P023894	7.71	https://www.genecards.org/cgi-bin/carddisp.pl?gene=MIF															MC3R
																		FABP1	Fatty Acid Binding Protein 1	Protein Coding	43	GC02M088122	7.7	https://www.genecards.org/cgi-bin/carddisp.pl?gene=FABP1															MC4R
																		SRA1	Steroid Receptor RNA Activator 1	Protein Coding	37	GC05M140537	7.7	https://www.genecards.org/cgi-bin/carddisp.pl?gene=SRA1															MCL1
																		TRNT1	TRNA Nucleotidyl Transferase 1	Protein Coding	41	GC03P003126	7.7	https://www.genecards.org/cgi-bin/carddisp.pl?gene=TRNT1															MDDGA4
																		EYS	Eyes Shut Homolog	Protein Coding	36	GC06M063719	7.67	https://www.genecards.org/cgi-bin/carddisp.pl?gene=EYS															MDDGB4
																		PDGFRB	Platelet Derived Growth Factor Receptor Beta	Protein Coding	55	GC05M150113	7.66	https://www.genecards.org/cgi-bin/carddisp.pl?gene=PDGFRB															MDDGC4
																		IFT43	Intraflagellar Transport 43	Protein Coding	37	GC14P075902	7.65	https://www.genecards.org/cgi-bin/carddisp.pl?gene=IFT43															MDM2
																		CERKL	Ceramide Kinase Like	Protein Coding	39	GC02M181536	7.65	https://www.genecards.org/cgi-bin/carddisp.pl?gene=CERKL															MDRCMTT
																		PF4	Platelet Factor 4	Protein Coding	41	GC04M073980	7.64	https://www.genecards.org/cgi-bin/carddisp.pl?gene=PF4															MECP2
																		ADRA1D	Adrenoceptor Alpha 1D	Protein Coding	45	GC20M004220	7.63	https://www.genecards.org/cgi-bin/carddisp.pl?gene=ADRA1D															MED13
																		SRD5A3	Steroid 5 Alpha-Reductase 3	Protein Coding	43	GC04P055346	7.63	https://www.genecards.org/cgi-bin/carddisp.pl?gene=SRD5A3															MEDS
																		AQP4	Aquaporin 4	Protein Coding	45	GC18M026852	7.62	https://www.genecards.org/cgi-bin/carddisp.pl?gene=AQP4															MEF2A
																		ITGB4	Integrin Subunit Beta 4	Protein Coding	48	GC17P075721	7.62	https://www.genecards.org/cgi-bin/carddisp.pl?gene=ITGB4															MEF2C
																		CYP19A1	Cytochrome P450 Family 19 Subfamily A Member 1	Protein Coding	48	GC15M051208	7.57	https://www.genecards.org/cgi-bin/carddisp.pl?gene=CYP19A1															MEG3
																		IDH1	Isocitrate Dehydrogenase (NADP(+)) 1	Protein Coding	52	GC02M208236	7.57	https://www.genecards.org/cgi-bin/carddisp.pl?gene=IDH1															MEG8
																		CTSL	Cathepsin L	Protein Coding	46	GC09P087725	7.55	https://www.genecards.org/cgi-bin/carddisp.pl?gene=CTSL															MEL1
																		SEC23B	SEC23 Homolog B, COPII Coat Complex Component	Protein Coding	43	GC20P018507	7.54	https://www.genecards.org/cgi-bin/carddisp.pl?gene=SEC23B															MEN1
																		CNGB1	Cyclic Nucleotide Gated Channel Subunit Beta 1	Protein Coding	43	GC16M057884	7.52	https://www.genecards.org/cgi-bin/carddisp.pl?gene=CNGB1															MEST
																		AVPR1B	Arginine Vasopressin Receptor 1B	Protein Coding	43	GC01M206109	7.52	https://www.genecards.org/cgi-bin/carddisp.pl?gene=AVPR1B															MET
																		NGF	Nerve Growth Factor	Protein Coding	50	GC01M115285	7.52	https://www.genecards.org/cgi-bin/carddisp.pl?gene=NGF															METTL1
																		MMUT	Methylmalonyl-CoA Mutase	Protein Coding	35	GC06M049430	7.5	https://www.genecards.org/cgi-bin/carddisp.pl?gene=MMUT															MFAP1
																		NSUN2	NOP2/Sun RNA Methyltransferase 2	Protein Coding	42	GC05M006599	7.49	https://www.genecards.org/cgi-bin/carddisp.pl?gene=NSUN2															MFH1
																		RTN4	Reticulon 4	Protein Coding	44	GC02M054934	7.48	https://www.genecards.org/cgi-bin/carddisp.pl?gene=RTN4															MFM1
																		ADCY3	Adenylate Cyclase 3	Protein Coding	47	GC02M024819	7.47	https://www.genecards.org/cgi-bin/carddisp.pl?gene=ADCY3															MFM2
																		MAP3K20	Mitogen-Activated Protein Kinase Kinase Kinase 20	Protein Coding	39	GC02P173076	7.45	https://www.genecards.org/cgi-bin/carddisp.pl?gene=MAP3K20															MFM4
																		FANCG	FA Complementation Group G	Protein Coding	43	GC09M035073	7.44	https://www.genecards.org/cgi-bin/carddisp.pl?gene=FANCG															MFM5
																		FTMT	Ferritin Mitochondrial	Protein Coding	38	GC05P121851	7.42	https://www.genecards.org/cgi-bin/carddisp.pl?gene=FTMT															MFM6
																		IFT140	Intraflagellar Transport 140	Protein Coding	39	GC16M001569	7.42	https://www.genecards.org/cgi-bin/carddisp.pl?gene=IFT140															MFN2
																		IFT172	Intraflagellar Transport 172	Protein Coding	39	GC02M027448	7.42	https://www.genecards.org/cgi-bin/carddisp.pl?gene=IFT172															MGAM
																		CLRN1	Clarin 1	Protein Coding	35	GC03M150926	7.42	https://www.genecards.org/cgi-bin/carddisp.pl?gene=CLRN1															MGME1
																		COQ8A	Coenzyme Q8A	Protein Coding	36	GC01P226899	7.41	https://www.genecards.org/cgi-bin/carddisp.pl?gene=COQ8A															MGP
																		LAMA3	Laminin Subunit Alpha 3	Protein Coding	44	GC18P023689	7.41	https://www.genecards.org/cgi-bin/carddisp.pl?gene=LAMA3															Mgst1
																		TNNC2	Troponin C2, Fast Skeletal Type	Protein Coding	38	GC20M045823	7.4	https://www.genecards.org/cgi-bin/carddisp.pl?gene=TNNC2															MIA2
																		MYH9	Myosin Heavy Chain 9	Protein Coding	49	GC22M036281	7.4	https://www.genecards.org/cgi-bin/carddisp.pl?gene=MYH9															MIAT
																		VIP	Vasoactive Intestinal Peptide	Protein Coding	44	GC06P152750	7.39	https://www.genecards.org/cgi-bin/carddisp.pl?gene=VIP															MICA
																		CA4	Carbonic Anhydrase 4	Protein Coding	47	GC17P060149	7.39	https://www.genecards.org/cgi-bin/carddisp.pl?gene=CA4															MICU1
																		SGK1	Serum/Glucocorticoid Regulated Kinase 1	Protein Coding	48	GC06M134169	7.37	https://www.genecards.org/cgi-bin/carddisp.pl?gene=SGK1															MIDORI
																		HMGB1	High Mobility Group Box 1	Protein Coding	44	GC13M030456	7.37	https://www.genecards.org/cgi-bin/carddisp.pl?gene=HMGB1															MIF
																		PAX6	Paired Box 6	Protein Coding	47	GC11M031784	7.36	https://www.genecards.org/cgi-bin/carddisp.pl?gene=PAX6															MIPEP
																		KCNA2	Potassium Voltage-Gated Channel Subfamily A Member 2	Protein Coding	45	GC01M110519	7.36	https://www.genecards.org/cgi-bin/carddisp.pl?gene=KCNA2															MIR106B
																		TUBA1A	Tubulin Alpha 1a	Protein Coding	48	GC12M049184	7.35	https://www.genecards.org/cgi-bin/carddisp.pl?gene=TUBA1A															MIR10A
																		PPARD	Peroxisome Proliferator Activated Receptor Delta	Protein Coding	47	GC06P047433	7.35	https://www.genecards.org/cgi-bin/carddisp.pl?gene=PPARD															MIR1-2
																		PTGDS	Prostaglandin D2 Synthase	Protein Coding	45	GC09P136982	7.34	https://www.genecards.org/cgi-bin/carddisp.pl?gene=PTGDS															MIR122
																		APOH	Apolipoprotein H	Protein Coding	44	GC17M066212	7.34	https://www.genecards.org/cgi-bin/carddisp.pl?gene=APOH															MIR125A
																		DNM1	Dynamin 1	Protein Coding	50	GC09P128191	7.33	https://www.genecards.org/cgi-bin/carddisp.pl?gene=DNM1															MIR126
																		BCL2	BCL2 Apoptosis Regulator	Protein Coding	51	GC18M063123	7.31	https://www.genecards.org/cgi-bin/carddisp.pl?gene=BCL2															MIR127
																		ARNT2	Aryl Hydrocarbon Receptor Nuclear Translocator 2	Protein Coding	43	GC15P080404	7.3	https://www.genecards.org/cgi-bin/carddisp.pl?gene=ARNT2															MIR130A
																		LAMP1	Lysosomal Associated Membrane Protein 1	Protein Coding	43	GC13P113297	7.3	https://www.genecards.org/cgi-bin/carddisp.pl?gene=LAMP1															MIR132
																		CHIT1	Chitinase 1	Protein Coding	43	GC01M203181	7.3	https://www.genecards.org/cgi-bin/carddisp.pl?gene=CHIT1															MIR134
																		MIR200B	MicroRNA 200b	RNA Gene	20	GC01P001167	7.28	https://www.genecards.org/cgi-bin/carddisp.pl?gene=MIR200B															MIR140
																		MT-TA	Mitochondrially Encoded TRNA-Ala (GCN)	RNA Gene	10	GCMTM005589	7.28	https://www.genecards.org/cgi-bin/carddisp.pl?gene=MT-TA															MIR142
																		FTSJ1	FtsJ RNA 2'-O-Methyltransferase 1	Protein Coding	41	GC0XP048476	7.26	https://www.genecards.org/cgi-bin/carddisp.pl?gene=FTSJ1															MIR145
																		TRMT11	TRNA Methyltransferase 11 Homolog	Protein Coding	37	GC06P125986	7.26	https://www.genecards.org/cgi-bin/carddisp.pl?gene=TRMT11															MIR146A
																		KCND3	Potassium Voltage-Gated Channel Subfamily D Member 3	Protein Coding	46	GC01M111770	7.26	https://www.genecards.org/cgi-bin/carddisp.pl?gene=KCND3															MIR146B
																		MIA2	MIA SH3 Domain ER Export Factor 2	Protein Coding	37	GC14P039230	7.25	https://www.genecards.org/cgi-bin/carddisp.pl?gene=MIA2															MIR154
																		KCNE1	Potassium Voltage-Gated Channel Subfamily E Regulatory Subunit 1	Protein Coding	44	GC21M034446	7.25	https://www.genecards.org/cgi-bin/carddisp.pl?gene=KCNE1															MIR155
																		ANGPT2	Angiopoietin 2	Protein Coding	44	GC08M006499	7.25	https://www.genecards.org/cgi-bin/carddisp.pl?gene=ANGPT2															MIR15A
																		FANCD2	FA Complementation Group D2	Protein Coding	47	GC03P010026	7.24	https://www.genecards.org/cgi-bin/carddisp.pl?gene=FANCD2															MIR17
																		GAST	Gastrin	Protein Coding	40	GC17P041712	7.23	https://www.genecards.org/cgi-bin/carddisp.pl?gene=GAST															MIR181A2
																		KLF5	Kruppel Like Factor 5	Protein Coding	44	GC13P073054	7.22	https://www.genecards.org/cgi-bin/carddisp.pl?gene=KLF5															MIR18A
																		ADCY6	Adenylate Cyclase 6	Protein Coding	47	GC12M048766	7.22	https://www.genecards.org/cgi-bin/carddisp.pl?gene=ADCY6															MIR193A
																		TXNIP	Thioredoxin Interacting Protein	Protein Coding	37	GC01M145992	7.21	https://www.genecards.org/cgi-bin/carddisp.pl?gene=TXNIP															MIR193B
																		COL1A2	Collagen Type I Alpha 2 Chain	Protein Coding	47	GC07P094394	7.21	https://www.genecards.org/cgi-bin/carddisp.pl?gene=COL1A2															MIR195
																		AFP	Alpha Fetoprotein	Protein Coding	45	GC04P073431	7.2	https://www.genecards.org/cgi-bin/carddisp.pl?gene=AFP															MIR196A1
																		PSMA5	Proteasome 20S Subunit Alpha 5	Protein Coding	43	GC01M109399	7.19	https://www.genecards.org/cgi-bin/carddisp.pl?gene=PSMA5															MIR196A2
																		BSG	Basigin (Ok Blood Group)	Protein Coding	44	GC19P000571	7.18	https://www.genecards.org/cgi-bin/carddisp.pl?gene=BSG															MIR197
																		TAP2	Transporter 2, ATP Binding Cassette Subfamily B Member	Protein Coding	44	GC06M032821	7.17	https://www.genecards.org/cgi-bin/carddisp.pl?gene=TAP2															MIR199A1
																		BIN1	Bridging Integrator 1	Protein Coding	46	GC02M127048	7.14	https://www.genecards.org/cgi-bin/carddisp.pl?gene=BIN1															MIR199B
																		MT-RNR2	Mitochondrially Encoded 16S RRNA	RNA Gene	18	GCMTP001674	7.13	https://www.genecards.org/cgi-bin/carddisp.pl?gene=MT-RNR2															MIR19A
																		CD19	CD19 Molecule	Protein Coding	49	GC16P029083	7.12	https://www.genecards.org/cgi-bin/carddisp.pl?gene=CD19															MIR19B1
																		LAX1	Lymphocyte Transmembrane Adaptor 1	Protein Coding	36	GC01P203768	7.12	https://www.genecards.org/cgi-bin/carddisp.pl?gene=LAX1															MIR200B
																		RTL1	Retrotransposon Gag Like 1	Protein Coding	31	GC14M100880	7.11	https://www.genecards.org/cgi-bin/carddisp.pl?gene=RTL1															MIR20A
																		ALAS2	5'-Aminolevulinate Synthase 2	Protein Coding	45	GC0XM055009	7.11	https://www.genecards.org/cgi-bin/carddisp.pl?gene=ALAS2															MIR21
																		MIR25	MicroRNA 25	RNA Gene	20	GC07M100093	7.11	https://www.genecards.org/cgi-bin/carddisp.pl?gene=MIR25															MIR210
																		GLDC	Glycine Decarboxylase	Protein Coding	47	GC09M006522	7.1	https://www.genecards.org/cgi-bin/carddisp.pl?gene=GLDC															MIR214
																		MICU1	Mitochondrial Calcium Uptake 1	Protein Coding	39	GC10M072367	7.1	https://www.genecards.org/cgi-bin/carddisp.pl?gene=MICU1															MIR22
																		ANGPTL4	Angiopoietin Like 4	Protein Coding	45	GC19P008363	7.09	https://www.genecards.org/cgi-bin/carddisp.pl?gene=ANGPTL4															MIR221
																		PINK1	PTEN Induced Kinase 1	Protein Coding	47	GC01P020634	7.09	https://www.genecards.org/cgi-bin/carddisp.pl?gene=PINK1															MIR222
																		TUG1	Taurine Up-Regulated 1	RNA Gene	22	GC22P030969	7.09	https://www.genecards.org/cgi-bin/carddisp.pl?gene=TUG1															MIR223
																		CDIN1	CDAN1 Interacting Nuclease 1	Protein Coding	29	GC15P036580	7.08	https://www.genecards.org/cgi-bin/carddisp.pl?gene=CDIN1															MIR23B
																		ALOX12	Arachidonate 12-Lipoxygenase, 12S Type	Protein Coding	43	GC17P006995	7.08	https://www.genecards.org/cgi-bin/carddisp.pl?gene=ALOX12															MIR25
																		SYVN1	Synoviolin 1	Protein Coding	40	GC11M065122	7.07	https://www.genecards.org/cgi-bin/carddisp.pl?gene=SYVN1															MIR27A
																		LAMA1	Laminin Subunit Alpha 1	Protein Coding	45	GC18M006941	7.07	https://www.genecards.org/cgi-bin/carddisp.pl?gene=LAMA1															MIR27B
																		CFAP47	Cilia And Flagella Associated Protein 47	Protein Coding	25	GC0XP035919	7.07	https://www.genecards.org/cgi-bin/carddisp.pl?gene=CFAP47															MIR28
																		RHOU	Ras Homolog Family Member U	Protein Coding	37	GC01P228644	7.07	https://www.genecards.org/cgi-bin/carddisp.pl?gene=RHOU															MIR29A
																		FXYD2	FXYD Domain Containing Ion Transport Regulator 2	Protein Coding	43	GC11M117800	7.04	https://www.genecards.org/cgi-bin/carddisp.pl?gene=FXYD2															MIR29C
																		RPH3A	Rabphilin 3A	Protein Coding	39	GC12P112570	7.03	https://www.genecards.org/cgi-bin/carddisp.pl?gene=RPH3A															MIR30A
																		PPOX	Protoporphyrinogen Oxidase	Protein Coding	43	GC01P161167	7.03	https://www.genecards.org/cgi-bin/carddisp.pl?gene=PPOX															MIR30E
																		DGUOK	Deoxyguanosine Kinase	Protein Coding	44	GC02P073926	7.02	https://www.genecards.org/cgi-bin/carddisp.pl?gene=DGUOK															MIR32
																		HNRNPUL2-BSCL2	HNRNPUL2-BSCL2 Readthrough (NMD Candidate)	RNA Gene	15	GC11M063439	7.02	https://www.genecards.org/cgi-bin/carddisp.pl?gene=HNRNPUL2-BSCL2															MIR33A
																		ESR2	Estrogen Receptor 2	Protein Coding	49	GC14M064084	7	https://www.genecards.org/cgi-bin/carddisp.pl?gene=ESR2															MIR342
																		MIR9-1	MicroRNA 9-1	RNA Gene	20	GC01M156420	6.99	https://www.genecards.org/cgi-bin/carddisp.pl?gene=MIR9-1															MIR34A
																		UGT1A1	UDP Glucuronosyltransferase Family 1 Member A1	Protein Coding	48	GC02P233760	6.99	https://www.genecards.org/cgi-bin/carddisp.pl?gene=UGT1A1															MIR378A
																		DDX58	DExD/H-Box Helicase 58	Protein Coding	47	GC09M032455	6.98	https://www.genecards.org/cgi-bin/carddisp.pl?gene=DDX58															MIR382
																		TAP1	Transporter 1, ATP Binding Cassette Subfamily B Member	Protein Coding	47	GC06M032865	6.98	https://www.genecards.org/cgi-bin/carddisp.pl?gene=TAP1															MIR423
																		CISD1	CDGSH Iron Sulfur Domain 1	Protein Coding	38	GC10P058269	6.97	https://www.genecards.org/cgi-bin/carddisp.pl?gene=CISD1															MIR451A
																		LHX4	LIM Homeobox 4	Protein Coding	41	GC01P180230	6.97	https://www.genecards.org/cgi-bin/carddisp.pl?gene=LHX4															MIR483
																		ITGA6	Integrin Subunit Alpha 6	Protein Coding	49	GC02P172427	6.97	https://www.genecards.org/cgi-bin/carddisp.pl?gene=ITGA6															MIR486-1
																		LAMB3	Laminin Subunit Beta 3	Protein Coding	45	GC01M209614	6.97	https://www.genecards.org/cgi-bin/carddisp.pl?gene=LAMB3															MIR499A
																		HSPB8	Heat Shock Protein Family B (Small) Member 8	Protein Coding	44	GC12P119178	6.96	https://www.genecards.org/cgi-bin/carddisp.pl?gene=HSPB8															MIR503
																		NSUN5	NOP2/Sun RNA Methyltransferase 5	Protein Coding	38	GC07M073302	6.95	https://www.genecards.org/cgi-bin/carddisp.pl?gene=NSUN5															MIR551B
																		NOP2	NOP2 Nucleolar Protein	Protein Coding	36	GC12M006556	6.95	https://www.genecards.org/cgi-bin/carddisp.pl?gene=NOP2															MIR675
																		BUD23	BUD23 RRNA Methyltransferase And Ribosome Maturation Factor	Protein Coding	30	GC07P073685	6.95	https://www.genecards.org/cgi-bin/carddisp.pl?gene=BUD23															MIR9-1
																		ERCC1	ERCC Excision Repair 1, Endonuclease Non-Catalytic Subunit	Protein Coding	45	GC19M045409	6.94	https://www.genecards.org/cgi-bin/carddisp.pl?gene=ERCC1															MIR92A2
																		ADCY8	Adenylate Cyclase 8	Protein Coding	44	GC08M130780	6.92	https://www.genecards.org/cgi-bin/carddisp.pl?gene=ADCY8															MIR93
																		SCN3A	Sodium Voltage-Gated Channel Alpha Subunit 3	Protein Coding	47	GC02M165087	6.92	https://www.genecards.org/cgi-bin/carddisp.pl?gene=SCN3A															MKKS
																		PDSS1	Decaprenyl Diphosphate Synthase Subunit 1	Protein Coding	42	GC10P026697	6.91	https://www.genecards.org/cgi-bin/carddisp.pl?gene=PDSS1															MKRN3
																		DRD5	Dopamine Receptor D5	Protein Coding	47	GC04P009783	6.91	https://www.genecards.org/cgi-bin/carddisp.pl?gene=DRD5															MKS1
																		MT-ND4L	Mitochondrially Encoded NADH:Ubiquinone Oxidoreductase Core Subunit 4L	Protein Coding	28	GCMTP010472	6.9	https://www.genecards.org/cgi-bin/carddisp.pl?gene=MT-ND4L															MLCK
																		MNX1	Motor Neuron And Pancreas Homeobox 1	Protein Coding	41	GC07M156994	6.88	https://www.genecards.org/cgi-bin/carddisp.pl?gene=MNX1															MLH1
																		NFKB1	Nuclear Factor Kappa B Subunit 1	Protein Coding	52	GC04P102501	6.87	https://www.genecards.org/cgi-bin/carddisp.pl?gene=NFKB1															MLN
																		PPIF	Peptidylprolyl Isomerase F	Protein Coding	43	GC10P083661	6.87	https://www.genecards.org/cgi-bin/carddisp.pl?gene=PPIF															MLX
																		AMACR	Alpha-Methylacyl-CoA Racemase	Protein Coding	45	GC05M033986	6.86	https://www.genecards.org/cgi-bin/carddisp.pl?gene=AMACR															MLXIPL
																		CNGA1	Cyclic Nucleotide Gated Channel Subunit Alpha 1	Protein Coding	45	GC04M047935	6.86	https://www.genecards.org/cgi-bin/carddisp.pl?gene=CNGA1															MLYCD
																		PCARE	Photoreceptor Cilium Actin Regulator	Protein Coding	28	GC02M029060	6.86	https://www.genecards.org/cgi-bin/carddisp.pl?gene=PCARE															MME
																		SDC3	Syndecan 3	Protein Coding	42	GC01M030869	6.85	https://www.genecards.org/cgi-bin/carddisp.pl?gene=SDC3															MMP1
																		CDAN1	Codanin 1	Protein Coding	39	GC15M042723	6.85	https://www.genecards.org/cgi-bin/carddisp.pl?gene=CDAN1															MMP14
																		CASP4	Caspase 4	Protein Coding	46	GC11M104942	6.84	https://www.genecards.org/cgi-bin/carddisp.pl?gene=CASP4															MMP2
																		MT-TY	Mitochondrially Encoded TRNA-Tyr (UAU/C)	RNA Gene	10	GCMTM005828	6.84	https://www.genecards.org/cgi-bin/carddisp.pl?gene=MT-TY															MMP3
																		SLC22A4	Solute Carrier Family 22 Member 4	Protein Coding	43	GC05P132294	6.84	https://www.genecards.org/cgi-bin/carddisp.pl?gene=SLC22A4															MMP7
																		STX1A	Syntaxin 1A	Protein Coding	47	GC07M073700	6.84	https://www.genecards.org/cgi-bin/carddisp.pl?gene=STX1A															MMP9
																		MTUS1	Microtubule Associated Scaffold Protein 1	Protein Coding	36	GC08M017643	6.84	https://www.genecards.org/cgi-bin/carddisp.pl?gene=MTUS1															MMUT
																		PGC	Progastricsin	Protein Coding	42	GC06M041736	6.81	https://www.genecards.org/cgi-bin/carddisp.pl?gene=PGC															MNSOD
																		CYBRD1	Cytochrome B Reductase 1	Protein Coding	40	GC02P171522	6.8	https://www.genecards.org/cgi-bin/carddisp.pl?gene=CYBRD1															MNX1
																		BCHE	Butyrylcholinesterase	Protein Coding	48	GC03M165772	6.8	https://www.genecards.org/cgi-bin/carddisp.pl?gene=BCHE															MODY1
																		RELA	RELA Proto-Oncogene, NF-KB Subunit	Protein Coding	50	GC11M065653	6.8	https://www.genecards.org/cgi-bin/carddisp.pl?gene=RELA															MODY10
																		NSUN6	NOP2/Sun RNA Methyltransferase 6	Protein Coding	36	GC10M018520	6.8	https://www.genecards.org/cgi-bin/carddisp.pl?gene=NSUN6															MODY11
																		MEST	Mesoderm Specific Transcript	Protein Coding	39	GC07P130486	6.77	https://www.genecards.org/cgi-bin/carddisp.pl?gene=MEST															MODY13
																		HTT	Huntingtin	Protein Coding	43	GC04P003041	6.77	https://www.genecards.org/cgi-bin/carddisp.pl?gene=HTT															MODY14
																		HEPH	Hephaestin	Protein Coding	39	GC0XP066162	6.76	https://www.genecards.org/cgi-bin/carddisp.pl?gene=HEPH															MODY3
																		FGFR3	Fibroblast Growth Factor Receptor 3	Protein Coding	55	GC04P001795	6.76	https://www.genecards.org/cgi-bin/carddisp.pl?gene=FGFR3															MODY4
																		DTNBP1	Dystrobrevin Binding Protein 1	Protein Coding	41	GC06M015470	6.75	https://www.genecards.org/cgi-bin/carddisp.pl?gene=DTNBP1															MODY5
																		GLUD1	Glutamate Dehydrogenase 1	Protein Coding	50	GC10M087050	6.75	https://www.genecards.org/cgi-bin/carddisp.pl?gene=GLUD1															MODY7
																		TYK2	Tyrosine Kinase 2	Protein Coding	52	GC19M010350	6.75	https://www.genecards.org/cgi-bin/carddisp.pl?gene=TYK2															MODY8
																		PPARGC1B	PPARG Coactivator 1 Beta	Protein Coding	35	GC05P149730	6.73	https://www.genecards.org/cgi-bin/carddisp.pl?gene=PPARGC1B															MODY9
																		CSH2	Chorionic Somatomammotropin Hormone 2	Protein Coding	32	GC17M063872	6.73	https://www.genecards.org/cgi-bin/carddisp.pl?gene=CSH2															MPD1
																		PC	Pyruvate Carboxylase	Protein Coding	47	GC11M066848	6.71	https://www.genecards.org/cgi-bin/carddisp.pl?gene=PC															MPD4
																		NNT	Nicotinamide Nucleotide Transhydrogenase	Protein Coding	45	GC05P043603	6.71	https://www.genecards.org/cgi-bin/carddisp.pl?gene=NNT															MPD6
																		P2RY12	Purinergic Receptor P2Y12	Protein Coding	48	GC03M151336	6.7	https://www.genecards.org/cgi-bin/carddisp.pl?gene=P2RY12															MPDT
																		CACNA1H	Calcium Voltage-Gated Channel Subunit Alpha1 H	Protein Coding	50	GC16P001153	6.69	https://www.genecards.org/cgi-bin/carddisp.pl?gene=CACNA1H															MPO
																		FANCL	FA Complementation Group L	Protein Coding	45	GC02M058127	6.69	https://www.genecards.org/cgi-bin/carddisp.pl?gene=FANCL															MPP2
																		FANCE	FA Complementation Group E	Protein Coding	41	GC06P047436	6.69	https://www.genecards.org/cgi-bin/carddisp.pl?gene=FANCE															MPRM
																		GABARAPL1	GABA Type A Receptor Associated Protein Like 1	Protein Coding	43	GC12P010212	6.69	https://www.genecards.org/cgi-bin/carddisp.pl?gene=GABARAPL1															MPV17
																		VHL	Von Hippel-Lindau Tumor Suppressor	Protein Coding	47	GC03P010211	6.68	https://www.genecards.org/cgi-bin/carddisp.pl?gene=VHL															MRAP
																		TRDN	Triadin	Protein Coding	41	GC06M123198	6.67	https://www.genecards.org/cgi-bin/carddisp.pl?gene=TRDN															MRAS
																		COL1A1	Collagen Type I Alpha 1 Chain	Protein Coding	50	GC17M050183	6.67	https://www.genecards.org/cgi-bin/carddisp.pl?gene=COL1A1															MRPL44
																		NCAM1	Neural Cell Adhesion Molecule 1	Protein Coding	45	GC11P112961	6.67	https://www.genecards.org/cgi-bin/carddisp.pl?gene=NCAM1															MRRF
																		RND1	Rho Family GTPase 1	Protein Coding	38	GC12M048857	6.67	https://www.genecards.org/cgi-bin/carddisp.pl?gene=RND1															MST1
																		IFNB1	Interferon Beta 1	Protein Coding	41	GC09M021077	6.66	https://www.genecards.org/cgi-bin/carddisp.pl?gene=IFNB1															MSTN
																		LAMC2	Laminin Subunit Gamma 2	Protein Coding	45	GC01P183155	6.66	https://www.genecards.org/cgi-bin/carddisp.pl?gene=LAMC2															MT-ATP6
																		IQCB1	IQ Motif Containing B1	Protein Coding	41	GC03M121769	6.66	https://www.genecards.org/cgi-bin/carddisp.pl?gene=IQCB1															MT-ATP8
																		IL1R1	Interleukin 1 Receptor Type 1	Protein Coding	45	GC02P102136	6.66	https://www.genecards.org/cgi-bin/carddisp.pl?gene=IL1R1															MT-CO1
																		FADS1	Fatty Acid Desaturase 1	Protein Coding	44	GC11M061799	6.66	https://www.genecards.org/cgi-bin/carddisp.pl?gene=FADS1															MT-CO2
																		SLC25A24	Solute Carrier Family 25 Member 24	Protein Coding	43	GC01M108134	6.65	https://www.genecards.org/cgi-bin/carddisp.pl?gene=SLC25A24															MT-CO3
																		HLA-C	Major Histocompatibility Complex, Class I, C	Protein Coding	44	GC06M031272	6.65	https://www.genecards.org/cgi-bin/carddisp.pl?gene=HLA-C															MT-CYB
																		CAVIN4	Caveolae Associated Protein 4	Protein Coding	26	GC09P100576	6.65	https://www.genecards.org/cgi-bin/carddisp.pl?gene=CAVIN4															MTDH
																		SEMA4A	Semaphorin 4A	Protein Coding	45	GC01P156119	6.64	https://www.genecards.org/cgi-bin/carddisp.pl?gene=SEMA4A															MTFMT
																		FANCI	FA Complementation Group I	Protein Coding	41	GC15P089243	6.63	https://www.genecards.org/cgi-bin/carddisp.pl?gene=FANCI															MTHFR
																		CPOX	Coproporphyrinogen Oxidase	Protein Coding	43	GC03M098576	6.63	https://www.genecards.org/cgi-bin/carddisp.pl?gene=CPOX															MTM1
																		AHDC1	AT-Hook DNA Binding Motif Containing 1	Protein Coding	36	GC01M027546	6.63	https://www.genecards.org/cgi-bin/carddisp.pl?gene=AHDC1															MT-ND1
																		GABBR1	Gamma-Aminobutyric Acid Type B Receptor Subunit 1	Protein Coding	47	GC06M029555	6.62	https://www.genecards.org/cgi-bin/carddisp.pl?gene=GABBR1															MT-ND2
																		JAG1	Jagged Canonical Notch Ligand 1	Protein Coding	50	GC20M010637	6.61	https://www.genecards.org/cgi-bin/carddisp.pl?gene=JAG1															MT-ND3
																		CTSD	Cathepsin D	Protein Coding	52	GC11M001752	6.61	https://www.genecards.org/cgi-bin/carddisp.pl?gene=CTSD															MT-ND4
																		ANK3	Ankyrin 3	Protein Coding	44	GC10M060026	6.59	https://www.genecards.org/cgi-bin/carddisp.pl?gene=ANK3															MT-ND4L
																		RCE1	Ras Converting CAAX Endopeptidase 1	Protein Coding	38	GC11P066842	6.59	https://www.genecards.org/cgi-bin/carddisp.pl?gene=RCE1															MT-ND5
																		WDR20	WD Repeat Domain 20	Protein Coding	35	GC14P104636	6.57	https://www.genecards.org/cgi-bin/carddisp.pl?gene=WDR20															MT-ND6
																		CARTPT	CART Prepropeptide	Protein Coding	44	GC05P071719	6.56	https://www.genecards.org/cgi-bin/carddisp.pl?gene=CARTPT															MTNR1B
																		TCF4	Transcription Factor 4	Protein Coding	46	GC18M055222	6.56	https://www.genecards.org/cgi-bin/carddisp.pl?gene=TCF4															MTO1
																		SLC6A4	Solute Carrier Family 6 Member 4	Protein Coding	47	GC17M030194	6.54	https://www.genecards.org/cgi-bin/carddisp.pl?gene=SLC6A4															MTOR
																		CD248	CD248 Molecule	Protein Coding	39	GC11M066314	6.54	https://www.genecards.org/cgi-bin/carddisp.pl?gene=CD248															MT-RNR1
																		PALLD	Palladin, Cytoskeletal Associated Protein	Protein Coding	42	GC04P168497	6.54	https://www.genecards.org/cgi-bin/carddisp.pl?gene=PALLD															MT-RNR2
																		GNRHR	Gonadotropin Releasing Hormone Receptor	Protein Coding	47	GC04M067737	6.5	https://www.genecards.org/cgi-bin/carddisp.pl?gene=GNRHR															MT-TA
																		CAMK2D	Calcium/Calmodulin Dependent Protein Kinase II Delta	Protein Coding	48	GC04M113452	6.49	https://www.genecards.org/cgi-bin/carddisp.pl?gene=CAMK2D															MT-TE
																		S100A12	S100 Calcium Binding Protein A12	Protein Coding	39	GC01M153373	6.48	https://www.genecards.org/cgi-bin/carddisp.pl?gene=S100A12															MT-TF
																		OTC	Ornithine Carbamoyltransferase	Protein Coding	47	GC0XP038353	6.48	https://www.genecards.org/cgi-bin/carddisp.pl?gene=OTC															MT-TH
																		MBL2	Mannose Binding Lectin 2	Protein Coding	47	GC10M052760	6.47	https://www.genecards.org/cgi-bin/carddisp.pl?gene=MBL2															MT-TI
																		EPB42	Erythrocyte Membrane Protein Band 4.2	Protein Coding	39	GC15M043214	6.46	https://www.genecards.org/cgi-bin/carddisp.pl?gene=EPB42															MT-TK
																		CXCR4	C-X-C Motif Chemokine Receptor 4	Protein Coding	52	GC02M136114	6.46	https://www.genecards.org/cgi-bin/carddisp.pl?gene=CXCR4															MT-TL1
																		SLC39A14	Solute Carrier Family 39 Member 14	Protein Coding	43	GC08P022367	6.46	https://www.genecards.org/cgi-bin/carddisp.pl?gene=SLC39A14															MT-TL2
																		STEAP3	STEAP3 Metalloreductase	Protein Coding	45	GC02P119222	6.45	https://www.genecards.org/cgi-bin/carddisp.pl?gene=STEAP3															MT-TN
																		PPIA	Peptidylprolyl Isomerase A	Protein Coding	47	GC07P044807	6.45	https://www.genecards.org/cgi-bin/carddisp.pl?gene=PPIA															MTTP
																		VIM	Vimentin	Protein Coding	50	GC10P017227	6.44	https://www.genecards.org/cgi-bin/carddisp.pl?gene=VIM															MT-TP
																		MEG8	Maternally Expressed 8, Small Nucleolar RNA Host Gene	RNA Gene	20	GC14P104772	6.43	https://www.genecards.org/cgi-bin/carddisp.pl?gene=MEG8															MT-TQ
																		TFEB	Transcription Factor EB	Protein Coding	42	GC06M042295	6.43	https://www.genecards.org/cgi-bin/carddisp.pl?gene=TFEB															MT-TS1
																		SYNE3	Spectrin Repeat Containing Nuclear Envelope Family Member 3	Protein Coding	34	GC14M095408	6.42	https://www.genecards.org/cgi-bin/carddisp.pl?gene=SYNE3															MT-TS2
																		TGFBR1	Transforming Growth Factor Beta Receptor 1	Protein Coding	52	GC09P099104	6.42	https://www.genecards.org/cgi-bin/carddisp.pl?gene=TGFBR1															MT-TT
																		KLF10	Kruppel Like Factor 10	Protein Coding	42	GC08M102648	6.42	https://www.genecards.org/cgi-bin/carddisp.pl?gene=KLF10															MT-TV
																		FCGR2A	Fc Fragment Of IgG Receptor IIa	Protein Coding	45	GC01P161505	6.42	https://www.genecards.org/cgi-bin/carddisp.pl?gene=FCGR2A															MT-TW
																		SOD3	Superoxide Dismutase 3	Protein Coding	40	GC04P024798	6.41	https://www.genecards.org/cgi-bin/carddisp.pl?gene=SOD3															MT-TY
																		GBE1	1,4-Alpha-Glucan Branching Enzyme 1	Protein Coding	44	GC03M081489	6.41	https://www.genecards.org/cgi-bin/carddisp.pl?gene=GBE1															MTUS1
																		BAX	BCL2 Associated X, Apoptosis Regulator	Protein Coding	48	GC19P048954	6.4	https://www.genecards.org/cgi-bin/carddisp.pl?gene=BAX															MVCD1
																		LEMD2	LEM Domain Nuclear Envelope Protein 2	Protein Coding	39	GC06M033772	6.4	https://www.genecards.org/cgi-bin/carddisp.pl?gene=LEMD2															MVCD2
																		RND2	Rho Family GTPase 2	Protein Coding	36	GC17P043995	6.39	https://www.genecards.org/cgi-bin/carddisp.pl?gene=RND2															MVCD3
																		GRB10	Growth Factor Receptor Bound Protein 10	Protein Coding	43	GC07M050590	6.39	https://www.genecards.org/cgi-bin/carddisp.pl?gene=GRB10															MVCD4
																		TRIT1	TRNA Isopentenyltransferase 1	Protein Coding	41	GC01M039842	6.38	https://www.genecards.org/cgi-bin/carddisp.pl?gene=TRIT1															MVCD5
																		TACO1	Translational Activator Of Cytochrome C Oxidase I	Protein Coding	39	GC17P063600	6.38	https://www.genecards.org/cgi-bin/carddisp.pl?gene=TACO1															MVCD6
																		COL3A1	Collagen Type III Alpha 1 Chain	Protein Coding	47	GC02P188974	6.37	https://www.genecards.org/cgi-bin/carddisp.pl?gene=COL3A1															MVCD7
																		PAPPA	Pappalysin 1	Protein Coding	41	GC09P116179	6.36	https://www.genecards.org/cgi-bin/carddisp.pl?gene=PAPPA															MX1
																		NEK9	NIMA Related Kinase 9	Protein Coding	45	GC14M075079	6.36	https://www.genecards.org/cgi-bin/carddisp.pl?gene=NEK9															Mx2
																		CLU	Clusterin	Protein Coding	46	GC08M027596	6.34	https://www.genecards.org/cgi-bin/carddisp.pl?gene=CLU															MYBPC1
																		SLC9A1	Solute Carrier Family 9 Member A1	Protein Coding	51	GC01M027109	6.32	https://www.genecards.org/cgi-bin/carddisp.pl?gene=SLC9A1															MYBPC2
																		SLC19A1	Solute Carrier Family 19 Member 1	Protein Coding	45	GC21M045493	6.31	https://www.genecards.org/cgi-bin/carddisp.pl?gene=SLC19A1															MYBPC3
																		VPS13B	Vacuolar Protein Sorting 13 Homolog B	Protein Coding	39	GC08P099011	6.3	https://www.genecards.org/cgi-bin/carddisp.pl?gene=VPS13B															MYBPH
																		NPHP3	Nephrocystin 3	Protein Coding	39	GC03M132683	6.3	https://www.genecards.org/cgi-bin/carddisp.pl?gene=NPHP3															MYC
																		FLAD1	Flavin Adenine Dinucleotide Synthetase 1	Protein Coding	41	GC01P154983	6.28	https://www.genecards.org/cgi-bin/carddisp.pl?gene=FLAD1															MYD88
																		GCM2	Glial Cells Missing Transcription Factor 2	Protein Coding	41	GC06M010873	6.28	https://www.genecards.org/cgi-bin/carddisp.pl?gene=GCM2															MYH6
																		FECH	Ferrochelatase	Protein Coding	45	GC18M057544	6.27	https://www.genecards.org/cgi-bin/carddisp.pl?gene=FECH															MYH7
																		ERFE	Erythroferrone	Protein Coding	24	GC02P238159	6.24	https://www.genecards.org/cgi-bin/carddisp.pl?gene=ERFE															MYH7B
																		OCA2	OCA2 Melanosomal Transmembrane Protein	Protein Coding	43	GC15M027754	6.23	https://www.genecards.org/cgi-bin/carddisp.pl?gene=OCA2															MYH9
																		LEF1	Lymphoid Enhancer Binding Factor 1	Protein Coding	47	GC04M108047	6.23	https://www.genecards.org/cgi-bin/carddisp.pl?gene=LEF1															MYHCA
																		FOXO3	Forkhead Box O3	Protein Coding	44	GC06P108559	6.22	https://www.genecards.org/cgi-bin/carddisp.pl?gene=FOXO3															MYL2
																		CD44	CD44 Molecule (Indian Blood Group)	Protein Coding	47	GC11P035139	6.22	https://www.genecards.org/cgi-bin/carddisp.pl?gene=CD44															MYL3
																		DDX3X	DEAD-Box Helicase 3 X-Linked	Protein Coding	47	GC0XP041333	6.2	https://www.genecards.org/cgi-bin/carddisp.pl?gene=DDX3X															MYLK2
																		SMAD2	SMAD Family Member 2	Protein Coding	47	GC18M047809	6.2	https://www.genecards.org/cgi-bin/carddisp.pl?gene=SMAD2															MYO6
																		CYP2D6	Cytochrome P450 Family 2 Subfamily D Member 6	Protein Coding	48	GC22M042126	6.2	https://www.genecards.org/cgi-bin/carddisp.pl?gene=CYP2D6															MYO7A
																		IGFBP7	Insulin Like Growth Factor Binding Protein 7	Protein Coding	45	GC04M057030	6.2	https://www.genecards.org/cgi-bin/carddisp.pl?gene=IGFBP7															MYOCD
																		SLC9B1	Solute Carrier Family 9 Member B1	Protein Coding	33	GC04M102885	6.2	https://www.genecards.org/cgi-bin/carddisp.pl?gene=SLC9B1															MYOCOZ
																		S100B	S100 Calcium Binding Protein B	Protein Coding	45	GC21M047431	6.2	https://www.genecards.org/cgi-bin/carddisp.pl?gene=S100B															MYOD1
																		ATP4A	ATPase H+/K+ Transporting Subunit Alpha	Protein Coding	41	GC19M042544	6.2	https://www.genecards.org/cgi-bin/carddisp.pl?gene=ATP4A															MYOSPRYN
																		EYA1	EYA Transcriptional Coactivator And Phosphatase 1	Protein Coding	45	GC08M071210	6.2	https://www.genecards.org/cgi-bin/carddisp.pl?gene=EYA1															MYOT
																		EFEMP1	EGF Containing Fibulin Extracellular Matrix Protein 1	Protein Coding	44	GC02M055865	6.19	https://www.genecards.org/cgi-bin/carddisp.pl?gene=EFEMP1															MYOZ2
																		RUNX2	RUNX Family Transcription Factor 2	Protein Coding	47	GC06P047549	6.19	https://www.genecards.org/cgi-bin/carddisp.pl?gene=RUNX2															MYPN
																		CLPX	Caseinolytic Mitochondrial Matrix Peptidase Chaperone Subunit X	Protein Coding	39	GC15M065148	6.18	https://www.genecards.org/cgi-bin/carddisp.pl?gene=CLPX															NAGA
																		CEACAM5	CEA Cell Adhesion Molecule 5	Protein Coding	41	GC19P041709	6.18	https://www.genecards.org/cgi-bin/carddisp.pl?gene=CEACAM5															NAGLU
																		MRRF	Mitochondrial Ribosome Recycling Factor	Protein Coding	39	GC09P122264	6.17	https://www.genecards.org/cgi-bin/carddisp.pl?gene=MRRF															NAMPT
																		RECK	Reversion Inducing Cysteine Rich Protein With Kazal Motifs	Protein Coding	40	GC09P036036	6.17	https://www.genecards.org/cgi-bin/carddisp.pl?gene=RECK															NANOG
																		ADA	Adenosine Deaminase	Protein Coding	51	GC20M044620	6.17	https://www.genecards.org/cgi-bin/carddisp.pl?gene=ADA															NCAM1
																		CFH	Complement Factor H	Protein Coding	45	GC01P196621	6.16	https://www.genecards.org/cgi-bin/carddisp.pl?gene=CFH															NCF1
																		ACHE	Acetylcholinesterase (Cartwright Blood Group)	Protein Coding	45	GC07M100889	6.15	https://www.genecards.org/cgi-bin/carddisp.pl?gene=ACHE															NCS1
																		KRT8	Keratin 8	Protein Coding	47	GC12M052897	6.15	https://www.genecards.org/cgi-bin/carddisp.pl?gene=KRT8															NDH
																		MGP	Matrix Gla Protein	Protein Coding	42	GC12M014881	6.14	https://www.genecards.org/cgi-bin/carddisp.pl?gene=MGP															NDUFA1
																		NEK2	NIMA Related Kinase 2	Protein Coding	50	GC01M211658	6.14	https://www.genecards.org/cgi-bin/carddisp.pl?gene=NEK2															NDUFA10
																		FSCN2	Fascin Actin-Bundling Protein 2, Retinal	Protein Coding	39	GC17P081517	6.14	https://www.genecards.org/cgi-bin/carddisp.pl?gene=FSCN2															NDUFA11
																		CPT1B	Carnitine Palmitoyltransferase 1B	Protein Coding	44	GC22M050569	6.13	https://www.genecards.org/cgi-bin/carddisp.pl?gene=CPT1B															NDUFA12
																		ALAS1	5'-Aminolevulinate Synthase 1	Protein Coding	44	GC03P052198	6.12	https://www.genecards.org/cgi-bin/carddisp.pl?gene=ALAS1															NDUFA13
																		DPP6	Dipeptidyl Peptidase Like 6	Protein Coding	43	GC07P153748	6.12	https://www.genecards.org/cgi-bin/carddisp.pl?gene=DPP6															NDUFA2
																		IRF3	Interferon Regulatory Factor 3	Protein Coding	47	GC19M049659	6.1	https://www.genecards.org/cgi-bin/carddisp.pl?gene=IRF3															NDUFA6
																		SP3	Sp3 Transcription Factor	Protein Coding	42	GC02M173882	6.09	https://www.genecards.org/cgi-bin/carddisp.pl?gene=SP3															NDUFA9
																		XPNPEP3	X-Prolyl Aminopeptidase 3	Protein Coding	41	GC22P040857	6.08	https://www.genecards.org/cgi-bin/carddisp.pl?gene=XPNPEP3															NDUFAF1
																		SLC4A1	Solute Carrier Family 4 Member 1 (Diego Blood Group)	Protein Coding	47	GC17M044282	6.08	https://www.genecards.org/cgi-bin/carddisp.pl?gene=SLC4A1															NDUFAF2
																		ATP2B3	ATPase Plasma Membrane Ca2+ Transporting 3	Protein Coding	47	GC0XP153517	6.07	https://www.genecards.org/cgi-bin/carddisp.pl?gene=ATP2B3															NDUFAF3
																		FABP12	Fatty Acid Binding Protein 12	Protein Coding	31	GC08M081524	6.07	https://www.genecards.org/cgi-bin/carddisp.pl?gene=FABP12															NDUFAF4
																		TFB1M	Transcription Factor B1, Mitochondrial	Protein Coding	42	GC06M155247	6.06	https://www.genecards.org/cgi-bin/carddisp.pl?gene=TFB1M															NDUFAF5
																		FH	Fumarate Hydratase	Protein Coding	45	GC01M241499	6.05	https://www.genecards.org/cgi-bin/carddisp.pl?gene=FH															NDUFAF6
																		AQR	Aquarius Intron-Binding Spliceosomal Factor	Protein Coding	36	GC15M034851	6.05	https://www.genecards.org/cgi-bin/carddisp.pl?gene=AQR															NDUFAF8
																		NHLRC1	NHL Repeat Containing E3 Ubiquitin Protein Ligase 1	Protein Coding	40	GC06M018065	6.05	https://www.genecards.org/cgi-bin/carddisp.pl?gene=NHLRC1															NDUFB10
																		U2AF1	U2 Small Nuclear RNA Auxiliary Factor 1	Protein Coding	41	GC21M043092	6.04	https://www.genecards.org/cgi-bin/carddisp.pl?gene=U2AF1															NDUFB11
																		GHSR	Growth Hormone Secretagogue Receptor	Protein Coding	47	GC03M172443	6.03	https://www.genecards.org/cgi-bin/carddisp.pl?gene=GHSR															NDUFB3
																		PDK4	Pyruvate Dehydrogenase Kinase 4	Protein Coding	45	GC07M095583	6.03	https://www.genecards.org/cgi-bin/carddisp.pl?gene=PDK4															NDUFB6
																		KIF3A	Kinesin Family Member 3A	Protein Coding	41	GC05M132689	6.02	https://www.genecards.org/cgi-bin/carddisp.pl?gene=KIF3A															NDUFB8
																		CISD3	CDGSH Iron Sulfur Domain 3	Protein Coding	30	GC17P038730	6.02	https://www.genecards.org/cgi-bin/carddisp.pl?gene=CISD3															NDUFB9
																		CACNA2D1	Calcium Voltage-Gated Channel Auxiliary Subunit Alpha2delta 1	Protein Coding	45	GC07M081946	6	https://www.genecards.org/cgi-bin/carddisp.pl?gene=CACNA2D1															NDUFS1
																		KMT2D	Lysine Methyltransferase 2D	Protein Coding	41	GC12M049018	6	https://www.genecards.org/cgi-bin/carddisp.pl?gene=KMT2D															NDUFS2
																		WT1	WT1 Transcription Factor	Protein Coding	49	GC11M032365	5.99	https://www.genecards.org/cgi-bin/carddisp.pl?gene=WT1															NDUFS3
																		MIR106B	MicroRNA 106b	RNA Gene	21	GC07M100284	5.99	https://www.genecards.org/cgi-bin/carddisp.pl?gene=MIR106B															NDUFS4
																		DNMT1	DNA Methyltransferase 1	Protein Coding	50	GC19M010133	5.99	https://www.genecards.org/cgi-bin/carddisp.pl?gene=DNMT1															NDUFS6
																		NPM1	Nucleophosmin 1	Protein Coding	50	GC05P171387	5.98	https://www.genecards.org/cgi-bin/carddisp.pl?gene=NPM1															NDUFS7
																		LPIN2	Lipin 2	Protein Coding	42	GC18M002906	5.98	https://www.genecards.org/cgi-bin/carddisp.pl?gene=LPIN2															NDUFS8
																		ERCC2	ERCC Excision Repair 2, TFIIH Core Complex Helicase Subunit	Protein Coding	47	GC19M045349	5.98	https://www.genecards.org/cgi-bin/carddisp.pl?gene=ERCC2															NDUFV1
																		SLC25A28	Solute Carrier Family 25 Member 28	Protein Coding	38	GC10M099610	5.97	https://www.genecards.org/cgi-bin/carddisp.pl?gene=SLC25A28															NDUFV2
																		SLC26A4	Solute Carrier Family 26 Member 4	Protein Coding	43	GC07P107660	5.97	https://www.genecards.org/cgi-bin/carddisp.pl?gene=SLC26A4															NEAT1
																		CDC42SE1	CDC42 Small Effector 1	Protein Coding	33	GC01M151050	5.97	https://www.genecards.org/cgi-bin/carddisp.pl?gene=CDC42SE1															NEB
																		NTS	Neurotensin	Protein Coding	40	GC12P085876	5.97	https://www.genecards.org/cgi-bin/carddisp.pl?gene=NTS															NEBL
																		HNRNPA2B1	Heterogeneous Nuclear Ribonucleoprotein A2/B1	Protein Coding	45	GC07M026174	5.96	https://www.genecards.org/cgi-bin/carddisp.pl?gene=HNRNPA2B1															NECTIN1
																		DKC1	Dyskerin Pseudouridine Synthase 1	Protein Coding	46	GC0XP154762	5.95	https://www.genecards.org/cgi-bin/carddisp.pl?gene=DKC1															NEDD4L
																		STAT5A	Signal Transducer And Activator Of Transcription 5A	Protein Coding	45	GC17P042287	5.95	https://www.genecards.org/cgi-bin/carddisp.pl?gene=STAT5A															NEK2
																		ATXN1	Ataxin 1	Protein Coding	43	GC06M016299	5.95	https://www.genecards.org/cgi-bin/carddisp.pl?gene=ATXN1															NEK8
																		SCG5	Secretogranin V	Protein Coding	38	GC15P032641	5.94	https://www.genecards.org/cgi-bin/carddisp.pl?gene=SCG5															NEK9
																		GFM2	GTP Dependent Ribosome Recycling Factor Mitochondrial 2	Protein Coding	39	GC05M074721	5.94	https://www.genecards.org/cgi-bin/carddisp.pl?gene=GFM2															NELIN
																		SOS2	SOS Ras/Rho Guanine Nucleotide Exchange Factor 2	Protein Coding	45	GC14M050117	5.93	https://www.genecards.org/cgi-bin/carddisp.pl?gene=SOS2															NEM11
																		MIR19A	MicroRNA 19a	RNA Gene	19	GC13P091433	5.93	https://www.genecards.org/cgi-bin/carddisp.pl?gene=MIR19A															NEO1
																		MIR122	MicroRNA 122	RNA Gene	21	GC18P058451	5.93	https://www.genecards.org/cgi-bin/carddisp.pl?gene=MIR122															NEU1
																		EIF2AK1	Eukaryotic Translation Initiation Factor 2 Alpha Kinase 1	Protein Coding	42	GC07M006022	5.93	https://www.genecards.org/cgi-bin/carddisp.pl?gene=EIF2AK1															NEUROD1
																		PRKCD	Protein Kinase C Delta	Protein Coding	53	GC03P053156	5.92	https://www.genecards.org/cgi-bin/carddisp.pl?gene=PRKCD															NEXN
																		MYBPH	Myosin Binding Protein H	Protein Coding	37	GC01M203136	5.92	https://www.genecards.org/cgi-bin/carddisp.pl?gene=MYBPH															NF1
																		PUS10	Pseudouridine Synthase 10	Protein Coding	35	GC02M060940	5.9	https://www.genecards.org/cgi-bin/carddisp.pl?gene=PUS10															NFE2L2
																		SLPI	Secretory Leukocyte Peptidase Inhibitor	Protein Coding	39	GC20M045252	5.9	https://www.genecards.org/cgi-bin/carddisp.pl?gene=SLPI															NFKB1
																		ATXN3	Ataxin 3	Protein Coding	44	GC14M094059	5.88	https://www.genecards.org/cgi-bin/carddisp.pl?gene=ATXN3															NFKBIA
																		NTRK1	Neurotrophic Receptor Tyrosine Kinase 1	Protein Coding	48	GC01P156786	5.88	https://www.genecards.org/cgi-bin/carddisp.pl?gene=NTRK1															NGF
																		ABCB1	ATP Binding Cassette Subfamily B Member 1	Protein Coding	51	GC07M087504	5.87	https://www.genecards.org/cgi-bin/carddisp.pl?gene=ABCB1															NGFR
																		MRAS	Muscle RAS Oncogene Homolog	Protein Coding	45	GC03P138347	5.87	https://www.genecards.org/cgi-bin/carddisp.pl?gene=MRAS															NHLRC1
																		PSMD5	Proteasome 26S Subunit, Non-ATPase 5	Protein Coding	38	GC09M120815	5.86	https://www.genecards.org/cgi-bin/carddisp.pl?gene=PSMD5															NIDDM1
																		SMAD3	SMAD Family Member 3	Protein Coding	49	GC15P067063	5.86	https://www.genecards.org/cgi-bin/carddisp.pl?gene=SMAD3															NIDDM2
																		CXADR	CXADR Ig-Like Cell Adhesion Molecule	Protein Coding	43	GC21P017512	5.85	https://www.genecards.org/cgi-bin/carddisp.pl?gene=CXADR															NIDDM4
																		TRMT1	TRNA Methyltransferase 1	Protein Coding	41	GC19M013104	5.85	https://www.genecards.org/cgi-bin/carddisp.pl?gene=TRMT1															NIDDM5
																		PARK7	Parkinsonism Associated Deglycase	Protein Coding	45	GC01P007983	5.85	https://www.genecards.org/cgi-bin/carddisp.pl?gene=PARK7															NKILA
																		PANK1	Pantothenate Kinase 1	Protein Coding	41	GC10M089579	5.85	https://www.genecards.org/cgi-bin/carddisp.pl?gene=PANK1															NKX2-5
																		CCL3	C-C Motif Chemokine Ligand 3	Protein Coding	39	GC17M036088	5.85	https://www.genecards.org/cgi-bin/carddisp.pl?gene=CCL3															NLRP3
																		CEP295	Centrosomal Protein 295	Protein Coding	28	GC11P093661	5.84	https://www.genecards.org/cgi-bin/carddisp.pl?gene=CEP295															NLRP5
																		ATP12A	ATPase H+/K+ Transporting Non-Gastric Alpha2 Subunit	Protein Coding	43	GC13P024680	5.84	https://www.genecards.org/cgi-bin/carddisp.pl?gene=ATP12A															NNAT
																		ATP13A2	ATPase Cation Transporting 13A2	Protein Coding	42	GC01M016985	5.84	https://www.genecards.org/cgi-bin/carddisp.pl?gene=ATP13A2															NNT
																		METTL1	Methyltransferase Like 1	Protein Coding	42	GC12M057768	5.84	https://www.genecards.org/cgi-bin/carddisp.pl?gene=METTL1															NOD2
																		PHB	Prohibitin	Protein Coding	47	GC17M049404	5.84	https://www.genecards.org/cgi-bin/carddisp.pl?gene=PHB															NODAL
																		KCNE2	Potassium Voltage-Gated Channel Subfamily E Regulatory Subunit 2	Protein Coding	41	GC21P034364	5.83	https://www.genecards.org/cgi-bin/carddisp.pl?gene=KCNE2															NOP2
																		HLA-DMA	Major Histocompatibility Complex, Class II, DM Alpha	Protein Coding	40	GC06M032950	5.83	https://www.genecards.org/cgi-bin/carddisp.pl?gene=HLA-DMA															NOS1
																		EPRS1	Glutamyl-Prolyl-TRNA Synthetase 1	Protein Coding	36	GC01M219969	5.82	https://www.genecards.org/cgi-bin/carddisp.pl?gene=EPRS1															NOS2
																		WDR4	WD Repeat Domain 4	Protein Coding	38	GC21M042843	5.82	https://www.genecards.org/cgi-bin/carddisp.pl?gene=WDR4															NOS3
																		TRMT61A	TRNA Methyltransferase 61A	Protein Coding	32	GC14P103529	5.82	https://www.genecards.org/cgi-bin/carddisp.pl?gene=TRMT61A															NOTCH1
																		SLC39A8	Solute Carrier Family 39 Member 8	Protein Coding	43	GC04M102252	5.82	https://www.genecards.org/cgi-bin/carddisp.pl?gene=SLC39A8															NOX4
																		FGF23	Fibroblast Growth Factor 23	Protein Coding	45	GC12M004368	5.81	https://www.genecards.org/cgi-bin/carddisp.pl?gene=FGF23															NPC1
																		OLR1	Oxidized Low Density Lipoprotein Receptor 1	Protein Coding	44	GC12M013864	5.81	https://www.genecards.org/cgi-bin/carddisp.pl?gene=OLR1															NPHP1
																		MPV17	Mitochondrial Inner Membrane Protein MPV17	Protein Coding	41	GC02M027309	5.81	https://www.genecards.org/cgi-bin/carddisp.pl?gene=MPV17															NPHP3
																		TNFRSF11A	TNF Receptor Superfamily Member 11a	Protein Coding	45	GC18P062325	5.8	https://www.genecards.org/cgi-bin/carddisp.pl?gene=TNFRSF11A															NPHS1
																		SLC6A3	Solute Carrier Family 6 Member 3	Protein Coding	49	GC05M001392	5.8	https://www.genecards.org/cgi-bin/carddisp.pl?gene=SLC6A3															NPM1
																		HSD17B10	Hydroxysteroid 17-Beta Dehydrogenase 10	Protein Coding	45	GC0XM053431	5.8	https://www.genecards.org/cgi-bin/carddisp.pl?gene=HSD17B10															NPPA
																		ZNHIT3	Zinc Finger HIT-Type Containing 3	Protein Coding	36	GC17P036486	5.79	https://www.genecards.org/cgi-bin/carddisp.pl?gene=ZNHIT3															NPPB
																		ACTN1	Actinin Alpha 1	Protein Coding	50	GC14M068874	5.79	https://www.genecards.org/cgi-bin/carddisp.pl?gene=ACTN1															NPPC
																		NRF1	Nuclear Respiratory Factor 1	Protein Coding	43	GC07P129611	5.77	https://www.genecards.org/cgi-bin/carddisp.pl?gene=NRF1															NPPS
																		CDH1	Cadherin 1	Protein Coding	50	GC16P068737	5.76	https://www.genecards.org/cgi-bin/carddisp.pl?gene=CDH1															NPTX2
																		MPP2	Membrane Palmitoylated Protein 2	Protein Coding	37	GC17M043875	5.76	https://www.genecards.org/cgi-bin/carddisp.pl?gene=MPP2															NPY
																		CRAT	Carnitine O-Acetyltransferase	Protein Coding	44	GC09M129094	5.75	https://www.genecards.org/cgi-bin/carddisp.pl?gene=CRAT															NR1H2
																		COQ6	Coenzyme Q6, Monooxygenase	Protein Coding	42	GC14P073949	5.74	https://www.genecards.org/cgi-bin/carddisp.pl?gene=COQ6															NR1H4
																		BMPER	BMP Binding Endothelial Regulator	Protein Coding	39	GC07P033944	5.74	https://www.genecards.org/cgi-bin/carddisp.pl?gene=BMPER															NR1I2
																		BDKRB2	Bradykinin Receptor B2	Protein Coding	44	GC14P096205	5.73	https://www.genecards.org/cgi-bin/carddisp.pl?gene=BDKRB2															NR3C1
																		PROC	Protein C, Inactivator Of Coagulation Factors Va And VIIIa	Protein Coding	49	GC02P127418	5.72	https://www.genecards.org/cgi-bin/carddisp.pl?gene=PROC															NR3C2
																		UROD	Uroporphyrinogen Decarboxylase	Protein Coding	45	GC01P045012	5.72	https://www.genecards.org/cgi-bin/carddisp.pl?gene=UROD															NRAP
																		CDKN1B	Cyclin Dependent Kinase Inhibitor 1B	Protein Coding	48	GC12P012716	5.71	https://www.genecards.org/cgi-bin/carddisp.pl?gene=CDKN1B															NRAS
																		ADAT3	Adenosine Deaminase TRNA Specific 3	Protein Coding	35	GC19P001906	5.71	https://www.genecards.org/cgi-bin/carddisp.pl?gene=ADAT3															NRF1
																		GAP43	Growth Associated Protein 43	Protein Coding	43	GC03P115623	5.71	https://www.genecards.org/cgi-bin/carddisp.pl?gene=GAP43															NRG1
																		ATP2A3	ATPase Sarcoplasmic/Endoplasmic Reticulum Ca2+ Transporting 3	Protein Coding	44	GC17M003923	5.7	https://www.genecards.org/cgi-bin/carddisp.pl?gene=ATP2A3															NS5
																		TGFBR2	Transforming Growth Factor Beta Receptor 2	Protein Coding	51	GC03P030623	5.69	https://www.genecards.org/cgi-bin/carddisp.pl?gene=TGFBR2															NSD1
																		SLC33A1	Solute Carrier Family 33 Member 1	Protein Coding	43	GC03M155821	5.69	https://www.genecards.org/cgi-bin/carddisp.pl?gene=SLC33A1															NSUN2
																		ADORA1	Adenosine A1 Receptor	Protein Coding	47	GC01P203090	5.69	https://www.genecards.org/cgi-bin/carddisp.pl?gene=ADORA1															NSUN5
																		DDIT3	DNA Damage Inducible Transcript 3	Protein Coding	45	GC12M057516	5.68	https://www.genecards.org/cgi-bin/carddisp.pl?gene=DDIT3															NSUN6
																		TXN	Thioredoxin	Protein Coding	45	GC09M110243	5.68	https://www.genecards.org/cgi-bin/carddisp.pl?gene=TXN															NTRK1
																		TYR	Tyrosinase	Protein Coding	47	GC11P089177	5.68	https://www.genecards.org/cgi-bin/carddisp.pl?gene=TYR															NTS
																		FCGR3B	Fc Fragment Of IgG Receptor IIIb	Protein Coding	42	GC01M161623	5.67	https://www.genecards.org/cgi-bin/carddisp.pl?gene=FCGR3B															Ntsr2
																		SMURF1	SMAD Specific E3 Ubiquitin Protein Ligase 1	Protein Coding	45	GC07M099027	5.67	https://www.genecards.org/cgi-bin/carddisp.pl?gene=SMURF1															NUBPL
																		DSG3	Desmoglein 3	Protein Coding	38	GC18P031447	5.67	https://www.genecards.org/cgi-bin/carddisp.pl?gene=DSG3															NUDT10
																		TRPM7	Transient Receptor Potential Cation Channel Subfamily M Member 7	Protein Coding	45	GC15M050552	5.67	https://www.genecards.org/cgi-bin/carddisp.pl?gene=TRPM7															OCA2
																		SERPINA7	Serpin Family A Member 7	Protein Coding	39	GC0XM106032	5.67	https://www.genecards.org/cgi-bin/carddisp.pl?gene=SERPINA7															ODAG
																		PEG3	Paternally Expressed 3	Protein Coding	38	GC19M056810	5.66	https://www.genecards.org/cgi-bin/carddisp.pl?gene=PEG3															OFD1
																		SLC52A3	Solute Carrier Family 52 Member 3	Protein Coding	39	GC20M000741	5.65	https://www.genecards.org/cgi-bin/carddisp.pl?gene=SLC52A3															OGA
																		FIP1L1	Factor Interacting With PAPOLA And CPSF1	Protein Coding	38	GC04P053386	5.64	https://www.genecards.org/cgi-bin/carddisp.pl?gene=FIP1L1															OLR1
																		TARBP1	TAR (HIV-1) RNA Binding Protein 1	Protein Coding	39	GC01M234391	5.64	https://www.genecards.org/cgi-bin/carddisp.pl?gene=TARBP1															OPA1
																		SNORD54	Small Nucleolar RNA, C/D Box 54	RNA Gene	16	GC08M056073	5.64	https://www.genecards.org/cgi-bin/carddisp.pl?gene=SNORD54															OPA3
																		SLC46A1	Solute Carrier Family 46 Member 1	Protein Coding	44	GC17M029956	5.63	https://www.genecards.org/cgi-bin/carddisp.pl?gene=SLC46A1															OPRM1
																		CKMT2	Creatine Kinase, Mitochondrial 2	Protein Coding	43	GC05P081232	5.63	https://www.genecards.org/cgi-bin/carddisp.pl?gene=CKMT2															OPTN
																		NANOG	Nanog Homeobox	Protein Coding	39	GC12P007787	5.63	https://www.genecards.org/cgi-bin/carddisp.pl?gene=NANOG															OTC
																		PUS3	Pseudouridine Synthase 3	Protein Coding	37	GC11M125893	5.61	https://www.genecards.org/cgi-bin/carddisp.pl?gene=PUS3															OTX2
																		DUS1L	Dihydrouridine Synthase 1 Like	Protein Coding	36	GC17M082057	5.61	https://www.genecards.org/cgi-bin/carddisp.pl?gene=DUS1L															P2RY12
																		TRMT6	TRNA Methyltransferase 6	Protein Coding	34	GC20M005937	5.61	https://www.genecards.org/cgi-bin/carddisp.pl?gene=TRMT6															P58
																		TRMT2B	TRNA Methyltransferase 2 Homolog B	Protein Coding	33	GC0XM100992	5.61	https://www.genecards.org/cgi-bin/carddisp.pl?gene=TRMT2B															PAEP
																		TRMO	TRNA Methyltransferase O	Protein Coding	28	GC09M097896	5.61	https://www.genecards.org/cgi-bin/carddisp.pl?gene=TRMO															PAGEN1
																		SNORD55	Small Nucleolar RNA, C/D Box 55	RNA Gene	16	GC01P044867	5.61	https://www.genecards.org/cgi-bin/carddisp.pl?gene=SNORD55															PAGR1
																		CYP11A1	Cytochrome P450 Family 11 Subfamily A Member 1	Protein Coding	48	GC15M074337	5.61	https://www.genecards.org/cgi-bin/carddisp.pl?gene=CYP11A1															PALB2
																		IFT80	Intraflagellar Transport 80	Protein Coding	37	GC03M160256	5.6	https://www.genecards.org/cgi-bin/carddisp.pl?gene=IFT80															PALLD
																		OPTN	Optineurin	Protein Coding	44	GC10P013099	5.6	https://www.genecards.org/cgi-bin/carddisp.pl?gene=OPTN															PANK1
																		WDR45	WD Repeat Domain 45	Protein Coding	40	GC0XM049074	5.59	https://www.genecards.org/cgi-bin/carddisp.pl?gene=WDR45															PANK2
																		TRIB3	Tribbles Pseudokinase 3	Protein Coding	43	GC20P000361	5.59	https://www.genecards.org/cgi-bin/carddisp.pl?gene=TRIB3															PAPPA
																		MMP7	Matrix Metallopeptidase 7	Protein Coding	48	GC11M102425	5.58	https://www.genecards.org/cgi-bin/carddisp.pl?gene=MMP7															PARK7
																		LOC108510657	Friedreich Ataxia Repeat Instability Region	Biological Region	1	GC09P069037	5.58	https://www.genecards.org/cgi-bin/carddisp.pl?gene=LOC108510657															PARP1
																		PSAP	Prosaposin	Protein Coding	46	GC10M071816	5.58	https://www.genecards.org/cgi-bin/carddisp.pl?gene=PSAP															PAX4
																		STAG2	Stromal Antigen 2	Protein Coding	44	GC0XP123960	5.58	https://www.genecards.org/cgi-bin/carddisp.pl?gene=STAG2															PAX6
																		GUCA1A	Guanylate Cyclase Activator 1A	Protein Coding	42	GC06P047516	5.58	https://www.genecards.org/cgi-bin/carddisp.pl?gene=GUCA1A															PBCA
																		SMCHD1	Structural Maintenance Of Chromosomes Flexible Hinge Domain Containing 1	Protein Coding	40	GC18P002649	5.58	https://www.genecards.org/cgi-bin/carddisp.pl?gene=SMCHD1															PBX1
																		PDE3B	Phosphodiesterase 3B	Protein Coding	43	GC11P014643	5.56	https://www.genecards.org/cgi-bin/carddisp.pl?gene=PDE3B															PC
																		TAC1	Tachykinin Precursor 1	Protein Coding	43	GC07P097731	5.56	https://www.genecards.org/cgi-bin/carddisp.pl?gene=TAC1															PCA1
																		XPC	XPC Complex Subunit, DNA Damage Recognition And Repair Factor	Protein Coding	45	GC03M015787	5.55	https://www.genecards.org/cgi-bin/carddisp.pl?gene=XPC															PCARE
																		EXOSC4	Exosome Component 4	Protein Coding	37	GC08P144079	5.52	https://www.genecards.org/cgi-bin/carddisp.pl?gene=EXOSC4															PCCA
																		LMOD1	Leiomodin 1	Protein Coding	40	GC01M201896	5.52	https://www.genecards.org/cgi-bin/carddisp.pl?gene=LMOD1															PCK2
																		CD1D	CD1d Molecule	Protein Coding	42	GC01P158178	5.51	https://www.genecards.org/cgi-bin/carddisp.pl?gene=CD1D															PCSK2
																		CDON	Cell Adhesion Associated, Oncogene Regulated	Protein Coding	45	GC11M125955	5.51	https://www.genecards.org/cgi-bin/carddisp.pl?gene=CDON															PCSK9
																		HNRNPA1	Heterogeneous Nuclear Ribonucleoprotein A1	Protein Coding	45	GC12P054280	5.51	https://www.genecards.org/cgi-bin/carddisp.pl?gene=HNRNPA1															PCTT
																		ZNF23	Zinc Finger Protein 23	Protein Coding	38	GC16M071463	5.51	https://www.genecards.org/cgi-bin/carddisp.pl?gene=ZNF23															PDCD1
																		ARNTL	Aryl Hydrocarbon Receptor Nuclear Translocator Like	Protein Coding	42	GC11P013276	5.5	https://www.genecards.org/cgi-bin/carddisp.pl?gene=ARNTL															PDE11A
																		HELLS	Helicase, Lymphoid Specific	Protein Coding	45	GC10P094501	5.5	https://www.genecards.org/cgi-bin/carddisp.pl?gene=HELLS															PDE3A
																		ARSA	Arylsulfatase A	Protein Coding	47	GC22M050622	5.5	https://www.genecards.org/cgi-bin/carddisp.pl?gene=ARSA															PDE3B
																		NCS1	Neuronal Calcium Sensor 1	Protein Coding	41	GC09P130172	5.5	https://www.genecards.org/cgi-bin/carddisp.pl?gene=NCS1															PDE5A
																		CSF1	Colony Stimulating Factor 1	Protein Coding	43	GC01P109911	5.5	https://www.genecards.org/cgi-bin/carddisp.pl?gene=CSF1															PDE6A
																		PIP5K1B	Phosphatidylinositol-4-Phosphate 5-Kinase Type 1 Beta	Protein Coding	43	GC09P068705	5.49	https://www.genecards.org/cgi-bin/carddisp.pl?gene=PIP5K1B															PDE6B
																		F5	Coagulation Factor V	Protein Coding	45	GC01M169511	5.49	https://www.genecards.org/cgi-bin/carddisp.pl?gene=F5															PDGFB
																		SACS	Sacsin Molecular Chaperone	Protein Coding	36	GC13M023328	5.48	https://www.genecards.org/cgi-bin/carddisp.pl?gene=SACS															PDGFRA
																		CEBPA	CCAAT Enhancer Binding Protein Alpha	Protein Coding	47	GC19M033299	5.47	https://www.genecards.org/cgi-bin/carddisp.pl?gene=CEBPA															PDGFRB
																		MIR27B	MicroRNA 27b	RNA Gene	21	GC09P095097	5.46	https://www.genecards.org/cgi-bin/carddisp.pl?gene=MIR27B															PDGFRL
																		AGPAT1	1-Acylglycerol-3-Phosphate O-Acyltransferase 1	Protein Coding	41	GC06M032168	5.46	https://www.genecards.org/cgi-bin/carddisp.pl?gene=AGPAT1															PDHA1
																		PRKACG	Protein Kinase CAMP-Activated Catalytic Subunit Gamma	Protein Coding	47	GC09M069013	5.46	https://www.genecards.org/cgi-bin/carddisp.pl?gene=PRKACG															PDK4
																		RHAG	Rh Associated Glycoprotein	Protein Coding	44	GC06M049605	5.46	https://www.genecards.org/cgi-bin/carddisp.pl?gene=RHAG															PDNP1
																		PRKCH	Protein Kinase C Eta	Protein Coding	50	GC14P061187	5.46	https://www.genecards.org/cgi-bin/carddisp.pl?gene=PRKCH															PDP1
																		ENTPD1	Ectonucleoside Triphosphate Diphosphohydrolase 1	Protein Coding	46	GC10P095711	5.45	https://www.genecards.org/cgi-bin/carddisp.pl?gene=ENTPD1															Pdp2
																		CROCC	Ciliary Rootlet Coiled-Coil, Rootletin	Protein Coding	35	GC01P016798	5.45	https://www.genecards.org/cgi-bin/carddisp.pl?gene=CROCC															PDSS1
																		ESRRA	Estrogen Related Receptor Alpha	Protein Coding	47	GC11P064305	5.44	https://www.genecards.org/cgi-bin/carddisp.pl?gene=ESRRA															PDSS2
																		GNAS-AS1	GNAS Antisense RNA 1	RNA Gene	22	GC20M058846	5.42	https://www.genecards.org/cgi-bin/carddisp.pl?gene=GNAS-AS1															PDX1
																		MAVS	Mitochondrial Antiviral Signaling Protein	Protein Coding	40	GC20P003827	5.42	https://www.genecards.org/cgi-bin/carddisp.pl?gene=MAVS															PECAM1
																		FREM2	FRAS1 Related Extracellular Matrix 2	Protein Coding	39	GC13P038687	5.42	https://www.genecards.org/cgi-bin/carddisp.pl?gene=FREM2															PEG10
																		MAFB	MAF BZIP Transcription Factor B	Protein Coding	43	GC20M040685	5.42	https://www.genecards.org/cgi-bin/carddisp.pl?gene=MAFB															PEG3
																		NGFR	Nerve Growth Factor Receptor	Protein Coding	45	GC17P049495	5.41	https://www.genecards.org/cgi-bin/carddisp.pl?gene=NGFR															Penk
																		C12orf65	Chromosome 12 Open Reading Frame 65	Protein Coding	36	GC12P123232	5.41	https://www.genecards.org/cgi-bin/carddisp.pl?gene=C12orf65															PEP
																		CIITA	Class II Major Histocompatibility Complex Transactivator	Protein Coding	45	GC16P010879	5.39	https://www.genecards.org/cgi-bin/carddisp.pl?gene=CIITA															PET117
																		SNTA1	Syntrophin Alpha 1	Protein Coding	43	GC20M033407	5.39	https://www.genecards.org/cgi-bin/carddisp.pl?gene=SNTA1															PEX1
																		FAM50B	Family With Sequence Similarity 50 Member B	Protein Coding	32	GC06P003836	5.38	https://www.genecards.org/cgi-bin/carddisp.pl?gene=FAM50B															PEX10
																		ZDBF2	Zinc Finger DBF-Type Containing 2	Protein Coding	32	GC02P206274	5.38	https://www.genecards.org/cgi-bin/carddisp.pl?gene=ZDBF2															PEX16
																		NLRP5	NLR Family Pyrin Domain Containing 5	Protein Coding	37	GC19P056000	5.38	https://www.genecards.org/cgi-bin/carddisp.pl?gene=NLRP5															PEX2
																		ATXN10	Ataxin 10	Protein Coding	42	GC22P045673	5.38	https://www.genecards.org/cgi-bin/carddisp.pl?gene=ATXN10															PEX3
																		ATXN8OS	ATXN8 Opposite Strand LncRNA	RNA Gene	26	GC13P070107	5.38	https://www.genecards.org/cgi-bin/carddisp.pl?gene=ATXN8OS															PEX5
																		IFNA2	Interferon Alpha 2	Protein Coding	41	GC09M021384	5.37	https://www.genecards.org/cgi-bin/carddisp.pl?gene=IFNA2															PEX6
																		MIR193B	MicroRNA 193b	RNA Gene	20	GC16P014307	5.34	https://www.genecards.org/cgi-bin/carddisp.pl?gene=MIR193B															PEX7
																		ADGRV1	Adhesion G Protein-Coupled Receptor V1	Protein Coding	35	GC05P090529	5.34	https://www.genecards.org/cgi-bin/carddisp.pl?gene=ADGRV1															PF4
																		NNAT	Neuronatin	Protein Coding	32	GC20P037521	5.33	https://www.genecards.org/cgi-bin/carddisp.pl?gene=NNAT															PFKM
																		RB1	RB Transcriptional Corepressor 1	Protein Coding	49	GC13P048303	5.33	https://www.genecards.org/cgi-bin/carddisp.pl?gene=RB1															PGC
																		SLC25A37	Solute Carrier Family 25 Member 37	Protein Coding	39	GC08P023528	5.33	https://www.genecards.org/cgi-bin/carddisp.pl?gene=SLC25A37															PGF
																		RPS3A	Ribosomal Protein S3A	Protein Coding	41	GC04P151099	5.32	https://www.genecards.org/cgi-bin/carddisp.pl?gene=RPS3A															PGL5
																		CDKN1A	Cyclin Dependent Kinase Inhibitor 1A	Protein Coding	50	GC06P047460	5.31	https://www.genecards.org/cgi-bin/carddisp.pl?gene=CDKN1A															PGM1
																		CNNM4	Cyclin And CBS Domain Divalent Metal Cation Transport Mediator 4	Protein Coding	39	GC02P096790	5.31	https://www.genecards.org/cgi-bin/carddisp.pl?gene=CNNM4															PHB
																		MX1	MX Dynamin Like GTPase 1	Protein Coding	41	GC21P041420	5.3	https://www.genecards.org/cgi-bin/carddisp.pl?gene=MX1															PHHI
																		ADH1B	Alcohol Dehydrogenase 1B (Class I), Beta Polypeptide	Protein Coding	43	GC04M099304	5.3	https://www.genecards.org/cgi-bin/carddisp.pl?gene=ADH1B															PHIP
																		DNMT3L	DNA Methyltransferase 3 Like	Protein Coding	41	GC21M044246	5.3	https://www.genecards.org/cgi-bin/carddisp.pl?gene=DNMT3L															PHYH
																		NDUFB6	NADH:Ubiquinone Oxidoreductase Subunit B6	Protein Coding	40	GC09M032553	5.3	https://www.genecards.org/cgi-bin/carddisp.pl?gene=NDUFB6															PIK3C2A
																		FGGY	FGGY Carbohydrate Kinase Domain Containing	Protein Coding	37	GC01P059296	5.3	https://www.genecards.org/cgi-bin/carddisp.pl?gene=FGGY															Pik3c2g
																		POTEF	POTE Ankyrin Domain Family Member F	Protein Coding	28	GC02M130073	5.29	https://www.genecards.org/cgi-bin/carddisp.pl?gene=POTEF															PIK3CA
																		LTBP4	Latent Transforming Growth Factor Beta Binding Protein 4	Protein Coding	40	GC19P040592	5.29	https://www.genecards.org/cgi-bin/carddisp.pl?gene=LTBP4															PIK3CB
																		HLA-G	Major Histocompatibility Complex, Class I, G	Protein Coding	44	GC06P047256	5.28	https://www.genecards.org/cgi-bin/carddisp.pl?gene=HLA-G															PIK3CD
																		CTCF	CCCTC-Binding Factor	Protein Coding	46	GC16P067563	5.28	https://www.genecards.org/cgi-bin/carddisp.pl?gene=CTCF															PIK3CG
																		MIR130A	MicroRNA 130a	RNA Gene	20	GC11P057641	5.28	https://www.genecards.org/cgi-bin/carddisp.pl?gene=MIR130A															PIM1
																		ITPR2	Inositol 1,4,5-Trisphosphate Receptor Type 2	Protein Coding	45	GC12M026336	5.27	https://www.genecards.org/cgi-bin/carddisp.pl?gene=ITPR2															PINCH2
																		MDM2	MDM2 Proto-Oncogene	Protein Coding	52	GC12P068808	5.26	https://www.genecards.org/cgi-bin/carddisp.pl?gene=MDM2															PINK1
																		TAC3	Tachykinin Precursor 3	Protein Coding	45	GC12M057009	5.26	https://www.genecards.org/cgi-bin/carddisp.pl?gene=TAC3															PIP5K1B
																		CFD	Complement Factor D	Protein Coding	44	GC19P000859	5.26	https://www.genecards.org/cgi-bin/carddisp.pl?gene=CFD															PKD2
																		ITGB6	Integrin Subunit Beta 6	Protein Coding	47	GC02M160099	5.26	https://www.genecards.org/cgi-bin/carddisp.pl?gene=ITGB6															PKLR
																		M6PR	Mannose-6-Phosphate Receptor, Cation Dependent	Protein Coding	43	GC12M008955	5.24	https://www.genecards.org/cgi-bin/carddisp.pl?gene=M6PR															Pla2g2a
																		ABCB11	ATP Binding Cassette Subfamily B Member 11	Protein Coding	45	GC02M168922	5.24	https://www.genecards.org/cgi-bin/carddisp.pl?gene=ABCB11															PLA2G6
																		HUWE1	HECT, UBA And WWE Domain Containing E3 Ubiquitin Protein Ligase 1	Protein Coding	44	GC0XM053532	5.24	https://www.genecards.org/cgi-bin/carddisp.pl?gene=HUWE1															PLA2G7
																		PTRH2	Peptidyl-TRNA Hydrolase 2	Protein Coding	44	GC17M059674	5.23	https://www.genecards.org/cgi-bin/carddisp.pl?gene=PTRH2															PLAGL1
																		SLC4A5	Solute Carrier Family 4 Member 5	Protein Coding	41	GC02M074217	5.23	https://www.genecards.org/cgi-bin/carddisp.pl?gene=SLC4A5															PLAT
																		MAS1L	MAS1 Proto-Oncogene Like, G Protein-Coupled Receptor	Protein Coding	35	GC06M029504	5.23	https://www.genecards.org/cgi-bin/carddisp.pl?gene=MAS1L															PLB
																		LOC113687175	Sharpr-MPRA Regulatory Region 4647	Biological Region	1	GC07P100626	5.23	https://www.genecards.org/cgi-bin/carddisp.pl?gene=LOC113687175															PLEC
																		TSHR	Thyroid Stimulating Hormone Receptor	Protein Coding	47	GC14P080954	5.21	https://www.genecards.org/cgi-bin/carddisp.pl?gene=TSHR															PLEK
																		TFAP2A	Transcription Factor AP-2 Alpha	Protein Coding	47	GC06M010393	5.21	https://www.genecards.org/cgi-bin/carddisp.pl?gene=TFAP2A															PLIN1
																		KL	Klotho	Protein Coding	44	GC13P033016	5.2	https://www.genecards.org/cgi-bin/carddisp.pl?gene=KL															PLN
																		IL3	Interleukin 3	Protein Coding	44	GC05P132060	5.2	https://www.genecards.org/cgi-bin/carddisp.pl?gene=IL3															PMM2
																		USH1C	USH1 Protein Network Component Harmonin	Protein Coding	41	GC11M017494	5.19	https://www.genecards.org/cgi-bin/carddisp.pl?gene=USH1C															PMPCA
																		MIR32	MicroRNA 32	RNA Gene	19	GC09M109046	5.19	https://www.genecards.org/cgi-bin/carddisp.pl?gene=MIR32															PNDM1
																		GIPC1	GIPC PDZ Domain Containing Family Member 1	Protein Coding	41	GC19M014450	5.18	https://www.genecards.org/cgi-bin/carddisp.pl?gene=GIPC1															PNDM2
																		MIR154	MicroRNA 154	RNA Gene	18	GC14P104778	5.18	https://www.genecards.org/cgi-bin/carddisp.pl?gene=MIR154															PNDM3
																		PEG10	Paternally Expressed 10	Protein Coding	40	GC07P094656	5.18	https://www.genecards.org/cgi-bin/carddisp.pl?gene=PEG10															PNDM4
																		PHIP	Pleckstrin Homology Domain Interacting Protein	Protein Coding	39	GC06M078934	5.18	https://www.genecards.org/cgi-bin/carddisp.pl?gene=PHIP															PNLIP
																		CBL	Cbl Proto-Oncogene	Protein Coding	50	GC11P119206	5.18	https://www.genecards.org/cgi-bin/carddisp.pl?gene=CBL															PNPLA2
																		HSPA9	Heat Shock Protein Family A (Hsp70) Member 9	Protein Coding	47	GC05M138554	5.17	https://www.genecards.org/cgi-bin/carddisp.pl?gene=HSPA9															POLDIP2
																		USP7	Ubiquitin Specific Peptidase 7	Protein Coding	47	GC16M008892	5.17	https://www.genecards.org/cgi-bin/carddisp.pl?gene=USP7															POLG
																		ALMS1P1	ALMS1 Pseudogene 1	Pseudogene	13	GC02P073644	5.17	https://www.genecards.org/cgi-bin/carddisp.pl?gene=ALMS1P1															POLG2
																		GPAT3	Glycerol-3-Phosphate Acyltransferase 3	Protein Coding	33	GC04P083536	5.17	https://www.genecards.org/cgi-bin/carddisp.pl?gene=GPAT3															POMC
																		STUB1	STIP1 Homology And U-Box Containing Protein 1	Protein Coding	45	GC16P001405	5.17	https://www.genecards.org/cgi-bin/carddisp.pl?gene=STUB1															POMGNT1
																		MYOCD	Myocardin	Protein Coding	41	GC17P012665	5.16	https://www.genecards.org/cgi-bin/carddisp.pl?gene=MYOCD															PON
																		PRNP	Prion Protein	Protein Coding	47	GC20P004686	5.15	https://www.genecards.org/cgi-bin/carddisp.pl?gene=PRNP															PON1
																		HBS1L	HBS1 Like Translational GTPase	Protein Coding	39	GC06M134960	5.15	https://www.genecards.org/cgi-bin/carddisp.pl?gene=HBS1L															PON2
																		VANGL1	VANGL Planar Cell Polarity Protein 1	Protein Coding	43	GC01P115641	5.15	https://www.genecards.org/cgi-bin/carddisp.pl?gene=VANGL1															POSTN
																		PSMB9	Proteasome 20S Subunit Beta 9	Protein Coding	46	GC06P047342	5.15	https://www.genecards.org/cgi-bin/carddisp.pl?gene=PSMB9															POTEF
																		FKBP1B	FKBP Prolyl Isomerase 1B	Protein Coding	40	GC02P024033	5.14	https://www.genecards.org/cgi-bin/carddisp.pl?gene=FKBP1B															PPARA
																		TIA1	TIA1 Cytotoxic Granule Associated RNA Binding Protein	Protein Coding	43	GC02M070209	5.14	https://www.genecards.org/cgi-bin/carddisp.pl?gene=TIA1															PPARD
																		MIR199B	MicroRNA 199b	RNA Gene	19	GC09M128244	5.13	https://www.genecards.org/cgi-bin/carddisp.pl?gene=MIR199B															PPARG
																		GGCT	Gamma-Glutamylcyclotransferase	Protein Coding	39	GC07M030496	5.13	https://www.genecards.org/cgi-bin/carddisp.pl?gene=GGCT															PPARG1
																		MYD88	MYD88 Innate Immune Signal Transduction Adaptor	Protein Coding	50	GC03P038179	5.13	https://www.genecards.org/cgi-bin/carddisp.pl?gene=MYD88															PPARG2
																		USP9X	Ubiquitin Specific Peptidase 9 X-Linked	Protein Coding	47	GC0XP041085	5.13	https://www.genecards.org/cgi-bin/carddisp.pl?gene=USP9X															PPARGC1A
																		RPS26	Ribosomal Protein S26	Protein Coding	42	GC12P056043	5.12	https://www.genecards.org/cgi-bin/carddisp.pl?gene=RPS26															PPARGC1B
																		TCF21	Transcription Factor 21	Protein Coding	36	GC06P133889	5.12	https://www.genecards.org/cgi-bin/carddisp.pl?gene=TCF21															PPCS
																		SPINK5	Serine Peptidase Inhibitor Kazal Type 5	Protein Coding	41	GC05P148025	5.12	https://www.genecards.org/cgi-bin/carddisp.pl?gene=SPINK5															PPIA
																		KIT	KIT Proto-Oncogene, Receptor Tyrosine Kinase	Protein Coding	53	GC04P054657	5.11	https://www.genecards.org/cgi-bin/carddisp.pl?gene=KIT															PPIF
																		KITLG	KIT Ligand	Protein Coding	44	GC12M088492	5.11	https://www.genecards.org/cgi-bin/carddisp.pl?gene=KITLG															PPKS2
																		TUSC3	Tumor Suppressor Candidate 3	Protein Coding	41	GC08P015417	5.11	https://www.genecards.org/cgi-bin/carddisp.pl?gene=TUSC3															PPOX
																		DUSP1	Dual Specificity Phosphatase 1	Protein Coding	47	GC05M172768	5.1	https://www.genecards.org/cgi-bin/carddisp.pl?gene=DUSP1															PPP1R3A
																		PHYH	Phytanoyl-CoA 2-Hydroxylase	Protein Coding	45	GC10M013277	5.1	https://www.genecards.org/cgi-bin/carddisp.pl?gene=PHYH															PRDM10
																		LYRM4	LYR Motif Containing 4	Protein Coding	38	GC06M005032	5.1	https://www.genecards.org/cgi-bin/carddisp.pl?gene=LYRM4															PRDM16
																		DCTN1	Dynactin Subunit 1	Protein Coding	46	GC02M074361	5.09	https://www.genecards.org/cgi-bin/carddisp.pl?gene=DCTN1															PRKAA1
																		HSPA1B	Heat Shock Protein Family A (Hsp70) Member 1B	Protein Coding	40	GC06P047325	5.09	https://www.genecards.org/cgi-bin/carddisp.pl?gene=HSPA1B															PRKAA2
																		NEO1	Neogenin 1	Protein Coding	40	GC15P073051	5.09	https://www.genecards.org/cgi-bin/carddisp.pl?gene=NEO1															PRKAB1
																		PTX3	Pentraxin 3	Protein Coding	41	GC03P157436	5.09	https://www.genecards.org/cgi-bin/carddisp.pl?gene=PTX3															PRKACA
																		MME	Membrane Metalloendopeptidase	Protein Coding	50	GC03P155024	5.08	https://www.genecards.org/cgi-bin/carddisp.pl?gene=MME															PRKACG
																		MAP2K4	Mitogen-Activated Protein Kinase Kinase 4	Protein Coding	46	GC17P012020	5.08	https://www.genecards.org/cgi-bin/carddisp.pl?gene=MAP2K4															PRKAG2
																		ANPEP	Alanyl Aminopeptidase, Membrane	Protein Coding	48	GC15M089784	5.07	https://www.genecards.org/cgi-bin/carddisp.pl?gene=ANPEP															PRKAR1A
																		MCL1	MCL1 Apoptosis Regulator, BCL2 Family Member	Protein Coding	47	GC01M150707	5.06	https://www.genecards.org/cgi-bin/carddisp.pl?gene=MCL1															PRKCA
																		FANCF	FA Complementation Group F	Protein Coding	42	GC11M022600	5.05	https://www.genecards.org/cgi-bin/carddisp.pl?gene=FANCF															PRKCB
																		SLX4	SLX4 Structure-Specific Endonuclease Subunit	Protein Coding	39	GC16M003581	5.05	https://www.genecards.org/cgi-bin/carddisp.pl?gene=SLX4															PRKCD
																		ERCC3	ERCC Excision Repair 3, TFIIH Core Complex Helicase Subunit	Protein Coding	47	GC02M127257	5.04	https://www.genecards.org/cgi-bin/carddisp.pl?gene=ERCC3															PRKCE
																		PEX16	Peroxisomal Biogenesis Factor 16	Protein Coding	38	GC11M061098	5.04	https://www.genecards.org/cgi-bin/carddisp.pl?gene=PEX16															PRKCH
																		APOD	Apolipoprotein D	Protein Coding	43	GC03M195568	5.03	https://www.genecards.org/cgi-bin/carddisp.pl?gene=APOD															PRKCZ
																		TUBB1	Tubulin Beta 1 Class VI	Protein Coding	47	GC20P059020	5.02	https://www.genecards.org/cgi-bin/carddisp.pl?gene=TUBB1															PRKD1
																		ADRA2C	Adrenoceptor Alpha 2C	Protein Coding	45	GC04P003766	5.02	https://www.genecards.org/cgi-bin/carddisp.pl?gene=ADRA2C															PRKG1
																		TOMM20	Translocase Of Outer Mitochondrial Membrane 20	Protein Coding	39	GC01M235109	5	https://www.genecards.org/cgi-bin/carddisp.pl?gene=TOMM20															PRKN
																		TBK1	TANK Binding Kinase 1	Protein Coding	49	GC12P064451	5	https://www.genecards.org/cgi-bin/carddisp.pl?gene=TBK1															PRKRI
																		NLRP7	NLR Family Pyrin Domain Containing 7	Protein Coding	43	GC19M054923	4.99	https://www.genecards.org/cgi-bin/carddisp.pl?gene=NLRP7															PRL
																		NLRP2	NLR Family Pyrin Domain Containing 2	Protein Coding	41	GC19P054953	4.99	https://www.genecards.org/cgi-bin/carddisp.pl?gene=NLRP2															PRNP
																		XRCC5	X-Ray Repair Cross Complementing 5	Protein Coding	44	GC02P216107	4.99	https://www.genecards.org/cgi-bin/carddisp.pl?gene=XRCC5															PROC
																		BANF1	BAF Nuclear Assembly Factor 1	Protein Coding	42	GC11P066002	4.99	https://www.genecards.org/cgi-bin/carddisp.pl?gene=BANF1															PRODH
																		ACSL1	Acyl-CoA Synthetase Long Chain Family Member 1	Protein Coding	44	GC04M184755	4.99	https://www.genecards.org/cgi-bin/carddisp.pl?gene=ACSL1															PROK2
																		FCGRT	Fc Fragment Of IgG Receptor And Transporter	Protein Coding	40	GC19P049506	4.98	https://www.genecards.org/cgi-bin/carddisp.pl?gene=FCGRT															PROKR2
																		RBX1	Ring-Box 1	Protein Coding	42	GC22P040951	4.98	https://www.genecards.org/cgi-bin/carddisp.pl?gene=RBX1															PROM1
																		XYLT1	Xylosyltransferase 1	Protein Coding	43	GC16M017101	4.98	https://www.genecards.org/cgi-bin/carddisp.pl?gene=XYLT1															PRPF31
																		CYP1A2	Cytochrome P450 Family 1 Subfamily A Member 2	Protein Coding	45	GC15P074748	4.98	https://www.genecards.org/cgi-bin/carddisp.pl?gene=CYP1A2															PRPF8
																		DBH	Dopamine Beta-Hydroxylase	Protein Coding	50	GC09P133636	4.98	https://www.genecards.org/cgi-bin/carddisp.pl?gene=DBH															PRPH2
																		FKBP1A	FKBP Prolyl Isomerase 1A	Protein Coding	46	GC20M001369	4.98	https://www.genecards.org/cgi-bin/carddisp.pl?gene=FKBP1A															PRPS1
																		ADCYAP1	Adenylate Cyclase Activating Polypeptide 1	Protein Coding	41	GC18P000895	4.97	https://www.genecards.org/cgi-bin/carddisp.pl?gene=ADCYAP1															PRTN3
																		RASGRF1	Ras Protein Specific Guanine Nucleotide Releasing Factor 1	Protein Coding	41	GC15M078959	4.97	https://www.genecards.org/cgi-bin/carddisp.pl?gene=RASGRF1															PSAP
																		KHDC3L	KH Domain Containing 3 Like, Subcortical Maternal Complex Member	Protein Coding	33	GC06P073362	4.97	https://www.genecards.org/cgi-bin/carddisp.pl?gene=KHDC3L															PSEN1
																		PARD6G-AS1	PARD6G Antisense RNA 1	RNA Gene	16	GC18P080147	4.97	https://www.genecards.org/cgi-bin/carddisp.pl?gene=PARD6G-AS1															PSEN2
																		H4C13	H4 Clustered Histone 13	Protein Coding	29	GC06M028372	4.97	https://www.genecards.org/cgi-bin/carddisp.pl?gene=H4C13															PSMA5
																		NUP107	Nucleoporin 107	Protein Coding	43	GC12P068686	4.97	https://www.genecards.org/cgi-bin/carddisp.pl?gene=NUP107															PSMB8
																		KCNAB2	Potassium Voltage-Gated Channel Subfamily A Regulatory Beta Subunit 2	Protein Coding	43	GC01P006020	4.97	https://www.genecards.org/cgi-bin/carddisp.pl?gene=KCNAB2															PSMB9
																		ERCC8	ERCC Excision Repair 8, CSA Ubiquitin Ligase Complex Subunit	Protein Coding	41	GC05M060868	4.96	https://www.genecards.org/cgi-bin/carddisp.pl?gene=ERCC8															PSMD4
																		FTHL17	Ferritin Heavy Chain Like 17	Protein Coding	32	GC0XM030999	4.96	https://www.genecards.org/cgi-bin/carddisp.pl?gene=FTHL17															PSMD5
																		KLF4	Kruppel Like Factor 4	Protein Coding	45	GC09M107484	4.96	https://www.genecards.org/cgi-bin/carddisp.pl?gene=KLF4															PSTI
																		TPI1	Triosephosphate Isomerase 1	Protein Coding	48	GC12P008208	4.96	https://www.genecards.org/cgi-bin/carddisp.pl?gene=TPI1															PTCH1
																		LGALSL	Galectin Like	Protein Coding	35	GC02P064453	4.95	https://www.genecards.org/cgi-bin/carddisp.pl?gene=LGALSL															PTEN
																		TMEM159	Transmembrane Protein 159	Protein Coding	34	GC16P021158	4.95	https://www.genecards.org/cgi-bin/carddisp.pl?gene=TMEM159															PTGDS
																		SETDB1	SET Domain Bifurcated Histone Lysine Methyltransferase 1	Protein Coding	41	GC01P150926	4.95	https://www.genecards.org/cgi-bin/carddisp.pl?gene=SETDB1															PTGS2
																		SECISBP2	SECIS Binding Protein 2	Protein Coding	42	GC09P089318	4.95	https://www.genecards.org/cgi-bin/carddisp.pl?gene=SECISBP2															PTH
																		LARGE1	LARGE Xylosyl- And Glucuronyltransferase 1	Protein Coding	32	GC22M033163	4.95	https://www.genecards.org/cgi-bin/carddisp.pl?gene=LARGE1															PTPA
																		ETS1	ETS Proto-Oncogene 1, Transcription Factor	Protein Coding	49	GC11M128458	4.95	https://www.genecards.org/cgi-bin/carddisp.pl?gene=ETS1															PTPN1
																		BMP7	Bone Morphogenetic Protein 7	Protein Coding	45	GC20M057168	4.94	https://www.genecards.org/cgi-bin/carddisp.pl?gene=BMP7															PTPN11
																		CACNB1	Calcium Voltage-Gated Channel Auxiliary Subunit Beta 1	Protein Coding	42	GC17M039173	4.94	https://www.genecards.org/cgi-bin/carddisp.pl?gene=CACNB1															PTPN22
																		SRF	Serum Response Factor	Protein Coding	41	GC06P043171	4.91	https://www.genecards.org/cgi-bin/carddisp.pl?gene=SRF															PTPN8
																		PMCH	Pro-Melanin Concentrating Hormone	Protein Coding	36	GC12M102196	4.91	https://www.genecards.org/cgi-bin/carddisp.pl?gene=PMCH															PTPRC
																		SEC14L5	SEC14 Like Lipid Binding 5	Protein Coding	31	GC16P004958	4.9	https://www.genecards.org/cgi-bin/carddisp.pl?gene=SEC14L5															PTRH2
																		RIPPLY3	Ripply Transcriptional Repressor 3	Protein Coding	30	GC21P037006	4.9	https://www.genecards.org/cgi-bin/carddisp.pl?gene=RIPPLY3															PTS
																		LRRK2	Leucine Rich Repeat Kinase 2	Protein Coding	49	GC12P040196	4.9	https://www.genecards.org/cgi-bin/carddisp.pl?gene=LRRK2															PTX3
																		HSPG2	Heparan Sulfate Proteoglycan 2	Protein Coding	45	GC01M021822	4.9	https://www.genecards.org/cgi-bin/carddisp.pl?gene=HSPG2															PUS1
																		RTEL1	Regulator Of Telomere Elongation Helicase 1	Protein Coding	40	GC20P063658	4.9	https://www.genecards.org/cgi-bin/carddisp.pl?gene=RTEL1															PUS10
																		ATCAY	ATCAY Kinesin Light Chain Interacting Caytaxin	Protein Coding	38	GC19P003880	4.9	https://www.genecards.org/cgi-bin/carddisp.pl?gene=ATCAY															PUS3
																		TRIM63	Tripartite Motif Containing 63	Protein Coding	40	GC01M026062	4.89	https://www.genecards.org/cgi-bin/carddisp.pl?gene=TRIM63															PVT1
																		SLC10A2	Solute Carrier Family 10 Member 2	Protein Coding	43	GC13M103043	4.88	https://www.genecards.org/cgi-bin/carddisp.pl?gene=SLC10A2															Pxmp2
																		IFNAR1	Interferon Alpha And Beta Receptor Subunit 1	Protein Coding	45	GC21P033324	4.87	https://www.genecards.org/cgi-bin/carddisp.pl?gene=IFNAR1															PYCARD
																		NSUN3	NOP2/Sun RNA Methyltransferase 3	Protein Coding	36	GC03P094062	4.87	https://www.genecards.org/cgi-bin/carddisp.pl?gene=NSUN3															PYGL
																		NSUN7	NOP2/Sun RNA Methyltransferase Family Member 7	Protein Coding	34	GC04P040751	4.87	https://www.genecards.org/cgi-bin/carddisp.pl?gene=NSUN7															PYGM
																		PHB2	Prohibitin 2	Protein Coding	40	GC12M006965	4.87	https://www.genecards.org/cgi-bin/carddisp.pl?gene=PHB2															PYY
																		RNASE3	Ribonuclease A Family Member 3	Protein Coding	40	GC14P020891	4.86	https://www.genecards.org/cgi-bin/carddisp.pl?gene=RNASE3															RABGEF1
																		EPPIN	Epididymal Peptidase Inhibitor	Protein Coding	35	GC20M045541	4.86	https://www.genecards.org/cgi-bin/carddisp.pl?gene=EPPIN															RAC1
																		NR0B1	Nuclear Receptor Subfamily 0 Group B Member 1	Protein Coding	46	GC0XM030304	4.85	https://www.genecards.org/cgi-bin/carddisp.pl?gene=NR0B1															RAD51
																		PET100	PET100 Cytochrome C Oxidase Chaperone	Protein Coding	31	GC19P007630	4.85	https://www.genecards.org/cgi-bin/carddisp.pl?gene=PET100															RAD51C
																		LMBR1	Limb Development Membrane Protein 1	Protein Coding	39	GC07M156668	4.85	https://www.genecards.org/cgi-bin/carddisp.pl?gene=LMBR1															RAD9B
																		CDK6	Cyclin Dependent Kinase 6	Protein Coding	54	GC07M092604	4.84	https://www.genecards.org/cgi-bin/carddisp.pl?gene=CDK6															RAF1
																		ZBTB18	Zinc Finger And BTB Domain Containing 18	Protein Coding	39	GC01P244048	4.84	https://www.genecards.org/cgi-bin/carddisp.pl?gene=ZBTB18															RAP1A
																		DEFB103B	Defensin Beta 103B	Protein Coding	30	GC08M007430	4.83	https://www.genecards.org/cgi-bin/carddisp.pl?gene=DEFB103B															RARRES2
																		SLC6A2	Solute Carrier Family 6 Member 2	Protein Coding	48	GC16P055656	4.83	https://www.genecards.org/cgi-bin/carddisp.pl?gene=SLC6A2															RB1
																		SEPSECS	Sep (O-Phosphoserine) TRNA:Sec (Selenocysteine) TRNA Synthase	Protein Coding	43	GC04M025121	4.83	https://www.genecards.org/cgi-bin/carddisp.pl?gene=SEPSECS															Rbbp9
																		LY86	Lymphocyte Antigen 86	Protein Coding	37	GC06P006588	4.83	https://www.genecards.org/cgi-bin/carddisp.pl?gene=LY86															RBCK1
																		CACNG8	Calcium Voltage-Gated Channel Auxiliary Subunit Gamma 8	Protein Coding	37	GC19P054637	4.83	https://www.genecards.org/cgi-bin/carddisp.pl?gene=CACNG8															RBFOX2
																		EPOR	Erythropoietin Receptor	Protein Coding	48	GC19M011377	4.83	https://www.genecards.org/cgi-bin/carddisp.pl?gene=EPOR															RBM20
																		RAB7A	RAB7A, Member RAS Oncogene Family	Protein Coding	48	GC03P128749	4.82	https://www.genecards.org/cgi-bin/carddisp.pl?gene=RAB7A															RBP4
																		SRRT	Serrate, RNA Effector Molecule	Protein Coding	37	GC07P100875	4.81	https://www.genecards.org/cgi-bin/carddisp.pl?gene=SRRT															RCE1
																		GYS2	Glycogen Synthase 2	Protein Coding	44	GC12M021531	4.81	https://www.genecards.org/cgi-bin/carddisp.pl?gene=GYS2															RCM1
																		SPAG17	Sperm Associated Antigen 17	Protein Coding	34	GC01M117953	4.81	https://www.genecards.org/cgi-bin/carddisp.pl?gene=SPAG17															RCM2
																		HSPB7	Heat Shock Protein Family B (Small) Member 7	Protein Coding	39	GC01M016014	4.8	https://www.genecards.org/cgi-bin/carddisp.pl?gene=HSPB7															RCM3
																		MT-TC	Mitochondrially Encoded TRNA-Cys (UGU/C)	RNA Gene	10	GCMTM005763	4.8	https://www.genecards.org/cgi-bin/carddisp.pl?gene=MT-TC															RCM4
																		PON3	Paraoxonase 3	Protein Coding	44	GC07M095359	4.8	https://www.genecards.org/cgi-bin/carddisp.pl?gene=PON3															RCM5
																		GTPBP1	GTP Binding Protein 1	Protein Coding	38	GC22P038705	4.8	https://www.genecards.org/cgi-bin/carddisp.pl?gene=GTPBP1															RDH12
																		PIEZO1	Piezo Type Mechanosensitive Ion Channel Component 1	Protein Coding	37	GC16M088715	4.8	https://www.genecards.org/cgi-bin/carddisp.pl?gene=PIEZO1															RECK
																		SULT1A3	Sulfotransferase Family 1A Member 3	Protein Coding	38	GC16P030199	4.78	https://www.genecards.org/cgi-bin/carddisp.pl?gene=SULT1A3															RELA
																		HBG2	Hemoglobin Subunit Gamma 2	Protein Coding	42	GC11M005372	4.78	https://www.genecards.org/cgi-bin/carddisp.pl?gene=HBG2															REN
																		FEN1	Flap Structure-Specific Endonuclease 1	Protein Coding	46	GC11P061811	4.78	https://www.genecards.org/cgi-bin/carddisp.pl?gene=FEN1															RENBP
																		H3-3B	H3.3 Histone B	Protein Coding	33	GC17M075780	4.77	https://www.genecards.org/cgi-bin/carddisp.pl?gene=H3-3B															RERE
																		UTRN	Utrophin	Protein Coding	40	GC06P144285	4.77	https://www.genecards.org/cgi-bin/carddisp.pl?gene=UTRN															RET
																		NAT9	N-Acetyltransferase 9 (Putative)	Protein Coding	37	GC17M074770	4.77	https://www.genecards.org/cgi-bin/carddisp.pl?gene=NAT9															RETN
																		IL7	Interleukin 7	Protein Coding	42	GC08M078689	4.77	https://www.genecards.org/cgi-bin/carddisp.pl?gene=IL7															RFC2
																		TEX14	Testis Expressed 14, Intercellular Bridge Forming Factor	Protein Coding	39	GC17M058556	4.77	https://www.genecards.org/cgi-bin/carddisp.pl?gene=TEX14															RHAG
																		SMARCA4	SWI/SNF Related, Matrix Associated, Actin Dependent Regulator Of Chromatin, Subfamily A, Member 4	Protein Coding	50	GC19P010932	4.77	https://www.genecards.org/cgi-bin/carddisp.pl?gene=SMARCA4															RHD
																		ITGB5	Integrin Subunit Beta 5	Protein Coding	45	GC03M124761	4.76	https://www.genecards.org/cgi-bin/carddisp.pl?gene=ITGB5															RHO
																		FDFT1	Farnesyl-Diphosphate Farnesyltransferase 1	Protein Coding	44	GC08P011795	4.76	https://www.genecards.org/cgi-bin/carddisp.pl?gene=FDFT1															RHOA
																		SDHC	Succinate Dehydrogenase Complex Subunit C	Protein Coding	44	GC01P161314	4.75	https://www.genecards.org/cgi-bin/carddisp.pl?gene=SDHC															RHOD
																		CYP2C19	Cytochrome P450 Family 2 Subfamily C Member 19	Protein Coding	46	GC10P094762	4.75	https://www.genecards.org/cgi-bin/carddisp.pl?gene=CYP2C19															RHOU
																		HDAC3	Histone Deacetylase 3	Protein Coding	49	GC05M141583	4.75	https://www.genecards.org/cgi-bin/carddisp.pl?gene=HDAC3															RIPE3B1
																		CACNA2D3	Calcium Voltage-Gated Channel Auxiliary Subunit Alpha2delta 3	Protein Coding	40	GC03P054156	4.75	https://www.genecards.org/cgi-bin/carddisp.pl?gene=CACNA2D3															RLBP1
																		LIG3	DNA Ligase 3	Protein Coding	44	GC17P034980	4.75	https://www.genecards.org/cgi-bin/carddisp.pl?gene=LIG3															RLN2
																		DCN	Decorin	Protein Coding	47	GC12M091140	4.74	https://www.genecards.org/cgi-bin/carddisp.pl?gene=DCN															RLN3
																		LARS2	Leucyl-TRNA Synthetase 2, Mitochondrial	Protein Coding	45	GC03P045405	4.73	https://www.genecards.org/cgi-bin/carddisp.pl?gene=LARS2															RMD2
																		CETN3	Centrin 3	Protein Coding	39	GC05M090392	4.72	https://www.genecards.org/cgi-bin/carddisp.pl?gene=CETN3															RMI2
																		CD2	CD2 Molecule	Protein Coding	44	GC01P116754	4.72	https://www.genecards.org/cgi-bin/carddisp.pl?gene=CD2															RNASEH2A
																		MAN2B1	Mannosidase Alpha Class 2B Member 1	Protein Coding	43	GC19M012663	4.72	https://www.genecards.org/cgi-bin/carddisp.pl?gene=MAN2B1															RNASEH2B
																		PRICKLE2	Prickle Planar Cell Polarity Protein 2	Protein Coding	39	GC03M064079	4.72	https://www.genecards.org/cgi-bin/carddisp.pl?gene=PRICKLE2															RNASEH2C
																		EEF1A2	Eukaryotic Translation Elongation Factor 1 Alpha 2	Protein Coding	45	GC20M063488	4.71	https://www.genecards.org/cgi-bin/carddisp.pl?gene=EEF1A2															RND1
																		TRIM28	Tripartite Motif Containing 28	Protein Coding	43	GC19P058544	4.71	https://www.genecards.org/cgi-bin/carddisp.pl?gene=TRIM28															RND2
																		ABHD12	Abhydrolase Domain Containing 12, Lysophospholipase	Protein Coding	40	GC20M025294	4.71	https://www.genecards.org/cgi-bin/carddisp.pl?gene=ABHD12															RNF19A
																		HMCN1	Hemicentin 1	Protein Coding	38	GC01P185734	4.7	https://www.genecards.org/cgi-bin/carddisp.pl?gene=HMCN1															RNU4ATAC
																		FBXO32	F-Box Protein 32	Protein Coding	40	GC08M123498	4.69	https://www.genecards.org/cgi-bin/carddisp.pl?gene=FBXO32															ROM1
																		GRHPR	Glyoxylate And Hydroxypyruvate Reductase	Protein Coding	46	GC09P037412	4.69	https://www.genecards.org/cgi-bin/carddisp.pl?gene=GRHPR															ROS1
																		ARSG	Arylsulfatase G	Protein Coding	43	GC17P068259	4.69	https://www.genecards.org/cgi-bin/carddisp.pl?gene=ARSG															RPE65
																		SLC26A1	Solute Carrier Family 26 Member 1	Protein Coding	40	GC04M000979	4.69	https://www.genecards.org/cgi-bin/carddisp.pl?gene=SLC26A1															RPGR
																		TMCO1	Transmembrane And Coiled-Coil Domains 1	Protein Coding	40	GC01M165724	4.69	https://www.genecards.org/cgi-bin/carddisp.pl?gene=TMCO1															RPGRIP1L
																		CHM	CHM Rab Escort Protein	Protein Coding	39	GC0XM085861	4.69	https://www.genecards.org/cgi-bin/carddisp.pl?gene=CHM															RPH3A
																		KRT83	Keratin 83	Protein Coding	38	GC12M052314	4.69	https://www.genecards.org/cgi-bin/carddisp.pl?gene=KRT83															RPS26
																		HBB-LCR	Beta-Globin Locus Control Region	Biological Region	4	GC11P005270	4.69	https://www.genecards.org/cgi-bin/carddisp.pl?gene=HBB-LCR															RPS27A
																		APEX1	Apurinic/Apyrimidinic Endodeoxyribonuclease 1	Protein Coding	45	GC14P020455	4.69	https://www.genecards.org/cgi-bin/carddisp.pl?gene=APEX1															RPS3A
																		CBSL	Cystathionine Beta-Synthase Like	Protein Coding	17	GC21M006445	4.69	https://www.genecards.org/cgi-bin/carddisp.pl?gene=CBSL															RPS6KA1
																		AHSP	Alpha Hemoglobin Stabilizing Protein	Protein Coding	35	GC16P031527	4.68	https://www.genecards.org/cgi-bin/carddisp.pl?gene=AHSP															RPS6KB1
																		MIR323A	MicroRNA 323a	RNA Gene	16	GC14P104782	4.68	https://www.genecards.org/cgi-bin/carddisp.pl?gene=MIR323A															RRAD
																		TGFA	Transforming Growth Factor Alpha	Protein Coding	46	GC02M070447	4.68	https://www.genecards.org/cgi-bin/carddisp.pl?gene=TGFA															RRM2B
																		HPRT1	Hypoxanthine Phosphoribosyltransferase 1	Protein Coding	48	GC0XP134460	4.68	https://www.genecards.org/cgi-bin/carddisp.pl?gene=HPRT1															RSTN
																		PCNT	Pericentrin	Protein Coding	41	GC21P046324	4.68	https://www.genecards.org/cgi-bin/carddisp.pl?gene=PCNT															RTL1
																		GARS1	Glycyl-TRNA Synthetase 1	Protein Coding	36	GC07P030595	4.67	https://www.genecards.org/cgi-bin/carddisp.pl?gene=GARS1															RTN4
																		UNC13A	Unc-13 Homolog A	Protein Coding	40	GC19M017602	4.67	https://www.genecards.org/cgi-bin/carddisp.pl?gene=UNC13A															RUNX2
																		MIR16-1	MicroRNA 16-1	RNA Gene	21	GC13M050048	4.67	https://www.genecards.org/cgi-bin/carddisp.pl?gene=MIR16-1															RYR1
																		OGA	O-GlcNAcase	Protein Coding	32	GC10M101785	4.66	https://www.genecards.org/cgi-bin/carddisp.pl?gene=OGA															RYR2
																		CCL4	C-C Motif Chemokine Ligand 4	Protein Coding	40	GC17P036103	4.66	https://www.genecards.org/cgi-bin/carddisp.pl?gene=CCL4															S100A12
																		RAB7B	RAB7B, Member RAS Oncogene Family	Protein Coding	32	GC01M205976	4.65	https://www.genecards.org/cgi-bin/carddisp.pl?gene=RAB7B															S100a8
																		GAMT	Guanidinoacetate N-Methyltransferase	Protein Coding	46	GC19M001397	4.65	https://www.genecards.org/cgi-bin/carddisp.pl?gene=GAMT															S100B
																		MIR590	MicroRNA 590	RNA Gene	18	GC07P074191	4.65	https://www.genecards.org/cgi-bin/carddisp.pl?gene=MIR590															SACS
																		PSMD9	Proteasome 26S Subunit, Non-ATPase 9	Protein Coding	43	GC12P122847	4.64	https://www.genecards.org/cgi-bin/carddisp.pl?gene=PSMD9															SAG
																		NPAS3	Neuronal PAS Domain Protein 3	Protein Coding	39	GC14P032934	4.64	https://www.genecards.org/cgi-bin/carddisp.pl?gene=NPAS3															SALMY
																		GPD1	Glycerol-3-Phosphate Dehydrogenase 1	Protein Coding	45	GC12P050105	4.63	https://www.genecards.org/cgi-bin/carddisp.pl?gene=GPD1															SAMHD1
																		PKP3	Plakophilin 3	Protein Coding	37	GC11P000394	4.62	https://www.genecards.org/cgi-bin/carddisp.pl?gene=PKP3															SARDH
																		LY96	Lymphocyte Antigen 96	Protein Coding	42	GC08P073991	4.62	https://www.genecards.org/cgi-bin/carddisp.pl?gene=LY96															SCARB1
																		DMGDH	Dimethylglycine Dehydrogenase	Protein Coding	42	GC05M078997	4.62	https://www.genecards.org/cgi-bin/carddisp.pl?gene=DMGDH															SCD
																		DIO3	Iodothyronine Deiodinase 3	Protein Coding	40	GC14P104662	4.61	https://www.genecards.org/cgi-bin/carddisp.pl?gene=DIO3															SCG5
																		CAMTA1	Calmodulin Binding Transcription Activator 1	Protein Coding	40	GC01P006845	4.61	https://www.genecards.org/cgi-bin/carddisp.pl?gene=CAMTA1															SCN1A
																		RBFOX2	RNA Binding Fox-1 Homolog 2	Protein Coding	38	GC22M035738	4.6	https://www.genecards.org/cgi-bin/carddisp.pl?gene=RBFOX2															SCN1B
																		FAM189A2	Family With Sequence Similarity 189 Member A2	Protein Coding	34	GC09P069324	4.6	https://www.genecards.org/cgi-bin/carddisp.pl?gene=FAM189A2															SCN3A
																		CACNA2D2	Calcium Voltage-Gated Channel Auxiliary Subunit Alpha2delta 2	Protein Coding	41	GC03M050385	4.6	https://www.genecards.org/cgi-bin/carddisp.pl?gene=CACNA2D2															SCN5A
																		GPAA1	Glycosylphosphatidylinositol Anchor Attachment 1	Protein Coding	42	GC08P144082	4.59	https://www.genecards.org/cgi-bin/carddisp.pl?gene=GPAA1															SCO1
																		RUNX1	RUNX Family Transcription Factor 1	Protein Coding	48	GC21M034787	4.58	https://www.genecards.org/cgi-bin/carddisp.pl?gene=RUNX1															SCO2
																		GANAB	Glucosidase II Alpha Subunit	Protein Coding	44	GC11M063430	4.58	https://www.genecards.org/cgi-bin/carddisp.pl?gene=GANAB															SCPNK
																		ABCD1	ATP Binding Cassette Subfamily D Member 1	Protein Coding	45	GC0XP153724	4.58	https://www.genecards.org/cgi-bin/carddisp.pl?gene=ABCD1															SDC3
																		PRF1	Perforin 1	Protein Coding	45	GC10M070597	4.58	https://www.genecards.org/cgi-bin/carddisp.pl?gene=PRF1															SDCCAG8
																		BTNL2	Butyrophilin Like 2	Protein Coding	39	GC06M032393	4.57	https://www.genecards.org/cgi-bin/carddisp.pl?gene=BTNL2															SDH1
																		NEFH	Neurofilament Heavy	Protein Coding	45	GC22P029480	4.57	https://www.genecards.org/cgi-bin/carddisp.pl?gene=NEFH															SDHA
																		LOC110806262	Solute Carrier Family 6 Member 4 Gene Promoter	Biological Region	1	GC17P030235	4.57	https://www.genecards.org/cgi-bin/carddisp.pl?gene=LOC110806262															SDHAF1
																		ISCU	Iron-Sulfur Cluster Assembly Enzyme	Protein Coding	44	GC12P108561	4.57	https://www.genecards.org/cgi-bin/carddisp.pl?gene=ISCU															SDHB
																		PROP1	PROP Paired-Like Homeobox 1	Protein Coding	40	GC05M177992	4.57	https://www.genecards.org/cgi-bin/carddisp.pl?gene=PROP1															SDHD
																		PDCD1LG2	Programmed Cell Death 1 Ligand 2	Protein Coding	41	GC09P005510	4.56	https://www.genecards.org/cgi-bin/carddisp.pl?gene=PDCD1LG2															SDHF
																		H3-3A	H3.3 Histone A	Protein Coding	34	GC01P226062	4.56	https://www.genecards.org/cgi-bin/carddisp.pl?gene=H3-3A															SEC23B
																		SLC30A2	Solute Carrier Family 30 Member 2	Protein Coding	43	GC01M026048	4.56	https://www.genecards.org/cgi-bin/carddisp.pl?gene=SLC30A2															SELE
																		NGLY1	N-Glycanase 1	Protein Coding	44	GC03M025718	4.55	https://www.genecards.org/cgi-bin/carddisp.pl?gene=NGLY1															SELENON
																		GMPR	Guanosine Monophosphate Reductase	Protein Coding	43	GC06P016238	4.55	https://www.genecards.org/cgi-bin/carddisp.pl?gene=GMPR															SELL
																		NPRL3	NPR3 Like, GATOR1 Complex Subunit	Protein Coding	38	GC16M000084	4.55	https://www.genecards.org/cgi-bin/carddisp.pl?gene=NPRL3															SELP
																		CXDUPQ26.3	Chromosome Xq26.3 Duplication Syndrome	Genetic Locus	2	GC0XU902043	4.55	https://www.genecards.org/cgi-bin/carddisp.pl?gene=CXDUPQ26.3															SEMA4A
																		CUBN	Cubilin	Protein Coding	46	GC10M016824	4.55	https://www.genecards.org/cgi-bin/carddisp.pl?gene=CUBN															SERAC1
																		MAT1A	Methionine Adenosyltransferase 1A	Protein Coding	47	GC10M080271	4.55	https://www.genecards.org/cgi-bin/carddisp.pl?gene=MAT1A															SERPINA1
																		CYC1	Cytochrome C1	Protein Coding	45	GC08P144095	4.55	https://www.genecards.org/cgi-bin/carddisp.pl?gene=CYC1															SERPINA3
																		NR5A1	Nuclear Receptor Subfamily 5 Group A Member 1	Protein Coding	50	GC09M124481	4.54	https://www.genecards.org/cgi-bin/carddisp.pl?gene=NR5A1															SERPINA6
																		SPARC	Secreted Protein Acidic And Cysteine Rich	Protein Coding	50	GC05M151639	4.54	https://www.genecards.org/cgi-bin/carddisp.pl?gene=SPARC															SERPINA7
																		PDE5A	Phosphodiesterase 5A	Protein Coding	44	GC04M119494	4.54	https://www.genecards.org/cgi-bin/carddisp.pl?gene=PDE5A															SERPINC1
																		XRCC6	X-Ray Repair Cross Complementing 6	Protein Coding	45	GC22P041622	4.54	https://www.genecards.org/cgi-bin/carddisp.pl?gene=XRCC6															SERPINE1
																		LGALS4	Galectin 4	Protein Coding	38	GC19M042441	4.54	https://www.genecards.org/cgi-bin/carddisp.pl?gene=LGALS4															SERPINF2
																		HPD	4-Hydroxyphenylpyruvate Dioxygenase	Protein Coding	45	GC12M121839	4.54	https://www.genecards.org/cgi-bin/carddisp.pl?gene=HPD															SETX
																		PRKDC	Protein Kinase, DNA-Activated, Catalytic Subunit	Protein Coding	49	GC08M047773	4.54	https://www.genecards.org/cgi-bin/carddisp.pl?gene=PRKDC															SGCB
																		SUCLG1	Succinate-CoA Ligase GDP/ADP-Forming Subunit Alpha	Protein Coding	45	GC02M084423	4.54	https://www.genecards.org/cgi-bin/carddisp.pl?gene=SUCLG1															SGCD
																		TJP2	Tight Junction Protein 2	Protein Coding	45	GC09P069121	4.53	https://www.genecards.org/cgi-bin/carddisp.pl?gene=TJP2															SGCG
																		GJB1	Gap Junction Protein Beta 1	Protein Coding	47	GC0XP071215	4.53	https://www.genecards.org/cgi-bin/carddisp.pl?gene=GJB1															SGD
																		DSC3	Desmocollin 3	Protein Coding	42	GC18M030990	4.53	https://www.genecards.org/cgi-bin/carddisp.pl?gene=DSC3															SGK1
																		IMMT	Inner Membrane Mitochondrial Protein	Protein Coding	39	GC02M086144	4.53	https://www.genecards.org/cgi-bin/carddisp.pl?gene=IMMT															SGSH
																		TNFAIP3	TNF Alpha Induced Protein 3	Protein Coding	48	GC06P137866	4.53	https://www.genecards.org/cgi-bin/carddisp.pl?gene=TNFAIP3															SHBG
																		P2RX1	Purinergic Receptor P2X 1	Protein Coding	43	GC17M003896	4.51	https://www.genecards.org/cgi-bin/carddisp.pl?gene=P2RX1															SHC1
																		SH2D3A	SH2 Domain Containing 3A	Protein Coding	35	GC19M006752	4.5	https://www.genecards.org/cgi-bin/carddisp.pl?gene=SH2D3A															SHH
																		ZP3	Zona Pellucida Glycoprotein 3	Protein Coding	41	GC07P076398	4.5	https://www.genecards.org/cgi-bin/carddisp.pl?gene=ZP3															SI
																		SPAM1	Sperm Adhesion Molecule 1	Protein Coding	39	GC07P123925	4.5	https://www.genecards.org/cgi-bin/carddisp.pl?gene=SPAM1															SIM1
																		SSTR2	Somatostatin Receptor 2	Protein Coding	47	GC17P073165	4.49	https://www.genecards.org/cgi-bin/carddisp.pl?gene=SSTR2															SIRT1
																		MICOS13	Mitochondrial Contact Site And Cristae Organizing System Subunit 13	Protein Coding	27	GC19M005688	4.49	https://www.genecards.org/cgi-bin/carddisp.pl?gene=MICOS13															SIRT2
																		MTPN	Myotrophin	Protein Coding	36	GC07M135926	4.48	https://www.genecards.org/cgi-bin/carddisp.pl?gene=MTPN															SIRT3
																		RNASEL	Ribonuclease L	Protein Coding	44	GC01M182542	4.47	https://www.genecards.org/cgi-bin/carddisp.pl?gene=RNASEL															SIRT4
																		HDAC1	Histone Deacetylase 1	Protein Coding	49	GC01P032292	4.46	https://www.genecards.org/cgi-bin/carddisp.pl?gene=HDAC1															SIRT5
																		SPG7	SPG7 Matrix AAA Peptidase Subunit, Paraplegin	Protein Coding	43	GC16P089492	4.45	https://www.genecards.org/cgi-bin/carddisp.pl?gene=SPG7															SIRT6
																		INVS	Inversin	Protein Coding	44	GC09P100099	4.45	https://www.genecards.org/cgi-bin/carddisp.pl?gene=INVS															SIRT7
																		SPG11	SPG11 Vesicle Trafficking Associated, Spatacsin	Protein Coding	39	GC15M044562	4.45	https://www.genecards.org/cgi-bin/carddisp.pl?gene=SPG11															SIX3
																		ABCC1	ATP Binding Cassette Subfamily C Member 1	Protein Coding	47	GC16P015949	4.44	https://www.genecards.org/cgi-bin/carddisp.pl?gene=ABCC1															SLC11A2
																		AHCY	Adenosylhomocysteinase	Protein Coding	50	GC20M034276	4.44	https://www.genecards.org/cgi-bin/carddisp.pl?gene=AHCY															SLC12A3
																		RAN	RAN, Member RAS Oncogene Family	Protein Coding	45	GC12P130871	4.44	https://www.genecards.org/cgi-bin/carddisp.pl?gene=RAN															SLC17A5
																		CFLAR	CASP8 And FADD Like Apoptosis Regulator	Protein Coding	46	GC02P201117	4.43	https://www.genecards.org/cgi-bin/carddisp.pl?gene=CFLAR															SLC19A1
																		RARS2	Arginyl-TRNA Synthetase 2, Mitochondrial	Protein Coding	42	GC06M087514	4.43	https://www.genecards.org/cgi-bin/carddisp.pl?gene=RARS2															SLC19A2
																		SLC39A4	Solute Carrier Family 39 Member 4	Protein Coding	43	GC08M144409	4.42	https://www.genecards.org/cgi-bin/carddisp.pl?gene=SLC39A4															SLC19A3
																		ELP3	Elongator Acetyltransferase Complex Subunit 3	Protein Coding	39	GC08P028089	4.42	https://www.genecards.org/cgi-bin/carddisp.pl?gene=ELP3															SLC22A4
																		CD55	CD55 Molecule (Cromer Blood Group)	Protein Coding	47	GC01P207321	4.42	https://www.genecards.org/cgi-bin/carddisp.pl?gene=CD55															SLC22A5
																		MIR26A1	MicroRNA 26a-1	RNA Gene	20	GC03P037969	4.42	https://www.genecards.org/cgi-bin/carddisp.pl?gene=MIR26A1															SLC25A20
																		AKR1A1	Aldo-Keto Reductase Family 1 Member A1	Protein Coding	44	GC01P045550	4.42	https://www.genecards.org/cgi-bin/carddisp.pl?gene=AKR1A1															SLC25A24
																		BTD	Biotinidase	Protein Coding	44	GC03P015621	4.42	https://www.genecards.org/cgi-bin/carddisp.pl?gene=BTD															SLC25A28
																		CHI3L1	Chitinase 3 Like 1	Protein Coding	43	GC01M203148	4.42	https://www.genecards.org/cgi-bin/carddisp.pl?gene=CHI3L1															SLC25A3
																		MYH14	Myosin Heavy Chain 14	Protein Coding	45	GC19P050192	4.42	https://www.genecards.org/cgi-bin/carddisp.pl?gene=MYH14															SLC25A37
																		TPM4	Tropomyosin 4	Protein Coding	40	GC19P023264	4.42	https://www.genecards.org/cgi-bin/carddisp.pl?gene=TPM4															SLC25A4
																		TRIM25	Tripartite Motif Containing 25	Protein Coding	44	GC17M056836	4.4	https://www.genecards.org/cgi-bin/carddisp.pl?gene=TRIM25															SLC26A4
																		ACO2	Aconitase 2	Protein Coding	46	GC22P041469	4.39	https://www.genecards.org/cgi-bin/carddisp.pl?gene=ACO2															SLC27A1
																		TCIRG1	T Cell Immune Regulator 1, ATPase H+ Transporting V0 Subunit A3	Protein Coding	45	GC11P068038	4.38	https://www.genecards.org/cgi-bin/carddisp.pl?gene=TCIRG1															SLC2A1
																		PPL	Periplakin	Protein Coding	40	GC16M004872	4.36	https://www.genecards.org/cgi-bin/carddisp.pl?gene=PPL															SLC2A2
																		GHRHR	Growth Hormone Releasing Hormone Receptor	Protein Coding	43	GC07P030978	4.36	https://www.genecards.org/cgi-bin/carddisp.pl?gene=GHRHR															SLC2A4
																		SYNE4	Spectrin Repeat Containing Nuclear Envelope Family Member 4	Protein Coding	32	GC19M036003	4.35	https://www.genecards.org/cgi-bin/carddisp.pl?gene=SYNE4															SLC30A10
																		MECP2	Methyl-CpG Binding Protein 2	Protein Coding	45	GC0XM154021	4.35	https://www.genecards.org/cgi-bin/carddisp.pl?gene=MECP2															SLC30A8
																		FUCA1	Alpha-L-Fucosidase 1	Protein Coding	47	GC01M023845	4.34	https://www.genecards.org/cgi-bin/carddisp.pl?gene=FUCA1															SLC33A1
																		HTR3A	5-Hydroxytryptamine Receptor 3A	Protein Coding	45	GC11P113974	4.34	https://www.genecards.org/cgi-bin/carddisp.pl?gene=HTR3A															SLC39A14
																		MID1	Midline 1	Protein Coding	43	GC0XM010445	4.33	https://www.genecards.org/cgi-bin/carddisp.pl?gene=MID1															SLC39A8
																		COG7	Component Of Oligomeric Golgi Complex 7	Protein Coding	39	GC16M023307	4.33	https://www.genecards.org/cgi-bin/carddisp.pl?gene=COG7															SLC40A1
																		AVPR1A	Arginine Vasopressin Receptor 1A	Protein Coding	45	GC12M063142	4.33	https://www.genecards.org/cgi-bin/carddisp.pl?gene=AVPR1A															SLC46A1
																		CHUK	Component Of Inhibitor Of Nuclear Factor Kappa B Kinase Complex	Protein Coding	52	GC10M100188	4.33	https://www.genecards.org/cgi-bin/carddisp.pl?gene=CHUK															SLC4A1
																		VEGFC	Vascular Endothelial Growth Factor C	Protein Coding	47	GC04M176683	4.32	https://www.genecards.org/cgi-bin/carddisp.pl?gene=VEGFC															SLC4A5
																		ASL	Argininosuccinate Lyase	Protein Coding	45	GC07P066075	4.32	https://www.genecards.org/cgi-bin/carddisp.pl?gene=ASL															SLC52A3
																		PRKD2	Protein Kinase D2	Protein Coding	45	GC19M046674	4.32	https://www.genecards.org/cgi-bin/carddisp.pl?gene=PRKD2															SLC5A1
																		EIF2B4	Eukaryotic Translation Initiation Factor 2B Subunit Delta	Protein Coding	44	GC02M027364	4.31	https://www.genecards.org/cgi-bin/carddisp.pl?gene=EIF2B4															SLC5A2
																		MELTF	Melanotransferrin	Protein Coding	33	GC03M196987	4.31	https://www.genecards.org/cgi-bin/carddisp.pl?gene=MELTF															SLC6A3
																		KIF23	Kinesin Family Member 23	Protein Coding	43	GC15P069414	4.31	https://www.genecards.org/cgi-bin/carddisp.pl?gene=KIF23															SLC6A4
																		HSPB1	Heat Shock Protein Family B (Small) Member 1	Protein Coding	51	GC07P076302	4.3	https://www.genecards.org/cgi-bin/carddisp.pl?gene=HSPB1															SLC6A6
																		MIR320A	MicroRNA 320a	RNA Gene	20	GC08M022246	4.3	https://www.genecards.org/cgi-bin/carddisp.pl?gene=MIR320A															SLC8A1
																		ACP5	Acid Phosphatase 5, Tartrate Resistant	Protein Coding	47	GC19M011574	4.3	https://www.genecards.org/cgi-bin/carddisp.pl?gene=ACP5															SLC9A1
																		ABCC2	ATP Binding Cassette Subfamily C Member 2	Protein Coding	47	GC10P099782	4.3	https://www.genecards.org/cgi-bin/carddisp.pl?gene=ABCC2															Slc9a3
																		STAG1	Stromal Antigen 1	Protein Coding	42	GC03M136336	4.3	https://www.genecards.org/cgi-bin/carddisp.pl?gene=STAG1															SLC9B1
																		RNF126	Ring Finger Protein 126	Protein Coding	36	GC19M000647	4.3	https://www.genecards.org/cgi-bin/carddisp.pl?gene=RNF126															Slco1a5
																		ACRV1	Acrosomal Vesicle Protein 1	Protein Coding	35	GC11M125671	4.3	https://www.genecards.org/cgi-bin/carddisp.pl?gene=ACRV1															SLPI
																		SPACA1	Sperm Acrosome Associated 1	Protein Coding	33	GC06P088047	4.3	https://www.genecards.org/cgi-bin/carddisp.pl?gene=SPACA1															SLX4
																		VTRNA2-1	Vault RNA 2-1	RNA Gene	14	GC05M136081	4.3	https://www.genecards.org/cgi-bin/carddisp.pl?gene=VTRNA2-1															SMAD2
																		TNNI2	Troponin I2, Fast Skeletal Type	Protein Coding	44	GC11P001839	4.29	https://www.genecards.org/cgi-bin/carddisp.pl?gene=TNNI2															SMAD3
																		SLC22A2	Solute Carrier Family 22 Member 2	Protein Coding	44	GC06M160173	4.29	https://www.genecards.org/cgi-bin/carddisp.pl?gene=SLC22A2															SMAD4
																		WASHC5	WASH Complex Subunit 5	Protein Coding	32	GC08M128215	4.29	https://www.genecards.org/cgi-bin/carddisp.pl?gene=WASHC5															SMAD7
																		ECE1	Endothelin Converting Enzyme 1	Protein Coding	47	GC01M021217	4.29	https://www.genecards.org/cgi-bin/carddisp.pl?gene=ECE1															SMC1A
																		UBE2D1	Ubiquitin Conjugating Enzyme E2 D1	Protein Coding	45	GC10P058334	4.27	https://www.genecards.org/cgi-bin/carddisp.pl?gene=UBE2D1															SMC2
																		VAPB	VAMP Associated Protein B And C	Protein Coding	45	GC20P058389	4.27	https://www.genecards.org/cgi-bin/carddisp.pl?gene=VAPB															SMCHD1
																		ALS2	Alsin Rho Guanine Nucleotide Exchange Factor ALS2	Protein Coding	44	GC02M201701	4.27	https://www.genecards.org/cgi-bin/carddisp.pl?gene=ALS2															SMURF1
																		SLC39A13	Solute Carrier Family 39 Member 13	Protein Coding	43	GC11P047430	4.27	https://www.genecards.org/cgi-bin/carddisp.pl?gene=SLC39A13															SNCA
																		NEDD9	Neural Precursor Cell Expressed, Developmentally Down-Regulated 9	Protein Coding	42	GC06M011183	4.27	https://www.genecards.org/cgi-bin/carddisp.pl?gene=NEDD9															SNORD54
																		MR1	Major Histocompatibility Complex, Class I-Related	Protein Coding	41	GC01P181033	4.27	https://www.genecards.org/cgi-bin/carddisp.pl?gene=MR1															SNORD55
																		SCARA5	Scavenger Receptor Class A Member 5	Protein Coding	39	GC08M027869	4.27	https://www.genecards.org/cgi-bin/carddisp.pl?gene=SCARA5															SNRPN
																		SLC39A1	Solute Carrier Family 39 Member 1	Protein Coding	39	GC01M153960	4.27	https://www.genecards.org/cgi-bin/carddisp.pl?gene=SLC39A1															SNTA1
																		E4F1	E4F Transcription Factor 1	Protein Coding	36	GC16P002223	4.27	https://www.genecards.org/cgi-bin/carddisp.pl?gene=E4F1															SOCS1
																		MOB3B	MOB Kinase Activator 3B	Protein Coding	35	GC09M027332	4.27	https://www.genecards.org/cgi-bin/carddisp.pl?gene=MOB3B															SOCS3
																		SOST	Sclerostin	Protein Coding	44	GC17M043753	4.27	https://www.genecards.org/cgi-bin/carddisp.pl?gene=SOST															SOD1
																		AGXT	Alanine--Glyoxylate And Serine--Pyruvate Aminotransferase	Protein Coding	45	GC02P240868	4.27	https://www.genecards.org/cgi-bin/carddisp.pl?gene=AGXT															SOD2
																		HTR2C	5-Hydroxytryptamine Receptor 2C	Protein Coding	48	GC0XP114584	4.27	https://www.genecards.org/cgi-bin/carddisp.pl?gene=HTR2C															SOD3
																		NPC2	NPC Intracellular Cholesterol Transporter 2	Protein Coding	41	GC14M074476	4.26	https://www.genecards.org/cgi-bin/carddisp.pl?gene=NPC2															SOS1
																		C9orf72	C9orf72-SMCR8 Complex Subunit	Protein Coding	41	GC09M027539	4.26	https://www.genecards.org/cgi-bin/carddisp.pl?gene=C9orf72															SOS2
																		TMEM216	Transmembrane Protein 216	Protein Coding	36	GC11P061391	4.26	https://www.genecards.org/cgi-bin/carddisp.pl?gene=TMEM216															SOX2
																		H2AX	H2A.X Variant Histone	Protein Coding	35	GC11M119097	4.26	https://www.genecards.org/cgi-bin/carddisp.pl?gene=H2AX															SOX3
																		RASA1	RAS P21 Protein Activator 1	Protein Coding	46	GC05P087267	4.25	https://www.genecards.org/cgi-bin/carddisp.pl?gene=RASA1															SOX9
																		IBSP	Integrin Binding Sialoprotein	Protein Coding	37	GC04P087799	4.24	https://www.genecards.org/cgi-bin/carddisp.pl?gene=IBSP															SP1
																		NFATC1	Nuclear Factor Of Activated T Cells 1	Protein Coding	47	GC18P079395	4.24	https://www.genecards.org/cgi-bin/carddisp.pl?gene=NFATC1															SP3
																		SKA2	Spindle And Kinetochore Associated Complex Subunit 2	Protein Coding	36	GC17M059109	4.24	https://www.genecards.org/cgi-bin/carddisp.pl?gene=SKA2															SPEG
																		HACD1	3-Hydroxyacyl-CoA Dehydratase 1	Protein Coding	36	GC10M017589	4.24	https://www.genecards.org/cgi-bin/carddisp.pl?gene=HACD1															SPINK1
																		CYP2C9	Cytochrome P450 Family 2 Subfamily C Member 9	Protein Coding	48	GC10P094938	4.23	https://www.genecards.org/cgi-bin/carddisp.pl?gene=CYP2C9															SPINK5
																		NPHS2	NPHS2 Stomatin Family Member, Podocin	Protein Coding	41	GC01M179519	4.23	https://www.genecards.org/cgi-bin/carddisp.pl?gene=NPHS2															SPMD
[truncated: 2,463 more rows]
